# Supplementary material for: Platelet proteome reveals novel pathways of platelet activation and platelet-mediated immunoregulation in dengue
Source: PubMed Central journal article supplement (PMC5453622; doi:10.1371/journal.ppat.1006385), 2017-05-19

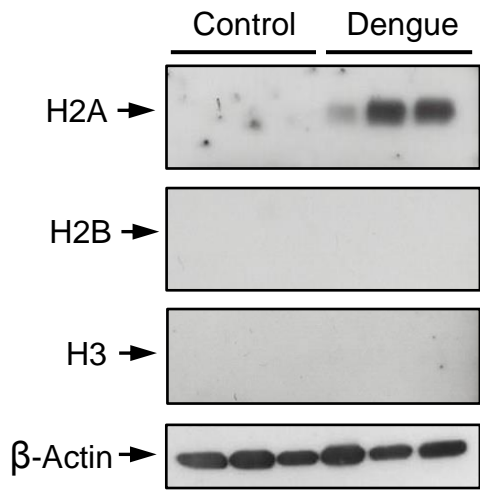

Supplement: ppat.1006385.s001.pdf [file ppat.1006385.s001.pdf]
