# Supplementary material for: Platelet proteome reveals novel pathways of platelet activation and platelet-mediated immunoregulation in dengue
Source: PLoS Pathog. 2017 May 19;13(5):e1006385. doi: 10.1371/journal.ppat.1006385 (PMC5453622; doi:10.1371/journal.ppat.1006385)
Supplement: S1 Table — (A) Absolute numbers of all peptides and proteins identified in platelet samples. (B) List of all peptides confidently identified in the platelet proteome. (C) List of all proteins confidently identified in the platelet proteome. (D) All proteins confidently identified in platelet samples with maximum parsimony criterion. (XLSX) [file ppat.1006385.s002.xlsx]

## Sheet: (A) AbsoluteNumbers
Supplemental Table 1a: Absolute numbers of all peptides and proteins identified in platelet samples.
	Control	Dengue	Total
Peptide Spectrum Match (PSM)	117911	143594	244791
Total number of peptides	13362	15792	18004
Number of unique peptides	8788	10503	12080
Total number of proteins entries	2896	2997	3336
Total number of proteins (using the maximum parsimony criterion)	1576	1629	1777

## Sheet: (B) All_identified_PEPTIDES
Supplemental Table 1b: List of all peptides confidently identified in the platelet proteome.
Sequence	Spectrum Count	Protein Count	Protein Identification
GYSFTTTAER	830	2	| nxp:NX_P63261-1 | nxp:NX_P60709-1
VAPEEHPVLLTEAPLNPK	574	2	| nxp:NX_P63261-1 | nxp:NX_P60709-1
AVAEQIPLLVQGVR	451	1	| nxp:NX_Q9Y490-1
ICLDLQAPLYK	334	1	| nxp:NX_P02776-1
VAVCDIPPR	305	3	| nxp:NX_Q9BUF5-1 | nxp:NX_Q13509-1 | nxp:NX_Q9H4B7-1
GTYIPVPIVSELQSGK	283	1	| nxp:NX_P00488-1
NIQSLEVIGK	270	1	| nxp:NX_P02775-1
VPTANVSVVDLTCR	268	1	| nxp:NX_P04406-1
DPVQLNLLYVQAR	259	1	| nxp:NX_Q9Y490-1
EEAPSLRPAPPPISGGGYR	247	1	| nxp:NX_P02675-1
AQQVSQGLDVLTAK	244	2	| nxp:NX_P18206-2 | nxp:NX_P18206-1
GLAGAVSELLR	236	1	| nxp:NX_Q9Y490-1
ALGDLISATK	235	1	| nxp:NX_Q9Y490-1
GEAQVWTQLLR	234	1	| nxp:NX_P08514-1
GSQAQPDSPSAQLALIAASQSFLQPGGK	228	1	| nxp:NX_Q9Y490-1
GTHCNQVEVIATLK	224	1	| nxp:NX_P02775-1
IVLLDVPVR	224	1	| nxp:NX_P08514-1
GSGDSSQVTQVSPQR	218	1	| nxp:NX_P05106-1
DSPSVWAAVPGK	218	1	| nxp:NX_P07737-1
TFVNITPAEVGVLVGK	217	1	| nxp:NX_P07737-1
VTAQGPGLEPSGNIANK	213	2	| nxp:NX_P21333-2 | nxp:NX_P21333-1
ASVQLLVQDSLNPAVK	211	1	| nxp:NX_P08514-1
DAVLLVFANK	210	3	| nxp:NX_P84085-1 | nxp:NX_P84077-1 | nxp:NX_P61204-1
DSTLIM(15.9949)QLLR	208	6	| nxp:NX_P27348-1 | nxp:NX_P63104-1 | nxp:NX_P31946-1 | nxp:NX_Q04917-1 | nxp:NX_P61981-1 | nxp:NX_P62258-1
ASTPNGYDNGIIWATWK	208	2	| nxp:NX_P02679-2 | nxp:NX_P02679-1
GPDPSSPAFR	204	1	| nxp:NX_P07996-1
LVINGNPITIFQER	202	1	| nxp:NX_P04406-1
GDLPFVVPR	202	1	| nxp:NX_P35579-1
AGQSAAGAAPGGGVDTR	201	2	| nxp:NX_P21333-2 | nxp:NX_P21333-1
ILAQATSDLVNAIK	201	1	| nxp:NX_Q9Y490-1
FEPLTLAAVGAASK	200	1	| nxp:NX_Q9Y490-1
EQVTNVGGAVVTGVTAVAQK	199	2	| nxp:NX_P37840-2 | nxp:NX_P37840-1
GNSFPASLVVAAEEGER	196	1	| nxp:NX_P08514-1
ALSTDPAAPNLK	195	1	| nxp:NX_Q9Y490-1
GGVNDNFQGVLQNVR	192	1	| nxp:NX_P07996-1
TGVELGKPTHFTVNAK	189	2	| nxp:NX_P21333-2 | nxp:NX_P21333-1
SSFYVNGLTLGGQK	188	1	| nxp:NX_P07737-1
TIVTTLQDSIR	184	1	| nxp:NX_P07996-1
LLAVAATAPPDAPNR	181	2	| nxp:NX_P18206-2 | nxp:NX_P18206-1
VAQPTITDNKDGTVTVR	180	2	| nxp:NX_P21333-2 | nxp:NX_P21333-1
YTPVQQGPVGVNVTYGGDPIPK	176	2	| nxp:NX_P21333-2 | nxp:NX_P21333-1
AGALNSNDAFVLK	174	2	| nxp:NX_P06396-3 | nxp:NX_P06396-1
ALASQLQDSLK	173	2	| nxp:NX_P18206-2 | nxp:NX_P18206-1
VPVHDVTDASK	173	2	| nxp:NX_P21333-2 | nxp:NX_P21333-1
ALGQNPTNAEVLK	173	2	| nxp:NX_P60660-1 | nxp:NX_P60660-2
ADDGRPFPQVIK	173	1	| nxp:NX_P04075-2
AGFAGDDAPR	172	8	| nxp:NX_P63261-1 | nxp:NX_P68133-1 | nxp:NX_P68032-1 | nxp:NX_P63267-1 | nxp:NX_P62736-1 | nxp:NX_A5A3E0-1 | nxp:NX_Q6S8J3-1 | nxp:NX_P60709-1
ALLVTASQCQQPAENK	172	2	| nxp:NX_Q01518-2 | nxp:NX_Q01518-1
SIQFVDWCPTGFK	171	2	| nxp:NX_P68366-1 | nxp:NX_P68363-1
EGLLLWCQR	170	6	| nxp:NX_P12814-1 | nxp:NX_O43707-1 | nxp:NX_P12814-3 | nxp:NX_P35609-1 | nxp:NX_Q08043-1 | nxp:NX_P12814-2
ICLDPDAPR	168	1	| nxp:NX_P02775-1
AGALQCSPSDAYTK	168	1	| nxp:NX_Q9Y490-1
SYELPDGQVITIGNER	167	9	| nxp:NX_P63261-1 | nxp:NX_Q562R1-1 | nxp:NX_P68032-1 | nxp:NX_A5A3E0-1 | nxp:NX_Q6S8J3-1 | nxp:NX_P63267-1 | nxp:NX_P68133-1 | nxp:NX_P62736-1 | nxp:NX_P60709-1
DNGNGTYSCSYVPR	165	2	| nxp:NX_P21333-2 | nxp:NX_P21333-1
AVAGNISDPGLQK	164	2	| nxp:NX_P18206-2 | nxp:NX_P18206-1
GQVLVFLGQSEGLR	163	1	| nxp:NX_P08514-1
PGSTGTWNPGSSER	162	2	| nxp:NX_P02671-2 | nxp:NX_P02671-1
SPFSVAVSPSLDLSK	162	2	| nxp:NX_P21333-2 | nxp:NX_P21333-1
LIALLEVLSQK	161	10	| nxp:NX_P21333-2 | nxp:NX_P21333-1 | nxp:NX_O75369-6 | nxp:NX_O75369-3 | nxp:NX_O75369-2 | nxp:NX_O75369-9 | nxp:NX_O75369-1 | nxp:NX_O75369-8 | nxp:NX_Q14315-2 | nxp:NX_Q14315-1
GNDIIAAAK	159	2	| nxp:NX_P18206-2 | nxp:NX_P18206-1
AGPHCPTAQLIATLK	158	2	| nxp:NX_P02776-1 | nxp:NX_P10720-1
AWGPGLEGGVVGK	158	2	| nxp:NX_P21333-2 | nxp:NX_P21333-1
AGDALWLR	158	2	| nxp:NX_Q86UX7-2 | nxp:NX_Q86UX7-1
GTSQNDPNWVVR	158	1	| nxp:NX_P07996-1
APDFVFYAPR	157	4	| nxp:NX_P26038-1 | nxp:NX_P35241-4 | nxp:NX_P35241-5 | nxp:NX_P15311-1
FGSYCPTTCGIADFLSTYQTK	157	2	| nxp:NX_P02679-2 | nxp:NX_P02679-1
TLAESALQLLYTAK	157	1	| nxp:NX_Q9Y490-1
LDGSVDFKK	156	2	| nxp:NX_P02679-2 | nxp:NX_P02679-1
DVNAAIAAIK	156	1	| nxp:NX_P68366-1
LHTDDELNWLDHGR	156	1	| nxp:NX_Q9Y490-1
NLLSVAYK	153	6	| nxp:NX_P27348-1 | nxp:NX_P63104-1 | nxp:NX_P31946-1 | nxp:NX_Q04917-1 | nxp:NX_P61981-1 | nxp:NX_P62258-1
VLLLGSQQAGTTLNLDLGGK	153	1	| nxp:NX_P08514-1
ELTPQVVSAAR	152	2	| nxp:NX_P18206-2 | nxp:NX_P18206-1
GQDLLSTVSIR	152	1	| nxp:NX_P07359-1
IVADKDYSVTANSK	151	1	| nxp:NX_P07195-1
LLSDSLPPSTGTFQEAQSR	151	1	| nxp:NX_Q9Y490-1
ALDFIASK	147	5	| nxp:NX_P12814-1 | nxp:NX_O43707-1 | nxp:NX_P12814-3 | nxp:NX_Q08043-1 | nxp:NX_P12814-2
NGHVGISFVPK	147	2	| nxp:NX_P21333-2 | nxp:NX_P21333-1
EFTPPVQAAYQK	147	1	| nxp:NX_P68871-1
LDVQFSGLTK	146	2	| nxp:NX_P21333-2 | nxp:NX_P21333-1
SALQLLYTAK	146	1	| nxp:NX_Q9Y490-1
NALWHTGNTPGQVR	145	1	| nxp:NX_P07996-1
EATSTFTNITYR	143	1	| nxp:NX_P05106-1
NDASHLLVFTTDAK	143	1	| nxp:NX_P05106-1
VLVQNAAGSQEK	143	1	| nxp:NX_Q9Y490-1
VQNATLAVANITNADSATR	142	1	| nxp:NX_P27105-1
EVANSTANLVK	141	1	| nxp:NX_Q9Y490-1
ADLINNLGTIAK	140	2	| nxp:NX_P08238-1 | nxp:NX_P07900-2
RGDLPFVVPR	140	1	| nxp:NX_P35579-1
NPSSAGSWNSGSSGPGSTGNR	139	2	| nxp:NX_P02671-2 | nxp:NX_P02671-1
VALEGLRPTIPPGISPH	139	1	| nxp:NX_Q13418-1
GSESGIFTNTK	138	2	| nxp:NX_P02671-2 | nxp:NX_P02671-1
LAAVDATVNQVLASR	138	2	| nxp:NX_Q15084-1 | nxp:NX_Q15084-2
AAM(15.9949)EPIVISAK	138	1	| nxp:NX_Q9Y490-1
VLGAFSDGLAHLDNLK	137	2	| nxp:NX_P02042-1 | nxp:NX_P68871-1
QVAASTAQLLVACK	137	1	| nxp:NX_Q9Y490-1
PQPPPDPLLLQR	136	2	| nxp:NX_Q86UX7-2 | nxp:NX_Q86UX7-1
LFDQAFGLPR	136	1	| nxp:NX_P04792-1
AGFLDLK	136	1	| nxp:NX_Q9Y490-1
HITSLEVIK	134	2	| nxp:NX_P02776-1 | nxp:NX_P10720-1
AFLASPEYVNLPINGNGK	134	1	| nxp:NX_P09211-1
TVTNAVVTVPAYFNDSQR	134	1	| nxp:NX_P11142-1
KVEAQLQELQVK	134	1	| nxp:NX_P35579-1
GSTLTSPCQDFGK	133	1	| nxp:NX_P08567-1
NFINNPLAQADWAAK	133	1	| nxp:NX_P35579-1
CHAGHLNGVYYQGGTYSK	132	2	| nxp:NX_P02679-2 | nxp:NX_P02679-1
DNHLLGTFDLTGIPPAPR	132	1	nxp:NX_P11021-1
QGFGNVATNTDGK	131	1	| nxp:NX_P02675-1
ASITALEAK	130	1	| nxp:NX_P35579-1
LDPHLVLDQLR	129	5	| nxp:NX_P35579-1 | nxp:NX_P35580-1 | nxp:NX_P35580-2 | nxp:NX_P35580-3 | nxp:NX_P35580-4
ELLPVLISAM(15.9949)K	129	2	| nxp:NX_P18206-2 | nxp:NX_P18206-1
TGVAVNKPAEFTVDAK	129	2	| nxp:NX_P21333-2 | nxp:NX_P21333-1
LPQLPITNF	128	2	| nxp:NX_P21333-2 | nxp:NX_P21333-1
LGYAGNTEPQFIIPSCIAIK	128	1	| nxp:NX_P61158-1
TYFPHFDLSHGSAQVK	128	1	| nxp:NX_P69905-1
QAAASATQTIAAAQHAASTPK	128	1	| nxp:NX_Q9Y490-1
VNPFRPGDSEPPPAPGAQR	127	1	| nxp:NX_Q15942-1
APSDLYQIILK	126	1	| nxp:NX_P07384-1
LTVSSLQESGLK	125	2	| nxp:NX_P21333-2 | nxp:NX_P21333-1
GKEESLDSDLYAELR	125	1	| nxp:NX_P02775-1
VGAHAGEYGAEALER	125	1	| nxp:NX_P69905-1
NLGTALAELR	125	1	| nxp:NX_Q9Y490-1
GTFATLSELHCDK	124	1	| nxp:NX_P68871-1
DPPSWSVLAGH	122	1	| nxp:NX_Q9Y490-1
GQHVPGSPFQFTVGPLGEGGAHK	121	4	| nxp:NX_P21333-2 | nxp:NX_P21333-1 | nxp:NX_Q14315-2 | nxp:NX_Q14315-1
VVLAGGVAPALF	121	2	| nxp:NX_Q86UX7-2 | nxp:NX_Q86UX7-1
KDGTHVVENVDATHIGK	121	1	| nxp:NX_P00488-1
KDVLETFTVK	117	1	| nxp:NX_P21926-1
SPYTVTVGQACNPSACR	116	2	| nxp:NX_P21333-2 | nxp:NX_P21333-1
NVGSQTLQTFK	116	1	| nxp:NX_P08514-1
LGVQDLFNSSK	116	1	| nxp:NX_P30740-1
ADLTALFLPR	115	3	| nxp:NX_Q13045-2 | nxp:NX_Q13045-3 | nxp:NX_Q13045-1
VAQPTITDNK	115	2	| nxp:NX_P21333-2 | nxp:NX_P21333-1
AIFLADGNVFTTGFSR	115	1	| nxp:NX_Q9ULV4-1
YLQEIYNSNNQK	114	2	| nxp:NX_P02679-2 | nxp:NX_P02679-1
LKPEDITQIQPQQLVLR	114	1	| nxp:NX_P05556-1
FTGSQPFGQGVEHATANK	114	1	| nxp:NX_P07996-1
CGTGIVGVFVK	113	1	| nxp:NX_O00151-1
LKDDEVAQLKK	113	1	| nxp:NX_P07195-1
TPVGSCFLAQPESGR	113	1	| nxp:NX_P08514-1
VVLAYEPVWAIGTGK	112	1	| nxp:NX_P60174-3
ADLIAYLK	112	1	| nxp:NX_P99999-1
ALEATTEHIR	112	1	| nxp:NX_Q9Y490-1
AHEPTYFTVDCAEAGQGDVSIGIK	111	2	| nxp:NX_P21333-2 | nxp:NX_P21333-1
KQELEEICHDLEAR	111	1	| nxp:NX_P35579-1
TETQEKNPLPSK	111	1	| nxp:NX_P62328-1
LTLDTIFVPNTGK	111	1	| nxp:NX_Q9Y277-1
LNEAAAGLNQAATELVQASR	111	1	| nxp:NX_Q9Y490-1
GNFNYIEFTR	110	2	| nxp:NX_P19105-1 | nxp:NX_O14950-1
ANLPQSFQVDTSK	110	2	| nxp:NX_P21333-2 | nxp:NX_P21333-1
ASSEGGTAAGAGLDSLHK	110	1	| nxp:NX_O15143-1
WDTANNPLYK	110	1	| nxp:NX_P05106-1
TLGPSQEETGGVFLCPWR	110	1	| nxp:NX_P08514-1
IGITNHDEYSLVR	110	1	| nxp:NX_Q9Y490-1
QFGAQANVIGPWIQTK	109	3	| nxp:NX_P12814-1 | nxp:NX_P12814-3 | nxp:NX_P12814-2
THEAEIVEGENHTYCIR	109	2	| nxp:NX_P21333-2 | nxp:NX_P21333-1
LPACVVDCGTGYTK	109	1	| nxp:NX_P61158-1
PAAVAAENEEIGSHIK	109	1	| nxp:NX_Q9Y490-1
AALLEDEGGSGRPLLQAAK	109	1	| nxp:NX_Q9Y490-1
IGFPWSEIR	108	4	| nxp:NX_P26038-1 | nxp:NX_P35241-4 | nxp:NX_P35241-5 | nxp:NX_P15311-1
YSNSALGHVNCTIK	108	4	| nxp:NX_Q9NQC3-3 | nxp:NX_Q9NQC3-2 | nxp:NX_Q9NQC3-5 | nxp:NX_Q9NQC3-1
STVLTIPEIIIK	108	1	| nxp:NX_P00488-1
ACQSLGEPGCTQAQVLSAATIVAK	108	1	| nxp:NX_Q9Y490-1
LVFLGLDNAGK	107	2	| nxp:NX_Q9Y6B6-1 | nxp:NX_Q9NR31-1
CASPSLAAHGPLGR	107	1	| nxp:NX_P14770-1
HVLTLTDQVTR	106	1	| nxp:NX_P05106-1
LTVLPPELGNLDLTGQK	105	1	| nxp:NX_Q15404-1
GASALQLER	105	1	| nxp:NX_Q9H4B7-1
NSSYFVEWIPNNVK	104	5	| nxp:NX_P07437-1 | nxp:NX_P68371-1 | nxp:NX_Q9BUF5-1 | nxp:NX_Q13509-1 | nxp:NX_P04350-1
GCVVTSVESNSNGR	103	1	| nxp:NX_P08567-1
IEVEKPFAIAK	103	1	| nxp:NX_P23284-1
VSHLLGINVTDFTR	103	1	| nxp:NX_P35579-1
YEILTPNSIPK	103	1	| nxp:NX_P35579-1
AAFFDTASTGK	102	2	| nxp:NX_P02671-2 | nxp:NX_P02671-1
YEASILTHDSSIR	102	2	| nxp:NX_P02679-2 | nxp:NX_P02679-1
VVFQEFR	102	1	| nxp:NX_P35579-1
DGLGFCALIHR	101	3	| nxp:NX_P12814-1 | nxp:NX_P12814-3 | nxp:NX_P12814-2
GGPEAPIPPPPQPR	101	1	| nxp:NX_Q15942-1
LLAALLEDEGGSGRPLLQAAK	101	1	| nxp:NX_Q9Y490-1
VQELGHGCAALVTK	101	1	| nxp:NX_Q9Y490-1
LLVVYPWTQR	100	5	| nxp:NX_P02042-1 | nxp:NX_P68871-1 | nxp:NX_P02100-1 | nxp:NX_P69892-1 | nxp:NX_P69891-1
KHEAFESDLAAHQDR	100	5	| nxp:NX_P12814-1 | nxp:NX_O43707-1 | nxp:NX_P12814-3 | nxp:NX_P35609-1 | nxp:NX_P12814-2
GIADFLSTYQTK	100	2	| nxp:NX_P02679-2 | nxp:NX_P02679-1
LAEQLEQTKR	100	1	| nxp:NX_P35579-1
DQALQLQVLNSR	100	1	| nxp:NX_Q13201-1
GDDTPLHLAASHGHR	100	1	| nxp:NX_Q13418-1
ALDTVLFGPPLLTR	100	1	| nxp:NX_Q13586-1
DLILSVLQR	100	1	| nxp:NX_Q96C24-1
DAGVIAGLNVLR	99	2	| nxp:NX_P08107-1 | nxp:NX_P34931-1
NNRPSEGPLQTR	99	2	| nxp:NX_Q00610-2 | nxp:NX_Q00610-1
TPCTVSCNIPVVSGK	99	1	| nxp:NX_P02675-1
TYGVSFFLVK	99	1	| nxp:NX_Q9Y490-1
KEEELQAALAR	98	5	| nxp:NX_P35579-1 | nxp:NX_P35749-4 | nxp:NX_P35749-3 | nxp:NX_P35749-1 | nxp:NX_P35749-2
RDQALTEEHAR	98	3	| nxp:NX_P12814-1 | nxp:NX_P12814-3 | nxp:NX_P12814-2
AGTLDLSLTVQGK	98	1	| nxp:NX_P07996-1
SAVTALWGK	98	1	| nxp:NX_P68871-1
TFTAWCNSHLR	97	6	| nxp:NX_P12814-1 | nxp:NX_O43707-1 | nxp:NX_P12814-3 | nxp:NX_P35609-1 | nxp:NX_Q08043-1 | nxp:NX_P12814-2
DGTHVVENVDATHIGK	97	1	| nxp:NX_P00488-1
DFLAGGVAAAISK	97	1	| nxp:NX_P05141-1
ALTVPELTQQVFDAK	97	1	| nxp:NX_P07437-1
AVLFCLSEDKK	97	1	| nxp:NX_P23528-1
ISHLIEPLANAAR	97	1	| nxp:NX_Q9Y490-1
SQIFSTASDNQPTVTIK	97	1	nxp:NX_P11021-1
GLGDCLVK	96	2	| nxp:NX_P12236-1 | nxp:NX_P05141-1
STVEGIQASVK	96	2	| nxp:NX_P18206-2 | nxp:NX_P18206-1
KDEILGIANNR	96	2	| nxp:NX_Q86UX7-2 | nxp:NX_Q86UX7-1
VVLAGGVAPALFR	96	2	| nxp:NX_Q86UX7-2 | nxp:NX_Q86UX7-1
ENNAVYAFLGLTAPPGSK	96	1	| nxp:NX_O75368-1
KICLDPDAPR	96	1	| nxp:NX_P02775-1
PYQYPALTPEQK	96	1	| nxp:NX_P04075-2
IENLTSAVNSLNFIIK	96	1	| nxp:NX_Q13201-1
QHPVPPPAQNQNQVR	96	1	| nxp:NX_Q15942-1
LGALFQPDSFVHGNSGAGNNWAK	96	1	| nxp:NX_Q9H4B7-1
NSSCFVEWIPNNVK	96	1	| nxp:NX_Q9H4B7-1
DTVQIHDITGK	95	2	| nxp:NX_P02679-2 | nxp:NX_P02679-1
VAPDEHPILLTEAPLNPK	95	1	| nxp:NX_Q562R1-1
NADPILISLK	95	1	| nxp:NX_Q9ULV4-1
HRPELIDYGK	94	3	| nxp:NX_P12814-1 | nxp:NX_P12814-3 | nxp:NX_P12814-2
VVEHPEFLK	94	2	| nxp:NX_P06396-3 | nxp:NX_P06396-1
LENNHAQLLR	94	1	| nxp:NX_O95810-1
LGGSAVISLEGKPL	94	1	| nxp:NX_P23528-1
DVNVAIAAIK	94	1	| nxp:NX_Q9NY65-1
TEDSGLQTQVIAAATQCALSTSQLVACTK	94	1	| nxp:NX_Q9Y490-1
KVPQVSTPTLVEVSR	94	1	nxp:NX_P02768-1
VNQPASFAVSLNGAK	93	2	| nxp:NX_P21333-2 | nxp:NX_P21333-1
YGGPYHIGGSPFK	93	2	| nxp:NX_P21333-2 | nxp:NX_P21333-1
GCITIIGGGDTATCCAK	93	1	| nxp:NX_P00558-1
IGAEVYHNLK	93	1	| nxp:NX_P06733-1
DFLAGGIAAAISK	93	1	| nxp:NX_P12236-1
ANINVENAFFTLAR	93	1	| nxp:NX_P61006-1
GSAPPGPVPEGSIR	93	1	| nxp:NX_P78417-1
VYEGERPLTK	93	1	nxp:NX_P11021-1
HVVPNEVVVQR	92	2	| nxp:NX_P06396-3 | nxp:NX_P06396-1
TFIAIKPDGVQR	92	2	| nxp:NX_P15531-2 | nxp:NX_P22392-2
HFCPNVPIILVGNK	92	2	| nxp:NX_P61586-1 | nxp:NX_P08134-1
LLALGDSGVGK	92	1	| nxp:NX_O00194-1
GPSWDPFR	92	1	| nxp:NX_P04792-1
M(15.9949)FLSFPTTK	92	1	| nxp:NX_P69905-1
EAAYHPEVAPDVR	92	1	| nxp:NX_Q9Y490-1
TPSAAYLWVGTGASEAEK	91	2	| nxp:NX_P06396-3 | nxp:NX_P06396-1
DKGEYTLVVK	91	2	| nxp:NX_P21333-2 | nxp:NX_P21333-1
FNEEHIPDSPFVVPVASPSGDAR	91	2	| nxp:NX_P21333-2 | nxp:NX_P21333-1
AEAGVPAEFSIWTR	91	2	| nxp:NX_P21333-2 | nxp:NX_P21333-1
LIASM(15.9949)SSDSLR	91	1	| nxp:NX_P00488-1
ALESPERPFLAILGGAK	91	1	| nxp:NX_P00558-1
DISTNYYASQK	91	1	| nxp:NX_P14625-1
GLFIIDPNGVIK	91	1	| nxp:NX_P30048-1
AADGSPCNVLLCSVVPSR	91	1	| nxp:NX_Q5SQ64-1
AAAFEEQENETVVVK	91	1	| nxp:NX_Q9Y490-1
SEDCFILDHGK	90	2	| nxp:NX_P06396-3 | nxp:NX_P06396-1
YNEQHVPGSPFTAR	90	2	| nxp:NX_P21333-2 | nxp:NX_P21333-1
EGVHGGLINK	90	1	| nxp:NX_P07737-1
YLTVACIFR	90	1	| nxp:NX_Q9H4B7-1
VGAIPANALDDGQWSQGLISAAR	90	1	| nxp:NX_Q9Y490-1
AVTDSINQLITM(15.9949)CTQQAPGQK	90	1	| nxp:NX_Q9Y490-1
NLDIERPTYTNLNR	89	8	| nxp:NX_P68366-1 | nxp:NX_Q9NY65-1 | nxp:NX_Q9BQE3-1 | nxp:NX_Q71U36-1 | nxp:NX_P68363-1 | nxp:NX_Q13748-1 | nxp:NX_Q13748-2 | nxp:NX_Q6PEY2-1
EGFGHLSPTGTTEFWLGNEK	89	2	| nxp:NX_P02679-2 | nxp:NX_P02679-1
APSVANVGSHCDLSLK	89	2	| nxp:NX_P21333-2 | nxp:NX_P21333-1
LISWYDNEFGYSNR	89	1	| nxp:NX_P04406-1
ACLDYPVTSVLPPASLCK	89	1	| nxp:NX_P53801-1
FLIPNASQAESK	89	1	| nxp:NX_P63104-1
VSSGYVPPPVATPFSSK	89	1	| nxp:NX_Q15942-1
SIAAATSALVK	89	1	| nxp:NX_Q9Y490-1
CVSCLPGQR	89	1	| nxp:NX_Q9Y490-1
VAQLEAQCQEPCKDTVQIHDITGK	88	2	| nxp:NX_P02679-2 | nxp:NX_P02679-1
QTQVSVLPEGGETPLFK	88	2	| nxp:NX_P06396-3 | nxp:NX_P06396-1
TASDFITK	88	2	| nxp:NX_P06396-3 | nxp:NX_P06396-1
DVDIIDHHDNTYTVK	88	2	| nxp:NX_P21333-2 | nxp:NX_P21333-1
ADDKETCFAEEGKK	88	1	| nxp:NX_P02768-1
TYNFLPEFLVSTQK	88	1	| nxp:NX_P30740-1
NLTNPNTVIILIGNK	88	1	| nxp:NX_P61106-1
EVQGFESATFLGYFK	87	2	| nxp:NX_P06396-3 | nxp:NX_P06396-1
AAVPSGASTGIYEALELR	87	2	| nxp:NX_P09104-1 | nxp:NX_P06733-1
LKLEDFFAR	87	2	| nxp:NX_P11413-3 | nxp:NX_P11413-2
YGGQPVPNFPSK	87	2	| nxp:NX_P21333-2 | nxp:NX_P21333-1
VTPPEGYEVVTVFPK	87	1	| nxp:NX_O00151-1
DFLQLFAPR	87	1	| nxp:NX_O43294-1
LVAASQAALGL	87	1	| nxp:NX_P02768-1
TLM(15.9949)NLGGLAVAR	87	1	| nxp:NX_P37802-1
YLAEVAAGDDKK	87	1	| nxp:NX_P63104-1
IQTLSAIDTIK	87	1	| nxp:NX_Q3ZCW2-1
DGLILTSR	87	1	| nxp:NX_Q99497-1
TINEVENQILTR	86	4	| nxp:NX_P12814-1 | nxp:NX_O43707-1 | nxp:NX_P12814-3 | nxp:NX_P12814-2
ACANPAAGSVILLENLR	86	1	| nxp:NX_P00558-1
ALGAPSLLLTGTQLYGR	86	1	| nxp:NX_P08514-1
YKGQHVPGSPFQFTVGPLGEGGAHK	85	2	| nxp:NX_P21333-2 | nxp:NX_P21333-1
WGDEHIPGSPYR	84	2	| nxp:NX_P21333-2 | nxp:NX_P21333-1
NYPATFWVNPQFK	84	1	| nxp:NX_P07384-1
SQVLQFFSSDICR	84	1	| nxp:NX_P16671-1
DTNGSQFFITTVK	84	1	| nxp:NX_P23284-1
AVDSLVPIGR	84	1	| nxp:NX_P25705-1
VIQYLAYVASSHK	84	1	| nxp:NX_P35579-1
DKAPGQLECETAIAALNSCLR	84	1	| nxp:NX_Q9Y490-1
VVAPTISSPVCQEQLVEAGR	84	1	| nxp:NX_Q9Y490-1
LVIVGDGACGK	83	2	| nxp:NX_P61586-1 | nxp:NX_P08134-1
ISVYYNEATGGK	83	1	| nxp:NX_P07437-1
TFSVWYVPEVTGTHK	82	2	| nxp:NX_P21333-2 | nxp:NX_P21333-1
AHVVPCFDASK	82	2	| nxp:NX_P21333-2 | nxp:NX_P21333-1
TGSGGPGNHPHGPDASAEGLNPYGLVAPR	82	2	| nxp:NX_Q86UX7-2 | nxp:NX_Q86UX7-1
VFDEFKPLVEEPQNLIK	82	1	| nxp:NX_P02768-1
FVFGTTPEDILR	82	1	| nxp:NX_P07996-1
IKDPDASKPEDWDER	82	1	| nxp:NX_P27797-1
GCDVVVIPAGVPR	82	1	| nxp:NX_P40926-1
GGGTSCGPAQNPPNNQTPSS	82	1	| nxp:NX_Q86YW5-1
GLQSGVDIGVK	82	1	| nxp:NX_Q99439-1
ACEFAGFQCQIQFGPHNEQK	82	1	| nxp:NX_Q9Y490-1
KELIECAR	82	1	| nxp:NX_Q9Y490-1
AVASAAAALVLK	82	1	| nxp:NX_Q9Y490-1
LTEAPLNPK	81	8	| nxp:NX_P63261-1 | nxp:NX_Q562R1-1 | nxp:NX_P63267-1 | nxp:NX_P68133-1 | nxp:NX_P62736-1 | nxp:NX_P68032-1 | nxp:NX_Q6S8J3-1 | nxp:NX_P60709-1
ALYDICFR	81	6	| nxp:NX_P07437-1 | nxp:NX_P68371-1 | nxp:NX_Q9BUF5-1 | nxp:NX_Q13509-1 | nxp:NX_Q9H4B7-1 | nxp:NX_P04350-1
QEYDESGPSIVHR	81	4	| nxp:NX_P63261-1 | nxp:NX_A5A3E0-1 | nxp:NX_Q6S8J3-1 | nxp:NX_P60709-1
AGEYAVHVLCNSEDIR	81	2	| nxp:NX_P21333-2 | nxp:NX_P21333-1
ATCAPQHGAPGPGPADASK	81	2	| nxp:NX_P21333-2 | nxp:NX_P21333-1
VLIFQEENEIPASVFVK	81	1	| nxp:NX_O95810-1
SLHTLFGDK	81	1	| nxp:NX_P02768-1
PLAGGEPVSLGSLR	81	1	| nxp:NX_P07203-1
STGGAPTFNVTVTK	81	1	| nxp:NX_P07737-1
SVADSVLFLR	81	1	| nxp:NX_P24557-1
TIEAEAAHGTVTR	81	1	| nxp:NX_P48735-1
DPPSWSVLAGHSR	81	1	| nxp:NX_Q9Y490-1
LGPLANQLTSDYGR	81	1	| nxp:NX_Q9Y490-1
DSTLIMQLLR	80	6	| nxp:NX_P27348-1 | nxp:NX_P63104-1 | nxp:NX_P31946-1 | nxp:NX_Q04917-1 | nxp:NX_P61981-1 | nxp:NX_P62258-1
NDPYHPDHFNCANCGK	80	4	| nxp:NX_P48059-4 | nxp:NX_P48059-2 | nxp:NX_P48059-5 | nxp:NX_P48059-3
GPLPAAPPVAPER	80	3	| nxp:NX_Q9NQC3-2 | nxp:NX_Q9NQC3-5 | nxp:NX_Q9NQC3-1
SLGEISALTSK	80	2	| nxp:NX_P18206-2 | nxp:NX_P18206-1
INSITVDNCK	80	2	| nxp:NX_Q01518-2 | nxp:NX_Q01518-1
AHYGGFTVQNEANK	80	1	| nxp:NX_P02675-1
VLDSGAPIKIPVGPETLGR	80	1	| nxp:NX_P06576-1
LLQDFFNGR	80	1	| nxp:NX_P08107-1
LLGINVTDFTR	80	1	| nxp:NX_P35579-1
QQPGPSEHIER	80	1	| nxp:NX_P50552-1
TAHLGANPWR	79	2	| nxp:NX_P13224-1 | nxp:NX_P13224-2
TDAGFTLR	79	2	| nxp:NX_P18206-2 | nxp:NX_P18206-1
FNGTHIPGSPFK	79	2	| nxp:NX_P21333-2 | nxp:NX_P21333-1
IISNASCTTNCLAPLAK	79	1	| nxp:NX_P04406-1
DGVVLFK	79	1	| nxp:NX_P07237-1
TDKTLVLLMGK	79	1	| nxp:NX_P07737-1
DAVLLLFANK	79	1	| nxp:NX_P18085-1
FLSNGHVTIPGQQDK	79	1	| nxp:NX_P35579-1
SNVSDAVAQSTR	79	1	| nxp:NX_P60174-3
SPSSSQPLPQVPAPAQSQTQF	79	1	| nxp:NX_Q15942-1
AGVLAHLEEER	78	5	| nxp:NX_P35579-1 | nxp:NX_P35580-1 | nxp:NX_P35580-2 | nxp:NX_P35580-3 | nxp:NX_P35580-4
ADFCIIHYAGK	78	5	| nxp:NX_P35579-1 | nxp:NX_P35580-1 | nxp:NX_P35580-2 | nxp:NX_P35580-3 | nxp:NX_P35580-4
SLLDASEEAIKK	78	2	| nxp:NX_P18206-2 | nxp:NX_P18206-1
TLVLLMGK	78	1	| nxp:NX_P07737-1
KDHSGQVFSVVSNGK	78	1	| nxp:NX_P07996-1
LVPNPDQK	78	1	| nxp:NX_P07996-1
VSFELFADKVPK	78	1	| nxp:NX_P62937-1
LASEAKPAAVAAENEEIGSHIK	78	1	| nxp:NX_Q9Y490-1
KEEITGTLR	78	1	| nxp:NX_Q9Y490-1
SEAKPAAVAAENEEIGSHIK	78	1	| nxp:NX_Q9Y490-1
TLSDYNIQK	77	4	nxp:NX_P62987-1 | nxp:NX_P62979-1 | nxp:NX_P0CG47-1 | nxp:NX_P0CG48-1
FGGEHVPNSPFQVTALAGDQPSVQPPLR	77	2	| nxp:NX_P21333-2 | nxp:NX_P21333-1
GEFVTTVQQR	77	2	| nxp:NX_P40925-1 | nxp:NX_P40925-3
LTQLYEQAR	77	2	| nxp:NX_Q86UX7-2 | nxp:NX_Q86UX7-1
SRPQPPPDPLLLQR	77	2	| nxp:NX_Q86UX7-2 | nxp:NX_Q86UX7-1
THTCPPCPAPELLGGPSVFLFPPKPK	77	1	| nxp:NX_P01857-1
TLMNLGGLAVAR	77	1	| nxp:NX_P37802-1
TKPYIQVDIGGGQTK	77	1	nxp:NX_P11021-1
FVIKPIDK	76	4	| nxp:NX_P26038-1 | nxp:NX_P35241-4 | nxp:NX_P35241-5 | nxp:NX_P15311-1
CVAPPALR	76	2	| nxp:NX_P13224-1 | nxp:NX_P13224-2
IHEGCEEPATHNALAK	76	2	| nxp:NX_Q00610-2 | nxp:NX_Q00610-1
VFASLPQVER	76	1	| nxp:NX_O75083-1
NRIPESGGDNSVFDIFELTGAAR	76	1	| nxp:NX_P07996-1
QQDHFFQAAFLEER	76	1	| nxp:NX_P08567-1
GNFNYVEFTR	76	1	| nxp:NX_P24844-1
ALTSELANAR	76	1	| nxp:NX_P26038-1
DPNIVIAK	76	1	| nxp:NX_P30101-1
ALAGCDFLTISPK	76	1	| nxp:NX_P37837-1
ASIPFSVVGSNQLIEAK	76	1	| nxp:NX_Q15019-2
LAQAAQSSVATITR	76	1	| nxp:NX_Q9Y490-1
NELLGAAAAIEAAAK	76	1	| nxp:NX_Q9Y490-1
IWHHTFYNELR	75	6	| nxp:NX_P63261-1 | nxp:NX_P68133-1 | nxp:NX_P68032-1 | nxp:NX_A5A3E0-1 | nxp:NX_Q6S8J3-1 | nxp:NX_P60709-1
DFLTPPLLSVR	75	2	| nxp:NX_O95782-2 | nxp:NX_O95782-1
TLHPDLGTDKDK	75	2	| nxp:NX_P00338-3 | nxp:NX_P00338-4
ESSSHHPGIAEFPSR	75	2	| nxp:NX_P02671-2 | nxp:NX_P02671-1
LTDELAPPKPPLPEGEVPPPRPPPPEEK	75	2	| nxp:NX_P18206-2 | nxp:NX_P18206-1
IINEPTAAAIAYGLDKK	75	2	nxp:NX_P11142-1 | nxp:NX_P54652-1 |
IGFGAFVDKPVSPY	75	1	| nxp:NX_P05106-1
GECLCGQCVCHSSDFGK	75	1	| nxp:NX_P05106-1
VVFVFGPDK	75	1	| nxp:NX_P30041-1
ITHLPGALLDK	75	1	| nxp:NX_P40197-1
AIADTGANVVVTGGK	75	1	| nxp:NX_P50990-1
EIFGLYGQTTGK	75	1	| nxp:NX_Q9NR31-1
AQYFEPLTLAAVGAASK	75	1	| nxp:NX_Q9Y490-1
LLQDFFNGK	74	3	| nxp:NX_P17066-1 | nxp:NX_P11142-1 | nxp:NX_P54652-1
QLEQVIAK	74	2	| nxp:NX_P02671-2 | nxp:NX_P02671-1
LVSNHSLHETSSVFVDSLTK	74	2	| nxp:NX_P21333-2 | nxp:NX_P21333-1
VDVGKDQEFTVK	74	2	| nxp:NX_P21333-2 | nxp:NX_P21333-1
RPQPPPDPLLLQR	74	2	| nxp:NX_Q86UX7-2 | nxp:NX_Q86UX7-1
AHYGGFTVQNEANKYQISVNK	74	1	| nxp:NX_P02675-1
TISFDIPPQEILTK	74	1	| nxp:NX_P27105-1
VSQTTWDSGFCAVNPK	74	1	| nxp:NX_P31146-1
KKVEAQLQELQVK	74	1	| nxp:NX_P35579-1
VPQVSTPTLVEVSR	74	1	nxp:NX_P02768-1
ARPEDVVNLDLK	73	3	| nxp:NX_Q9HBI1-3 | nxp:NX_Q9HBI1-1 | nxp:NX_Q9HBI1-2
MKPVPDLVPGNFK	73	2	| nxp:NX_P02671-2 | nxp:NX_P02671-1
VTYCPTEPGNYIINIK	73	2	| nxp:NX_P21333-2 | nxp:NX_P21333-1
LLLNNDNLLR	73	2	| nxp:NX_P52907-1 | nxp:NX_P47755-1
CVNTTLQIK	73	2	| nxp:NX_Q01518-2 | nxp:NX_Q01518-1
YAPSGFYIASGDVSGK	73	1	| nxp:NX_O75083-1
VEYVIGR	73	1	| nxp:NX_P00488-1
GGPLDGTYR	73	1	| nxp:NX_P00918-1
KQTALVELVK	73	1	| nxp:NX_P02768-1
EDPAYLHYYDPAGAEDPLGAIHLR	73	1	| nxp:NX_P08567-1
KLQATVQELQK	73	1	| nxp:NX_P31146-1
YAVLYQPLFDK	73	1	| nxp:NX_P55209-1
KIQALQQQADEAEDR	73	1	| nxp:NX_P67936-1
LGAASLGAEDPETQVVLINAVK	73	1	| nxp:NX_Q9Y490-1
HEAFESDLAAHQDR	72	6	| nxp:NX_P12814-1 | nxp:NX_O43707-1 | nxp:NX_P12814-3 | nxp:NX_P35609-1 | nxp:NX_Q08043-1 | nxp:NX_P12814-2
KAPDFVFYAPR	72	4	| nxp:NX_P26038-1 | nxp:NX_P35241-4 | nxp:NX_P35241-5 | nxp:NX_P15311-1
GDFCIQVGR	72	2	| nxp:NX_P15531-2 | nxp:NX_P22392-2
VANPSGNLTETYVQDR	72	2	| nxp:NX_P21333-2 | nxp:NX_P21333-1
VNLAELFK	72	2	| nxp:NX_P30044-1 | nxp:NX_P30044-3
TDKTLVLLM(15.9949)GK	72	1	| nxp:NX_P07737-1
QVTQSYWDTNPTR	72	1	| nxp:NX_P07996-1
LSDGVAVLK	72	1	| nxp:NX_P10809-1
CCSGAIIVLTK	72	1	| nxp:NX_P14618-1
LKDVLLQVDDERR	72	1	| nxp:NX_P35579-1
VAAYDKLEK	72	1	| nxp:NX_P35579-1
NKPEWFFK	72	1	| nxp:NX_P78417-1
LIATFPDTLTYSAYR	71	7	| nxp:NX_P23229-4 | nxp:NX_P23229-2 | nxp:NX_P23229-5 | nxp:NX_P23229-3 | nxp:NX_P23229-9 | nxp:NX_P23229-6 | nxp:NX_P23229-1
DFYFGK	71	4	| nxp:NX_Q15691-1 | nxp:NX_Q15555-4 | nxp:NX_Q15555-3 | nxp:NX_Q15555-1
GSTAPVGGGAFPTIVER	71	2	| nxp:NX_Q15084-1 | nxp:NX_Q15084-2
VFDPQNDKPSK	71	1	| nxp:NX_O15145-1
GTLLALER	71	1	| nxp:NX_P07996-1
DHSGQVFSVVSNGK	71	1	| nxp:NX_P07996-1
SRPSQVLDSPFPTGSAFGF	71	1	| nxp:NX_P08514-1
SGFEPASLK	71	1	| nxp:NX_P35579-1
WQGNDIVVK	71	1	| nxp:NX_Q13418-1
CQLEINFNTLQTK	70	6	| nxp:NX_P12814-1 | nxp:NX_O43707-1 | nxp:NX_P12814-3 | nxp:NX_P35609-1 | nxp:NX_Q08043-1 | nxp:NX_P12814-2
SALTVQFVQGIFVEK	70	4	| nxp:NX_P61224-3 | nxp:NX_P61224-1 | nxp:NX_P61224-2 | nxp:NX_P62834-1
LAILGIHNEVSK	70	3	| nxp:NX_P12814-1 | nxp:NX_P12814-3 | nxp:NX_P12814-2
NVNIQNFHISWK	70	3	| nxp:NX_P12814-1 | nxp:NX_P12814-3 | nxp:NX_P12814-2
LNVAEVTQSEIGQK	70	3	| nxp:NX_Q9HBI1-3 | nxp:NX_Q9HBI1-1 | nxp:NX_Q9HBI1-2
YGFDQFALYK	70	3	| nxp:NX_Q9HCN6-2 | nxp:NX_Q9HCN6-1 | nxp:NX_Q9HCN6-3
M(15.9949)KPVPDLVPGNFK	70	2	| nxp:NX_P02671-1 | nxp:NX_P02671-2
VVVCDNGTGFVK	70	2	| nxp:NX_P61160-1 | nxp:NX_P61160-2
LKECCEKPLLEK	70	1	| nxp:NX_P02768-1
GDVLTIVAVTK	70	1	| nxp:NX_P41240-1
YFDLGLPNR	70	1	| nxp:NX_P48735-1
QSLGELIGTLNAAK	70	1	| nxp:NX_P60174-3
GLTEFVEPIIQIK	70	1	| nxp:NX_Q13201-1
EGTETFADHR	70	1	| nxp:NX_Q9Y490-1
EAIQGGIVR	69	6	| nxp:NX_P16284-5 | nxp:NX_P16284-3 | nxp:NX_P16284-4 | nxp:NX_P16284-2 | nxp:NX_P16284-6 | nxp:NX_P16284-1
GAGTGGLGLAVEGPSEAK	69	2	| nxp:NX_P21333-2 | nxp:NX_P21333-1
GTVEPQLEAR	69	2	| nxp:NX_P21333-2 | nxp:NX_P21333-1
ILEAHQNVAQLSLAEAQLR	69	2	| nxp:NX_Q86UX7-2 | nxp:NX_Q86UX7-1
CLGIPAR	69	1	| nxp:NX_P00488-1
CGPASVQAIK	69	1	| nxp:NX_P00488-1
VTVFPIGIGDR	69	1	| nxp:NX_P04275-1
VVDLLAPYAK	69	1	| nxp:NX_P06576-1
STGGAPTFNVTVTKTDK	69	1	| nxp:NX_P07737-1
HEEAPGHRPTTNPNASK	69	1	| nxp:NX_P21291-1
LLYPPETGLFLVR	69	1	| nxp:NX_P41240-1
VFDKDGNGYISAAELR	69	1	| nxp:NX_P62158-1
FLASVSTVLTSK	69	1	| nxp:NX_P69905-1
QTHLEGALEQEHSR	69	1	| nxp:NX_Q13201-1
PLEGTSFIVDQANRPH	69	1	| nxp:NX_Q15942-1
M(15.9949)ATNAAAQNAIK	69	1	| nxp:NX_Q9Y490-1
EVIQEWNLTNIK	69	1	| nxp:NX_Q9Y490-1
ASIHEAWTDGK	68	4	| nxp:NX_P12814-1 | nxp:NX_O43707-1 | nxp:NX_P12814-3 | nxp:NX_P12814-2
IEINFPAEYPFKPPK	68	3	| nxp:NX_P68036-2 | nxp:NX_P68036-1 | nxp:NX_P68036-3
NILGGTVFR	68	2	| nxp:NX_O75874-1 | nxp:NX_P48735-1
LSPFMADIR	68	2	| nxp:NX_P21333-2 | nxp:NX_P21333-1
LTVPFLLLQGSADR	68	2	| nxp:NX_Q99685-2 | nxp:NX_Q99685-1
GCTDNLTLTVAR	68	1	| nxp:NX_O00151-1
NSVSQISVLSGGK	68	1	| nxp:NX_O15143-1
AHDGGIYAISWSPDSTHLLSASGDK	68	1	| nxp:NX_O75083-1
HQLYIDETVNSNIPTNLR	68	1	| nxp:NX_P02675-1
LTQLNLDR	68	1	| nxp:NX_P07359-1
TPEALLQVR	68	1	| nxp:NX_P14770-1
YTDLVAIQNK	68	1	| nxp:NX_P16109-1
GYGYGQGAGTLSTDK	68	1	| nxp:NX_P21291-1
TVLGTPEVLLGALPGAGGTQR	68	1	| nxp:NX_P40939-1
EAINVEQAFQTIAR	68	1	| nxp:NX_P51149-1
HSLPDIQLLQK	68	1	| nxp:NX_Q13201-1
VYDVLVLK	68	1	| nxp:NX_Q5SQ64-1
ISVYYNEAYGR	68	1	| nxp:NX_Q9H4B7-1
VEHGSVALPAIM(15.9949)R	68	1	| nxp:NX_Q9Y490-1
AVFPSIVGR	67	8	| nxp:NX_P63261-1 | nxp:NX_P63267-1 | nxp:NX_P68133-1 | nxp:NX_P62736-1 | nxp:NX_P68032-1 | nxp:NX_Q6S8J3-1 | nxp:NX_P60709-1 | nxp:NX_A5A3E0-1
GELYCLPCHDK	67	4	| nxp:NX_P48059-4 | nxp:NX_P48059-2 | nxp:NX_P48059-5 | nxp:NX_P48059-3
ATLPDADKER	67	3	| nxp:NX_P12814-1 | nxp:NX_P12814-3 | nxp:NX_P12814-2
LHVDPENFR	67	2	| nxp:NX_P02042-1 | nxp:NX_P68871-1
QVATALQNLQTK	67	2	| nxp:NX_P18206-2 | nxp:NX_P18206-1
VTVLFAGQHIAK	67	2	| nxp:NX_P21333-2 | nxp:NX_P21333-1
LSPFM(15.9949)ADIR	67	2	| nxp:NX_P21333-2 | nxp:NX_P21333-1
DLEAHIDSANK	67	1	| nxp:NX_P35579-1
AVLPLLDAQQPCYLLYR	67	1	| nxp:NX_Q6IBS0-1
EVIQEWNLTNIKR	67	1	| nxp:NX_Q9Y490-1
LLGAAAAIEAAAK	67	1	| nxp:NX_Q9Y490-1
ASVPTIQDQASAM(15.9949)QLSQCAK	67	1	| nxp:NX_Q9Y490-1
DKADFCIIHYAGK	66	5	| nxp:NX_P35579-1 | nxp:NX_P35580-1 | nxp:NX_P35580-2 | nxp:NX_P35580-3 | nxp:NX_P35580-4
NWQWWR	66	5	| nxp:NX_P35579-1 | nxp:NX_P35749-4 | nxp:NX_P35749-3 | nxp:NX_P35749-1 | nxp:NX_P35749-2
DFSPSGIFGAFQR	66	4	| nxp:NX_P56134-4 | nxp:NX_P56134-3 | nxp:NX_P56134-2 | nxp:NX_P56134-1
EQGVLSFWR	66	2	| nxp:NX_P12236-1 | nxp:NX_P05141-1
ALASIDSK	66	2	| nxp:NX_P18206-2 | nxp:NX_P18206-1
SFLDSGYR	66	2	| nxp:NX_P18206-2 | nxp:NX_P18206-1
EGVLYVGSK	66	2	| nxp:NX_P37840-2 | nxp:NX_P37840-1
FVSISDLLVPK	66	2	| nxp:NX_P50395-2 | nxp:NX_P50395-1
GEDFYCVTCHETK	66	2	| nxp:NX_Q13642-5 | nxp:NX_Q13642-4
VVPDVNVSGQK	66	2	| nxp:NX_Q86UX7-2 | nxp:NX_Q86UX7-1
TSLEVSPNPEPPEKPVR	66	2	| nxp:NX_Q9UBW5-2 | nxp:NX_Q9UBW5-1
GIQNDLTK	66	1	| nxp:NX_O95810-1
DHINLPGFSGQNPLR	66	1	| nxp:NX_P00491-1
DKLPQPVQPDPVSHCK	66	1	| nxp:NX_P05556-1
GVLQGHLESSR	66	1	| nxp:NX_P07359-1
DNCPFHYNPAQYDYDR	66	1	| nxp:NX_P07996-1
HELQANCYEEVK	66	1	| nxp:NX_P23528-1
DGGLICTSCR	66	1	| nxp:NX_P31146-1
AAVATFLQSVQVPEFTPK	66	1	nxp:NX_P22314-1
IREEYPDR	65	6	| nxp:NX_A6NKZ8-1 | nxp:NX_P07437-1 | nxp:NX_Q9H4B7-1 | nxp:NX_A6NNZ2-1 | nxp:NX_Q3ZCM7-1 | nxp:NX_P68371-1
VSHVSTGGGASLELLEGK	65	2	| nxp:NX_P00558-1 | nxp:NX_P07205-1
LGDVYVNDAFGTAHR	65	2	| nxp:NX_P00558-1 | nxp:NX_P07205-1
VVAGVANALAHK	65	2	| nxp:NX_P02042-1 | nxp:NX_P68871-1
TLAQLNPESSLFIIASK	65	2	| nxp:NX_P06744-1 | nxp:NX_P06744-2
HVLVTLGEK	65	2	| nxp:NX_P60660-1 | nxp:NX_P60660-2
FVFHQEQVYCPDCAK	65	2	| nxp:NX_Q13642-5 | nxp:NX_Q13642-4
VHLQLWDTAGQER	65	1	| nxp:NX_O00194-1
GPHALGAPSLLLTGTQLYGR	65	1	| nxp:NX_P08514-1
EFNPLVIVGLSK	65	1	| nxp:NX_P12259-1
NLDSTTVAVHGEEIYCK	65	1	| nxp:NX_P21291-1
VVFVFGPDKK	65	1	| nxp:NX_P30041-1
TFHFNTVEEVHSR	65	1	| nxp:NX_P30740-1
LQATVQELQK	65	1	| nxp:NX_P31146-1
ITDVIIGFQACCR	65	1	| nxp:NX_P35579-1
LAFLNVQAAEEALPR	65	1	| nxp:NX_P43304-1
VKQELLEEVKK	65	1	| nxp:NX_P50552-1
VKEEIIEAFVQELR	65	1	| nxp:NX_P50552-1
IISSIEQK	65	1	| nxp:NX_P62258-1
IQYQLVDISQDNALR	65	1	| nxp:NX_Q9H299-1
IGNNTAIQEIFNR	65	1	| nxp:NX_Q9H4B7-1
AVCM(15.9949)LSNTTAIAEAWAR	64	7	| nxp:NX_P68366-1 | nxp:NX_Q9NY65-1 | nxp:NX_Q71U36-1 | nxp:NX_P68363-1 | nxp:NX_Q13748-1 | nxp:NX_Q13748-2 | nxp:NX_Q6PEY2-1
CHAIIDEQPLIFK	64	4	| nxp:NX_P48059-4 | nxp:NX_P48059-2 | nxp:NX_P48059-5 | nxp:NX_P48059-3
AGCAVTSLLASELTK	64	3	| nxp:NX_O60610-2 | nxp:NX_O60610-3 | nxp:NX_O60610-1
DQALTEEHAR	64	3	| nxp:NX_P12814-1 | nxp:NX_P12814-3 | nxp:NX_P12814-2
TPITVVK	64	2	| nxp:NX_P06396-3 | nxp:NX_P06396-1
VQVQDNEGCPVEALVK	64	2	| nxp:NX_P21333-2 | nxp:NX_P21333-1
VTYTPM(15.9949)APGSYLISIK	64	2	| nxp:NX_P21333-2 | nxp:NX_P21333-1
TGEAIVDAALSALR	64	2	| nxp:NX_Q15084-1 | nxp:NX_Q15084-2
LSGSNPYTTVTPQIINSK	64	1	| nxp:NX_O43707-1
LTQAQIFDYGEIPNFPR	64	1	| nxp:NX_P00491-1
GVVPLAGTNGETTTQGLDGLSER	64	1	| nxp:NX_P04075-2
RPTELLSNPQFIVDGATR	64	1	| nxp:NX_P07384-1
KDNCPNLPNSGQEDYDK	64	1	| nxp:NX_P07996-1
SQHLDNFSNQIGK	64	1	| nxp:NX_P12259-1
CSNPAVVFVTR	64	1	| nxp:NX_P13501-1
GHGLTALPALPAR	64	1	| nxp:NX_P14770-1
ASGFIHEDHLR	64	1	| nxp:NX_P24844-1
QRYEILTPNSIPK	64	1	| nxp:NX_P35579-1
WLPAGTGPQAF	64	1	| nxp:NX_P50552-1
VEILCEHPR	64	1	| nxp:NX_Q3ZCW2-1
HSSLIDIDSVPTYK	64	1	| nxp:NX_Q7LDG7-2
KAGTQIENIEEDFR	63	5	| nxp:NX_P12814-1 | nxp:NX_P35609-1 | nxp:NX_Q08043-1 | nxp:NX_P12814-3 | nxp:NX_P12814-2
DGLAFNALIHR	63	4	| nxp:NX_O43707-1 | nxp:NX_Q9H254-2 | nxp:NX_Q9H254-4 | nxp:NX_Q9H254-1
DQLIYNLLK	63	2	| nxp:NX_P00338-3 | nxp:NX_P00338-4
GGSTSYGTGSETESPR	63	2	| nxp:NX_P02671-2 | nxp:NX_P02671-1
VADFGLAR	63	2	| nxp:NX_P12931-1 | nxp:NX_P12931-2
ELLPVLISAMK	63	2	| nxp:NX_P18206-2 | nxp:NX_P18206-1
VHSPSGALEECYVTEIDQDK	63	2	| nxp:NX_P21333-2 | nxp:NX_P21333-1
GKLDVQFSGLTK	63	2	| nxp:NX_P21333-2 | nxp:NX_P21333-1
FEQSASNFYQQQAEGHK	63	2	| nxp:NX_Q9UBW5-2 | nxp:NX_Q9UBW5-1
YGIPYFETSAATGQNVEK	63	1	| nxp:NX_O00194-1
LHIVQVVCK	63	1	| nxp:NX_O00299-1
LYSILGTTLKDEGK	63	1	| nxp:NX_O75083-1
LEGWLSLPVR	63	1	| nxp:NX_O75116-1
HVYGELDVQIQR	63	1	| nxp:NX_P00488-1
HRPQVAIICGSGLGGLTDK	63	1	| nxp:NX_P00491-1
LVNANGEAVYCK	63	1	| nxp:NX_P04040-1
YCRDEIESVK	63	1	| nxp:NX_P05106-1
CLQSGTLFR	63	1	| nxp:NX_P07384-1
NAFACFDEEASGFIHEDHLR	63	1	| nxp:NX_P24844-1
FIQENIFGICPH	63	1	| nxp:NX_P30101-1
HSQAVEELAEQLEQTK	63	1	| nxp:NX_P35579-1
LKDVLLQVDDER	63	1	| nxp:NX_P35579-1
NSQSFFSGLFGGSSK	63	1	| nxp:NX_P54920-1
YSYVCPDLVK	63	1	| nxp:NX_P61158-1
IIPGFMCQGGDFTR	63	1	| nxp:NX_P62937-1
ATISNDGATILK	63	1	| nxp:NX_Q99832-1
EIVHIQIGQCGNQIGAK	63	1	| nxp:NX_Q9H4B7-1
LAGTQPLEVLEAVQR	63	1	nxp:NX_P22314-1
HFSVTAEGGLSPAQVTGAR	62	7	| nxp:NX_Q93084-4 | nxp:NX_Q93084-2 | nxp:NX_Q93084-3 | nxp:NX_Q93084-7 | nxp:NX_Q93084-1 | nxp:NX_Q93084-6 | nxp:NX_Q93084-5
DILLRPELEELR	62	2	| nxp:NX_P00387-1 | nxp:NX_P00387-3
QITVNDLPVGR	62	2	| nxp:NX_P32119-1 | nxp:NX_Q06830-1
TAASGVEANSRPLDH	62	1	| nxp:NX_O00151-1
NIDNPALADIYTEHAHQVVVAK	62	1	| nxp:NX_O75083-1
TKDGVVEITGK	62	1	| nxp:NX_P04792-1
HIADLAGNSEVILPVPAFNVINGGSHAGNK	62	1	| nxp:NX_P06733-1
HNPDQLDSDSDR	62	1	| nxp:NX_P07996-1
DAGPLLISLK	62	1	| nxp:NX_P31146-1
QHLGLVGGEEPPR	62	1	| nxp:NX_P40197-1
VMVTNVTSLLK	62	1	| nxp:NX_Q9Y490-1
VIFLENYR	61	5	| nxp:NX_P06737-2 | nxp:NX_P11216-1 | nxp:NX_P06737-1 | nxp:NX_P11217-1 | nxp:NX_P11217-2
KLVILEGELER	61	4	| nxp:NX_P67936-1 | nxp:NX_P07951-2 | nxp:NX_P67936-2 | nxp:NX_P07951-1
QVTVLELFR	61	3	| nxp:NX_P11169-1 | nxp:NX_Q8TDB8-2 | nxp:NX_Q8TDB8-1
KDDPLTNLNTAFDVAEK	61	3	| nxp:NX_P12814-1 | nxp:NX_P12814-3 | nxp:NX_P12814-2
NTNDANSCQIIIPQNQVNR	61	3	| nxp:NX_P50395-2 | nxp:NX_P50395-1 | nxp:NX_P31150-1
GAVGALLVYDIAK	61	3	| nxp:NX_P62491-2 | nxp:NX_P62491-1 | nxp:NX_Q15907-1
VHLVGIDIFTGK	61	3	| nxp:NX_Q6IS14-1 | nxp:NX_P63241-2 | nxp:NX_Q9GZV4-1
AQPVQVAEGSEPDGFWEALGGK	61	2	| nxp:NX_P06396-3 | nxp:NX_P06396-1
ALEGLQYPFAVTSYGK	61	2	| nxp:NX_P14543-2 | nxp:NX_P14543-1
DGPALSGPQSR	61	2	| nxp:NX_P19971-1 | nxp:NX_P19971-2
LIALLEVLSQKK	61	2	| nxp:NX_P21333-2 | nxp:NX_P21333-1
TVEGAGSIAAATGFVK	61	2	| nxp:NX_P37840-2 | nxp:NX_P37840-1
VTGESHIGGVLLK	61	2	| nxp:NX_Q86UX7-2 | nxp:NX_Q86UX7-1
ASFSQPLFQAVAAICR	61	2	| nxp:NX_Q86UX7-2 | nxp:NX_Q86UX7-1
HPECYVCTDCGTNLK	61	1	| nxp:NX_O00151-1
LYSILGTTLK	61	1	| nxp:NX_O75083-1
ANHEEVLAAGK	61	1	| nxp:NX_P00491-1
DYRPSQQDECSPR	61	1	| nxp:NX_P05106-1
SFQTGLFTAAR	61	1	| nxp:NX_P07225-1
TLPPGLLTPTPK	61	1	| nxp:NX_P07359-1
EVPDACFNHNGEHR	61	1	| nxp:NX_P07996-1
IYVENDFSWDKR	61	1	| nxp:NX_P08514-1
NQTAEKEEFEHQQK	61	1	| nxp:NX_P11142-1
NIIHGSDSVESAEK	61	1	| nxp:NX_P15531-2
VLSIGDGIAR	61	1	| nxp:NX_P25705-1
LQQELDDLLVDLDHQR	61	1	| nxp:NX_P35579-1
EQEVNILKK	61	1	| nxp:NX_P35579-1
LEVNLQAM(15.9949)K	61	1	| nxp:NX_P35579-1
TIIPLISQCTPK	61	1	| nxp:NX_P40926-1
DCGATWVVLGHSER	61	1	| nxp:NX_P60174-3
FSPGAPGGSGSQPNQK	61	1	| nxp:NX_Q15942-1
HNELTGDNVGPLILK	61	1	| nxp:NX_Q8N5K1-1
CDLISIPK	61	1	| nxp:NX_Q9ULV4-1
AAGHPGDPESQQR	61	1	| nxp:NX_Q9Y490-1
QKDYETATLSEIK	60	3	| nxp:NX_P12814-1 | nxp:NX_P12814-3 | nxp:NX_P12814-2
CVLIFGVPSR	60	2	| nxp:NX_P13716-1 | nxp:NX_P13716-2
HGAGAEISTVNPEQYSK	60	2	| nxp:NX_P48426-1 | nxp:NX_P78356-1
LSDLLAPISEQIK	60	2	| nxp:NX_Q01518-2 | nxp:NX_Q01518-1
KEPAVLELEGK	60	2	| nxp:NX_Q01518-2 | nxp:NX_Q01518-1
TVAAPSVFIFPPSDEQLK	60	1	| nxp:NX_P01834-1
REEAPSLRPAPPPISGGGYR	60	1	| nxp:NX_P02675-1
VHTECCHGDLLECADDR	60	1	| nxp:NX_P02768-1
FKDLGEENFK	60	1	| nxp:NX_P02768-1
KICLDLQAPLYK	60	1	| nxp:NX_P02776-1
DPILFPSFIHSQK	60	1	| nxp:NX_P04040-1
VLEDRPLSDKGSGDSSQVTQVSPQR	60	1	| nxp:NX_P05106-1
SAVTTVVNPK	60	1	| nxp:NX_P05556-1
DVPIQSVFTR	60	1	| nxp:NX_P07996-1
VLLLGSQQAGTTL	60	1	| nxp:NX_P08514-1
HELQANCYEEVKDR	60	1	| nxp:NX_P23528-1
KEDLVFIFWAPESAPLK	60	1	| nxp:NX_P23528-1
STFVLDEFKR	60	1	| nxp:NX_P26641-1
KPEDWDERPK	60	1	| nxp:NX_P27824-1
TPELNLDQFHDK	60	1	| nxp:NX_P27824-1
GHIISDGGCTCPGDVAK	60	1	| nxp:NX_P36959-1
EKAEGDVAALNR	60	1	| nxp:NX_P67936-1
LNECVDHTPK	60	1	| nxp:NX_P78417-1
SLPGSLANVVK	60	1	| nxp:NX_Q13201-1
EVHEQLLSTEQVSDQK	60	1	| nxp:NX_Q13201-1
LNENHSGELWK	60	1	| nxp:NX_Q13418-1
LGHPEALSAGTGSPQPPSFTYAQQR	60	1	| nxp:NX_Q15942-1
GLPDNISSVLNK	60	1	| nxp:NX_Q16851-1
HQTLQGLAFPLQPEAQR	60	1	| nxp:NX_Q6IBS0-1
QLALWNPK	60	1	| nxp:NX_Q9ULV4-1
NGSLICTASK	60	1	| nxp:NX_Q9ULV4-1
AAAGLNQAATELVQASR	60	1	| nxp:NX_Q9Y490-1
AVGVAVATGLHTELGK	59	7	| nxp:NX_Q93084-4 | nxp:NX_Q93084-2 | nxp:NX_Q93084-3 | nxp:NX_Q93084-7 | nxp:NX_Q93084-1 | nxp:NX_Q93084-6 | nxp:NX_Q93084-5
GYEEWLLNEIR	59	5	| nxp:NX_P12814-1 | nxp:NX_O43707-1 | nxp:NX_P12814-3 | nxp:NX_P35609-1 | nxp:NX_P12814-2
ALIFDNK	59	4	| nxp:NX_P12814-1 | nxp:NX_O43707-1 | nxp:NX_P12814-3 | nxp:NX_P12814-2
AVFVDLEPTVIDEVR	59	3	| nxp:NX_Q9BQE3-1 | nxp:NX_Q71U36-1 | nxp:NX_P68363-1
YKAEDEVQR	59	2	| nxp:NX_P08107-1 | nxp:NX_P34931-1
ALGALVDSCAPGLCPDWDSWDASKPVTNAR	59	2	| nxp:NX_P21333-2 | nxp:NX_P21333-1
ALEHFTDLYDIK	59	2	| nxp:NX_Q00610-2 | nxp:NX_Q00610-1
NLEGYVGFANLPNQVYR	59	2	| nxp:NX_Q16181-2 | nxp:NX_Q16181-1
LPAQLAWEALEQR	59	2	| nxp:NX_Q70J99-1 | nxp:NX_Q70J99-3
QFASQANVVGPWIQTK	59	1	| nxp:NX_O43707-1
FLNVTSVHLFK	59	1	| nxp:NX_P00488-1
KETFDVTLEPLSFK	59	1	| nxp:NX_P00488-1
AENGKLVINGNPITIFQER	59	1	| nxp:NX_P04406-1
GECLCGQCVCH	59	1	| nxp:NX_P05106-1
SFTIKPVGF	59	1	| nxp:NX_P05106-1
LIAPVAEEEATVPNNK	59	1	| nxp:NX_P07195-1
GLGELQELYLK	59	1	| nxp:NX_P07359-1
VASHLEVNCDK	59	1	| nxp:NX_P07359-1
CTSYPDGSWK	59	1	| nxp:NX_P07996-1
TFDSSCHFFATK	59	1	| nxp:NX_P09486-1
VFEHDSVELNCK	59	1	| nxp:NX_P10768-1
DIHSGLIGPLLICQK	59	1	| nxp:NX_P12259-1
HEQNIDCGGGYVK	59	1	| nxp:NX_P27797-1
HNSSGSILFLGR	59	1	| nxp:NX_P30740-1
IFGVTTLDIVR	59	1	| nxp:NX_P40926-1
IEGLLAAFPK	59	1	| nxp:NX_P48444-1
LFVTNDAATILR	59	1	| nxp:NX_P50990-1
AIANECQANFISIK	59	1	| nxp:NX_P55072-1
HVFGESDELIGQK	59	1	| nxp:NX_P60174-3
KELEEDFIK	59	1	| nxp:NX_Q14019-1
LDHVLLTLQKPSPELK	59	1	| nxp:NX_Q9Y490-1
KVLEEEEQR	58	6	| nxp:NX_Q05682-5 | nxp:NX_Q05682-4 | nxp:NX_Q05682-3 | nxp:NX_Q05682-6 | nxp:NX_Q05682-2 | nxp:NX_Q05682-1
GSAASTCILTIESK	58	3	| nxp:NX_Q0ZGT2-4 | nxp:NX_Q0ZGT2-1 | nxp:NX_Q0ZGT2-3
YEEQRPSLK	58	3	| nxp:NX_Q0ZGT2-4 | nxp:NX_Q0ZGT2-1 | nxp:NX_Q0ZGT2-3
SADTLWGIQK	58	2	| nxp:NX_P00338-3 | nxp:NX_P00338-4
HPDEAAFFDTASTGK	58	2	| nxp:NX_P02671-2 | nxp:NX_P02671-1
LQFHDVAGDIFHQQCK	58	2	| nxp:NX_P11413-3 | nxp:NX_P11413-2
LLLQVQHASK	58	2	| nxp:NX_P12236-1 | nxp:NX_P05141-1
CSGPGLSPGM(15.9949)VR	58	2	| nxp:NX_P21333-2 | nxp:NX_P21333-1
LLADPTGAFGK	58	2	| nxp:NX_P30044-1 | nxp:NX_P30044-3
HHCPNTPIILVGTK	58	2	| nxp:NX_P63000-1 | nxp:NX_P63000-2
LKDSEAELQR	58	2	| nxp:NX_Q16181-2 | nxp:NX_Q16181-1
VWSPLVTEEGKR	58	1	| nxp:NX_O00151-1
QSTSFLVLQEILESEEK	58	1	| nxp:NX_O00151-1
NTAEWLLSHTK	58	1	| nxp:NX_P00491-1
ITLPVDFVTADKFDENAK	58	1	| nxp:NX_P00558-1
RHPDYSVVLLLR	58	1	| nxp:NX_P02768-1
CCAAADPHECYAK	58	1	| nxp:NX_P02768-1
LYELIITR	58	1	| nxp:NX_P07384-1
DFFLANASR	58	1	| nxp:NX_P07384-1
PVIDNPNYK	58	1	| nxp:NX_P27824-1
HSQAVEELAEQLEQTKR	58	1	| nxp:NX_P35579-1
VISGVLQLGNIVFK	58	1	| nxp:NX_P35579-1
ERIPEAPAGPPSDFGLFLSDDDPKK	58	1	| nxp:NX_Q9Y490-1
LQQEATEHATESEER	58	1	| nxp:NX_Q9Y6C2-1
VTHAVVTVPAYFNDAQR	58	1	nxp:NX_P11021-1
ASFNHFDR	57	5	| nxp:NX_P12814-1 | nxp:NX_P35609-1 | nxp:NX_Q08043-1 | nxp:NX_P12814-3 | nxp:NX_P12814-2
GHYTEGAELVDSVLDVVR	57	3	| nxp:NX_P07437-1 | nxp:NX_P68371-1 | nxp:NX_Q13509-1
THEAEIVEGENHTY	57	2	| nxp:NX_P21333-2 | nxp:NX_P21333-1
VTYTPMAPGSYLISIK	57	2	| nxp:NX_P21333-2 | nxp:NX_P21333-1
EAGAGGLAIAVEGPSK	57	2	| nxp:NX_P21333-2 | nxp:NX_P21333-1
VDLGVLGK	57	2	| nxp:NX_P36871-1 | nxp:NX_P36871-2
TKEQVTNVGGAVVTGVTAVAQK	57	2	| nxp:NX_P37840-2 | nxp:NX_P37840-1
YSEKEDKYEEEIK	57	2	| nxp:NX_P67936-1 | nxp:NX_P67936-2
VIQCFAETGQVQK	57	2	| nxp:NX_Q00610-2 | nxp:NX_Q00610-1
KEPAVLELEGKK	57	2	| nxp:NX_Q01518-2 | nxp:NX_Q01518-1
TVPLAGHVGFDSLPDQLVNK	57	2	| nxp:NX_Q14141-4 | nxp:NX_Q14141-1
NNPAGLYSSENISNFNNALESK	57	1	| nxp:NX_O00151-1
VITNQYNNPAGLYSSENISNFNNALESK	57	1	| nxp:NX_O00151-1
IVPNVLLEQGK	57	1	| nxp:NX_O75390-1
HVGDLGNVTADK	57	1	| nxp:NX_P00441-1
VKEEVFIQQR	57	1	| nxp:NX_P04275-1
GALQNIIPASTGAAK	57	1	| nxp:NX_P04406-1
VSLDVNHFAPDELTVK	57	1	| nxp:NX_P04792-1
HNQLPLVIEFTEQTAPK	57	1	| nxp:NX_P07237-1
YKPESEELTAER	57	1	| nxp:NX_P07237-1
LCNNPTPQFGGK	57	1	| nxp:NX_P07996-1
AFLASPEYVNLPINGNGKQ	57	1	| nxp:NX_P09211-1
LAPITYPQGLALAK	57	1	| nxp:NX_P15153-1
SIAPGAFDR	57	1	| nxp:NX_P40197-1
IHYLDTTTLIEPAPR	57	1	| nxp:NX_P46109-1
EGAAHAFAQYNLDQFTPVK	57	1	| nxp:NX_P47755-1
IIHGSGYSDEDKR	57	1	| nxp:NX_P50148-1
LGITHVLNAAEGR	57	1	| nxp:NX_P51452-1
LRVDPVNFK	57	1	| nxp:NX_P69905-1
SIKDTICNQDER	57	1	| nxp:NX_Q9ULV4-1
SNTSPEELGPLANQLTSDYGR	57	1	| nxp:NX_Q9Y490-1
APGQLECETAIAALNSCLR	57	1	| nxp:NX_Q9Y490-1
LVTDLTK	57	1	nxp:NX_P02768-1
LASDLLEWIR	56	4	| nxp:NX_P12814-1 | nxp:NX_O43707-1 | nxp:NX_P12814-3 | nxp:NX_P12814-2
VAGQDGSVVQFK	56	4	| nxp:NX_P61956-2 | nxp:NX_P61956-1 | nxp:NX_Q6EEV6-1 | nxp:NX_P55854-1
ICDQWDNLGALTQK	56	3	| nxp:NX_P12814-1 | nxp:NX_P12814-3 | nxp:NX_P12814-2
LLETIDQLYLEYAK	56	3	| nxp:NX_P12814-1 | nxp:NX_P12814-3 | nxp:NX_P12814-2
AGTQIENIEEDFRDGLK	56	3	| nxp:NX_P12814-1 | nxp:NX_P12814-3 | nxp:NX_P12814-2
IHLISTQSAIPYALR	56	2	| nxp:NX_P02679-2 | nxp:NX_P02679-1
SAGQGEVLVYVEDPAGHQEEAK	56	2	| nxp:NX_P21333-2 | nxp:NX_P21333-1
APGPGPADASK	56	2	| nxp:NX_P21333-2 | nxp:NX_P21333-1
TSSVFVDSLTK	56	2	| nxp:NX_P21333-2 | nxp:NX_P21333-1
IVGPSGAAVPCK	56	2	| nxp:NX_P21333-2 | nxp:NX_P21333-1
ISSDLDGHPVPK	56	2	| nxp:NX_P29401-1 | nxp:NX_P29401-2
IVLDNSVFSEHR	56	2	| nxp:NX_Q00610-2 | nxp:NX_Q00610-1
GFTIPEAFR	56	1	| nxp:NX_O00299-1
NYCGLPGEYWLGNDK	56	1	| nxp:NX_P02675-1
ECCEKPLLEK	56	1	| nxp:NX_P02768-1
FCENPDEVKR	56	1	| nxp:NX_P12259-1
IDATSASVLASR	56	1	| nxp:NX_P13667-1
HLSVNDLPVGR	56	1	| nxp:NX_P30048-1
SDGVYTGLSTR	56	1	| nxp:NX_P30273-1
RLPPQQIEK	56	1	| nxp:NX_P47756-2
FVLVQENRPTLTDIVELR	56	1	| nxp:NX_Q13201-1
IHFPLVTYAPIISAEK	56	1	| nxp:NX_Q9NY65-1
AVEGCVSASQAATEDGQLLR	56	1	| nxp:NX_Q9Y490-1
LESAGGLIQTAR	56	1	| nxp:NX_Q9Y490-1
YM(15.9949)ACCLLYR	55	4	| nxp:NX_P68366-1 | nxp:NX_Q9BQE3-1 | nxp:NX_Q71U36-1 | nxp:NX_P68363-1
VTTVASHTSDSDVPSGVTEVVVK	55	2	| nxp:NX_P10909-5 | nxp:NX_P10909-2
CDRVDQLTAQLADLAAR	55	2	| nxp:NX_P18206-2 | nxp:NX_P18206-1
FGNDVQHFK	55	2	| nxp:NX_P62993-2 | nxp:NX_P62993-1
LHIIEVGTPPTGNQPFPK	55	2	| nxp:NX_Q00610-2 | nxp:NX_Q00610-1
LGELTDLHGLR	55	2	| nxp:NX_Q70J99-1 | nxp:NX_Q70J99-3
DNTINLIHTFR	55	1	| nxp:NX_O15144-1
TVSCNIPVVSGK	55	1	| nxp:NX_P02675-1
SNGLICGGNGVCK	55	1	| nxp:NX_P05556-1
VALTGLTVAEYFR	55	1	| nxp:NX_P06576-1
AEGGQCPSLLFDLR	55	1	| nxp:NX_P08514-1
SRPSQVLDSPFPTGSAFGFSLR	55	1	| nxp:NX_P08514-1
LEAGDHPVELLAR	55	1	| nxp:NX_P09486-1
GLESTTLADKDGEIYCK	55	1	| nxp:NX_P21291-1
NTLLIAGLQAR	55	1	| nxp:NX_P39656-1
GKLDGNQDLIR	55	1	| nxp:NX_P48735-1
SCLLHQFTEK	55	1	| nxp:NX_P61106-1
VNHVTLSQPK	55	1	| nxp:NX_P61769-1
VCENIPIVLCGNK	55	1	| nxp:NX_P62826-1
LKEVHEQLLSTEQVSDQK	55	1	| nxp:NX_Q13201-1
SEVAAENHLR	55	1	| nxp:NX_Q14554-1
LANILFTQELAR	55	1	| nxp:NX_Q8TC12-1
AGSPSPQPSGELPR	55	1	| nxp:NX_Q92619-1
LVNLQHLDLLNNK	55	1	| nxp:NX_Q96AG4-1
HESESCDCLQGFQIVH	55	1	| nxp:NX_Q9H4B7-1
VSHVLAALQAGNR	55	1	| nxp:NX_Q9Y490-1
LDTVAGGLQGLR	55	1	| nxp:NX_Q9Y6C2-1
IINEPTAAAIAYGLDKR	55	1	nxp:NX_P11021-1
NTNPNFVR	54	5	| nxp:NX_P35579-1 | nxp:NX_P35580-1 | nxp:NX_P35580-2 | nxp:NX_P35580-3 | nxp:NX_P35580-4
LSNRPAFMPSEGR	54	3	| nxp:NX_P12814-1 | nxp:NX_P12814-3 | nxp:NX_P12814-2
SDKDLETQVIQLNEQVHSLK	54	3	| nxp:NX_Q15555-3 | nxp:NX_Q15555-1 | nxp:NX_Q15555-4
SLITFVNK	54	3	| nxp:NX_Q9HBI1-3 | nxp:NX_Q9HBI1-1 | nxp:NX_Q9HBI1-2
VQHIQLLQK	54	2	| nxp:NX_P02671-2 | nxp:NX_P02671-1
EPGLQIWR	54	2	| nxp:NX_P06396-3 | nxp:NX_P06396-1
VTYDGVPVPGSPFPLEAVAPTKPSK	54	2	| nxp:NX_P21333-2 | nxp:NX_P21333-1
DAPQDFHPDR	54	2	| nxp:NX_P21333-2 | nxp:NX_P21333-1
SGGASHSELIHNLR	54	2	| nxp:NX_P22061-1 | nxp:NX_P22061-2
NLEQLGGTVTNPGGSGTSSR	54	2	| nxp:NX_Q15833-2 | nxp:NX_Q15833-1
QHWVVFK	54	2	| nxp:NX_Q86UX7-2 | nxp:NX_Q86UX7-1
KPLNTEGVM(15.9949)K	54	1	| nxp:NX_P00488-1
VEQHVELYQK	54	1	| nxp:NX_P01137-1
YLSDHSFLVSQGDR	54	1	| nxp:NX_P04275-1
CPTCPDACTFKK	54	1	| nxp:NX_P05106-1
VLEDRPLSDK	54	1	| nxp:NX_P05106-1
SCNCLLLK	54	1	| nxp:NX_P06733-1
THILLFLPK	54	1	| nxp:NX_P07237-1
TGNCVIDWLVSNQSVR	54	1	| nxp:NX_P08567-1
ALPGQLKPFETLLSQNQGGK	54	1	| nxp:NX_P09211-1
LSEGASYLDHTFPAEK	54	1	| nxp:NX_P12259-1
SILFVPTSAPR	54	1	| nxp:NX_P14625-1
STVAQLVK	54	1	| nxp:NX_P25705-1
EQLEEEEEAKHNLEK	54	1	| nxp:NX_P35579-1
VQIYHNPTANSFR	54	1	| nxp:NX_P50552-1
YVECSALTQK	54	1	| nxp:NX_P60953-2
STYNHLSSWLTDAR	54	1	| nxp:NX_P61106-1
QEPVKPEEGR	54	1	| nxp:NX_P61586-1
AYSEAHEISK	54	1	| nxp:NX_P61981-1
SVTEQGAELSNEER	54	1	| nxp:NX_P63104-1
GIVDQSQQAYQEAFEISK	54	1	| nxp:NX_P63104-1
IQALQQQADEAEDR	54	1	| nxp:NX_P67936-1
VALEGLRPTIPPGISPHVCK	54	1	| nxp:NX_Q13418-1
APLVLKD	54	1	| nxp:NX_Q99497-1
GAELIENVLEVVR	54	1	| nxp:NX_Q9H4B7-1
AIAVTVQEM(15.9949)VTK	54	1	| nxp:NX_Q9Y490-1
TEAPLNPK	53	8	| nxp:NX_P63261-1 | nxp:NX_Q562R1-1 | nxp:NX_P63267-1 | nxp:NX_P68133-1 | nxp:NX_P62736-1 | nxp:NX_P68032-1 | nxp:NX_Q6S8J3-1 | nxp:NX_P60709-1
VVDLLYWR	53	4	| nxp:NX_Q9NQC3-3 | nxp:NX_Q9NQC3-2 | nxp:NX_Q9NQC3-5 | nxp:NX_Q9NQC3-1
TLHPDLGTDK	53	2	| nxp:NX_P00338-3 | nxp:NX_P00338-4
TIESILEPVAQQISH	53	2	| nxp:NX_P18206-2 | nxp:NX_P18206-1
AVAQALEVIPR	53	2	| nxp:NX_P49368-2 | nxp:NX_P49368-1
YGLFPANYVELR	53	2	| nxp:NX_Q14247-3 | nxp:NX_Q14247-1
HHSLGGQYGVQGFPTIK	53	2	| nxp:NX_Q15084-1 | nxp:NX_Q15084-2
DPAPTASSQAAVSAR	53	2	| nxp:NX_Q15833-2 | nxp:NX_Q15833-1
LREDENAEPVGTTYQK	53	2	| nxp:NX_Q16643-1 | nxp:NX_Q16643-2
ELQNTVANLHVR	53	1	| nxp:NX_O15127-1
DNSQVNAVTVLTLLDK	53	1	| nxp:NX_O95810-1
KPLNTEGVMK	53	1	| nxp:NX_P00488-1
NVWVHLDGPGVTR	53	1	| nxp:NX_P00488-1
KAPDAGGCLHADPDLGVLCPTGCQLQE	53	1	| nxp:NX_P02675-1
GLVVLGFPCNQFGHQENAK	53	1	| nxp:NX_P07203-1
AAVEEGIVLGGGCALLR	53	1	| nxp:NX_P10809-1
VGEVIVTK	53	1	| nxp:NX_P10809-1
WNDEHCLK	53	1	| nxp:NX_P16109-1
AKIDDPTDSKPEDWDKPEHIPDPDAK	53	1	| nxp:NX_P27797-1
QEELAAAER	53	1	| nxp:NX_P35579-1
TPFLLVGTQIDLR	53	1	| nxp:NX_P60953-2
NIEEHASADVEK	53	1	| nxp:NX_P61006-1
IANPVEGSSGR	53	1	| nxp:NX_Q15365-1
HLSSCAAPAPLTSAER	53	1	| nxp:NX_Q6IBS0-1
DSSGQHVDVSPTSQR	53	1	| nxp:NX_Q99798-1
ASSLIEEAKK	53	1	| nxp:NX_Q9Y490-1
GIWLEAGK	53	1	| nxp:NX_Q9Y490-1
HQAQIDHYLGLANK	52	4	| nxp:NX_Q9NQC3-3 | nxp:NX_Q9NQC3-2 | nxp:NX_Q9NQC3-5 | nxp:NX_Q9NQC3-1
ALPFWNEEIVPQIK	52	3	| nxp:NX_P18669-1 | nxp:NX_P15259-1 | nxp:NX_Q8N0Y7-1
LTIGEGQQHHLGGAK	52	2	| nxp:NX_P02679-2 | nxp:NX_P02679-1
VWYVSNIDGTHIAK	52	2	| nxp:NX_P06744-1 | nxp:NX_P06744-2
SLTNDWEDHLAVK	52	2	| nxp:NX_P08238-1 | nxp:NX_P07900-2
NTGIICTIGPASR	52	2	| nxp:NX_P14618-1 | nxp:NX_P14618-2
TGVELGKPTHF	52	2	| nxp:NX_P21333-2 | nxp:NX_P21333-1
VEPGLGADNSVVR	52	2	| nxp:NX_P21333-2 | nxp:NX_P21333-1
YGPDAFFNFPGK	52	2	| nxp:NX_P50851-2 | nxp:NX_P50851-1
GPDASAEGLNPYGLVAPR	52	2	| nxp:NX_Q86UX7-2 | nxp:NX_Q86UX7-1
TGASFQQAQEEFSQGIFSSR	52	1	| nxp:NX_O15127-1
GPVTDVAYSHDGAFLAVCDASK	52	1	| nxp:NX_O75083-1
LKDEEISAAAIK	52	1	| nxp:NX_O75116-1
CPTCPDACTFK	52	1	| nxp:NX_P05106-1
VASHLEVNCDKR	52	1	| nxp:NX_P07359-1
TFVNITPAEVGVLVGKDR	52	1	| nxp:NX_P07737-1
QHVVSVEEALLATGQWK	52	1	| nxp:NX_P07996-1
CENTDPGYNCLPCPPR	52	1	| nxp:NX_P07996-1
YIPPCLDSELTEFPLR	52	1	| nxp:NX_P09486-1
SQIHDIVLVGGSTR	52	1	| nxp:NX_P11142-1
AVTEQGHELSNEER	52	1	| nxp:NX_P31946-1
VEAQLQELQVK	52	1	| nxp:NX_P35579-1
LTLYDIAHTPGVAADLSHIETK	52	1	| nxp:NX_P40926-1
AQLLELPYAR	52	1	| nxp:NX_P50453-1
VLGATLLPDLIQK	52	1	| nxp:NX_P55786-1
LLDSSTVTHLFK	52	1	| nxp:NX_P60900-1
TGPNLHGLFGR	52	1	| nxp:NX_P99999-1
HGEVCPAGWKPGSDTIKPDVQK	52	1	| nxp:NX_Q06830-1
SPGADLLQVLTK	52	1	| nxp:NX_Q3LXA3-1
ESNTVFSFLGLKPR	52	1	| nxp:NX_Q9UJC5-1
SLNFEEQILEAAK	52	1	| nxp:NX_Q9Y490-1
MATNAAAQNAIK	52	1	| nxp:NX_Q9Y490-1
IGITNHDE	52	1	| nxp:NX_Q9Y490-1
AVSSAIAQLLGEVAQGNENYAGIAAR	52	1	| nxp:NX_Q9Y490-1
SAKPTKPAASDLPVPAEGVR	51	6	| nxp:NX_Q05682-5 | nxp:NX_Q05682-4 | nxp:NX_Q05682-3 | nxp:NX_Q05682-6 | nxp:NX_Q05682-2 | nxp:NX_Q05682-1
QWHVEHFVCAK	51	4	| nxp:NX_P48059-4 | nxp:NX_P48059-2 | nxp:NX_P48059-5 | nxp:NX_P48059-3
CEKPFLGHR	51	4	| nxp:NX_P48059-4 | nxp:NX_P48059-2 | nxp:NX_P48059-5 | nxp:NX_P48059-3
ESTLHLVLR	51	4	nxp:NX_P62987-1 | nxp:NX_P62979-1 | nxp:NX_P0CG47-1 | nxp:NX_P0CG48-1
LSNRPAFM(15.9949)PSEGR	51	3	| nxp:NX_P12814-1 | nxp:NX_P12814-3 | nxp:NX_P12814-2
IINEPTAAAIAYGLDR	51	2	| nxp:NX_P08107-1 | nxp:NX_P17066-1
VHSPSGALEECYVTEIDQDKYAVR	51	2	| nxp:NX_P21333-2 | nxp:NX_P21333-1
DFQGTPTFTYK	51	2	| nxp:NX_Q15833-2 | nxp:NX_Q15833-1
DGVLALDNFHR	51	2	| nxp:NX_Q70J99-1 | nxp:NX_Q70J99-3
FLPEGCQPLVSSAVDR	51	2	| nxp:NX_Q86YW5-2 | nxp:NX_Q86YW5-1
VPFLVLECPNLK	51	2	| nxp:NX_Q9NRP0-1 | nxp:NX_Q9NRP0-2
GVTFNVTTVDTK	51	1	| nxp:NX_O00299-1
NSNPALNDNLEK	51	1	| nxp:NX_O00299-1
VEQIAAIAQELNELDYYDSHNVNTR	51	1	| nxp:NX_O43707-1
DYSGQGVVK	51	1	| nxp:NX_O75083-1
DYIWNTLNSGR	51	1	| nxp:NX_O75390-1
INETRDVLAK	51	1	| nxp:NX_P00488-1
QSPVDIDTHTAK	51	1	| nxp:NX_P00918-1
LCENIAGHLK	51	1	| nxp:NX_P04040-1
THYSNIEANESEEVR	51	1	| nxp:NX_P04632-1
AHGGYSVFAGVGER	51	1	| nxp:NX_P06576-1
HLEINPDHSIIETLR	51	1	| nxp:NX_P07900-2
ALSNVEGFER	51	1	| nxp:NX_P08514-1
LGAEVYHTLK	51	1	| nxp:NX_P09104-1
HLDHVAALFPGDVDR	51	1	| nxp:NX_P11216-1
LAPITSDPTEATAVGAVEASFK	51	1	| nxp:NX_P14618-1
FECQPGYR	51	1	| nxp:NX_P16109-1
IQVWHEEHR	51	1	| nxp:NX_P26038-1
LIALSIDSVEDHLAWSK	51	1	| nxp:NX_P30041-1
DAGQISGLNVLR	51	1	| nxp:NX_P38646-1
ANTFVAELK	51	1	| nxp:NX_P40926-1
TATPQQAQEVHEK	51	1	| nxp:NX_P60174-3
DREVGIPPEQSLETAK	51	1	| nxp:NX_P61158-1
VSFELFADK	51	1	| nxp:NX_P62937-1
YNFVLQVAK	51	1	| nxp:NX_Q13201-1
YAPLHLVPLIER	51	1	| nxp:NX_Q7L576-1
ILGIPVIVTEQYPK	51	1	| nxp:NX_Q96CN7-1
ASAGPQPLLVQSCK	51	1	| nxp:NX_Q9Y490-1
TAIAALNSCLR	51	1	| nxp:NX_Q9Y490-1
ASSLIEEAK	51	1	| nxp:NX_Q9Y490-1
IQLVEEELDR	50	17	| nxp:NX_P09493-2 | nxp:NX_P09493-5 | nxp:NX_P67936-1 | nxp:NX_P06753-2 | nxp:NX_P09493-4 | nxp:NX_P09493-3 | nxp:NX_P09493-10 | nxp:NX_P09493-8 | nxp:NX_P67936-2 | nxp:NX_P07951-1 | nxp:NX_P06753-1 | nxp:NX_P07951-2 | nxp:NX_P06753-5 | nxp:NX_P09493-1 | nxp:NX_P09493-6 | nxp:NX_P09493-7 | nxp:NX_P09493-9
LAVNMVPFPR	50	9	| nxp:NX_P07437-1 | nxp:NX_P68371-1 | nxp:NX_Q9BUF5-1 | nxp:NX_Q13509-1 | nxp:NX_Q9H4B7-1 | nxp:NX_A6NNZ2-1 | nxp:NX_Q3ZCM7-1 | nxp:NX_A6NKZ8-1 | nxp:NX_P04350-1
FGSCQQGVAATFTK	50	7	| nxp:NX_P23229-4 | nxp:NX_P23229-2 | nxp:NX_P23229-5 | nxp:NX_P23229-3 | nxp:NX_P23229-9 | nxp:NX_P23229-6 | nxp:NX_P23229-1
ATDCVGHDVVTLLR	50	4	| nxp:NX_P19367-4 | nxp:NX_P19367-2 | nxp:NX_P19367-1 | nxp:NX_P19367-3
SFPDFPTPGVVFR	50	2	| nxp:NX_P07741-2 | nxp:NX_P07741-1
VGFQYEGTYK	50	2	| nxp:NX_P11413-3 | nxp:NX_P11413-2
YALSNSIGPVR	50	2	| nxp:NX_P14543-2 | nxp:NX_P14543-1
GVVQELQQAISK	50	2	| nxp:NX_P29692-2 | nxp:NX_P29692-3
NKDQGTYEDYVEGLR	50	2	| nxp:NX_P60660-1 | nxp:NX_P60660-2
YYSFFDLDPK	50	2	| nxp:NX_Q86UX7-2 | nxp:NX_Q86UX7-1
TATVSSPLTSPTSPSTLSLK	50	2	| nxp:NX_Q9UBW5-2 | nxp:NX_Q9UBW5-1
LAALNPESNTAGLDIFAK	50	1	| nxp:NX_O00299-1
YEYQPFAGK	50	1	| nxp:NX_O75083-1
TVNSNIPTNLR	50	1	| nxp:NX_P02675-1
GDVTAQIALQPALK	50	1	| nxp:NX_P04179-1
LHGDCQDLQK	50	1	| nxp:NX_P04275-1
VLDSGAPIK	50	1	| nxp:NX_P06576-1
KAPSDLYQIILK	50	1	| nxp:NX_P07384-1
AYDATHLVK	50	1	| nxp:NX_P10768-1
VTDALNATR	50	1	| nxp:NX_P10809-1
LSKDPNIVIAK	50	1	| nxp:NX_P30101-1
PPHIYAITDTAYR	50	1	| nxp:NX_P35579-1
NVIGLQM(15.9949)GTNR	50	1	| nxp:NX_P37802-1
SSGGFVWACK	50	1	| nxp:NX_P48735-1
QASPNIVIALAGNK	50	1	| nxp:NX_P51148-2
DHYSNGFCTVYAK	50	1	| nxp:NX_P52907-1
FTITPPTAQVVGVLK	50	1	| nxp:NX_P52907-1
HLIPAANTGESK	50	1	| nxp:NX_P62258-1
IAALVIDNGSGM(15.9949)CK	50	1	| nxp:NX_P63261-1
INGDLQITK	50	1	| nxp:NX_Q3ZCW2-1
LGALFQPDSFVHGN	50	1	| nxp:NX_Q9H4B7-1
EHQISPGDFPNLK	50	1	| nxp:NX_Q9NZN3-1
AGFLDLKDFLPK	50	1	| nxp:NX_Q9Y490-1
VM(15.9949)VTNVTSLLK	50	1	| nxp:NX_Q9Y490-1
HYFQNTQGLIFVVDSNDR	49	4	| nxp:NX_P84085-1 | nxp:NX_P84077-1 | nxp:NX_P61204-1 | nxp:NX_P18085-1
ASAAPKPEPVPVQK	49	4	| nxp:NX_Q96HC4-4 | nxp:NX_Q96HC4-1 | nxp:NX_Q96HC4-3 | nxp:NX_Q96HC4-2
EGIPPDQQR	49	4	nxp:NX_P62987-1 | nxp:NX_P62979-1 | nxp:NX_P0CG47-1 | nxp:NX_P0CG48-1
LLASAGQDNVVR	49	3	| nxp:NX_Q5JSH3-2 | nxp:NX_Q5JSH3-1 | nxp:NX_Q5JSH3-4
LLVSASQDGK	49	3	| nxp:NX_Q9HAV0-1 | nxp:NX_P62879-1 | nxp:NX_P62873-1
STPAITLESPDIKYPLR	49	2	| nxp:NX_P00387-1 | nxp:NX_P00387-3
NSLFEYQK	49	2	| nxp:NX_P02671-2 | nxp:NX_P02671-1
ADQATPTSPIR	49	2	| nxp:NX_P21333-2 | nxp:NX_P21333-1
SPFEVYVDK	49	2	| nxp:NX_P21333-2 | nxp:NX_P21333-1
YQLDPTASISAK	49	2	| nxp:NX_P45880-3 | nxp:NX_P45880-1
EHPVLLTEAPLNPK	49	2	| nxp:NX_P63261-1 | nxp:NX_P60709-1
HSSLAGCQIINYR	49	2	| nxp:NX_Q00610-2 | nxp:NX_Q00610-1
DYPGLPVFLLGH	49	2	| nxp:NX_Q99685-2 | nxp:NX_Q99685-1
SNTWSWGILK	49	1	| nxp:NX_O15117-3
NGGWTVIQNR	49	1	| nxp:NX_P02675-1
HPDYSVVLLLR	49	1	| nxp:NX_P02768-1
ETCFAEEGKK	49	1	| nxp:NX_P02768-1
CPLLKPWALTF	49	1	| nxp:NX_P04075-2
GGGGGGYGSGGSSYGSGGGSYGSGGGGGGGR	49	1	| nxp:NX_P04264-1
AEEDKIPLLVVGNK	49	1	| nxp:NX_P11234-1
AVQPGETYTYK	49	1	| nxp:NX_P12259-1
IPLTICFPEYK	49	1	| nxp:NX_P19086-1
GYGYGQGAGTLSTDKGESLGIK	49	1	| nxp:NX_P21291-1
DKPLKDVIIADCGK	49	1	| nxp:NX_P23284-1
ILGLLDAYLK	49	1	| nxp:NX_P26641-1
PGGLLLGDVAPNFEANTTVGR	49	1	| nxp:NX_P30041-1
TQAYQDQKPGTSGLR	49	1	| nxp:NX_P36871-1
QILIQWITTQCR	49	1	| nxp:NX_P37802-1
HECQANGPEDLNR	49	1	| nxp:NX_P60981-1
LVLVGDGGTGK	49	1	| nxp:NX_P62826-1
VNVDEVGGEALGR	49	1	| nxp:NX_P68871-1
LVQAFQFTDK	49	1	| nxp:NX_Q06830-1
SPGAPGPLTLK	49	1	| nxp:NX_Q15942-1
SGDGEGTPVEHVR	49	1	| nxp:NX_Q7L576-1
LFVEAVEQNTLQEFLK	49	1	| nxp:NX_Q9H299-1
SLQAQLQR	49	1	| nxp:NX_Q9NTJ5-1
QELAVFCSPEPPAK	49	1	| nxp:NX_Q9Y490-1
DDILNGSHPVSFDK	49	1	| nxp:NX_Q9Y490-1
LAVNM(15.9949)VPFPR	48	9	| nxp:NX_P07437-1 | nxp:NX_P68371-1 | nxp:NX_Q9BUF5-1 | nxp:NX_Q13509-1 | nxp:NX_Q9H4B7-1 | nxp:NX_A6NNZ2-1 | nxp:NX_Q3ZCM7-1 | nxp:NX_A6NKZ8-1 | nxp:NX_P04350-1
TIEEIQGLTTAHEQFK	48	3	| nxp:NX_P12814-1 | nxp:NX_P12814-3 | nxp:NX_P12814-2
LQEIYNSNNQK	48	2	| nxp:NX_P02679-2 | nxp:NX_P02679-1
LLPYLAEDELR	48	2	| nxp:NX_P13224-1 | nxp:NX_P13224-2
ASLHGGEPTTIIR	48	2	| nxp:NX_P14543-2 | nxp:NX_P14543-1
ASGPGLNTTGVPASLPVEFTIDAK	48	2	| nxp:NX_P21333-2 | nxp:NX_P21333-1
SGKPAELLK	48	2	| nxp:NX_P29401-1 | nxp:NX_P29401-2
TIAIIAEGIPEALTR	48	2	| nxp:NX_P53396-2 | nxp:NX_P53396-1
GYAFNHSADFETVR	48	2	| nxp:NX_P61160-1 | nxp:NX_P61160-2
TVPIYEGYALPHAILR	48	2	| nxp:NX_P63261-1 | nxp:NX_P60709-1
QVIGTGSFFPK	48	2	| nxp:NX_Q13642-5 | nxp:NX_Q13642-4
TAAELLQSQGSQAGGSQTLK	48	2	| nxp:NX_Q14141-4 | nxp:NX_Q14141-1
DVTNNVHYENYR	48	2	| nxp:NX_Q16181-2 | nxp:NX_Q16181-1
ISDALLQLTCVSCVR	48	2	| nxp:NX_Q27J81-2 | nxp:NX_Q27J81-1
CYVCTDCGTNLK	48	1	| nxp:NX_O00151-1
IEEFLEAVLCPPR	48	1	| nxp:NX_O00299-1
ELSEAAEAQHGPHSAVAR	48	1	| nxp:NX_O75558-1
AVPPNNSNAAEDDLPTVELQGVVPR	48	1	| nxp:NX_P00488-1
LTLDKLDVK	48	1	| nxp:NX_P00558-1
ILAGPAGDSNVVK	48	1	| nxp:NX_P04275-1
VTAEVVLAHLGGGSTSR	48	1	| nxp:NX_P04843-1
LKDDEVAQLK	48	1	| nxp:NX_P07195-1
SEQFINLR	48	1	| nxp:NX_P07384-1
APAVVLHGDTHVQEQTR	48	1	| nxp:NX_P08514-1
GFALVGPEVVQCTASGVWTAPAPVCK	48	1	| nxp:NX_P16109-1
VAIIDTYK	48	1	| nxp:NX_P16671-1
GALPLDTVTFYK	48	1	| nxp:NX_P30040-1
QACVLM(15.9949)IK	48	1	| nxp:NX_P35579-1
SSLNPILFR	48	1	| nxp:NX_P39656-1
EHYPNGVCTVYGK	48	1	| nxp:NX_P47755-1
FKDIFQEIFDK	48	1	| nxp:NX_P48735-1
QVWGLNFGSK	48	1	| nxp:NX_P50552-1
TAVEHATDEDILAK	48	1	| nxp:NX_P50851-2
ATIGADFLTK	48	1	| nxp:NX_P51149-1
ELQELVQYPVEHPDK	48	1	| nxp:NX_P55072-1
TLTGTVIDSGDGVTHVIPVAEGYVIGSCIK	48	1	| nxp:NX_P61158-1
AVFVDLEPTVIDEIR	48	1	| nxp:NX_P68366-1
AQEQQSLIHTNQAESHTAVGR	48	1	| nxp:NX_Q13201-1
VTVAGLAGKDPVQCSR	48	1	| nxp:NX_Q99497-1
EVDQQLLSVQTR	48	1	| nxp:NX_Q9H4B7-1
EHQISPGDFPSLR	48	1	| nxp:NX_Q9H4M9-1
SCSGVEFSTSGHAYTDTGK	48	1	| nxp:NX_Q9Y277-1
KFDQLLAEEK	47	9	| nxp:NX_P35579-1 | nxp:NX_P35580-1 | nxp:NX_P35580-2 | nxp:NX_P35580-3 | nxp:NX_P35580-4 | nxp:NX_P35749-4 | nxp:NX_P35749-3 | nxp:NX_P35749-1 | nxp:NX_P35749-2
SATLLQLITK	47	6	| nxp:NX_O00429-4 | nxp:NX_O00429-3 | nxp:NX_O00429-5 | nxp:NX_O00429-2 | nxp:NX_O00429-1 | nxp:NX_O00429-6
CIIPNHEK	47	5	| nxp:NX_P35579-1 | nxp:NX_P35580-1 | nxp:NX_P35580-2 | nxp:NX_P35580-3 | nxp:NX_P35580-4
ELPPDQAEYCIAR	47	4	| nxp:NX_P12814-1 | nxp:NX_O43707-1 | nxp:NX_P12814-3 | nxp:NX_P12814-2
ITPELLTR	47	4	| nxp:NX_P19367-4 | nxp:NX_P19367-2 | nxp:NX_P19367-1 | nxp:NX_P19367-3
VVLIGDSGVGK	47	3	| nxp:NX_P62491-2 | nxp:NX_P62491-1 | nxp:NX_Q15907-1
YLECSALTQR	47	3	| nxp:NX_P63000-1 | nxp:NX_P15153-1 | nxp:NX_P63000-2
SGAPWFK	47	3	| nxp:NX_Q0ZGT2-4 | nxp:NX_Q0ZGT2-1 | nxp:NX_Q0ZGT2-3
GPALLVLGPDAIQLR	47	3	| nxp:NX_Q7L591-1 | nxp:NX_Q7L591-4 | nxp:NX_Q7L591-3
PNNPDWGTFEEVSGNVSPGTR	47	2	| nxp:NX_P02671-2 | nxp:NX_P02671-1
VGPEADKYR	47	2	| nxp:NX_P02679-2 | nxp:NX_P02679-1
YFPTQALNFAFK	47	2	| nxp:NX_P12236-1 | nxp:NX_P05141-1
DGSCSVEYIPYEAGTYSLNVTYGGHQVPGSPFK	47	2	| nxp:NX_P21333-2 | nxp:NX_P21333-1
GEYTLVVK	47	2	| nxp:NX_P21333-2 | nxp:NX_P21333-1
LPQLPITNFSR	47	2	| nxp:NX_P21333-2 | nxp:NX_P21333-1
EAFQLFDR	47	2	| nxp:NX_P60660-1 | nxp:NX_P60660-2
LPRPSSLSDK	47	2	| nxp:NX_Q86UX7-2 | nxp:NX_Q86UX7-1
AHQNVAQLSLAEAQLR	47	2	| nxp:NX_Q86UX7-2 | nxp:NX_Q86UX7-1
YGILADAR	47	2	| nxp:NX_Q86UX7-2 | nxp:NX_Q86UX7-1
FYEEVHDLER	47	2	| nxp:NX_Q99733-1 | nxp:NX_P55209-1
FATASADGQIYIYDGK	47	1	| nxp:NX_O75083-1
IAVVGEGR	47	1	| nxp:NX_O75083-1
EIRPNSTVQWEEVCRPWVSGHR	47	1	| nxp:NX_P00488-1
YTLFQIFSK	47	1	| nxp:NX_P04275-1
YISPDQLADLYK	47	1	| nxp:NX_P06733-1
LPPGEYVVVPSTFEPNK	47	1	| nxp:NX_P07384-1
HSQFIGYPITLFVEK	47	1	| nxp:NX_P07900-2
DNCPFHYNPAQYDYDRDDVGDR	47	1	| nxp:NX_P07996-1
SGTSEFLNK	47	1	| nxp:NX_P14625-1
AFHNEAQVNPER	47	1	| nxp:NX_P17987-1
HGESAWNLENR	47	1	| nxp:NX_P18669-1
SHGSQETDEEFDAR	47	1	| nxp:NX_P20674-1
LSILYPATTGR	47	1	| nxp:NX_P30041-1
QAGPASVPLR	47	1	| nxp:NX_P30101-1
AAALEFLNR	47	1	| nxp:NX_P31948-1
NAEQYKDQADK	47	1	| nxp:NX_P35579-1
EEVGEEAIVELVENGKK	47	1	| nxp:NX_P35579-1
IAILTCPFEPPKPK	47	1	| nxp:NX_P48643-1
YNQATPNFHQWR	47	1	| nxp:NX_P50552-1
LRPGDCEVCISYLGR	47	1	| nxp:NX_P55145-1
QKPITPETAEK	47	1	| nxp:NX_P60953-2
IGHPAPNFK	47	1	| nxp:NX_Q06830-1
EANSIIITPGYGLCAAK	47	1	| nxp:NX_Q13423-1
LIEHGVNTAEDLVR	47	1	| nxp:NX_Q8IUI8-1
REGTETFADHR	47	1	| nxp:NX_Q9Y490-1
TLSHPQQM(15.9949)ALLDQTK	47	1	| nxp:NX_Q9Y490-1
AVTDSINQLITMCTQQAPGQK	47	1	| nxp:NX_Q9Y490-1
NSRPEANEALER	47	1	| nxp:NX_Q9Y696-1
GQHVPGSPFQF	46	4	| nxp:NX_P21333-2 | nxp:NX_P21333-1 | nxp:NX_Q14315-2 | nxp:NX_Q14315-1
DPLQVHLPLR	46	3	| nxp:NX_Q8NE86-3 | nxp:NX_Q8NE86-1 | nxp:NX_Q8NE86-2
ELERPGGNEITR	46	2	| nxp:NX_P02671-2 | nxp:NX_P02671-1
KGVNLPGAAVDLPAVSEK	46	2	| nxp:NX_P14618-1 | nxp:NX_P14618-2
AFGPGLQGGSAGSPAR	46	2	| nxp:NX_P21333-2 | nxp:NX_P21333-1
EEGPYEVEVTYDGVPVPGSPFPLEAVAPTKPSK	46	2	| nxp:NX_P21333-2 | nxp:NX_P21333-1
NGQHVASSPIPVVISQSEIGDASR	46	2	| nxp:NX_P21333-2 | nxp:NX_P21333-1
EPAAPVSIQR	46	2	| nxp:NX_Q14847-1 | nxp:NX_Q14847-2
NAYVWTLK	46	1	| nxp:NX_O15143-1
WWTCFVK	46	1	| nxp:NX_O15145-1
CGFCNQPIR	46	1	| nxp:NX_O43294-1
ASFNHFDK	46	1	| nxp:NX_O43707-1
HRPELIEYDK	46	1	| nxp:NX_O43707-1
VAHEPVAPPEDK	46	1	| nxp:NX_O95674-1
LVNEVTEFAK	46	1	| nxp:NX_P02768-1
ELSDIAHR	46	1	| nxp:NX_P04075-2
IISNASCTTN	46	1	| nxp:NX_P04406-1
LATQSNEITIPVTFESR	46	1	| nxp:NX_P04792-1
AKWDTANNPLYK	46	1	| nxp:NX_P05106-1
FLVGPDGVPLR	46	1	| nxp:NX_P07203-1
TLVLLM(15.9949)GK	46	1	| nxp:NX_P07737-1
HYNPAQYDYDR	46	1	| nxp:NX_P07996-1
GFGFGQGAGALVHSE	46	1	| nxp:NX_P21291-1
ISQLEM(15.9949)AR	46	1	| nxp:NX_P26038-1
VHVIFNYK	46	1	| nxp:NX_P27797-1
AGLPLWALPGGDAECPGPR	46	1	| nxp:NX_P40197-1
HDAATCFVDAGNAFK	46	1	| nxp:NX_P54920-1
VNPTVFFDIAVDGEPLGR	46	1	| nxp:NX_P62937-1
LEEVLTNKK	46	1	| nxp:NX_P78417-1
FSGFEASHGPIK	46	1	| nxp:NX_Q12913-1
QNVAVNELCGR	46	1	| nxp:NX_Q15942-1
LVEIAQVPK	46	1	| nxp:NX_Q16851-1
QESLLSGPPR	46	1	| nxp:NX_Q86YW5-2
VTWDSSFCAVNPR	46	1	| nxp:NX_Q9ULV4-1
QAAASATQTIAAAQH	46	1	| nxp:NX_Q9Y490-1
AAMEPIVISAK	46	1	| nxp:NX_Q9Y490-1
SHQDADIEDFK	46	1	nxp:NX_P11021-1
SQYEQLAEQNRK	46	1	nxp:NX_P13645-1
YMACCLLYR	45	4	| nxp:NX_P68366-1 | nxp:NX_Q9BQE3-1 | nxp:NX_Q71U36-1 | nxp:NX_P68363-1
SVQLNGLTLK	45	3	| nxp:NX_Q9Y251-2 | nxp:NX_Q9Y251-1 | nxp:NX_Q9Y251-3
FHVEEEGK	45	2	| nxp:NX_P00558-1 | nxp:NX_P07205-1
HRHPDEAAFFDTASTGK	45	2	| nxp:NX_P02671-2 | nxp:NX_P02671-1
M(15.9949)ELERPGGNEITR	45	2	| nxp:NX_P02671-2 | nxp:NX_P02671-1
AQCQEPCKDTVQIHDITGK	45	2	| nxp:NX_P02679-2 | nxp:NX_P02679-1
NGNLQYDLH	45	2	| nxp:NX_P06396-3 | nxp:NX_P06396-1
SSLFIIASK	45	2	| nxp:NX_P06744-1 | nxp:NX_P06744-2
DHSGTLGPEEFK	45	2	| nxp:NX_P12814-1 | nxp:NX_P12814-3
AECLNPSQPSR	45	2	| nxp:NX_P14543-2 | nxp:NX_P14543-1
VLQLTSWDEDAWASK	45	2	| nxp:NX_P18206-2 | nxp:NX_P18206-1
AGNNMLLVGVHGPR	45	2	| nxp:NX_P21333-2 | nxp:NX_P21333-1
TVTVGQACNPSACR	45	2	| nxp:NX_P21333-2 | nxp:NX_P21333-1
GIHPTIISESFQK	45	2	| nxp:NX_P50991-2 | nxp:NX_P50991-1
GYSFTTTAEREIVR	45	2	| nxp:NX_P63261-1 | nxp:NX_P60709-1
FCANTCVECR	45	2	| nxp:NX_Q13642-5 | nxp:NX_Q13642-4
YHEEFEK	45	2	| nxp:NX_Q14847-1 | nxp:NX_Q14847-2
TCEEHQLCVVAVLPH	45	2	| nxp:NX_Q15084-1 | nxp:NX_Q15084-2
DNALTLLIK	45	2	| nxp:NX_Q9H3U1-2 | nxp:NX_Q9H3U1-1
FESDPATHNEPGVR	45	2	| nxp:NX_Q9NVA2-1 | nxp:NX_Q9NVA2-2
VFQVVESTRPGK	45	2	| nxp:NX_Q9Y251-2 | nxp:NX_Q9Y251-1
FITTVGIDFR	45	1	| nxp:NX_O00194-1
DIAWTEDSKR	45	1	| nxp:NX_O75083-1
LFAYPDTHR	45	1	| nxp:NX_P04040-1
FTQAGSEVSALLGR	45	1	| nxp:NX_P06576-1
NFEDVAFDEKK	45	1	| nxp:NX_P07237-1
SNFAEALAAHK	45	1	| nxp:NX_P07237-1
LFTAESLIGLK	45	1	| nxp:NX_P48444-1
FDASFFGVHPK	45	1	| nxp:NX_P49327-1
IINEVSKPLAH	45	1	| nxp:NX_P55145-1
HEGTNFVVDQSQAVK	45	1	| nxp:NX_Q13418-1
FSFQCPGR	45	1	| nxp:NX_Q13418-1
IDKPLCHSEDEK	45	1	| nxp:NX_Q13586-1
NVVLQTLEGHLR	45	1	| nxp:NX_Q14254-1
CNTCGEPITDR	45	1	| nxp:NX_Q15942-1
ISAESPTGLPSHK	45	1	| nxp:NX_Q96C24-1
APPNATLEHFYLTSGK	45	1	| nxp:NX_Q96G23-1
VLGEAM(15.9949)TGISQNAK	45	1	| nxp:NX_Q9Y490-1
ERELEEAR	45	1	| nxp:NX_Q9Y490-1
GPFPPPPPLPLAAPLPH	45	1	| nxp:NX_Q9Y613-1
ITPSYVAFTPEGER	45	1	nxp:NX_P11021-1
LLGWIQNK	44	10	| nxp:NX_O75369-6 | nxp:NX_O75369-3 | nxp:NX_O75369-2 | nxp:NX_O75369-9 | nxp:NX_O75369-1 | nxp:NX_O75369-8 | nxp:NX_P21333-2 | nxp:NX_P21333-1 | nxp:NX_Q14315-2 | nxp:NX_Q14315-1
CVVVGDGAVGK	44	5	| nxp:NX_P60953-2 | nxp:NX_P63000-1 | nxp:NX_P15153-1 | nxp:NX_P63000-2 | nxp:NX_P84095-1
IQGLTTAHEQFK	44	3	| nxp:NX_P12814-1 | nxp:NX_P12814-3 | nxp:NX_P12814-2
SAAAIALPPIAK	44	3	| nxp:NX_P50851-2 | nxp:NX_P50851-1 | nxp:NX_Q8NFP9-1
VLITTDLLAR	44	3	| nxp:NX_P60842-1 | nxp:NX_Q14240-1 | nxp:NX_Q14240-2
GYALPHAILR	44	3	| nxp:NX_P63261-1 | nxp:NX_Q562R1-1 | nxp:NX_P60709-1
ENVFQEHQTLK	44	3	| nxp:NX_Q14247-3 | nxp:NX_Q14247-1 | nxp:NX_Q14247-2
EHALLAYTLGVK	44	3	| nxp:NX_Q5VTE0-1 | nxp:NX_P68104-1 | nxp:NX_Q05639-1
ELQSLAAAVVPSAQTLK	44	2	| nxp:NX_O76074-2 | nxp:NX_O76074-1
NQFNLEDPHQK	44	2	| nxp:NX_O76074-2 | nxp:NX_O76074-1
MELERPGGNEITR	44	2	| nxp:NX_P02671-2 | nxp:NX_P02671-1
SNTPILVDGK	44	2	| nxp:NX_P06744-1 | nxp:NX_P06744-2
LANVMM(15.9949)GPYR	44	2	| nxp:NX_P18206-2 | nxp:NX_P18206-1
YWPQEAGEYAVHVLCNSEDIR	44	2	| nxp:NX_P21333-2 | nxp:NX_P21333-1
IVGPSGAAVPCKVEPGLGADNSVVR	44	2	| nxp:NX_P21333-2 | nxp:NX_P21333-1
NLQNLLILTAIK	44	2	| nxp:NX_Q00610-2 | nxp:NX_Q00610-1
VSQPIEGHAASFAQFK	44	2	| nxp:NX_Q00610-2 | nxp:NX_Q00610-1
NIQVSHQEFSK	44	2	| nxp:NX_Q8WUM4-1 | nxp:NX_Q8WUM4-2
SLVISPPVR	44	2	| nxp:NX_Q9UBW5-2 | nxp:NX_Q9UBW5-1
VWSPLVTEEGK	44	1	| nxp:NX_O00151-1
IKDIAWTEDSKR	44	1	| nxp:NX_O75083-1
HGGTIPIVPTAEFQDR	44	1	| nxp:NX_P00367-1
VFGFSLITNK	44	1	| nxp:NX_P00491-1
HGTDDGVVWM(15.9949)NWK	44	1	| nxp:NX_P02675-1
TTCLPMFGYK	44	1	| nxp:NX_P05106-1
GNPTVEVDLFTSK	44	1	| nxp:NX_P06733-1
VTEENKELANELR	44	1	| nxp:NX_P07996-1
VYLFLQPR	44	1	| nxp:NX_P08514-1
YPVNSVNILK	44	1	| nxp:NX_P17987-1
HENIIGINDIIR	44	1	| nxp:NX_P28482-1
EATNPPVIQEEKPK	44	1	| nxp:NX_P30101-1
TADGIVSHLK	44	1	| nxp:NX_P30101-1
QVALWDTK	44	1	| nxp:NX_P31146-1
YLYVDK	44	1	| nxp:NX_P35579-1
LKPLEVELR	44	1	| nxp:NX_P49755-1
AFQSLLTEVNK	44	1	| nxp:NX_P50453-1
KEAAENSLVAYK	44	1	| nxp:NX_P62258-1
LFVSGACDASAK	44	1	| nxp:NX_P62873-1
GSGNLEAIHIIK	44	1	| nxp:NX_P78371-1
VTQTLIPYYISVK	44	1	| nxp:NX_Q13201-1
IHFHNLQGEK	44	1	| nxp:NX_Q8TC12-1
VYSTSVTGSR	44	1	| nxp:NX_Q9H299-1
NGNLPEFGDAISTASK	44	1	| nxp:NX_Q9Y490-1
FSYLPIQK	43	7	| nxp:NX_P23229-4 | nxp:NX_P23229-2 | nxp:NX_P23229-5 | nxp:NX_P23229-3 | nxp:NX_P23229-9 | nxp:NX_P23229-6 | nxp:NX_P23229-1
GVSPEPIHLK	43	6	| nxp:NX_O00429-4 | nxp:NX_O00429-3 | nxp:NX_O00429-5 | nxp:NX_O00429-2 | nxp:NX_O00429-1 | nxp:NX_O00429-6
PSDLRPGDVSSK	43	6	| nxp:NX_Q05682-5 | nxp:NX_Q05682-4 | nxp:NX_Q05682-3 | nxp:NX_Q05682-6 | nxp:NX_Q05682-2 | nxp:NX_Q05682-1
LEHEYIHNFK	43	5	| nxp:NX_Q9UPY8-2 | nxp:NX_Q9UPY8-1 | nxp:NX_Q15555-3 | nxp:NX_Q15555-1 | nxp:NX_Q15555-4
KIQVLQQQADDAEER	43	3	| nxp:NX_P06753-5 | nxp:NX_P06753-2 | nxp:NX_P06753-3
IDQLEGDHQLIQEALIFDNK	43	3	| nxp:NX_P12814-1 | nxp:NX_P12814-3 | nxp:NX_P12814-2
VYLHCTNTDNPR	43	3	| nxp:NX_Q9Y251-2 | nxp:NX_Q9Y251-1 | nxp:NX_Q9Y251-3
AGKEPGLQIWR	43	2	| nxp:NX_P06396-3 | nxp:NX_P06396-1
GLVGEIIK	43	2	| nxp:NX_P15531-2 | nxp:NX_P22392-2
LANVMMGPYR	43	2	| nxp:NX_P18206-2 | nxp:NX_P18206-1
AVHVLCNSEDIR	43	2	| nxp:NX_P21333-2 | nxp:NX_P21333-1
AEISFEDRK	43	2	| nxp:NX_P21333-2 | nxp:NX_P21333-1
AYGPGIEPTGNM(15.9949)VK	43	2	| nxp:NX_P21333-2 | nxp:NX_P21333-1
ALTQTGGPHVK	43	2	| nxp:NX_P21333-2 | nxp:NX_P21333-1
KDDPTLLSSGR	43	2	| nxp:NX_P22061-1 | nxp:NX_P22061-2
VDNHLFNK	43	2	| nxp:NX_P48426-1 | nxp:NX_P78356-1
NLWPFVSDPAPTASSQAAVSAR	43	2	| nxp:NX_Q15833-2 | nxp:NX_Q15833-1
ADALQAGASQFETSAAK	43	2	| nxp:NX_Q15836-1 | nxp:NX_P63027-1
LLAETVAPAVR	43	2	| nxp:NX_Q9BSJ8-1 | nxp:NX_Q9BSJ8-2
GSLTFEPLTLVPIQTK	43	2	| nxp:NX_Q9NQW7-2 | nxp:NX_Q9NQW7-3
GPSGYGFNLHSDK	43	1	| nxp:NX_O14745-1
EHNGQVTGIDWAPESNR	43	1	| nxp:NX_O15143-1
SIQCLTVHK	43	1	| nxp:NX_O75083-1
TVEAEAAHGTVTR	43	1	| nxp:NX_O75874-1
DRIPVYSAFR	43	1	| nxp:NX_O94919-1
QISLEGSVK	43	1	| nxp:NX_O95810-1
YQISVNK	43	1	| nxp:NX_P02675-1
KELSDIAHR	43	1	| nxp:NX_P04075-2
AFVLSSVDELEQQR	43	1	| nxp:NX_P04275-1
THIALDGR	43	1	| nxp:NX_P05106-1
GFSLESCR	43	1	| nxp:NX_P07384-1
AQLYIDCEK	43	1	| nxp:NX_P07996-1
PAGAEDPLGAIHLR	43	1	| nxp:NX_P08567-1
EVIITGIQTQGAK	43	1	| nxp:NX_P12259-1
DHPLPEVAHVK	43	1	| nxp:NX_P13073-1
EHPVPLLPIR	43	1	| nxp:NX_P14317-1
FQSSHHPTDITSLDQYVER	43	1	| nxp:NX_P14625-1
LYGPLCGYYLGR	43	1	| nxp:NX_P24557-1
TSIAIDTIINQK	43	1	| nxp:NX_P25705-1
AQLQELQVK	43	1	| nxp:NX_P35579-1
SQLQDTQELLQEENR	43	1	| nxp:NX_P35579-1
DSGITYLGIK	43	1	| nxp:NX_P51452-1
GGEIQPVSVK	43	1	| nxp:NX_P61604-1
TETQEKNPLPSKETIEQEK	43	1	| nxp:NX_P62328-1
YLHDESGLNR	43	1	| nxp:NX_Q15019-2
SGYVPPPVATPFSSK	43	1	| nxp:NX_Q15942-1
TNVIQSLLAR	43	1	| nxp:NX_Q9NTJ5-1
ALCGFTEAAAQAAYLVGVSDPNSQAGQQGLVEPTQFAR	43	1	| nxp:NX_Q9Y490-1
TACGAPSGICLQVK	42	7	| nxp:NX_P23229-4 | nxp:NX_P23229-2 | nxp:NX_P23229-5 | nxp:NX_P23229-3 | nxp:NX_P23229-9 | nxp:NX_P23229-6 | nxp:NX_P23229-1
SPYLYPLYGLGELPQGFAR	42	3	| nxp:NX_P50395-2 | nxp:NX_P50395-1 | nxp:NX_P31150-1
GLATFCLDK	42	2	| nxp:NX_O00264-1 | nxp:NX_O15173-1
M(15.9949)ADEAGSEADHEGTHSTK	42	2	| nxp:NX_P02671-2 | nxp:NX_P02671-1
GSAGHWTSESSVSGSTGQWHSE	42	2	| nxp:NX_P02671-2 | nxp:NX_P02671-1
VAQLEAQCQEPCK	42	2	| nxp:NX_P02679-2 | nxp:NX_P02679-1
HHAAYVNNLNVTEEK	42	2	| nxp:NX_P04179-1 | nxp:NX_P04179-2
DSQEEEKTEALTSAK	42	2	| nxp:NX_P06396-3 | nxp:NX_P06396-1
EIQNAVNGVK	42	2	| nxp:NX_P10909-5 | nxp:NX_P10909-2
LNFSHGTHEYHAETIK	42	2	| nxp:NX_P14618-1 | nxp:NX_P14618-2
KIAELCDDPK	42	2	| nxp:NX_P18206-2 | nxp:NX_P18206-1
NQWIDNVEK	42	2	| nxp:NX_P18206-2 | nxp:NX_P18206-1
VDQLTAQLADLAAR	42	2	| nxp:NX_P18206-2 | nxp:NX_P18206-1
SVAVSPSLDLSK	42	2	| nxp:NX_P21333-2 | nxp:NX_P21333-1
TPCEEILVK	42	2	| nxp:NX_P21333-2 | nxp:NX_P21333-1
VLDPFTIKPLDR	42	2	| nxp:NX_P29401-1 | nxp:NX_P29401-2
DALSDLALHFLNK	42	2	| nxp:NX_P50991-2 | nxp:NX_P50991-1
YAVTTGDHGIIR	42	2	| nxp:NX_P53621-1 | nxp:NX_P53621-2
KKGEDEDKGPPCGPVNCNEK	42	2	| nxp:NX_Q06323-1 | nxp:NX_Q06323-2
TENLLGSYFPK	42	2	| nxp:NX_Q06323-1 | nxp:NX_Q06323-2
HTIPEEETHR	42	2	| nxp:NX_Q70J99-1 | nxp:NX_Q70J99-3
SQPLFQAVAAICR	42	2	| nxp:NX_Q86UX7-2 | nxp:NX_Q86UX7-1
VINSVDIK	42	1	| nxp:NX_O75083-1
RGDVIYILSK	42	1	| nxp:NX_O75563-1
ADDKETCFAEEGK	42	1	| nxp:NX_P02768-1
GAGAFGYFEVTHDITK	42	1	| nxp:NX_P04040-1
AQLGGPEAAK	42	1	| nxp:NX_P04792-1
TTCLPM(15.9949)FGYK	42	1	| nxp:NX_P05106-1
ISAFGYLECSAK	42	1	| nxp:NX_P08134-1
SRPSQVLDSPFPTGSAF	42	1	| nxp:NX_P08514-1
TGGVFLCPWR	42	1	| nxp:NX_P08514-1
APLIPM(15.9949)EHCTTR	42	1	| nxp:NX_P09486-1
SVSAFAPICNPVLCPWGK	42	1	| nxp:NX_P10768-1
YGVSGYPTLK	42	1	| nxp:NX_P30101-1
TDLLLEPYNK	42	1	| nxp:NX_P35579-1
ANLQIDQINTDLNLER	42	1	| nxp:NX_P35579-1
LQVELDNVTGLLSQSDSK	42	1	| nxp:NX_P35579-1
THSDQFLVAFK	42	1	| nxp:NX_P36542-1
IIHGSGYSDEDK	42	1	| nxp:NX_P50148-1
QIDLSTVDLKK	42	1	| nxp:NX_P55145-1
YLAEFATGNDRK	42	1	| nxp:NX_P62258-1
PNALSALSDLHAHK	42	1	| nxp:NX_P69905-1
NNEVSFSQIKPK	42	1	| nxp:NX_Q12913-1
EVVQNFAK	42	1	| nxp:NX_Q14019-1
SPSSSQPLPQVPAPAQS	42	1	| nxp:NX_Q15942-1
SFENSLGINVPR	42	1	| nxp:NX_Q16851-1
SNLSLASLTFQR	42	1	| nxp:NX_Q8N699-1
SVHPGTVQSELVR	42	1	| nxp:NX_Q8TC12-1
SSANVEEAFFTLAR	42	1	| nxp:NX_Q92930-1
LLDVVHPAAK	42	1	| nxp:NX_Q99832-1
GHYTEGAELIENVLEVVR	42	1	| nxp:NX_Q9H4B7-1
KTTDTASVQNEAKLDEILKEIK	42	1	| nxp:NX_Q9ULV4-1
EQGVEEHETLLLR	42	1	| nxp:NX_Q9Y490-1
AGALQCSPSDAYTKK	42	1	| nxp:NX_Q9Y490-1
SVTVHSSEPEVR	42	1	| nxp:NX_Q9Y624-1
VGEATETALTCLVEK	41	12	| nxp:NX_P16615-2 | nxp:NX_P16615-5 | nxp:NX_Q93084-4 | nxp:NX_P16615-3 | nxp:NX_Q93084-2 | nxp:NX_Q93084-3 | nxp:NX_Q93084-7 | nxp:NX_P16615-1 | nxp:NX_Q93084-1 | nxp:NX_Q93084-6 | nxp:NX_Q93084-5 | nxp:NX_P16615-4
ALQGASQIIAEIR	41	6	| nxp:NX_O00429-4 | nxp:NX_O00429-3 | nxp:NX_O00429-5 | nxp:NX_O00429-2 | nxp:NX_O00429-1 | nxp:NX_O00429-6
EIYTHFTCATDTK	41	6	| nxp:NX_P04899-3 | nxp:NX_P04899-2 | nxp:NX_P63096-1 | nxp:NX_P04899-1 | nxp:NX_P04899-4 | nxp:NX_P08754-1
STSFNVQDLLPDHEYK	41	6	| nxp:NX_Q15746-4 | nxp:NX_Q15746-2 | nxp:NX_Q15746-3 | nxp:NX_Q15746-6 | nxp:NX_Q15746-1 | nxp:NX_Q15746-5
TQIDHYVGIAR	41	5	| nxp:NX_O95197-3 | nxp:NX_O95197-4 | nxp:NX_O95197-7 | nxp:NX_O95197-2 | nxp:NX_O95197-1
YSQKEDKYEEEIK	41	3	| nxp:NX_P06753-5 | nxp:NX_P06753-2 | nxp:NX_P06753-1
VLHGEQYLELYKPLPR	41	3	| nxp:NX_P51659-1 | nxp:NX_P51659-3 | nxp:NX_P51659-2
VAVAIPNRPPDAVLTDTTSLNQAALYR	41	3	| nxp:NX_P51659-1 | nxp:NX_P51659-3 | nxp:NX_P51659-2
VHQLYETIQR	41	3	| nxp:NX_Q13561-1 | nxp:NX_Q13561-3 | nxp:NX_Q13561-2
WSVDSIHGK	41	3	| nxp:NX_Q9HBI1-3 | nxp:NX_Q9HBI1-1 | nxp:NX_Q9HBI1-2
LYGPDVGQPR	41	3	| nxp:NX_Q9Y251-2 | nxp:NX_Q9Y251-1 | nxp:NX_Q9Y251-3
GIVGHVAALGEPLNIK	41	2	| nxp:NX_O76074-2 | nxp:NX_O76074-1
VPPEWK	41	2	| nxp:NX_P02671-2 | nxp:NX_P02671-1
YIETDPANR	41	2	| nxp:NX_P06396-3 | nxp:NX_P06396-1
FASCFYGPFR	41	2	| nxp:NX_P13716-1 | nxp:NX_P13716-2
RAEFTVETR	41	2	| nxp:NX_P21333-2 | nxp:NX_P21333-1
CAPGVVGPAEADIDFDIIR	41	2	| nxp:NX_P21333-2 | nxp:NX_P21333-1
LGVTANDVK	41	2	| nxp:NX_P40925-1 | nxp:NX_P40925-3
LTLSALVDGK	41	2	| nxp:NX_P45880-3 | nxp:NX_P45880-1
PEEHPVLLTEAPLNPK	41	2	| nxp:NX_P63261-1 | nxp:NX_P60709-1
GAFGEVQLVR	41	2	| nxp:NX_Q13464-1 | nxp:NX_O75116-1
NPITGFGK	41	2	| nxp:NX_Q13642-5 | nxp:NX_Q13642-4
QGNMTAALQAALK	41	1	| nxp:NX_O15511-1
STVQWEEVCRPWVSGHR	41	1	| nxp:NX_P00488-1
KETFDVTLEPLSFKK	41	1	| nxp:NX_P00488-1
RPCFSALEVDETYVPK	41	1	| nxp:NX_P02768-1
GTHCNQVEVIATLKDGR	41	1	| nxp:NX_P02775-1
TVPPAVTGITFLSGGQSEEEASINLNAINK	41	1	| nxp:NX_P04075-2
LHLDYIGPCK	41	1	| nxp:NX_P09486-1
TDLFPK	41	1	| nxp:NX_P10124-1
GEYEEHLGILGPIIR	41	1	| nxp:NX_P12259-1
NFFNPPIISR	41	1	| nxp:NX_P12259-1
QVILTLQPTLVAVGK	41	1	| nxp:NX_P13598-1
LQVNLLVKPSEK	41	1	| nxp:NX_P16671-1
AFASPVENPDNYCFCTEK	41	1	| nxp:NX_P16671-1
HTLADNFNPVSEER	41	1	| nxp:NX_P20645-1
DRPFFPGLVK	41	1	| nxp:NX_P22392-2
DVFSSTGCKPNPSR	41	1	| nxp:NX_P24557-1
NLSQILSDR	41	1	| nxp:NX_P27105-1
KIPNPDFF	41	1	| nxp:NX_P27824-1
LPFPIIDDR	41	1	| nxp:NX_P30041-1
GTAVVNGEFK	41	1	| nxp:NX_P30048-1
LAPEYEAAATR	41	1	| nxp:NX_P30101-1
FQSLNADINKR	41	1	| nxp:NX_P30740-1
GELANEVK	41	1	| nxp:NX_P35579-1
RQLEEAEEEAQR	41	1	| nxp:NX_P35579-1
SFLSQGQVLK	41	1	| nxp:NX_P48047-1
ITDSAGHILYSK	41	1	| nxp:NX_P49755-1
IYVGNASVAQDIPK	41	1	| nxp:NX_P51452-1
AENQVLAM(15.9949)R	41	1	| nxp:NX_P51572-2
FQFDGDKK	41	1	| nxp:NX_P52209-1
WVPEITHHCPK	41	1	| nxp:NX_P60953-2
NIDEHANEDVER	41	1	| nxp:NX_P61026-1
VEHSDLSFSK	41	1	| nxp:NX_P61769-1
IAALVIDNGSGMCK	41	1	| nxp:NX_P63261-1
TTSLILPGIIK	41	1	| nxp:NX_Q02108-1
VPATLQVLQTLPEENYQVLR	41	1	| nxp:NX_Q07960-1
TLEQTGHVSSENK	41	1	| nxp:NX_Q13576-1
LPDSPALAK	41	1	| nxp:NX_Q13586-1
AEQSLHDLQER	41	1	| nxp:NX_Q13586-1
QIDLLTYCNLVHGR	41	1	| nxp:NX_Q15762-1
ILETTTFFQR	41	1	| nxp:NX_Q9NYU2-1
LEGHELPNELPAHLLPPSK	41	1	| nxp:NX_Q9NZN3-1
AAAAIEAAAK	41	1	| nxp:NX_Q9Y490-1
ALDGAFTEENR	41	1	| nxp:NX_Q9Y490-1
VTFLPTGITFK	41	1	| nxp:NX_Q9Y624-1
YLYEIAR	41	1	nxp:NX_P02768-1
IKFEM(15.9949)EQNLR	41	1	nxp:NX_P35527-1
EITALAPSTM(15.9949)K	40	6	| nxp:NX_P63261-1 | nxp:NX_P63267-1 | nxp:NX_P68133-1 | nxp:NX_P62736-1 | nxp:NX_P68032-1 | nxp:NX_P60709-1
DRHPEEGVVAELQGFAVDK	40	6	| nxp:NX_Q96DZ9-4 | nxp:NX_Q96DZ9-5 | nxp:NX_Q96DZ9-3 | nxp:NX_Q96DZ9-6 | nxp:NX_Q96DZ9-2 | nxp:NX_Q96DZ9-1
DFNPTATVK	40	4	| nxp:NX_P19367-4 | nxp:NX_P19367-2 | nxp:NX_P19367-1 | nxp:NX_P19367-3
VILEGELER	40	4	| nxp:NX_P67936-1 | nxp:NX_P07951-2 | nxp:NX_P67936-2 | nxp:NX_P07951-1
VTVLELFR	40	3	| nxp:NX_P11169-1 | nxp:NX_Q8TDB8-2 | nxp:NX_Q8TDB8-1
HLTPEPDIVASTK	40	3	| nxp:NX_Q5JSH3-4 | nxp:NX_Q5JSH3-2 | nxp:NX_Q5JSH3-1
GLDHDFGPSR	40	3	| nxp:NX_Q9UDY2-6 | nxp:NX_Q9UDY2-1 | nxp:NX_Q9UDY2-7
ITQCSVEIQR	40	2	| nxp:NX_O15400-2 | nxp:NX_O15400-1
VHVSEEGTEPE	40	2	| nxp:NX_P06396-3 | nxp:NX_P06396-1
LHSFLGDDVFLR	40	2	| nxp:NX_P06737-2 | nxp:NX_P06737-1
PVAVALDTK	40	2	| nxp:NX_P14618-1 | nxp:NX_P14618-2
LLAVAATAPPDAPNREEVFDER	40	2	| nxp:NX_P18206-2 | nxp:NX_P18206-1
ATGTIQEDYLR	40	2	| nxp:NX_P19105-1 | nxp:NX_O14950-1
AEFTVETR	40	2	| nxp:NX_P21333-2 | nxp:NX_P21333-1
LQVEPAVDTSGVQCYGPGIEGQGVFR	40	2	| nxp:NX_P21333-2 | nxp:NX_P21333-1
CSGPGLSPGMVR	40	2	| nxp:NX_P21333-2 | nxp:NX_P21333-1
EGVVHGVATVAEK	40	2	| nxp:NX_P37840-2 | nxp:NX_P37840-1
GFSVVADTPELQR	40	2	| nxp:NX_Q14847-1 | nxp:NX_Q14847-2
HPEELSLLR	40	2	| nxp:NX_Q86UX7-2 | nxp:NX_Q86UX7-1
FKYYSFFDLDPK	40	2	| nxp:NX_Q86UX7-2 | nxp:NX_Q86UX7-1
LQHAAELIK	40	2	| nxp:NX_Q8WUM4-1 | nxp:NX_Q8WUM4-2
HRHPECYVCTDCGTNLK	40	1	| nxp:NX_O00151-1
RDHALLEEQSK	40	1	| nxp:NX_O43707-1
EAPSLRPAPPPISGGGYR	40	1	| nxp:NX_P02675-1
HPYFYAPELLFFAK	40	1	| nxp:NX_P02768-1
ADVLTTGAGNPVGDKLNVITVGPR	40	1	| nxp:NX_P04040-1
AAYFGIYDTAK	40	1	| nxp:NX_P05141-1
RPPLCYHNGVQY	40	1	| nxp:NX_P07996-1
HLEINPDHPIVETLR	40	1	| nxp:NX_P08238-1
SINPDEAVAYGAAVQAAILSGDK	40	1	| nxp:NX_P11142-1
STCQFICDEGYSLSGPER	40	1	| nxp:NX_P16109-1
GQVFDVGPR	40	1	| nxp:NX_P28482-1
NFSDNQLQEGK	40	1	| nxp:NX_P37802-1
LSSTWEGIQAGK	40	1	| nxp:NX_P37837-1
LTSEPQPQR	40	1	| nxp:NX_P61106-1
NFLDLISSSGR	40	1	| nxp:NX_Q14644-1
LAATNALLNSLEFTK	40	1	| nxp:NX_Q14974-1
IQRPPEDSIQPYEK	40	1	| nxp:NX_Q16851-1
ETIELVHTEPTDVAQLPSR	40	1	| nxp:NX_Q6IBS0-1
QHDAASLLK	40	1	| nxp:NX_Q8N392-1
NILDSKPTANK	40	1	| nxp:NX_Q9ULV4-1
VGIVAWHPTAR	40	1	| nxp:NX_Q9ULV4-1
LASEAKPAAVAAE	40	1	| nxp:NX_Q9Y490-1
SGGGGGGGLGSGGSIR	40	1	nxp:NX_P35527-1
TVGQLYK	39	9	| nxp:NX_P35579-1 | nxp:NX_P35580-1 | nxp:NX_P35580-2 | nxp:NX_P35580-3 | nxp:NX_P35580-4 | nxp:NX_P35749-4 | nxp:NX_P35749-3 | nxp:NX_P35749-1 | nxp:NX_P35749-2
AGGPGLER	39	8	| nxp:NX_O75369-6 | nxp:NX_O75369-3 | nxp:NX_O75369-2 | nxp:NX_O75369-9 | nxp:NX_O75369-1 | nxp:NX_O75369-8 | nxp:NX_P21333-2 | nxp:NX_P21333-1
CAPFFYGGCGGNR	39	5	| nxp:NX_P05067-7 | nxp:NX_P05067-11 | nxp:NX_P05067-8 | nxp:NX_P05067-9 | nxp:NX_P05067-1
NILPFDHSR	39	4	| nxp:NX_P29350-1 | nxp:NX_P29350-3 | nxp:NX_P29350-2 | nxp:NX_P29350-4
VGDQVTHIR	39	4	| nxp:NX_P29350-1 | nxp:NX_P29350-3 | nxp:NX_P29350-2 | nxp:NX_P29350-4
AANILVGENLVCK	39	3	| nxp:NX_P12931-1 | nxp:NX_P07947-1 | nxp:NX_P12931-2
IYHPNIDEK	39	3	| nxp:NX_P68036-2 | nxp:NX_P68036-1 | nxp:NX_P68036-3
HLLGVEDLLQK	39	3	| nxp:NX_Q01082-3 | nxp:NX_Q01082-2 | nxp:NX_Q01082-1
FLILLGSPK	39	3	| nxp:NX_Q9Y251-2 | nxp:NX_Q9Y251-1 | nxp:NX_Q9Y251-3
TGAQELLR	39	2	| nxp:NX_P06396-3 | nxp:NX_P06396-1
YESLTDPSKLDSGK	39	2	| nxp:NX_P08238-1 | nxp:NX_P07900-2
TATESFASDPILYRPVAVALDTK	39	2	| nxp:NX_P14618-1 | nxp:NX_P14618-2
IANLQTDLSDGLR	39	2	| nxp:NX_P21333-2 | nxp:NX_P21333-1
THIQDNHDGTYTVAYVPDVTGR	39	2	| nxp:NX_P21333-2 | nxp:NX_P21333-1
AYGPGIEPTGNMVK	39	2	| nxp:NX_P21333-2 | nxp:NX_P21333-1
LINDCHGSVSEASSEQK	39	2	| nxp:NX_P50851-2 | nxp:NX_P50851-1
IVAEEFLK	39	2	| nxp:NX_P59998-1 | nxp:NX_P59998-3
WLLLTGISAQQNR	39	2	| nxp:NX_Q00610-2 | nxp:NX_Q00610-1
LEGFHTQISK	39	2	| nxp:NX_Q06323-1 | nxp:NX_Q06323-2
EPIPSLEAIYLLSPTEK	39	2	| nxp:NX_Q15833-2 | nxp:NX_Q15833-1
GHFFVEDQIYCEK	39	1	| nxp:NX_O00151-1
VAWVSHDSTVCLADADKK	39	1	| nxp:NX_O15143-1
NCFASVFEK	39	1	| nxp:NX_O15144-1
LDGAHAPELTK	39	1	| nxp:NX_O76003-1
LIASMSSDSLR	39	1	| nxp:NX_P00488-1
YDPSLKPLSVSYDQATSLR	39	1	| nxp:NX_P00918-1
CPLLKPWAL	39	1	| nxp:NX_P04075-2
IGDTVSFSIEAK	39	1	| nxp:NX_P05106-1
SGKYDLDFK	39	1	| nxp:NX_P06733-1
SCVLPQTK	39	1	| nxp:NX_P08514-1
AEAQVELR	39	1	| nxp:NX_P08514-1
VEGFPTIYFAPSGDKK	39	1	| nxp:NX_P13667-1
LLCGLLAER	39	1	| nxp:NX_P14174-1
ALTNEAENWADNEPNNKR	39	1	| nxp:NX_P16109-1
KLDPGSEETQTLVR	39	1	| nxp:NX_P26641-1
GFPTIYFSPANK	39	1	| nxp:NX_P30101-1
SCDFLSSFR	39	1	| nxp:NX_P35237-1
IAQLEEQLDNETK	39	1	| nxp:NX_P35579-1
SVQTFADK	39	1	| nxp:NX_P47756-2
LILPHVDIQLK	39	1	| nxp:NX_P48735-1
LKDELASTK	39	1	| nxp:NX_P51572-2
EFNKYDTDGSK	39	1	| nxp:NX_P61158-1
MFLSFPTTK	39	1	| nxp:NX_P69905-1
GTNFVVDQSQAVK	39	1	| nxp:NX_Q13418-1
IIHGQDFDQR	39	1	| nxp:NX_Q14344-1
DKNQDLCQQEAVK	39	1	| nxp:NX_Q14554-1
LEHEYIQNFK	39	1	| nxp:NX_Q15691-1
AVEQNTLQEFLK	39	1	| nxp:NX_Q9H299-1
NNIHDLVSEYQQFQDAK	39	1	| nxp:NX_Q9H4B7-1
VSEHFSAM(15.9949)FK	39	1	| nxp:NX_Q9H4B7-1
LSLLEVGCGTGANFK	39	1	| nxp:NX_Q9H8H3-1
GAAAHPDSEEQQQR	39	1	| nxp:NX_Q9Y490-1
ASNPEFSSIPAQISPEGR	39	1	| nxp:NX_Q9Y490-1
CETAIAALNSCLR	39	1	| nxp:NX_Q9Y490-1
AVETAFNGR	39	1	| nxp:NX_Q9Y6C2-1
SPAPKPSDLRPGDVSSK	38	6	| nxp:NX_Q05682-5 | nxp:NX_Q05682-4 | nxp:NX_Q05682-3 | nxp:NX_Q05682-6 | nxp:NX_Q05682-2 | nxp:NX_Q05682-1
IIHEDGYSEEECR	38	4	| nxp:NX_P04899-3 | nxp:NX_P04899-2 | nxp:NX_P04899-1 | nxp:NX_P04899-4
MGVPICGACR	38	4	| nxp:NX_P48059-3 | nxp:NX_P48059-5 | nxp:NX_P48059-2 | nxp:NX_P48059-4
AM(15.9949)NNSWHPECFR	38	4	| nxp:NX_P48059-4 | nxp:NX_P48059-2 | nxp:NX_P48059-5 | nxp:NX_P48059-3
LVILEGELER	38	4	| nxp:NX_P67936-1 | nxp:NX_P07951-2 | nxp:NX_P67936-2 | nxp:NX_P07951-1
TQSSLVPALTDFVR	38	2	| nxp:NX_O60888-1 | nxp:NX_O60888-2
SGIFTNTK	38	2	| nxp:NX_P02671-2 | nxp:NX_P02671-1
TIDDLEDKLK	38	2	| nxp:NX_P06753-5 | nxp:NX_P06753-2
SCAGTLVDCGR	38	2	| nxp:NX_P13224-1 | nxp:NX_P13224-2
IPTISTQLK	38	2	| nxp:NX_P18206-2 | nxp:NX_P18206-1
VGKETVQTTEDQILKR	38	2	| nxp:NX_P18206-2 | nxp:NX_P18206-1
NEQHVPGSPFTAR	38	2	| nxp:NX_P21333-2 | nxp:NX_P21333-1
DAIAQAVR	38	2	| nxp:NX_P29401-1 | nxp:NX_P29401-2
NAGLAFIELVNEGR	38	2	| nxp:NX_P50851-2 | nxp:NX_P50851-1
LASTLVHLGEYQAAVDGAR	38	2	| nxp:NX_Q00610-2 | nxp:NX_Q00610-1
EHIYDLR	38	2	| nxp:NX_Q14677-1 | nxp:NX_Q14677-3
QQLQGVNVCGGR	38	2	| nxp:NX_Q14766-1 | nxp:NX_Q14766-4
ELEKPIFCLK	38	2	| nxp:NX_Q70J99-1 | nxp:NX_Q70J99-3
EKEPEEELYDLSK	38	2	| nxp:NX_Q86UX7-2 | nxp:NX_Q86UX7-1
SLPEVLQAPVGSSILVQCH	38	2	| nxp:NX_Q86YW5-2 | nxp:NX_Q86YW5-1
MGPGAASGGERPNLK	38	2	| nxp:NX_Q9H0U4-1 | nxp:NX_Q92928-1
TGTLQQLAK	38	2	| nxp:NX_Q9P126-2 | nxp:NX_Q9P126-1
LATGSDDNCAAFFEGPPFK	38	1	| nxp:NX_O75083-1
TLFITGLPR	38	1	| nxp:NX_O94886-1
LAKTYETTLEK	38	1	| nxp:NX_P02768-1
QLSSGVSEIR	38	1	| nxp:NX_P04792-1
IPVGPETLGR	38	1	| nxp:NX_P06576-1
DHENIVIAK	38	1	| nxp:NX_P07237-1
DGHQNNLDNCPYVPNANQADHDK	38	1	| nxp:NX_P07996-1
FQDLVDAVR	38	1	| nxp:NX_P07996-1
CGACPPGYSGNGIQCTDVDECK	38	1	| nxp:NX_P07996-1
FGSAIAPLGDLDR	38	1	| nxp:NX_P08514-1
NVLVTLYER	38	1	| nxp:NX_P09486-1
ISSIQSIVPALEIANAHR	38	1	| nxp:NX_P10809-1
HLEIIYAINQR	38	1	| nxp:NX_P11216-1
WAELLPLLQQCQVVR	38	1	| nxp:NX_P13489-1
SGYLLPDTK	38	1	| nxp:NX_P14625-1
LWLEDRTPEALLQVR	38	1	| nxp:NX_P14770-1
SLHDALCVVK	38	1	| nxp:NX_P17987-1
YQQAGLPLIVLAGK	38	1	| nxp:NX_P21399-1
YGYTHLSAGELLR	38	1	| nxp:NX_P30085-1
VVVAENFDEIVNNENK	38	1	| nxp:NX_P30101-1
SGGGGDIHQGFQSLLTEVNK	38	1	| nxp:NX_P35237-1
QELEEICHDLEAR	38	1	| nxp:NX_P35579-1
CELINALYPEGQAPVKK	38	1	| nxp:NX_P37802-1
NVIGLQMGTNR	38	1	| nxp:NX_P37802-1
DKPHVNVGTIGHVDHGK	38	1	| nxp:NX_P49411-1
HHITPLLSAVYEGHVSCVK	38	1	| nxp:NX_P58546-1
KTETQEKNPLPSK	38	1	| nxp:NX_P62328-1
NPLPSKETIEQEK	38	1	| nxp:NX_P62328-1
TPSSTGPSPVFDIK	38	1	| nxp:NX_Q12913-1
LAFESENINSEIHCDR	38	1	| nxp:NX_Q13201-1
SSDILSVLK	38	1	| nxp:NX_Q13576-1
NIHQSVSEQIK	38	1	| nxp:NX_Q14012-1
LDNVPHTPSSYIETLPK	38	1	| nxp:NX_Q99733-1
VDCDQHSDIAQR	38	1	| nxp:NX_Q9BS26-1
EIVHIQIGQCGN	38	1	| nxp:NX_Q9H4B7-1
LSQNNFALGYK	38	1	| nxp:NX_Q9Y277-1
TVTDMLMTICAR	38	1	| nxp:NX_Q9Y490-1
LELLDHVLLTLQKPSPELK	38	1	| nxp:NX_Q9Y490-1
KGIWLEAGK	38	1	| nxp:NX_Q9Y490-1
ITITNDQNR	38	1	nxp:NX_P11021-1
SLPSVETLGCTSVICSDK	37	14	| nxp:NX_P16615-2 | nxp:NX_P16615-5 | nxp:NX_Q93084-4 | nxp:NX_P16615-3 | nxp:NX_Q93084-2 | nxp:NX_P16615-4 | nxp:NX_Q93084-3 | nxp:NX_Q93084-7 | nxp:NX_P16615-1 | nxp:NX_Q93084-1 | nxp:NX_Q93084-6 | nxp:NX_Q93084-5 | nxp:NX_O14983-2 | nxp:NX_O14983-1
TGGLYSCDITAR	37	7	| nxp:NX_P23229-4 | nxp:NX_P23229-2 | nxp:NX_P23229-5 | nxp:NX_P23229-3 | nxp:NX_P23229-9 | nxp:NX_P23229-6 | nxp:NX_P23229-1
RGETESEEFEK	37	6	| nxp:NX_Q05682-5 | nxp:NX_Q05682-4 | nxp:NX_Q05682-3 | nxp:NX_Q05682-6 | nxp:NX_Q05682-2 | nxp:NX_Q05682-1
LASQANIAQVLAELK	37	6	| nxp:NX_Q10567-4 | nxp:NX_Q10567-3 | nxp:NX_Q10567-2 | nxp:NX_Q10567-1 | nxp:NX_P63010-1 | nxp:NX_P63010-2
ITHSPLTICFPEYTGANK	37	4	| nxp:NX_P04899-3 | nxp:NX_P04899-2 | nxp:NX_P04899-1 | nxp:NX_P04899-4
LGLLGLANSLAIEGR	37	3	| nxp:NX_P51659-1 | nxp:NX_P51659-3 | nxp:NX_P51659-2
LVALLNTLDR	37	3	| nxp:NX_Q15257-3 | nxp:NX_Q15257-2 | nxp:NX_Q15257-1
NCGQTVHDEVANK	37	2	| nxp:NX_O14964-2 | nxp:NX_O14964-1
LQVTNVLSQPLTQATVK	37	2	| nxp:NX_P04844-2 | nxp:NX_P04844-1
LSLTDPLVAER	37	2	| nxp:NX_P13224-1 | nxp:NX_P13224-2
AGCPAPCSCAGTLVDCGR	37	2	| nxp:NX_P13224-1 | nxp:NX_P13224-2
GVNLPGAAVDLPAVSEK	37	2	| nxp:NX_P14618-1 | nxp:NX_P14618-2
DAGEGLLAVQITDPEGKPK	37	2	| nxp:NX_P21333-2 | nxp:NX_P21333-1
VTFAGVPIPR	37	2	| nxp:NX_P21333-2 | nxp:NX_P21333-1
SLHETSSVFVDSLTK	37	2	| nxp:NX_P21333-2 | nxp:NX_P21333-1
FAEHVFR	37	2	| nxp:NX_P37235-1 | nxp:NX_P84074-1
TKEGVVHGVATVAEK	37	2	| nxp:NX_P37840-2 | nxp:NX_P37840-1
ATQLLEGLVQELQK	37	2	| nxp:NX_P51692-1 | nxp:NX_P42229-1
KDPELWGSVLLESNPYR	37	2	| nxp:NX_Q00610-2 | nxp:NX_Q00610-1
AHIAQLCEK	37	2	| nxp:NX_Q00610-2 | nxp:NX_Q00610-1
SVFPLSVSDSPAR	37	2	| nxp:NX_Q70J99-1 | nxp:NX_Q70J99-3
ALIFVSHGAGEHSGR	37	2	| nxp:NX_Q99685-2 | nxp:NX_Q99685-1
HEQILVLDPPTDLK	37	2	| nxp:NX_Q9P0L0-1 | nxp:NX_Q9P0L0-2
LDYYDSHNVNTR	37	1	| nxp:NX_O43707-1
KDDPVTNLNNAFEVAEK	37	1	| nxp:NX_O43707-1
ASLASALVEGEIAEEAAEK	37	1	| nxp:NX_O95810-1
NVNIFK	37	1	| nxp:NX_P00338-3
ELNYFAK	37	1	| nxp:NX_P00558-1
ATEHLSTLSEK	37	1	| nxp:NX_P02647-1
AHYGGFTVQNEANKY	37	1	| nxp:NX_P02675-1
TVQNEANKYQISVNK	37	1	| nxp:NX_P02675-1
QTALVELVK	37	1	| nxp:NX_P02768-1
AAFTECCQAADK	37	1	| nxp:NX_P02768-1
KPVEEYANCHLAR	37	1	| nxp:NX_P02787-1
SGEPQTFTLK	37	1	| nxp:NX_P05556-1
ELHINLIPNKQDR	37	1	| nxp:NX_P07900-2
GFLLLASLR	37	1	| nxp:NX_P07996-1
LCNSPSPQM(15.9949)NGKPCEGEAR	37	1	| nxp:NX_P07996-1
VAIVVGAPR	37	1	| nxp:NX_P08514-1
VSEEHDVLR	37	1	| nxp:NX_P14317-1
EAEAAIYHLQLFEELR	37	1	| nxp:NX_P14618-1
LGVIEDHSNR	37	1	| nxp:NX_P14625-1
ARPEDVISEGR	37	1	| nxp:NX_P25325-1
GTLTEAFPVLGGK	37	1	| nxp:NX_P29144-1
SLNILTAFQK	37	1	| nxp:NX_P30040-1
KIVITDCGQLS	37	1	| nxp:NX_P30405-1
QQHVIETLIGK	37	1	| nxp:NX_P48643-1
LNEHFLNTTDFLDTIK	37	1	| nxp:NX_P48735-1
FQSLGVAFYR	37	1	| nxp:NX_P51149-1
YAVLYQPLFDKR	37	1	| nxp:NX_P55209-1
LGLQNDLFSLAR	37	1	| nxp:NX_P55786-1
KTETQEKNPLPSKE	37	1	| nxp:NX_P62328-1
IIPGFM(15.9949)CQGGDFTR	37	1	| nxp:NX_P62937-1
NVLHEGTNFVVDQSQAVK	37	1	| nxp:NX_Q13418-1
SFLHEQEENVVK	37	1	| nxp:NX_Q13576-1
FNVIQPGPIK	37	1	| nxp:NX_Q16698-1
LDQALVVEHIEK	37	1	| nxp:NX_Q7LDG7-2
NIEEHASSDVER	37	1	| nxp:NX_Q92930-1
LGVLHVGQK	37	1	| nxp:NX_Q9NTJ5-1
YFEITDESPYVHYLNTFSSK	37	1	| nxp:NX_Q9ULV4-1
PETQVVLINAVK	37	1	| nxp:NX_Q9Y490-1
IEEFLEEVLCPPK	37	1	| nxp:NX_Q9Y696-1
GILTLKYPIE	36	6	| nxp:NX_P63261-1 | nxp:NX_P60709-1 | nxp:NX_P63267-1 | nxp:NX_P68133-1 | nxp:NX_P62736-1 | nxp:NX_P68032-1
RKPDTIEVQQMK	36	4	| nxp:NX_P26038-1 | nxp:NX_P35241-4 | nxp:NX_P35241-5 | nxp:NX_P15311-1
LAETLGR	36	4	| nxp:NX_P48059-4 | nxp:NX_P48059-2 | nxp:NX_P48059-5 | nxp:NX_P48059-3
VQEGYTCDCFDGYHLDTAK	36	4	| nxp:NX_Q14766-3 | nxp:NX_Q14766-1 | nxp:NX_Q14766-4 | nxp:NX_Q14766-2
SSAFGTLNWFTK	36	4	| nxp:NX_Q4KMQ2-3 | nxp:NX_Q4KMQ2-1 | nxp:NX_Q4KMQ2-4 | nxp:NX_Q4KMQ2-2
DPDQTDGLGLSYLSSHIANVER	36	2	| nxp:NX_P06396-3 | nxp:NX_P06396-1
APNDFNLR	36	2	| nxp:NX_P06737-2 | nxp:NX_P06737-1
DISPVLKDPASFR	36	2	| nxp:NX_P07741-2 | nxp:NX_P07741-1
CPAPCSCAGTLVDCGR	36	2	| nxp:NX_P13224-1 | nxp:NX_P13224-2
NQGIEEALK	36	2	| nxp:NX_P18206-2 | nxp:NX_P18206-1
VSLVLAPALAACGCK	36	2	| nxp:NX_P19971-1 | nxp:NX_P19971-2
LLAITELLQQK	36	2	| nxp:NX_P20936-2 | nxp:NX_P20936-1
VYGPGVAK	36	2	| nxp:NX_P21333-2 | nxp:NX_P21333-1
AGVAPLQVK	36	2	| nxp:NX_P21333-2 | nxp:NX_P21333-1
VEVTYDGVPVPGSPFPLEAVAPTKPSK	36	2	| nxp:NX_P21333-2 | nxp:NX_P21333-1
VIVVGNPANTNCLTASK	36	2	| nxp:NX_P40925-1 | nxp:NX_P40925-3
VQYAPERPGPQPTAETTR	36	2	| nxp:NX_P49407-2 | nxp:NX_P49407-1
NPLGSTHPEATLK	36	2	| nxp:NX_P50851-2 | nxp:NX_P50851-1
FEAPEALFQPH	36	2	| nxp:NX_P61160-1 | nxp:NX_P61160-2
HLWDYTFGPEK	36	2	| nxp:NX_P61160-1 | nxp:NX_P61160-2
LCYVGYNIEQEQK	36	2	| nxp:NX_P61160-1 | nxp:NX_P61160-2
LTPITYPQGLAMAK	36	2	| nxp:NX_P63000-1 | nxp:NX_P63000-2
APEEHPVLLTEAPLNPK	36	2	| nxp:NX_P63261-1 | nxp:NX_P60709-1
HVDWVK	36	2	| nxp:NX_Q01518-2 | nxp:NX_Q01518-1
TQDQISNIK	36	2	| nxp:NX_Q14847-1 | nxp:NX_Q14847-2
YYVTIIDAPGHR	36	2	| nxp:NX_Q5VTE0-1 | nxp:NX_P68104-1
SAPTDVLDSLTTIPELK	36	2	| nxp:NX_Q86UX7-2 | nxp:NX_Q86UX7-1
YNFFTGCPK	36	2	| nxp:NX_Q99832-1 | nxp:NX_Q99832-4
IGCYVTIFQNISNLR	36	2	| nxp:NX_Q9UBW5-2 | nxp:NX_Q9UBW5-1
FETSAATGQNVEK	36	1	| nxp:NX_O00194-1
IYDLNIPAFVK	36	1	| nxp:NX_O43639-1
VYIASSSGSTAIK	36	1	| nxp:NX_O75368-1
YSLEPVAVELK	36	1	| nxp:NX_P00558-1
ICLDLQAPLYKK	36	1	| nxp:NX_P02776-1
LGPNYLHIPVNCPYR	36	1	| nxp:NX_P04040-1
VINGNPITIFQER	36	1	| nxp:NX_P04406-1
SKVELEVR	36	1	| nxp:NX_P05106-1
GALHDENTCNR	36	1	| nxp:NX_P05106-1
LSENNIQTIFAVTEEFQPVYK	36	1	| nxp:NX_P05556-1
KGCPPDDIENPR	36	1	| nxp:NX_P05556-1
GICECGVCK	36	1	| nxp:NX_P05556-1
SSEVAVIGFFK	36	1	| nxp:NX_P07237-1
LTSLPLGALR	36	1	| nxp:NX_P07359-1
YLFLQPR	36	1	| nxp:NX_P08514-1
HHCPSTPIILVGTK	36	1	| nxp:NX_P15153-1
ESKKEDLVFIFWAPESAPLK	36	1	| nxp:NX_P23528-1
HVVQSISTQQEK	36	1	| nxp:NX_P24539-1
LM(15.9949)SNLDSNR	36	1	| nxp:NX_P26447-1
DDEFTHLYTLIVRPDNTYEVK	36	1	| nxp:NX_P27797-1
ATAVVDGAFK	36	1	| nxp:NX_P32119-1
VRTELADKVTK	36	1	| nxp:NX_P35579-1
GPAYGLSR	36	1	| nxp:NX_P37802-1
LINALYPEGQAPVK	36	1	| nxp:NX_P37802-1
YLGVTLSPR	36	1	| nxp:NX_P40197-1
HKLDVTSVEDYK	36	1	| nxp:NX_P48643-1
VAIEHLDK	36	1	| nxp:NX_P48643-1
TIFQGIAAK	36	1	| nxp:NX_P52209-1
FITHAPPGEFNEVFNDVR	36	1	| nxp:NX_P52907-1
LEILQIHTK	36	1	| nxp:NX_P55072-1
IINEVSKPLAHHIPVEK	36	1	| nxp:NX_P55145-1
VAHALAEGLGVIACIGEK	36	1	| nxp:NX_P60174-3
VVSSIEQK	36	1	| nxp:NX_P63104-1
VADALTNAVAH	36	1	| nxp:NX_P69905-1
TIAQDYGVLK	36	1	| nxp:NX_Q06830-1
NIQTSESHPLR	36	1	| nxp:NX_Q12913-1
LSPTVILDNQVTYVPGGK	36	1	| nxp:NX_Q13201-1
LGIAPQIQDLLGK	36	1	| nxp:NX_Q13576-1
NLLYVADSYNHK	36	1	| nxp:NX_Q8NBF2-1
LQLFGQDFSHAAR	36	1	| nxp:NX_Q92619-1
LVTLPVSFAQLK	36	1	| nxp:NX_Q96AG4-1
FCNPGFPIGCYITDK	36	1	| nxp:NX_Q99805-1
SGYPDIGFPLFPLSK	36	1	| nxp:NX_Q9C0C9-1
IENVLEVVR	36	1	| nxp:NX_Q9H4B7-1
YTFAPSVSLNK	36	1	| nxp:NX_Q9NR12-1
PAVQAIVLDTASDVLDK	36	1	| nxp:NX_Q9Y490-1
SAGGLIQTAR	36	1	| nxp:NX_Q9Y490-1
LEDEGGSGRPLLQAAK	36	1	| nxp:NX_Q9Y490-1
TLNDM(15.9949)RQEYEQLIAK	36	1	nxp:NX_P35527-1
IEWLESHQDADIEDFK	36	1	nxp:NX_P11021-1
NQLTSNPENTVFDAK	36	1	nxp:NX_P11021-1
INEWLTK	35	6	| nxp:NX_Q05682-5 | nxp:NX_Q05682-4 | nxp:NX_Q05682-3 | nxp:NX_Q05682-6 | nxp:NX_Q05682-2 | nxp:NX_Q05682-1
GIHETTFNSIM(15.9949)K	35	5	| nxp:NX_P63261-1 | nxp:NX_Q562R1-1 | nxp:NX_A5A3E0-1 | nxp:NX_Q6S8J3-1 | nxp:NX_P60709-1
FASFIDKVR	35	4	nxp:NX_P04259-1 | nxp:NX_P35908-1 | nxp:NX_P04264-1 | nxp:NX_Q9NSB2-1 |
ISEQFTAM(15.9949)FR	35	4	| nxp:NX_P07437-1 | nxp:NX_P68371-1 | nxp:NX_Q13509-1 | nxp:NX_P04350-1
ISEQFTAMFR	35	4	| nxp:NX_P07437-1 | nxp:NX_P68371-1 | nxp:NX_Q13509-1 | nxp:NX_P04350-1
CDLCQEVLADIGFVK	35	4	| nxp:NX_P48059-4 | nxp:NX_P48059-2 | nxp:NX_P48059-5 | nxp:NX_P48059-3
YLQQLAEKPLETR	35	4	| nxp:NX_Q01433-1 | nxp:NX_Q01433-3 | nxp:NX_Q01433-2 | nxp:NX_Q01433-4
QEYDESGPSIVHRK	35	3	| nxp:NX_P63261-1 | nxp:NX_A5A3E0-1 | nxp:NX_Q6S8J3-1
STTTGHLIYK	35	3	| nxp:NX_Q5VTE0-1 | nxp:NX_P68104-1 | nxp:NX_Q05639-1
ARPEDVVNLDLKSTLR	35	3	| nxp:NX_Q9HBI1-3 | nxp:NX_Q9HBI1-1 | nxp:NX_Q9HBI1-2
VLYNLFTK	35	3	| nxp:NX_Q9HBI1-3 | nxp:NX_Q9HBI1-1 | nxp:NX_Q9HBI1-2
EYVNVSQELHPGAAK	35	2	| nxp:NX_O43561-2 | nxp:NX_O43561-1
GQAAVQQLQAEGLSPR	35	2	| nxp:NX_O75828-1 | nxp:NX_P16152-1
FDHDEGDQCSR	35	2	| nxp:NX_O76074-2 | nxp:NX_O76074-1
QFTSSTSYNR	35	2	| nxp:NX_P02671-2 | nxp:NX_P02671-1
RLDGSVDFKK	35	2	| nxp:NX_P02679-2 | nxp:NX_P02679-1
VFEGNRPTNSIVFTK	35	2	| nxp:NX_P06744-1 | nxp:NX_P06744-2
KTLLSNLEEAK	35	2	| nxp:NX_P10909-5 | nxp:NX_P10909-2
LAEVALAYAK	35	2	| nxp:NX_P13716-1 | nxp:NX_P13716-2
GAPGPGPADASK	35	2	| nxp:NX_P21333-2 | nxp:NX_P21333-1
ALDVGSGSGILTACFAR	35	2	| nxp:NX_P22061-1 | nxp:NX_P22061-2
VQLVVGDGR	35	2	| nxp:NX_P22061-1 | nxp:NX_P22061-2
FQHGVIAAVDSR	35	2	| nxp:NX_P28062-2 | nxp:NX_P28062-1
TLIQNCGASTIR	35	2	| nxp:NX_P49368-1 | nxp:NX_P49368-2
TLDLPIYVTR	35	2	| nxp:NX_P53621-1 | nxp:NX_P53621-2
YSFTTTAER	35	2	| nxp:NX_P63261-1 | nxp:NX_P60709-1
LLYNNVSNFGR	35	2	| nxp:NX_Q00610-2 | nxp:NX_Q00610-1
AQINQGESITHALK	35	2	| nxp:NX_Q01518-2 | nxp:NX_Q01518-1
DCFTCSNCK	35	2	| nxp:NX_Q13642-5 | nxp:NX_Q13642-4
DAQHYGGWEHR	35	2	| nxp:NX_Q14697-1 | nxp:NX_Q14697-2
GSFSEQGINEFLR	35	2	| nxp:NX_Q15084-1 | nxp:NX_Q15084-2
QWNVNWDIR	35	2	| nxp:NX_Q86UX7-2 | nxp:NX_Q86UX7-1
GSAPTDVLDSLTTIPELK	35	2	| nxp:NX_Q86UX7-2 | nxp:NX_Q86UX7-1
VAHSDKPGSTSTASFR	35	2	| nxp:NX_Q9P0L0-1 | nxp:NX_Q9P0L0-2
TTPPVLDSDGSFFLYSK	35	1	| nxp:NX_P01857-1 |
SLTTAFFR	35	1	| nxp:NX_O00194-1
ICDQWDALGSLTHSR	35	1	| nxp:NX_O43707-1
QLEAIDQLHLEYAK	35	1	| nxp:NX_O43707-1
GNNFLYTNGK	35	1	| nxp:NX_O75083-1
YICENQDSISSK	35	1	| nxp:NX_P02768-1
CLDLQAPLYK	35	1	| nxp:NX_P02776-1
CPLLKPWALT	35	1	| nxp:NX_P04075-2
GILAADESTGSIAK	35	1	| nxp:NX_P04075-2
QLLLTADDR	35	1	| nxp:NX_P04075-2
ILGGVISAISEAAAQYNPEPPPPR	35	1	| nxp:NX_P04632-1
IVVVTAGVR	35	1	| nxp:NX_P07195-1
WLQDNAENVYVWK	35	1	| nxp:NX_P07359-1
YVNGLTLGGQK	35	1	| nxp:NX_P07737-1
RAPFDLFENR	35	1	| nxp:NX_P07900-2
LCNSPSPQMNGKPCEGEAR	35	1	| nxp:NX_P07996-1
NNEEWTVDSCTECHCQNSVTICK	35	1	| nxp:NX_P07996-1
SITLFVQEDR	35	1	| nxp:NX_P07996-1
EQNSLDSWGPK	35	1	| nxp:NX_P08514-1
VVLCELGNPMKK	35	1	| nxp:NX_P08514-1
VCLLGCGISTGYGAAVNTAK	35	1	| nxp:NX_P11766-1
WIISSLTPK	35	1	| nxp:NX_P12259-1
TVDNFVALATGEK	35	1	| nxp:NX_P23284-1
QVLVENFSNFTNR	35	1	| nxp:NX_P24557-1
LELAQYR	35	1	| nxp:NX_P25705-1
CKDDEFTHLYTLIVRPDNTYEVK	35	1	| nxp:NX_P27797-1
THLPGFVEQAEALK	35	1	| nxp:NX_P30044-1
EATTNAPFR	35	1	| nxp:NX_P30740-1
NAEQYKDQADKASTR	35	1	| nxp:NX_P35579-1
SHLLGINVTDFTR	35	1	| nxp:NX_P35579-1
ALELDSNLYR	35	1	| nxp:NX_P35579-1
HSQAVEELAEQLE	35	1	| nxp:NX_P35579-1
AITDTAYR	35	1	| nxp:NX_P35579-1
LTEVLLGHNSWR	35	1	| nxp:NX_P40197-1
DTSASAVAVGLK	35	1	| nxp:NX_P40939-1
STLNEIYFGK	35	1	| nxp:NX_P47756-2
QELLEEVKK	35	1	| nxp:NX_P50552-1
LLEAHEEQNVDSYTESVK	35	1	| nxp:NX_P54920-1
IIYGGSVTGATCK	35	1	| nxp:NX_P60174-3
KQSLGELIGTLNAAK	35	1	| nxp:NX_P60174-3
FLEHLSGAGK	35	1	| nxp:NX_Q01813-1
VIGNQSLVNELAFTAR	35	1	| nxp:NX_Q13011-1
VHLPNGSPIPAVLLANK	35	1	| nxp:NX_Q13637-1
SAGTGSPQPPSFTYAQQR	35	1	| nxp:NX_Q15942-1
GEEQSAIPYFPFIPDQPFR	35	1	| nxp:NX_Q3ZCW2-1
GSGVTTYSVHPGTVQSELVR	35	1	| nxp:NX_Q8TC12-1
AVAIDLPGLGHSK	35	1	| nxp:NX_Q96IU4-1
IPVDTYNNILTVLK	35	1	| nxp:NX_Q96QK1-1
AATFIGNNTAIQEIFNR	35	1	| nxp:NX_Q9H4B7-1
HGYIPGK	35	1	| nxp:NX_Q9ULV4-1
LTLDTIFVPNTGKK	35	1	| nxp:NX_Q9Y277-1
VEHGSVALPAIMR	35	1	| nxp:NX_Q9Y490-1
LGVRPSQGGEAPR	34	15	| nxp:NX_P02751-12 | nxp:NX_P02751-4 | nxp:NX_P02751-10 | nxp:NX_P02751-6 | nxp:NX_P02751-5 | nxp:NX_P02751-9 | nxp:NX_P02751-14 | nxp:NX_P02751-13 | nxp:NX_P02751-8 | nxp:NX_P02751-17 | nxp:NX_P02751-3 | nxp:NX_P02751-1 | nxp:NX_P02751-11 | nxp:NX_P02751-7 | nxp:NX_P02751-15
IQFVDWCPTGFK	34	8	| nxp:NX_P68366-1 | nxp:NX_Q9NY65-1 | nxp:NX_Q9BQE3-1 | nxp:NX_Q71U36-1 | nxp:NX_P68363-1 | nxp:NX_Q13748-1 | nxp:NX_Q13748-2 | nxp:NX_Q6PEY2-1
AEALPLQR	34	7	| nxp:NX_P23229-4 | nxp:NX_P23229-2 | nxp:NX_P23229-5 | nxp:NX_P23229-3 | nxp:NX_P23229-9 | nxp:NX_P23229-6 | nxp:NX_P23229-1
HTEAIPDPR	34	7	| nxp:NX_Q93084-4 | nxp:NX_Q93084-2 | nxp:NX_Q93084-3 | nxp:NX_Q93084-7 | nxp:NX_Q93084-1 | nxp:NX_Q93084-6 | nxp:NX_Q93084-5
INVLAAQYQSLLNSYGEPVDDK	34	6	| nxp:NX_O00429-4 | nxp:NX_O00429-3 | nxp:NX_O00429-5 | nxp:NX_O00429-2 | nxp:NX_O00429-1 | nxp:NX_O00429-6
EAEGAPQVEAGKR	34	6	| nxp:NX_Q05682-5 | nxp:NX_Q05682-4 | nxp:NX_Q05682-3 | nxp:NX_Q05682-6 | nxp:NX_Q05682-2 | nxp:NX_Q05682-1
IMNTFSVVPSPK	34	4	| nxp:NX_P07437-1 | nxp:NX_P68371-1 | nxp:NX_Q13509-1 | nxp:NX_P04350-1
LEALDANSR	34	4	| nxp:NX_P09496-2 | nxp:NX_P09496-4 | nxp:NX_P09496-3 | nxp:NX_P09496-1
NGFLLDGFPR	34	4	| nxp:NX_P54819-5 | nxp:NX_P54819-2 | nxp:NX_P54819-1 | nxp:NX_P54819-3
LISQIVSSITAS	34	4	| nxp:NX_P68366-1 | nxp:NX_Q9NY65-1 | nxp:NX_Q9BQE3-1 | nxp:NX_P68363-1
TLPLTVTSQQGVK	34	4	| nxp:NX_Q14766-3 | nxp:NX_Q14766-1 | nxp:NX_Q14766-2 | nxp:NX_Q14766-4
GIVNEQFLLQR	34	3	| nxp:NX_P49748-2 | nxp:NX_P49748-1 | nxp:NX_P49748-3
GQVCLPVISAENWKPATK	34	3	| nxp:NX_P68036-2 | nxp:NX_P68036-1 | nxp:NX_P68036-3
HAEATLGSGNLR	34	3	| nxp:NX_Q9H8S9-1 | nxp:NX_Q7L9L4-1 | nxp:NX_Q7L9L4-2
VTLTSEEEAR	34	2	| nxp:NX_P00338-3 | nxp:NX_P00338-4
RLDGSVDFK	34	2	| nxp:NX_P02679-2 | nxp:NX_P02679-1
QIFLGGVDK	34	2	| nxp:NX_P12236-1 | nxp:NX_P05141-1
QDLGSPEGIAVDHLGR	34	2	| nxp:NX_P14543-2 | nxp:NX_P14543-1
TNLLQVCER	34	2	| nxp:NX_P18206-2 | nxp:NX_P18206-1
KDGSCGVAYVVQEPGDYEVSVK	34	2	| nxp:NX_P21333-2 | nxp:NX_P21333-1
FADQHVPGSPFSVK	34	2	| nxp:NX_P21333-2 | nxp:NX_P21333-1
SSFTVDCSK	34	2	| nxp:NX_P21333-2 | nxp:NX_P21333-1
HQPTAIIAK	34	2	| nxp:NX_P29401-1 | nxp:NX_P29401-2
TKEGVLYVGSK	34	2	| nxp:NX_P37840-2 | nxp:NX_P37840-1
VHLTPEEK	34	2	| nxp:NX_P68871-1 | nxp:NX_P02042-1
HELIEFR	34	2	| nxp:NX_Q00610-2 | nxp:NX_Q00610-1
REPIPSLEAIYLLSPTEK	34	2	| nxp:NX_Q15833-2 | nxp:NX_Q15833-1
HFHYEEHLER	34	2	| nxp:NX_Q9H4X1-2 | nxp:NX_Q9H4X1-1
ATDFVVPGPGK	34	1	| nxp:NX_O75874-1
SCSSSCAVHDLIFWR	34	1	| nxp:NX_O95197-3
LVFGFLNGR	34	1	| nxp:NX_P00491-1
FCLDNGAK	34	1	| nxp:NX_P00558-1
GKCECGSCVCIQPGSYGDTCEK	34	1	| nxp:NX_P05106-1
FVNITPAEVGVLVGK	34	1	| nxp:NX_P07737-1
HIYYITGETK	34	1	| nxp:NX_P07900-2
AQGYSGLSVK	34	1	| nxp:NX_P07996-1
TEEEVVAENPCQNHHCK	34	1	| nxp:NX_P09486-1
DCPSPCTCR	34	1	| nxp:NX_P14770-1
LLLLGTSNSGK	34	1	| nxp:NX_P19086-1
FLQEHLAPK	34	1	| nxp:NX_P26440-1
IDDPTDSKPEDWDKPEHIPDPDAK	34	1	| nxp:NX_P27797-1
NYLLSLPHK	34	1	| nxp:NX_P28482-1
ETYPNYLPLYVAR	34	1	| nxp:NX_P29144-1
TVAGQDAVIVLLGTR	34	1	| nxp:NX_P30043-1
NRPTSISWDGLDSGK	34	1	| nxp:NX_P30086-1
TFSHELSDFGLESTAGEIPVVAIR	34	1	| nxp:NX_P30101-1
FPDENFTLK	34	1	| nxp:NX_P30405-1
LDPHNHVLYSNR	34	1	| nxp:NX_P31948-1
QAVEELAEQLEQTKR	34	1	| nxp:NX_P35579-1
AQFEGIVTDLIR	34	1	| nxp:NX_P38646-1
LVRPPVQVYGIEGR	34	1	| nxp:NX_P48047-1
TLLGDGPVVTDPK	34	1	| nxp:NX_P52566-1
AFCEPGNVENNGVLSFIK	34	1	| nxp:NX_P54577-1
FFVGGNWK	34	1	| nxp:NX_P60174-3
LSEELSGGR	34	1	| nxp:NX_P61158-1
KDYEEIGPSICR	34	1	| nxp:NX_P61158-1
EAFSLFDKDGDGTITTK	34	1	| nxp:NX_P62158-1
HTGPGILSMANAGPNTNGSQFFICTAK	34	1	| nxp:NX_P62937-1
LAEVAAGDDKK	34	1	| nxp:NX_P63104-1
KNSVVEASEAAYK	34	1	| nxp:NX_Q04917-1
YCAQDAFFQVK	34	1	| nxp:NX_Q13011-1
SPAIGLNNLDK	34	1	| nxp:NX_Q13576-1
VVAVGYINEAIDEGNPLR	34	1	| nxp:NX_Q13576-1
LVVPATQCGSLIGK	34	1	| nxp:NX_Q15365-1
TVSVLNGGFR	34	1	| nxp:NX_Q16762-1
EIQTTTGNQQVLVR	34	1	| nxp:NX_Q8TC12-1
GENLEHLR	34	1	| nxp:NX_Q9BV40-1
LVQNAAGSQEK	34	1	| nxp:NX_Q9Y490-1
FAGFQCQIQFGPHNEQK	34	1	| nxp:NX_Q9Y490-1
QEDVIATANLSR	34	1	| nxp:NX_Q9Y490-1
VNSLPEVLPILNSDEPK	33	7	| nxp:NX_P23229-4 | nxp:NX_P23229-2 | nxp:NX_P23229-5 | nxp:NX_P23229-3 | nxp:NX_P23229-9 | nxp:NX_P23229-6 | nxp:NX_P23229-1
VNIVPVIAK	33	7	| nxp:NX_Q15019-2 | nxp:NX_Q9UHD8-9 | nxp:NX_Q9UHD8-8 | nxp:NX_Q9UHD8-7 | nxp:NX_Q9UHD8-2 | nxp:NX_Q9UHD8-5 | nxp:NX_Q9UHD8-1
SSTGSPTSPLNAEK	33	6	| nxp:NX_Q15746-4 | nxp:NX_Q15746-5 | nxp:NX_Q15746-2 | nxp:NX_Q15746-3 | nxp:NX_Q15746-6 | nxp:NX_Q15746-1
IGSGCNLDSAR	33	4	| nxp:NX_P07195-1 | nxp:NX_P00338-3 | nxp:NX_P07864-1 | nxp:NX_P00338-4
HIDLVEGDEGR	33	4	| nxp:NX_P19367-4 | nxp:NX_P19367-2 | nxp:NX_P19367-1 | nxp:NX_P19367-3
GKFNTSDVSAIEK	33	4	| nxp:NX_P19367-4 | nxp:NX_P19367-2 | nxp:NX_P19367-1 | nxp:NX_P19367-3
VIEGDVVSALNK	33	4	| nxp:NX_P48059-4 | nxp:NX_P48059-2 | nxp:NX_P48059-5 | nxp:NX_P48059-3
APSVPAAEPEYPK	33	4	| nxp:NX_P54819-3 | nxp:NX_P54819-5 | nxp:NX_P54819-2 | nxp:NX_P54819-1
GIYAYGFEKPSAIQQR	33	4	| nxp:NX_P60842-1 | nxp:NX_Q14240-1 | nxp:NX_Q14240-2 | nxp:NX_P60842-2
NAVITVPAYFNDSQR	33	3	| nxp:NX_P08107-1 | nxp:NX_P34931-1 | nxp:NX_P38646-1
VLQQFADNDVSR	33	3	| nxp:NX_P51659-1 | nxp:NX_P51659-3 | nxp:NX_P51659-2
FATGDIIQIINK	33	3	| nxp:NX_Q00013-2 | nxp:NX_Q00013-3 | nxp:NX_Q00013-1
TISQEFLTPGK	33	3	| nxp:NX_Q0ZGT2-4 | nxp:NX_Q0ZGT2-1 | nxp:NX_Q0ZGT2-3
IGGIGTVPVGR	33	3	| nxp:NX_Q5VTE0-1 | nxp:NX_P68104-1 | nxp:NX_Q05639-1
VAIYSPDGVR	33	3	| nxp:NX_Q8NE86-3 | nxp:NX_Q8NE86-1 | nxp:NX_Q8NE86-2
IPGTGALASAAAAVSGSK	33	2	| nxp:NX_O75298-2 | nxp:NX_O75298-1
EIISHDTR	33	2	| nxp:NX_P00387-1 | nxp:NX_P00387-3
LKGTEDEVEK	33	2	| nxp:NX_P07951-2 | nxp:NX_P07951-1
TLLSNLEEAK	33	2	| nxp:NX_P10909-5 | nxp:NX_P10909-2
LEDFFAR	33	2	| nxp:NX_P11413-3 | nxp:NX_P11413-2
ENGVYLIDVK	33	2	| nxp:NX_P21333-2 | nxp:NX_P21333-1
RAPSVANVGSHCDLSLK	33	2	| nxp:NX_P21333-2 | nxp:NX_P21333-1
AEGPGLSR	33	2	| nxp:NX_P21333-2 | nxp:NX_P21333-1
MDCQECPEGYR	33	2	| nxp:NX_P21333-2 | nxp:NX_P21333-1
ADTHIPGSPFK	33	2	| nxp:NX_P21333-2 | nxp:NX_P21333-1
AEISFEDR	33	2	| nxp:NX_P21333-2 | nxp:NX_P21333-1
AGTYSLNVTYGGHQVPGSPFK	33	2	| nxp:NX_P21333-2 | nxp:NX_P21333-1
ILFADTHIPGSPFK	33	2	| nxp:NX_P21333-2 | nxp:NX_P21333-1
SLNVTYGGHQVPGSPFK	33	2	| nxp:NX_P21333-2 | nxp:NX_P21333-1
IALYETPTGWK	33	2	| nxp:NX_P36871-1 | nxp:NX_P36871-2
FVEGLPINDFSR	33	2	| nxp:NX_P40925-1 | nxp:NX_P40925-3
TAVETAVLLLR	33	2	| nxp:NX_P49368-2 | nxp:NX_P49368-1
VPFLEFK	33	2	| nxp:NX_P50226-1 | nxp:NX_P50225-1
LTPITYPQGLAM(15.9949)AK	33	2	| nxp:NX_P63000-1 | nxp:NX_P63000-2
GYSFTTTAEREIVRDIKEK	33	2	| nxp:NX_P63261-1 | nxp:NX_P60709-1
AIVAGDQNVEYK	33	2	| nxp:NX_Q13642-5 | nxp:NX_Q13642-4
GEFKDEEETVTTK	33	2	| nxp:NX_Q14677-1 | nxp:NX_Q14677-3
VGAVDADKHHSLGGQYGVQGFPTIK	33	2	| nxp:NX_Q15084-1 | nxp:NX_Q15084-2
LAAVTYNGVDNNK	33	2	| nxp:NX_Q16181-2 | nxp:NX_Q16181-1
VLAGGVAPALFR	33	2	| nxp:NX_Q86UX7-2 | nxp:NX_Q86UX7-1
LLVPLVPDLQDVAQLR	33	2	| nxp:NX_Q9BSJ8-1 | nxp:NX_Q9BSJ8-2
AANVLLSEHGEVK	33	2	| nxp:NX_Q9Y6E0-2 | nxp:NX_Q9Y6E0-1
YLSNAYAR	33	1	| nxp:NX_O00299-1
DHALLEEQSK	33	1	| nxp:NX_O43707-1
IYESIEEAK	33	1	| nxp:NX_O75116-1
FATLYSTR	33	1	| nxp:NX_O94919-1
YEGSYALTSEEAER	33	1	| nxp:NX_O95810-1
QPVSGAVEGK	33	1	| nxp:NX_O95810-1
ETFDVTLEPLSFKK	33	1	| nxp:NX_P00488-1
ITLPVDFVTADK	33	1	| nxp:NX_P00558-1
IIFVVGGPGSGK	33	1	| nxp:NX_P00568-1
NVVNEYSSELEK	33	1	| nxp:NX_P02675-1
QNCELFEQLGEYK	33	1	| nxp:NX_P02768-1
VHTECCHGDLLECADDRADLAK	33	1	| nxp:NX_P02768-1
CPLLKPW	33	1	| nxp:NX_P04075-2
ALANSLACQGK	33	1	| nxp:NX_P04075-2
VIVIPVGIGPHANLK	33	1	| nxp:NX_P04275-1
YAGSQVASTSEVLK	33	1	| nxp:NX_P04275-1
SVGSQWASPENPCLINECVR	33	1	| nxp:NX_P04275-1
APTCGLCEVAR	33	1	| nxp:NX_P04275-1
FQYYEDSSGK	33	1	| nxp:NX_P05106-1
GLTSVINQK	33	1	| nxp:NX_P07195-1
SADTLWDIQK	33	1	| nxp:NX_P07195-1
LEICNLTPDALK	33	1	| nxp:NX_P07384-1
YLGQDYEQLR	33	1	| nxp:NX_P07384-1
NQVALNPQNTVFDAK	33	1	| nxp:NX_P08107-1
TVIIEQSWGSPK	33	1	| nxp:NX_P10809-1
LEGPNNVECTTSGR	33	1	| nxp:NX_P16109-1
LNDFASTVR	33	1	| nxp:NX_P20674-1
TVYFAEEVQCEGNSFHK	33	1	| nxp:NX_P21291-1
NIIHGSDSVK	33	1	| nxp:NX_P22392-2
KESPLLFK	33	1	| nxp:NX_P26038-1
FYGDEEKDK	33	1	| nxp:NX_P27797-1
IGPILDNSTLQSEVKPILEK	33	1	| nxp:NX_P30153-1
AAPEASGTPSSDAVSR	33	1	| nxp:NX_P31146-1
LAYINPDLALEEK	33	1	| nxp:NX_P31948-1
VSHLLGINVTDF	33	1	| nxp:NX_P35579-1
FTTNLTEEEEK	33	1	| nxp:NX_P35579-1
THEAQIQEM(15.9949)R	33	1	| nxp:NX_P35579-1
PLNDNIATLLHQSSDK	33	1	| nxp:NX_P35579-1
QGFPNRVVFQEFR	33	1	| nxp:NX_P35579-1
AEAGDNLGALVR	33	1	| nxp:NX_P49411-1
VSAFENPYVDAIK	33	1	| nxp:NX_P50148-1
GVDLQENNPASR	33	1	| nxp:NX_P51148-2
CIYNLLQSSSPAVK	33	1	| nxp:NX_P53618-1
TPFLLSGTSYK	33	1	| nxp:NX_P55084-1
IAVAAQNCYK	33	1	| nxp:NX_P60174-3
PALHIEDLPEK	33	1	| nxp:NX_P61952-1
YLAEVATGEK	33	1	| nxp:NX_P61981-1
ELAGHTGYLSCCR	33	1	| nxp:NX_P62873-1
TFVSGACDASIK	33	1	| nxp:NX_P62879-1
TEWLDGKHVVFGK	33	1	| nxp:NX_P62937-1
HEVININLK	33	1	| nxp:NX_P78417-1
TGQAPGYSYTAANK	33	1	| nxp:NX_P99999-1
AINPINTFTK	33	1	| nxp:NX_Q07960-1
TVSSLSEDLESTR	33	1	| nxp:NX_Q13201-1
TLVGSENPPLTVIR	33	1	| nxp:NX_Q13576-1
VLANPGNSQVAR	33	1	| nxp:NX_Q14974-1
AITIAGVPQSVTECVK	33	1	| nxp:NX_Q15365-1
EGGPEAPIPPPPQPR	33	1	| nxp:NX_Q15942-1
AYHPHCFTCVVCAR	33	1	| nxp:NX_Q15942-1
VVVVTGANTGIGK	33	1	| nxp:NX_Q8TC12-1
QLPEPLISFR	33	1	| nxp:NX_Q92619-1
IVQAEGEAEAAK	33	1	| nxp:NX_Q99623-1
EAEEHQETQCLR	33	1	| nxp:NX_Q99969-1
ADAEGESDLENSRK	33	1	| nxp:NX_Q9Y490-1
VAEQIPLLVQGVR	33	1	| nxp:NX_Q9Y490-1
FSSIPAQISPEGR	33	1	| nxp:NX_Q9Y490-1
LREAAEGLR	33	1	| nxp:NX_Q9Y490-1
QAAASATQTIAAAQHAA	33	1	| nxp:NX_Q9Y490-1
ISIGNVVK	33	1	| nxp:NX_Q9Y490-1
LLASVEER	33	1	| nxp:NX_Q9Y6C2-1
GTELGGAAGQGGHPPGYTSLASR	33	1	| nxp:NX_Q9Y6C2-1
RPPQECCSPELGR	33	1	| nxp:NX_Q9Y6C2-1
STM(15.9949)QELNSR	33	1	nxp:NX_P35527-1
NELESYAYSLK	33	1	nxp:NX_P11021-1
INISEGNCPER	32	12	| nxp:NX_Q15366-4 | nxp:NX_Q15366-5 | nxp:NX_Q15365-1 | nxp:NX_Q15366-6 | nxp:NX_Q15366-3 | nxp:NX_Q15366-1 | nxp:NX_Q15366-2 | nxp:NX_P57721-2 | nxp:NX_P57721-3 | nxp:NX_P57721-5 | nxp:NX_P57721-4 | nxp:NX_P57721-1
VEAPFIPK	32	11	| nxp:NX_P17612-2 | nxp:NX_P17612-1 | nxp:NX_P22694-2 | nxp:NX_P22694-10 | nxp:NX_P22694-4 | nxp:NX_P22694-3 | nxp:NX_P22694-1 | nxp:NX_P22694-5 | nxp:NX_P22694-7 | nxp:NX_P22694-6 | nxp:NX_P22694-9
LKGTEDELDK	32	7	| nxp:NX_P09493-4 | nxp:NX_P09493-3 | nxp:NX_P09493-10 | nxp:NX_P67936-2 | nxp:NX_P06753-1 | nxp:NX_P09493-1 | nxp:NX_P09493-9
GAPESVIER	32	7	| nxp:NX_Q93084-4 | nxp:NX_Q93084-2 | nxp:NX_Q93084-3 | nxp:NX_Q93084-7 | nxp:NX_Q93084-1 | nxp:NX_Q93084-6 | nxp:NX_Q93084-5
KLVIIESDLER	32	6	| nxp:NX_P09493-2 | nxp:NX_P09493-4 | nxp:NX_P09493-3 | nxp:NX_P09493-10 | nxp:NX_P09493-8 | nxp:NX_P09493-5
HIAEEADR	32	6	| nxp:NX_P67936-1 | nxp:NX_P06753-5 | nxp:NX_P06753-2 | nxp:NX_P67936-2 | nxp:NX_P06753-1 | nxp:NX_P06753-3
LTCLNEASVLHNLK	32	5	| nxp:NX_P35579-1 | nxp:NX_P35580-1 | nxp:NX_P35580-2 | nxp:NX_P35580-3 | nxp:NX_P35580-4
ALLEVVQSGGK	32	4	| nxp:NX_O14818-1 | nxp:NX_Q8TAA3-2 | nxp:NX_Q8TAA3-5 | nxp:NX_Q8TAA3-1
TIPWLENR	32	4	| nxp:NX_P12814-3 | nxp:NX_P35609-1 | nxp:NX_P12814-1 | nxp:NX_P12814-2
TTVGVDGSLYK	32	4	| nxp:NX_P19367-4 | nxp:NX_P19367-2 | nxp:NX_P19367-1 | nxp:NX_P19367-3
AYGPYSVTNCGEHDTTEYK	32	4	| nxp:NX_P29350-1 | nxp:NX_P29350-3 | nxp:NX_P29350-2 | nxp:NX_P29350-4
AWCVNCFACSTCNTK	32	4	| nxp:NX_P48059-4 | nxp:NX_P48059-2 | nxp:NX_P48059-5 | nxp:NX_P48059-3
SDEGHPFR	32	4	| nxp:NX_Q9NQC3-3 | nxp:NX_Q9NQC3-2 | nxp:NX_Q9NQC3-5 | nxp:NX_Q9NQC3-1
EPQVYTLPPSR	32	3	| nxp:NX_P01859-1 | nxp:NX_P01857-1 | nxp:NX_P01860-1 |
VDSVLDVVRK	32	3	| nxp:NX_P07437-1 | nxp:NX_P68371-1 | nxp:NX_Q13509-1
AFEGQAHGADR	32	3	| nxp:NX_P11169-1 | nxp:NX_Q8TDB8-2 | nxp:NX_Q8TDB8-1
SITAQSTFNDLQDLR	32	3	| nxp:NX_P61224-3 | nxp:NX_P61224-1 | nxp:NX_P62834-1
HLTYENVER	32	3	| nxp:NX_P62491-2 | nxp:NX_P62491-1 | nxp:NX_Q15907-1
DFAAVEEVAPAKPPR	32	3	| nxp:NX_Q5JSH3-4 | nxp:NX_Q5JSH3-2 | nxp:NX_Q5JSH3-1
LIIWDSYTTNK	32	3	| nxp:NX_Q9HAV0-1 | nxp:NX_P62879-1 | nxp:NX_P62873-1
TLNQLGTPQDSPELR	32	2	| nxp:NX_O15400-2 | nxp:NX_O15400-1
GHTESCSCPLQQSPR	32	2	| nxp:NX_O76074-2 | nxp:NX_O76074-1
GPSGLLVYQGK	32	2	| nxp:NX_P00387-1 | nxp:NX_P00387-3
PALPAGTEDTAK	32	2	| nxp:NX_P06396-3 | nxp:NX_P06396-1
SDRPELTGAK	32	2	| nxp:NX_P13804-2 | nxp:NX_P13804-1
FGGAAVFPNQEQAR	32	2	| nxp:NX_P19971-1 | nxp:NX_P19971-2
AHEPTYFTVDCAE	32	2	| nxp:NX_P21333-2 | nxp:NX_P21333-1
YGGDEIPFSPYR	32	2	| nxp:NX_P21333-2 | nxp:NX_P21333-1
ETGEHLVHVK	32	2	| nxp:NX_P21333-2 | nxp:NX_P21333-1
QVPVTEGCDPSR	32	2	| nxp:NX_P21333-2 | nxp:NX_P21333-1
AFCAENLEEK	32	2	| nxp:NX_P49407-2 | nxp:NX_P49407-1
EIRPALELLEPIEQK	32	2	| nxp:NX_P50395-2 | nxp:NX_P50395-1
[truncated: 16,006 more rows]

## Sheet: (C) All_PROTEINS
Supplemental Table 1c: List of all proteins confidently identified in the platelet proteome.
Entry	Length	Unique peptides	MolWt	Peptide sequence count	Spectral count	Coverage	Description
nxp:NX_P21333-1	2647	0	280545.9	451	11473	0.7726	Filamin-A isoform Iso 1 \Gname=FLNA \NcbiTaxId=9606
nxp:NX_P21333-2	2639	0	279825.5	451	11473	0.7749	Filamin-A isoform Iso 2 \Gname=FLNA \NcbiTaxId=9606
nxp:NX_Q9Y490-1	2541	448	269581	448	12912	0.7355	Talin-1 isoform Iso 1 \Gname=TLN1 \NcbiTaxId=9606
nxp:NX_P35579-1	1960	340	226373.6	341	6703	0.6745	Myosin-9 isoform Iso 1 \Gname=MYH9 \NcbiTaxId=9606
nxp:NX_P07996-1	1170	162	129281.5	162	3769	0.6419	Thrombospondin-1 isoform Iso 1 \Gname=THBS1 \NcbiTaxId=9606
nxp:NX_P12814-1	892	50	102974.6	161	3843	0.741	Alpha-actinin-1 isoform Iso 1 \Gname=ACTN1 \NcbiTaxId=9606
nxp:NX_P63261-1	375	89	41747.8	161	5938	0.92	Actin. cytoplasmic 2 isoform Iso 1 \Gname=ACTG1 \NcbiTaxId=9606
nxp:NX_P18206-1	1134	0	123703.8	160	3535	0.7125	Vinculin isoform Iso 2 \Gname=VCL \NcbiTaxId=9606
nxp:NX_P18206-2	1066	0	116631.3	160	3535	0.758	Vinculin isoform Iso 1 \Gname=VCL \NcbiTaxId=9606
nxp:NX_P12814-3	914	0	105483.7	151	3609	0.698	Alpha-actinin-1 isoform Iso 3 \Gname=ACTN1 \NcbiTaxId=9606
nxp:NX_P08514-1	1039	138	113287.5	138	3501	0.539	Integrin alpha-IIb isoform Iso 1 \Gname=ITGA2B \NcbiTaxId=9606
nxp:NX_P02671-1	866	1	94896.4	122	2375	0.5693	Fibrinogen alpha chain isoform Iso 1 \Gname=FGA \NcbiTaxId=9606
nxp:NX_P02671-2	644	0	69695.8	122	2374	0.7655	Fibrinogen alpha chain isoform Iso 2 \Gname=FGA \NcbiTaxId=9606
nxp:NX_Q15149-1	4684	0	531448	122	797	0.2871	Plectin isoform Iso 1 \Gname=PLEC \NcbiTaxId=9606
nxp:NX_Q15149-2	4574	0	518138.6	122	797	0.2941	Plectin isoform Iso 2 \Gname=PLEC \NcbiTaxId=9606
nxp:NX_Q15149-4	4547	0	515865.7	122	797	0.2958	Plectin isoform Iso 4 \Gname=PLEC \NcbiTaxId=9606
nxp:NX_Q15149-5	4547	0	515943.7	122	797	0.2958	Plectin isoform Iso 5 \Gname=PLEC \NcbiTaxId=9606
nxp:NX_Q15149-6	4551	0	516145.6	122	797	0.2955	Plectin isoform Iso 6 \Gname=PLEC \NcbiTaxId=9606
nxp:NX_Q15149-7	4515	0	512273.8	122	797	0.2979	Plectin isoform Iso 7 \Gname=PLEC \NcbiTaxId=9606
nxp:NX_Q15149-8	4525	0	513375.3	122	797	0.2972	Plectin isoform Iso 8 \Gname=PLEC \NcbiTaxId=9606
nxp:NX_Q15149-9	4533	0	514442.8	122	797	0.2967	Plectin isoform Iso 9 \Gname=PLEC \NcbiTaxId=9606
nxp:NX_Q9H4B7-1	451	87	50276.5	115	2536	0.8936	Tubulin beta-1 chain isoform Iso 1 \Gname=TUBB1 \NcbiTaxId=9606
nxp:NX_P02768-1	609	108	69303.5	111	2381	0.803	Serum albumin isoform Iso 1 \Gname=ALB \NcbiTaxId=9606
nxp:NX_P02679-1	453	26	51460.9	106	2401	0.7196	Fibrinogen gamma chain isoform Gamma-B \Gname=FGG \NcbiTaxId=9606
nxp:NX_P02679-2	437	1	49447	105	2351	0.7208	Fibrinogen gamma chain isoform Gamma-A \Gname=FGG \NcbiTaxId=9606
nxp:NX_P02675-1	491	104	55874.3	104	1992	0.7108	Fibrinogen beta chain isoform Iso 1 \Gname=FGB \NcbiTaxId=9606
nxp:NX_Q15149-3	4570	0	517698.4	101	534	0.244	Plectin isoform Iso 3 \Gname=PLEC \NcbiTaxId=9606
nxp:NX_Q86UX7-1	667	0	75887	101	2447	0.6987	Fermitin family homolog 3 isoform Iso 1 \Gname=FERMT3 \NcbiTaxId=9606
nxp:NX_Q86UX7-2	663	0	75364.7	101	2447	0.7029	Fermitin family homolog 3 isoform Iso 2 \Gname=FERMT3 \NcbiTaxId=9606
nxp:NX_O43707-1	911	40	104770.5	100	2365	0.6345	Alpha-actinin-4 isoform Iso 1 \Gname=ACTN4 \NcbiTaxId=9606
nxp:NX_P68366-1	448	13	49874.4	95	1947	0.808	Tubulin alpha-4A chain isoform Iso 1 \Gname=TUBA4A \NcbiTaxId=9606
nxp:NX_P68363-1	451	0	50101.6	94	1929	0.8115	Tubulin alpha-1B chain isoform Iso 1 \Gname=TUBA1B \NcbiTaxId=9606
nxp:NX_P04275-1	2813	91	309039.9	91	1384	0.3622	von Willebrand factor isoform Iso 1 \Gname=VWF \NcbiTaxId=9606
nxp:NX_Q71U36-1	451	0	50085.6	91	1809	0.7805	Tubulin alpha-1A chain isoform Iso 2 \Gname=TUBA1A \NcbiTaxId=9606
nxp:NX_Q00610-1	1675	0	191474.5	90	1494	0.4561	Clathrin heavy chain 1 isoform Iso 1 \Gname=CLTC \NcbiTaxId=9606
nxp:NX_Q00610-2	1639	0	187752.8	90	1494	0.4661	Clathrin heavy chain 1 isoform Iso 2 \Gname=CLTC \NcbiTaxId=9606
nxp:NX_Q14766-1	1721	67	186654.5	90	1460	0.4073	Latent-transforming growth factor beta-binding protein 1 isoform Long \Gname=LTBP1 \NcbiTaxId=9606
nxp:NX_P06396-1	782	0	85626.2	89	1917	0.624	Gelsolin isoform Iso 1 \Gname=GSN \NcbiTaxId=9606
nxp:NX_P06396-3	742	0	81872	89	1917	0.6577	Gelsolin isoform Iso 2 \Gname=GSN \NcbiTaxId=9606
nxp:NX_P07437-1	444	24	49621	87	1765	0.714	Tubulin beta chain isoform Iso 1 \Gname=TUBB \NcbiTaxId=9606
nxp:NX_P68032-1	377	5	41973.9	87	2054	0.6074	Actin. alpha cardiac muscle 1 isoform Iso 1 \Gname=ACTC1 \NcbiTaxId=9606
nxp:NX_Q9BQE3-1	449	3	49845.5	86	1461	0.7706	Tubulin alpha-1C chain isoform Iso 1 \Gname=TUBA1C \NcbiTaxId=9606
nxp:NX_P05106-1	788	85	86982.4	85	2237	0.5482	Integrin beta-3 isoform Beta-3A \Gname=ITGB3 \NcbiTaxId=9606
nxp:NX_P60709-1	375	0	41691.7	85	559	0.728	Actin. cytoplasmic 1 isoform Iso 1 \Gname=ACTB \NcbiTaxId=9606
nxp:NX_P67936-1	248	20	28486.5	84	989	0.8427	Tropomyosin alpha-4 chain isoform Iso 1 \Gname=TPM4 \NcbiTaxId=9606
nxp:NX_P00488-1	732	83	83196.6	83	2014	0.5861	Coagulation factor XIII A chain isoform Iso 1 \Gname=F13A1 \NcbiTaxId=9606
nxp:NX_P68133-1	377	0	42005.8	81	1424	0.5491	Actin. alpha skeletal muscle isoform Iso 1 \Gname=ACTA1 \NcbiTaxId=9606
nxp:NX_P68371-1	445	9	49781	81	1380	0.6787	Tubulin beta-4B chain isoform Iso 1 \Gname=TUBB4B \NcbiTaxId=9606
nxp:NX_Q15942-1	572	81	61220.2	81	1739	0.6906	Zyxin isoform Iso 1 \Gname=ZYX \NcbiTaxId=9606
nxp:NX_P67936-2	284	10	32684.6	80	687	0.75	Tropomyosin alpha-4 chain isoform Iso 2 \Gname=TPM4 \NcbiTaxId=9606
nxp:NX_O00151-1	329	77	36031	77	1301	0.8024	PDZ and LIM domain protein 1 isoform Iso 1 \Gname=PDLIM1 \NcbiTaxId=9606
nxp:NX_P12814-2	887	0	102626.4	77	197	0.5896	Alpha-actinin-1 isoform Iso 2 \Gname=ACTN1 \NcbiTaxId=9606
nxp:NX_Q14766-3	1342	1	147118.1	77	588	0.4583	Latent-transforming growth factor beta-binding protein 1 isoform Iso 3 \Gname=LTBP1 \NcbiTaxId=9606
nxp:NX_Q13201-1	1228	76	138005.4	76	1438	0.4039	Multimerin-1 isoform Iso 1 \Gname=MMRN1 \NcbiTaxId=9606
nxp:NX_Q14766-4	1722	0	186725.6	76	585	0.3757	Latent-transforming growth factor beta-binding protein 1 isoform Iso 4 \Gname=LTBP1 \NcbiTaxId=9606
nxp:NX_P14618-1	531	62	57882	74	1397	0.6685	Pyruvate kinase PKM isoform M2 \Gname=PKM \NcbiTaxId=9606
nxp:NX_P08567-1	350	70	40081.4	70	1050	0.6571	Pleckstrin isoform Iso 1 \Gname=PLEK \NcbiTaxId=9606
nxp:NX_Q6S8J3-1	1075	1	121267.7	67	1084	0.1637	POTE ankyrin domain family member E isoform Iso 1 \Gname=POTEE \NcbiTaxId=9606
nxp:NX_Q13418-1	452	66	51367.9	66	1119	0.7035	Integrin-linked protein kinase isoform Iso 1 \Gname=ILK \NcbiTaxId=9606
nxp:NX_Q9NY65-1	449	15	50043.5	66	1203	0.6949	Tubulin alpha-8 chain isoform Iso 2 \Gname=TUBA8 \NcbiTaxId=9606
nxp:NX_P04075-2	418	65	45214.1	65	1322	0.7536	Fructose-bisphosphate aldolase A isoform Iso 1 \Gname=ALDOA \NcbiTaxId=9606
nxp:NX_P04406-1	335	65	36012.4	65	1264	0.8119	Glyceraldehyde-3-phosphate dehydrogenase isoform Iso 2 \Gname=GAPDH \NcbiTaxId=9606
nxp:NX_Q13576-1	1575	65	180447.5	65	876	0.4152	Ras GTPase-activating-like protein IQGAP2 isoform Iso 1 \Gname=IQGAP2 \NcbiTaxId=9606
nxp:NX_P12259-1	2224	64	251527.5	64	1022	0.2536	Coagulation factor V isoform Iso 1 \Gname=F5 \NcbiTaxId=9606
nxp:NX_P06753-2	248	14	28996.7	63	726	0.7258	Tropomyosin alpha-3 chain isoform Iso 2 \Gname=TPM3 \NcbiTaxId=9606
nxp:NX_P11021-1	654	0	72270.4	58	1145	0.5596	78 kDa glucose-regulated protein isoform Iso 1 \Gname=HSPA5 \NcbiTaxId=9606
nxp:NX_Q562R1-1	376	6	41958	58	1485	0.5239	Beta-actin-like protein 2 isoform Iso 1 \Gname=ACTBL2 \NcbiTaxId=9606
nxp:NX_A5A3E0-1	1075	0	121348.7	57	902	0.147	POTE ankyrin domain family member F isoform Iso 1 \Gname=POTEF \NcbiTaxId=9606
nxp:NX_P30101-1	505	56	56728.7	56	892	0.6535	Protein disulfide-isomerase A3 isoform Iso 1 \Gname=PDIA3 \NcbiTaxId=9606
nxp:NX_P14618-2	531	2	58006.9	55	681	0.6139	Pyruvate kinase PKM isoform M1 \Gname=PKM \NcbiTaxId=9606
nxp:NX_P68871-1	147	45	15970.3	55	1323	0.9388	Hemoglobin subunit beta isoform Iso 1 \Gname=HBB \NcbiTaxId=9606
nxp:NX_O75083-1	606	54	66133.9	54	1345	0.6601	WD repeat-containing protein 1 isoform Iso 1 \Gname=WDR1 \NcbiTaxId=9606
nxp:NX_Q01082-1	2364	49	274420.7	54	431	0.2669	Spectrin beta chain. non-erythrocytic 1 isoform Long \Gname=SPTBN1 \NcbiTaxId=9606
nxp:NX_P11142-1	646	40	70836.2	53	1011	0.5433	Heat shock cognate 71 kDa protein isoform Iso 1 \Gname=HSPA8 \NcbiTaxId=9606
nxp:NX_Q01518-1	475	19	51850.7	52	1003	0.6463	Adenylyl cyclase-associated protein 1 isoform Iso 1 \Gname=CAP1 \NcbiTaxId=9606
nxp:NX_P06733-1	434	42	47121.3	51	695	0.6751	Alpha-enolase isoform MBP-1 \Gname=ENO1 \NcbiTaxId=9606
nxp:NX_P06753-1	285	1	32911.8	51	471	0.5263	Tropomyosin alpha-3 chain isoform Iso 1 \Gname=TPM3 \NcbiTaxId=9606
nxp:NX_P07900-2	854	29	98081.5	51	826	0.3876	Heat shock protein HSP 90-alpha isoform Iso 1 \Gname=HSP90AA1 \NcbiTaxId=9606
nxp:NX_P23528-1	166	49	18472.6	51	835	0.8795	Cofilin-1 isoform Iso 1 \Gname=CFL1 \NcbiTaxId=9606
nxp:NX_P62736-1	377	0	41963.8	51	312	0.4589	Actin. aortic smooth muscle isoform Iso 1 \Gname=ACTA2 \NcbiTaxId=9606
nxp:NX_P63267-1	376	0	41831.8	51	312	0.4601	Actin. gamma-enteric smooth muscle isoform Iso 1 \Gname=ACTG2 \NcbiTaxId=9606
nxp:NX_Q01518-2	474	1	51779.6	51	940	0.635	Adenylyl cyclase-associated protein 1 isoform Iso 2 \Gname=CAP1 \NcbiTaxId=9606
nxp:NX_Q05682-4	538	0	62607.9	51	841	0.5539	Caldesmon isoform Iso 4 \Gname=CALD1 \NcbiTaxId=9606
nxp:NX_Q05682-5	532	0	61158.1	51	841	0.5602	Caldesmon isoform Iso 5 \Gname=CALD1 \NcbiTaxId=9606
nxp:NX_P06753-5	248	0	28834.7	50	398	0.629	Tropomyosin alpha-3 chain isoform Iso 5 \Gname=TPM3 \NcbiTaxId=9606
nxp:NX_P48059-2	337	0	38377.4	50	783	0.7359	LIM and senescent cell antigen-like-containing domain protein 1 isoform Iso 2 \Gname=LIMS1 \NcbiTaxId=9606
nxp:NX_P48059-3	387	0	44342.4	50	783	0.6408	LIM and senescent cell antigen-like-containing domain protein 1 isoform Iso 3 \Gname=LIMS1 \NcbiTaxId=9606
nxp:NX_P48059-4	329	0	37657	50	783	0.7538	LIM and senescent cell antigen-like-containing domain protein 1 isoform Iso 1 \Gname=LIMS1 \NcbiTaxId=9606
nxp:NX_P48059-5	362	0	41525.1	50	783	0.6851	LIM and senescent cell antigen-like-containing domain protein 1 isoform Iso 5 \Gname=LIMS1 \NcbiTaxId=9606
nxp:NX_P09493-10	284	0	32827.7	49	438	0.5704	Tropomyosin alpha-1 chain isoform Iso 10 \Gname=TPM1 \NcbiTaxId=9606
nxp:NX_P09493-3	284	0	32837.7	49	438	0.5704	Tropomyosin alpha-1 chain isoform Iso 3 \Gname=TPM1 \NcbiTaxId=9606
nxp:NX_P09493-4	284	0	32809.8	49	438	0.5704	Tropomyosin alpha-1 chain isoform Iso 4 \Gname=TPM1 \NcbiTaxId=9606
nxp:NX_P07737-1	140	48	15026.5	48	1488	0.8714	Profilin-1 isoform Iso 1 \Gname=PFN1 \NcbiTaxId=9606
nxp:NX_Q05682-1	793	1	93157.4	48	576	0.3594	Caldesmon isoform Iso 1 \Gname=CALD1 \NcbiTaxId=9606
nxp:NX_Q05682-2	564	0	65649.5	48	575	0.5053	Caldesmon isoform Iso 2 \Gname=CALD1 \NcbiTaxId=9606
nxp:NX_Q05682-3	558	0	64199.8	48	575	0.5108	Caldesmon isoform Iso 3 \Gname=CALD1 \NcbiTaxId=9606
nxp:NX_Q05682-6	563	0	65562.4	48	575	0.5062	Caldesmon isoform Iso 6 \Gname=CALD1 \NcbiTaxId=9606
nxp:NX_Q9BUF5-1	446	2	49807	48	1011	0.352	Tubulin beta-6 chain isoform Iso 1 \Gname=TUBB6 \NcbiTaxId=9606
nxp:NX_P26038-1	577	44	67759.8	47	968	0.513	Moesin isoform Iso 1 \Gname=MSN \NcbiTaxId=9606
nxp:NX_P35580-1	1976	0	228839.9	47	243	0.1144	Myosin-10 isoform Iso 1 \Gname=MYH10 \NcbiTaxId=9606
nxp:NX_P35580-2	1992	0	230618.9	47	243	0.1135	Myosin-10 isoform Iso 2 \Gname=MYH10 \NcbiTaxId=9606
nxp:NX_P35580-3	1997	0	231208.1	47	243	0.1132	Myosin-10 isoform Iso 3 \Gname=MYH10 \NcbiTaxId=9606
nxp:NX_P35580-4	2007	0	232366.7	47	243	0.1126	Myosin-10 isoform Iso 4 \Gname=MYH10 \NcbiTaxId=9606
nxp:NX_Q13509-1	450	0	50382.2	47	1194	0.3444	Tubulin beta-3 chain isoform Iso 1 \Gname=TUBB3 \NcbiTaxId=9606
nxp:NX_Q13748-1	450	0	49909.6	47	160	0.5244	Tubulin alpha-3C/D chain isoform Iso 1 \Gname=TUBA3C;TUBA3D \NcbiTaxId=9606
nxp:NX_Q9NZN3-1	535	27	60830.7	47	520	0.5178	EH domain-containing protein 3 isoform Iso 1 \Gname=EHD3 \NcbiTaxId=9606
nxp:NX_P11277-2	2328	27	267642.6	45	338	0.2156	Spectrin beta chain. erythrocytic isoform Iso 2 \Gname=SPTB \NcbiTaxId=9606
nxp:NX_P23229-2	1073	0	119383.6	45	640	0.4007	Integrin alpha-6 isoform Alpha-6X1A \Gname=ITGA6 \NcbiTaxId=9606
nxp:NX_P23229-4	1068	0	118995.5	45	640	0.4026	Integrin alpha-6 isoform Iso 7 \Gname=ITGA6 \NcbiTaxId=9606
nxp:NX_P23229-6	1112	0	123932.8	45	640	0.3867	Integrin alpha-6 isoform Alpha-6X1X2A \Gname=ITGA6 \NcbiTaxId=9606
nxp:NX_P23229-9	1097	0	122263	45	640	0.392	Integrin alpha-6 isoform Iso 9 \Gname=ITGA6 \NcbiTaxId=9606
nxp:NX_Q9ULV4-1	474	44	53197.1	45	903	0.5169	Coronin-1C isoform Iso 1 \Gname=CORO1C \NcbiTaxId=9606
nxp:NX_O75116-1	1388	43	160780.8	44	514	0.3048	Rho-associated protein kinase 2 isoform Iso 1 \Gname=ROCK2 \NcbiTaxId=9606
nxp:NX_P00558-1	417	44	44568.1	44	867	0.6403	Phosphoglycerate kinase 1 isoform Iso 1 \Gname=PGK1 \NcbiTaxId=9606
nxp:NX_O00429-1	736	0	81808.1	43	602	0.4402	Dynamin-1-like protein isoform Iso 1 \Gname=DNM1L \NcbiTaxId=9606
nxp:NX_O00429-6	749	0	83328.9	43	602	0.4326	Dynamin-1-like protein isoform Iso 6 \Gname=DNM1L \NcbiTaxId=9606
nxp:NX_P07237-1	508	43	57062.7	43	753	0.5807	Protein disulfide-isomerase isoform Iso 1 \Gname=P4HB \NcbiTaxId=9606
nxp:NX_P09493-8	284	6	32778.7	43	405	0.5599	Tropomyosin alpha-1 chain isoform Iso 8 \Gname=TPM1 \NcbiTaxId=9606
nxp:NX_P14625-1	803	40	92393.3	43	694	0.3711	Endoplasmin isoform Iso 1 \Gname=HSP90B1 \NcbiTaxId=9606
nxp:NX_P50851-2	2851	41	317483.3	43	531	0.1782	Lipopolysaccharide-responsive and beige-like anchor protein isoform Iso 2 \Gname=LRBA \NcbiTaxId=9606
nxp:NX_Q15833-1	593	17	66392.5	43	615	0.5194	Syntaxin-binding protein 2 isoform Iso 1 \Gname=STXBP2 \NcbiTaxId=9606
nxp:NX_P04264-1	644	39	65981	42	634	0.5652	Keratin. type II cytoskeletal 1 isoform Iso 1 \Gname=KRT1 \NcbiTaxId=9606
nxp:NX_P37802-1	199	42	22359.2	42	783	0.8392	Transgelin-2 isoform Iso 1 \Gname=TAGLN2 \NcbiTaxId=9606
nxp:NX_P63104-1	245	21	27709.7	42	1077	0.649	14-3-3 protein zeta/delta isoform Iso 1 \Gname=YWHAZ \NcbiTaxId=9606
nxp:NX_Q15833-2	590	0	66078.3	42	594	0.5102	Syntaxin-binding protein 2 isoform Iso 2 \Gname=STXBP2 \NcbiTaxId=9606
nxp:NX_Q9H4M9-1	534	22	60570.7	42	388	0.4588	EH domain-containing protein 1 isoform Iso 1 \Gname=EHD1 \NcbiTaxId=9606
nxp:NX_O00429-3	710	24	79373.9	41	529	0.4282	Dynamin-1-like protein isoform Iso 2 \Gname=DNM1L \NcbiTaxId=9606
nxp:NX_P40197-1	560	41	60902.7	41	602	0.4821	Platelet glycoprotein V isoform Iso 1 \Gname=GP5 \NcbiTaxId=9606
nxp:NX_Q93084-1	1043	0	113886.3	41	662	0.3183	Sarcoplasmic/endoplasmic reticulum calcium ATPase 3 isoform SERCA3B \Gname=ATP2A3 \NcbiTaxId=9606
nxp:NX_Q93084-2	999	0	109168	41	662	0.3323	Sarcoplasmic/endoplasmic reticulum calcium ATPase 3 isoform SERCA3A \Gname=ATP2A3 \NcbiTaxId=9606
nxp:NX_Q93084-3	1029	0	112399.8	41	662	0.3226	Sarcoplasmic/endoplasmic reticulum calcium ATPase 3 isoform SERCA3C \Gname=ATP2A3 \NcbiTaxId=9606
nxp:NX_Q93084-4	998	0	109039	41	662	0.3327	Sarcoplasmic/endoplasmic reticulum calcium ATPase 3 isoform SERCA3G \Gname=ATP2A3 \NcbiTaxId=9606
nxp:NX_Q93084-5	1052	0	114839	41	662	0.3156	Sarcoplasmic/endoplasmic reticulum calcium ATPase 3 isoform SERCA3E \Gname=ATP2A3 \NcbiTaxId=9606
nxp:NX_Q93084-6	1044	0	114039.4	41	662	0.318	Sarcoplasmic/endoplasmic reticulum calcium ATPase 3 isoform SERCA3D \Gname=ATP2A3 \NcbiTaxId=9606
nxp:NX_Q93084-7	1033	0	112687.9	41	662	0.3214	Sarcoplasmic/endoplasmic reticulum calcium ATPase 3 isoform SERCA3F \Gname=ATP2A3 \NcbiTaxId=9606
nxp:NX_O00429-2	725	0	80467.4	40	559	0.4097	Dynamin-1-like protein isoform Iso 4 \Gname=DNM1L \NcbiTaxId=9606
nxp:NX_P08238-1	724	15	83194.1	40	582	0.3826	Heat shock protein HSP 90-beta isoform Iso 1 \Gname=HSP90AB1 \NcbiTaxId=9606
nxp:NX_P09493-2	228	7	26645.5	40	344	0.5044	Tropomyosin alpha-1 chain isoform Iso 2 \Gname=TPM1 \NcbiTaxId=9606
nxp:NX_P19367-1	917	0	102402.1	40	585	0.3817	Hexokinase-1 isoform Iso 1 \Gname=HK1 \NcbiTaxId=9606
nxp:NX_P19367-2	916	0	102117.8	40	585	0.3821	Hexokinase-1 isoform Iso 2 \Gname=HK1 \NcbiTaxId=9606
nxp:NX_P19367-3	921	0	102654.2	40	585	0.38	Hexokinase-1 isoform Iso 3 \Gname=HK1 \NcbiTaxId=9606
nxp:NX_P19367-4	905	0	101002.4	40	585	0.3867	Hexokinase-1 isoform Iso 4 \Gname=HK1 \NcbiTaxId=9606
nxp:NX_P23229-1	1130	0	126508.2	40	589	0.3381	Integrin alpha-6 isoform Alpha-6X1X2B \Gname=ITGA6 \NcbiTaxId=9606
nxp:NX_P23229-3	1091	0	121959	40	589	0.3501	Integrin alpha-6 isoform Alpha-6X1B \Gname=ITGA6 \NcbiTaxId=9606
nxp:NX_P23229-5	1086	0	121570.9	40	589	0.3517	Integrin alpha-6 isoform Alpha-6X2B \Gname=ITGA6 \NcbiTaxId=9606
nxp:NX_P50552-1	380	40	39787.1	40	749	0.6158	Vasodilator-stimulated phosphoprotein isoform Iso 1 \Gname=VASP \NcbiTaxId=9606
nxp:NX_P55072-1	806	40	89247.7	40	451	0.4256	Transitional endoplasmic reticulum ATPase isoform Iso 1 \Gname=VCP \NcbiTaxId=9606
nxp:NX_Q14008-1	2032	0	225333.8	40	281	0.1998	Cytoskeleton-associated protein 5 isoform Iso 1 \Gname=CKAP5 \NcbiTaxId=9606
nxp:NX_Q14008-2	1972	0	218369.3	40	281	0.2059	Cytoskeleton-associated protein 5 isoform Iso 2 \Gname=CKAP5 \NcbiTaxId=9606
nxp:NX_Q14008-3	2039	0	226096	40	281	0.1991	Cytoskeleton-associated protein 5 isoform Iso 3 \Gname=CKAP5 \NcbiTaxId=9606
nxp:NX_Q14697-1	944	37	106788.6	40	473	0.3888	Neutral alpha-glucosidase AB isoform Iso 1 \Gname=GANAB \NcbiTaxId=9606
nxp:NX_O95810-1	425	38	47126.6	39	744	0.4894	Serum deprivation-response protein isoform Iso 1 \Gname=SDPR \NcbiTaxId=9606
nxp:NX_P04040-1	527	39	59700.7	39	673	0.575	Catalase isoform Iso 1 \Gname=CAT \NcbiTaxId=9606
nxp:NX_P11277-1	2137	0	246297.7	39	271	0.197	Spectrin beta chain. erythrocytic isoform Iso 1 \Gname=SPTB \NcbiTaxId=9606
nxp:NX_P16109-1	830	39	90755.2	39	644	0.4084	P-selectin isoform Iso 1 \Gname=SELP \NcbiTaxId=9606
nxp:NX_P16615-1	1042	14	114664.5	39	433	0.3033	Sarcoplasmic/endoplasmic reticulum calcium ATPase 2 isoform Iso 1 \Gname=ATP2A2 \NcbiTaxId=9606
nxp:NX_Q27J81-1	1249	24	135521.7	39	417	0.3379	Inverted formin-2 isoform Iso 1 \Gname=INF2 \NcbiTaxId=9606
nxp:NX_O00429-4	699	0	78033.2	38	455	0.392	Dynamin-1-like protein isoform Iso 3 \Gname=DNM1L \NcbiTaxId=9606
nxp:NX_O00429-5	710	0	79041.7	38	455	0.3859	Dynamin-1-like protein isoform Iso 5 \Gname=DNM1L \NcbiTaxId=9606
nxp:NX_P02751-1	2386	0	262442.1	38	368	0.2096	Fibronectin isoform Iso 1 \Gname=FN1 \NcbiTaxId=9606
nxp:NX_P02751-10	2176	0	239457.7	38	368	0.2298	Fibronectin isoform Iso 10 \Gname=FN1 \NcbiTaxId=9606
nxp:NX_P02751-11	2386	0	262224	38	368	0.2096	Fibronectin isoform Iso 11 \Gname=FN1 \NcbiTaxId=9606
nxp:NX_P02751-13	2267	0	249147.6	38	368	0.2206	Fibronectin isoform Iso 13 \Gname=FN1 \NcbiTaxId=9606
nxp:NX_P02751-14	2265	0	249227.7	38	368	0.2208	Fibronectin isoform Iso 14 \Gname=FN1 \NcbiTaxId=9606
nxp:NX_P02751-15	2477	0	272132	38	368	0.2019	Fibronectin isoform Iso 15 \Gname=FN1 \NcbiTaxId=9606
nxp:NX_P02751-17	2330	0	256323	38	368	0.2146	Fibronectin isoform Iso 17 \Gname=FN1 \NcbiTaxId=9606
nxp:NX_P02751-3	2355	0	259035.5	38	368	0.2123	Fibronectin isoform Iso 3 \Gname=FN1 \NcbiTaxId=9606
nxp:NX_P02751-7	2446	0	268725.4	38	368	0.2044	Fibronectin isoform Iso 7 \Gname=FN1 \NcbiTaxId=9606
nxp:NX_P02751-8	2296	0	252634.3	38	368	0.2178	Fibronectin isoform Iso 8 \Gname=FN1 \NcbiTaxId=9606
nxp:NX_P02751-9	2240	0	246515.3	38	368	0.2232	Fibronectin isoform Iso 9 \Gname=FN1 \NcbiTaxId=9606
nxp:NX_P07951-2	284	11	32951.6	38	381	0.5493	Tropomyosin beta chain isoform Iso 2 \Gname=TPM2 \NcbiTaxId=9606
nxp:NX_P27797-1	417	38	48093.8	38	648	0.6355	Calreticulin isoform Iso 1 \Gname=CALR \NcbiTaxId=9606
nxp:NX_P49327-1	2511	38	273236.3	38	266	0.1912	Fatty acid synthase isoform Iso 1 \Gname=FASN \NcbiTaxId=9606
nxp:NX_Q14766-2	1395	0	152814.1	38	75	0.3219	Latent-transforming growth factor beta-binding protein 1 isoform Short \Gname=LTBP1 \NcbiTaxId=9606
nxp:NX_P07359-1	626	37	68894	37	775	0.3466	Platelet glycoprotein Ib alpha chain isoform Iso 1 \Gname=GP1BA \NcbiTaxId=9606
nxp:NX_P07384-1	714	37	81820.2	37	889	0.3725	Calpain-1 catalytic subunit isoform Iso 1 \Gname=CAPN1 \NcbiTaxId=9606
nxp:NX_P07951-1	284	3	32812.6	37	459	0.4824	Tropomyosin beta chain isoform Iso 1 \Gname=TPM2 \NcbiTaxId=9606
nxp:NX_P08107-1	641	19	69991	37	657	0.4883	Heat shock 70 kDa protein 1A/1B isoform Iso 1 \Gname=HSPA1A;HSPA1B \NcbiTaxId=9606
nxp:NX_P27824-1	592	37	67507.8	37	538	0.5101	Calnexin isoform Iso 1 \Gname=CANX \NcbiTaxId=9606
nxp:NX_P69905-1	142	37	15229.9	37	808	0.8873	Hemoglobin subunit alpha isoform Iso 1 \Gname=HBA1;HBA2 \NcbiTaxId=9606
nxp:NX_Q70J99-1	1090	27	123186.7	37	692	0.3239	Protein unc-13 homolog D isoform Iso 1 \Gname=UNC13D \NcbiTaxId=9606
nxp:NX_P16615-2	997	0	109602.2	36	355	0.2919	Sarcoplasmic/endoplasmic reticulum calcium ATPase 2 isoform Iso 2 \Gname=ATP2A2 \NcbiTaxId=9606
nxp:NX_P16615-3	999	0	109804.3	36	355	0.2913	Sarcoplasmic/endoplasmic reticulum calcium ATPase 2 isoform Iso 3 \Gname=ATP2A2 \NcbiTaxId=9606
nxp:NX_P16615-5	997	0	109645.3	36	355	0.2919	Sarcoplasmic/endoplasmic reticulum calcium ATPase 2 isoform Iso 5 \Gname=ATP2A2 \NcbiTaxId=9606
nxp:NX_P48735-1	452	36	50858.9	36	685	0.5465	Isocitrate dehydrogenase [NADP]. mitochondrial isoform Iso 1 \Gname=IDH2 \NcbiTaxId=9606
nxp:NX_Q13748-2	418	0	46064.9	36	80	0.4928	Tubulin alpha-3C/D chain isoform Iso 2 \Gname=TUBA3C;TUBA3D \NcbiTaxId=9606
nxp:NX_Q27J81-2	1240	0	134515.4	36	339	0.3048	Inverted formin-2 isoform Iso 3 \Gname=INF2 \NcbiTaxId=9606
nxp:NX_Q70J99-3	1142	0	128720.5	36	620	0.2995	Protein unc-13 homolog D isoform Iso 3 \Gname=UNC13D \NcbiTaxId=9606
nxp:NX_O15144-1	300	35	34293.5	35	325	0.6667	Actin-related protein 2/3 complex subunit 2 isoform Iso 1 \Gname=ARPC2 \NcbiTaxId=9606
nxp:NX_P02042-1	147	6	16027.3	35	665	0.8163	Hemoglobin subunit delta isoform Iso 1 \Gname=HBD \NcbiTaxId=9606
nxp:NX_P61224-1	184	0	20793.6	35	571	0.625	Ras-related protein Rap-1b isoform Iso 1 \Gname=RAP1B \NcbiTaxId=9606
nxp:NX_P61224-3	165	0	18748.6	35	571	0.697	Ras-related protein Rap-1b isoform Iso 3 \Gname=RAP1B \NcbiTaxId=9606
nxp:NX_P11216-1	843	27	96616.5	34	507	0.3321	Glycogen phosphorylase. brain form isoform Iso 1 \Gname=PYGB \NcbiTaxId=9606
nxp:NX_P14543-1	1247	26	136272.7	34	492	0.32	Nidogen-1 isoform Iso 1 \Gname=NID1 \NcbiTaxId=9606
nxp:NX_Q9UBW5-1	565	30	61818.8	34	544	0.5363	Bridging integrator 2 isoform Iso 1 \Gname=BIN2 \NcbiTaxId=9606
nxp:NX_O15117-3	839	33	91577.3	33	444	0.3754	FYN-binding protein isoform FYB-130 \Gname=FYB \NcbiTaxId=9606
nxp:NX_O76074-1	875	0	99903.1	33	454	0.3349	cGMP-specific 3'.5'-cyclic phosphodiesterase isoform PDE5A1 \Gname=PDE5A \NcbiTaxId=9606
nxp:NX_O76074-2	833	0	94726.7	33	454	0.3517	cGMP-specific 3'.5'-cyclic phosphodiesterase isoform PDE5A2 \Gname=PDE5A \NcbiTaxId=9606
nxp:NX_P12931-1	536	20	59779	33	616	0.5261	Proto-oncogene tyrosine-protein kinase Src isoform Iso 1 \Gname=SRC \NcbiTaxId=9606
nxp:NX_P35609-1	894	2	103770.3	33	703	0.2159	Alpha-actinin-2 isoform Iso 1 \Gname=ACTN2 \NcbiTaxId=9606
nxp:NX_P50395-1	445	14	50612.9	33	449	0.5506	Rab GDP dissociation inhibitor beta isoform Iso 1 \Gname=GDI2 \NcbiTaxId=9606
nxp:NX_Q14644-1	834	33	95620.2	33	452	0.4017	Ras GTPase-activating protein 3 isoform Iso 1 \Gname=RASA3 \NcbiTaxId=9606
nxp:NX_Q7L576-1	1253	33	145070.7	33	317	0.2713	Cytoplasmic FMR1-interacting protein 1 isoform Iso 1 \Gname=CYFIP1 \NcbiTaxId=9606
nxp:NX_Q92619-1	1136	33	124518.4	33	384	0.2914	Minor histocompatibility protein HA-1 isoform Iso 1 \Gname=HMHA1 \NcbiTaxId=9606
nxp:NX_O00299-1	241	30	26887.7	32	623	0.7386	Chloride intracellular channel protein 1 isoform Iso 1 \Gname=CLIC1 \NcbiTaxId=9606
nxp:NX_P02751-5	2211	0	243163.9	32	320	0.1986	Fibronectin isoform Iso 5 \Gname=FN1 \NcbiTaxId=9606
nxp:NX_P02751-6	2184	0	240340	32	320	0.201	Fibronectin isoform Iso 6 \Gname=FN1 \NcbiTaxId=9606
nxp:NX_P07195-1	334	27	36597.1	32	858	0.5689	L-lactate dehydrogenase B chain isoform Iso 1 \Gname=LDHB \NcbiTaxId=9606
nxp:NX_P22314-1	1058	10	117756.3	32	403	0.345	Ubiquitin-like modifier-activating enzyme 1 isoform Iso 1 \Gname=UBA1 \NcbiTaxId=9606
nxp:NX_P29144-1	1249	32	138244.6	32	337	0.2626	Tripeptidyl-peptidase 2 isoform Iso 1 \Gname=TPP2 \NcbiTaxId=9606
nxp:NX_Q13642-4	309	0	34955.4	32	562	0.6602	Four and a half LIM domains protein 1 isoform Iso 4 \Gname=FHL1 \NcbiTaxId=9606
nxp:NX_Q13642-5	296	0	33537.6	32	562	0.6892	Four and a half LIM domains protein 1 isoform Iso 1 \Gname=FHL1 \NcbiTaxId=9606
nxp:NX_Q9Y613-1	1164	32	126454.5	32	444	0.3273	FH1/FH2 domain-containing protein 1 isoform Iso 1 \Gname=FHOD1 \NcbiTaxId=9606
nxp:NX_Q9Y6C2-1	1016	32	106583.4	32	506	0.3681	EMILIN-1 isoform Iso 1 \Gname=EMILIN1 \NcbiTaxId=9606
nxp:NX_P14543-2	1114	0	121922.8	31	367	0.3169	Nidogen-1 isoform Iso 2 \Gname=NID1 \NcbiTaxId=9606
nxp:NX_P43304-1	727	31	80783.6	31	382	0.4072	Glycerol-3-phosphate dehydrogenase. mitochondrial isoform Iso 2 \Gname=GPD2 \NcbiTaxId=9606
nxp:NX_Q14247-1	550	0	61530.5	31	393	0.3582	Src substrate cortactin isoform Iso 1 \Gname=CTTN \NcbiTaxId=9606
nxp:NX_Q14247-3	513	1	57413.5	31	394	0.384	Src substrate cortactin isoform Iso 3 \Gname=CTTN \NcbiTaxId=9606
nxp:NX_Q15404-1	277	31	31502.7	31	326	0.7184	Ras suppressor protein 1 isoform Iso 2 \Gname=RSU1 \NcbiTaxId=9606
nxp:NX_Q5JSH3-1	913	0	101285.7	31	414	0.3176	WD repeat-containing protein 44 isoform Iso 1 \Gname=WDR44 \NcbiTaxId=9606
nxp:NX_Q5JSH3-2	905	0	100323.2	31	414	0.3204	WD repeat-containing protein 44 isoform Iso 2 \Gname=WDR44 \NcbiTaxId=9606
nxp:NX_O15143-1	372	29	40905.4	30	581	0.5215	Actin-related protein 2/3 complex subunit 1B isoform Iso 1 \Gname=ARPC1B \NcbiTaxId=9606
nxp:NX_P11413-2	561	0	63768.3	30	526	0.4332	Glucose-6-phosphate 1-dehydrogenase isoform Long \Gname=G6PD \NcbiTaxId=9606
nxp:NX_P11413-3	545	0	62410.6	30	526	0.4459	Glucose-6-phosphate 1-dehydrogenase isoform Short \Gname=G6PD \NcbiTaxId=9606
nxp:NX_P53621-1	1224	0	138239.9	30	281	0.2696	Coatomer subunit alpha isoform Iso 1 \Gname=COPA \NcbiTaxId=9606
nxp:NX_P53621-2	1233	0	139217.3	30	281	0.2676	Coatomer subunit alpha isoform Iso 2 \Gname=COPA \NcbiTaxId=9606
nxp:NX_P61158-1	418	30	47323	30	733	0.6005	Actin-related protein 3 isoform Iso 1 \Gname=ACTR3 \NcbiTaxId=9606
nxp:NX_P62258-1	255	17	29137.4	30	875	0.4706	14-3-3 protein epsilon isoform SV \Gname=YWHAE \NcbiTaxId=9606
nxp:NX_Q96C24-1	671	30	75957.8	30	495	0.3607	Synaptotagmin-like protein 4 isoform Iso 1 \Gname=SYTL4 \NcbiTaxId=9606
nxp:NX_P01024-1	1663	29	187011.9	29	187	0.2032	Complement C3 isoform Iso 1 \Gname=C3 \NcbiTaxId=9606
nxp:NX_P02751-12	2008	0	221134.3	29	269	0.1887	Fibronectin isoform Iso 16 \Gname=FN1 \NcbiTaxId=9606
nxp:NX_P02775-1	128	29	13867.4	29	1166	0.4219	Platelet basic protein isoform Iso 1 \Gname=PPBP \NcbiTaxId=9606
nxp:NX_P12931-2	542	0	60532.4	29	280	0.4373	Proto-oncogene tyrosine-protein kinase Src isoform Iso 2 \Gname=SRC \NcbiTaxId=9606
nxp:NX_P25705-1	553	29	59695.6	29	496	0.3816	ATP synthase subunit alpha. mitochondrial isoform Iso 2 \Gname=ATP5A1 \NcbiTaxId=9606
nxp:NX_P27348-1	245	11	27728.8	29	705	0.5347	14-3-3 protein theta isoform Iso 1 \Gname=YWHAQ \NcbiTaxId=9606
nxp:NX_Q8N392-1	663	29	74911.9	29	311	0.4238	Rho GTPase-activating protein 18 isoform Iso 2 \Gname=ARHGAP18 \NcbiTaxId=9606
nxp:NX_O75369-1	2602	0	277972	28	202	0.0584	Filamin-B isoform Iso 1 \Gname=FLNB \NcbiTaxId=9606
nxp:NX_O75369-2	2578	0	275477.9	28	202	0.059	Filamin-B isoform Iso 2 \Gname=FLNB \NcbiTaxId=9606
nxp:NX_O75369-3	2561	0	273719.7	28	202	0.0594	Filamin-B isoform Iso 3 \Gname=FLNB \NcbiTaxId=9606
nxp:NX_O75369-6	2537	0	271225.6	28	202	0.0599	Filamin-B isoform Iso 6 \Gname=FLNB \NcbiTaxId=9606
nxp:NX_O75369-8	2633	0	281440.7	28	202	0.0577	Filamin-B isoform Iso 8 \Gname=FLNB \NcbiTaxId=9606
nxp:NX_O75369-9	2591	0	276747.5	28	202	0.0587	Filamin-B isoform Iso 9 \Gname=FLNB \NcbiTaxId=9606
nxp:NX_P05556-1	798	28	88339	28	680	0.297	Integrin beta-1 isoform Beta-1A \Gname=ITGB1 \NcbiTaxId=9606
nxp:NX_P06576-1	529	28	56506.6	28	567	0.4291	ATP synthase subunit beta. mitochondrial isoform Iso 1 \Gname=ATP5B \NcbiTaxId=9606
nxp:NX_P06737-1	847	0	97069	28	407	0.2774	Glycogen phosphorylase. liver form isoform Iso 1 \Gname=PYGL \NcbiTaxId=9606
nxp:NX_P06737-2	813	0	93057.1	28	407	0.2891	Glycogen phosphorylase. liver form isoform Iso 2 \Gname=PYGL \NcbiTaxId=9606
nxp:NX_P16284-1	738	0	82465.8	28	530	0.3753	Platelet endothelial cell adhesion molecule isoform Long \Gname=PECAM1 \NcbiTaxId=9606
nxp:NX_P16284-2	720	0	80409.9	28	530	0.3847	Platelet endothelial cell adhesion molecule isoform Delta12 \Gname=PECAM1 \NcbiTaxId=9606
nxp:NX_P16284-3	717	0	80137.7	28	530	0.3863	Platelet endothelial cell adhesion molecule isoform Delta13 \Gname=PECAM1 \NcbiTaxId=9606
nxp:NX_P29350-1	595	0	67501	28	405	0.4202	Tyrosine-protein phosphatase non-receptor type 6 isoform Iso 1 \Gname=PTPN6 \NcbiTaxId=9606
nxp:NX_P29350-3	597	0	67659.1	28	405	0.4188	Tyrosine-protein phosphatase non-receptor type 6 isoform Iso 2 \Gname=PTPN6 \NcbiTaxId=9606
nxp:NX_P31146-1	461	27	50975.8	28	617	0.4469	Coronin-1A isoform Iso 1 \Gname=CORO1A \NcbiTaxId=9606
nxp:NX_P35527-1	623	24	62008.8	28	384	0.4222	Keratin. type I cytoskeletal 9 isoform Iso 1 \Gname=KRT9 \NcbiTaxId=9606
nxp:NX_P50395-2	400	0	45572.2	28	317	0.5625	Rab GDP dissociation inhibitor beta isoform Iso 2 \Gname=GDI2 \NcbiTaxId=9606
nxp:NX_P52209-1	483	28	53087.9	28	319	0.5052	6-phosphogluconate dehydrogenase. decarboxylating isoform Iso 1 \Gname=PGD \NcbiTaxId=9606
nxp:NX_P60174-3	286	28	30753.7	28	751	0.7972	Triosephosphate isomerase isoform Iso 4 \Gname=TPI1 \NcbiTaxId=9606
nxp:NX_P78417-1	241	28	27530	28	485	0.5768	Glutathione S-transferase omega-1 isoform Iso 3 \Gname=GSTO1 \NcbiTaxId=9606
nxp:NX_Q14315-1	2725	0	290822.6	28	203	0.0591	Filamin-C isoform Iso 1 \Gname=FLNC \NcbiTaxId=9606
nxp:NX_Q14315-2	2692	0	287083.8	28	203	0.0598	Filamin-C isoform Iso 2 \Gname=FLNC \NcbiTaxId=9606
nxp:NX_Q9BSJ8-1	1104	0	122761.9	28	295	0.3261	Extended synaptotagmin-1 isoform Iso 1 \Gname=ESYT1 \NcbiTaxId=9606
nxp:NX_Q9BSJ8-2	1114	0	123907.5	28	295	0.3232	Extended synaptotagmin-1 isoform Iso 2 \Gname=ESYT1 \NcbiTaxId=9606
nxp:NX_O60610-1	1272	0	141239.5	27	308	0.2178	Protein diaphanous homolog 1 isoform Iso 1 \Gname=DIAPH1 \NcbiTaxId=9606
nxp:NX_O60610-2	1248	0	138801.3	27	308	0.222	Protein diaphanous homolog 1 isoform Iso 2 \Gname=DIAPH1 \NcbiTaxId=9606
nxp:NX_O60610-3	1263	0	140182	27	308	0.2193	Protein diaphanous homolog 1 isoform Iso 3 \Gname=DIAPH1 \NcbiTaxId=9606
nxp:NX_P04350-1	444	1	49535.9	27	74	0.4505	Tubulin beta-4A chain isoform Iso 1 \Gname=TUBB4A \NcbiTaxId=9606
nxp:NX_P04843-1	607	27	68508.8	27	344	0.4728	Dolichyl-diphosphooligosaccharide--protein glycosyltransferase subunit 1 isoform Iso 1 \Gname=RPN1 \NcbiTaxId=9606
nxp:NX_P10809-1	573	27	60998.4	27	519	0.445	60 kDa heat shock protein. mitochondrial isoform Iso 1 \Gname=HSPD1 \NcbiTaxId=9606
nxp:NX_P13224-2	411	1	43112	27	488	0.2482	Platelet glycoprotein Ib beta chain isoform Iso 2 \Gname=GP1BB \NcbiTaxId=9606
nxp:NX_P17987-1	556	26	60287.6	27	397	0.4514	T-complex protein 1 subunit alpha isoform Iso 1 \Gname=TCP1 \NcbiTaxId=9606
nxp:NX_P23219-1	599	0	68623.7	27	325	0.3523	Prostaglandin G/H synthase 1 isoform Iso 1 \Gname=PTGS1 \NcbiTaxId=9606
nxp:NX_P23219-2	562	1	64452.7	27	326	0.3754	Prostaglandin G/H synthase 1 isoform Iso 2 \Gname=PTGS1 \NcbiTaxId=9606
nxp:NX_P24844-1	172	9	19796.4	27	369	0.6221	Myosin regulatory light polypeptide 9 isoform Iso 1 \Gname=MYL9 \NcbiTaxId=9606
nxp:NX_P30740-1	379	26	42696.7	27	659	0.4617	Leukocyte elastase inhibitor isoform Iso 1 \Gname=SERPINB1 \NcbiTaxId=9606
nxp:NX_P61160-2	399	1	45329.5	27	380	0.4762	Actin-related protein 2 isoform Iso 2 \Gname=ACTR2 \NcbiTaxId=9606
nxp:NX_P62834-1	184	1	20955.7	27	131	0.5435	Ras-related protein Rap-1A isoform Iso 1 \Gname=RAP1A \NcbiTaxId=9606
nxp:NX_Q13045-1	1269	1	144641.5	27	295	0.2206	Protein flightless-1 homolog isoform Iso 1 \Gname=FLII \NcbiTaxId=9606
nxp:NX_Q14204-1	4646	27	532053.8	27	113	0.0616	Cytoplasmic dynein 1 heavy chain 1 isoform Iso 1 \Gname=DYNC1H1 \NcbiTaxId=9606
nxp:NX_Q14697-2	966	0	109351	27	89	0.2723	Neutral alpha-glucosidase AB isoform Iso 2 \Gname=GANAB \NcbiTaxId=9606
nxp:NX_Q86VP6-1	1230	25	136270.6	27	296	0.2293	Cullin-associated NEDD8-dissociated protein 1 isoform Iso 1 \Gname=CAND1 \NcbiTaxId=9606
nxp:NX_A6NNZ2-1	444	0	49522.6	26	147	0.2297	Tubulin beta-8 chain-like protein LOC260334 isoform Iso 1 \Gname=null \NcbiTaxId=9606
nxp:NX_P09211-1	210	26	23323	26	444	0.6333	Glutathione S-transferase P isoform Iso 1 \Gname=GSTP1 \NcbiTaxId=9606
nxp:NX_P13224-1	206	0	21685.8	26	487	0.4951	Platelet glycoprotein Ib beta chain isoform Iso 1 \Gname=GP1BB \NcbiTaxId=9606
nxp:NX_P47756-2	272	26	30591.4	26	389	0.5515	F-actin-capping protein subunit beta isoform Iso 2 \Gname=CAPZB \NcbiTaxId=9606
nxp:NX_P51659-1	736	26	79618.3	26	397	0.4144	Peroxisomal multifunctional enzyme type 2 isoform Iso 1 \Gname=HSD17B4 \NcbiTaxId=9606
nxp:NX_P61160-1	394	0	44714.2	26	379	0.4467	Actin-related protein 2 isoform Iso 1 \Gname=ACTR2 \NcbiTaxId=9606
nxp:NX_P62328-1	44	26	5031.5	26	405	0.7955	Thymosin beta-4 isoform Iso 1 \Gname=TMSB4X \NcbiTaxId=9606
nxp:NX_Q05209-1	780	25	88033.4	26	262	0.3295	Tyrosine-protein phosphatase non-receptor type 12 isoform Iso 2 \Gname=PTPN12 \NcbiTaxId=9606
nxp:NX_Q08043-1	901	0	103158	26	595	0.1332	Alpha-actinin-3 isoform Iso 1 \Gname=ACTN3 \NcbiTaxId=9606
nxp:NX_Q13045-2	1214	0	138387.1	26	287	0.2142	Protein flightless-1 homolog isoform Iso 2 \Gname=FLII \NcbiTaxId=9606
nxp:NX_Q3ZCM7-1	444	0	49725.9	26	147	0.2297	Tubulin beta-8 chain isoform Iso 1 \Gname=TUBB8 \NcbiTaxId=9606
nxp:NX_O14950-1	172	0	19748.5	25	339	0.6047	Myosin regulatory light chain 12B isoform Iso 1 \Gname=MYL12B \NcbiTaxId=9606
nxp:NX_P06744-1	558	13	63089.2	25	397	0.4211	Glucose-6-phosphate isomerase isoform Iso 1 \Gname=GPI \NcbiTaxId=9606
nxp:NX_P18054-1	663	25	75627.3	25	270	0.3484	Arachidonate 12-lipoxygenase. 12S-type isoform Iso 1 \Gname=ALOX12 \NcbiTaxId=9606
nxp:NX_P19105-1	171	0	19763.5	25	339	0.6082	Myosin regulatory light chain 12A isoform Iso 1 \Gname=MYL12A \NcbiTaxId=9606
nxp:NX_P24557-1	533	25	60461.1	25	367	0.3734	Thromboxane-A synthase isoform Iso 2 \Gname=TBXAS1 \NcbiTaxId=9606
nxp:NX_Q04917-1	246	13	28183	25	681	0.4715	14-3-3 protein eta isoform Iso 1 \Gname=YWHAH \NcbiTaxId=9606
nxp:NX_Q8WUM4-1	868	0	95945.1	25	362	0.3111	Programmed cell death 6-interacting protein isoform Iso 1 \Gname=PDCD6IP \NcbiTaxId=9606
nxp:NX_Q8WUM4-2	873	0	96693.4	25	362	0.3093	Programmed cell death 6-interacting protein isoform Iso 2 \Gname=PDCD6IP \NcbiTaxId=9606
nxp:NX_Q9NVA2-1	429	0	49349.2	25	222	0.4802	Septin-11 isoform Iso 1 \Gname=SEPT11 \NcbiTaxId=9606
nxp:NX_Q9NVA2-2	439	0	50772.9	25	222	0.4692	Septin-11 isoform Iso 2 \Gname=SEPT11 \NcbiTaxId=9606
nxp:NX_P00338-3	361	19	39793.9	24	653	0.4155	L-lactate dehydrogenase A chain isoform Iso 1 \Gname=LDHA \NcbiTaxId=9606
nxp:NX_P00387-1	301	0	34194.7	24	308	0.5847	NADH-cytochrome b5 reductase 3 isoform Iso 2 \Gname=CYB5R3 \NcbiTaxId=9606
nxp:NX_P00387-3	334	0	38183.6	24	308	0.5269	NADH-cytochrome b5 reductase 3 isoform Iso 3 \Gname=CYB5R3 \NcbiTaxId=9606
nxp:NX_P00491-1	289	24	32079.1	24	501	0.5606	Purine nucleoside phosphorylase isoform Iso 1 \Gname=PNP \NcbiTaxId=9606
nxp:NX_P04792-1	205	24	22750.5	24	618	0.722	Heat shock protein beta-1 isoform Iso 1 \Gname=HSPB1 \NcbiTaxId=9606
nxp:NX_P16615-4	1015	0	111756.9	24	67	0.2315	Sarcoplasmic/endoplasmic reticulum calcium ATPase 2 isoform Iso 4 \Gname=ATP2A2 \NcbiTaxId=9606
nxp:NX_P27105-1	288	24	31692.7	24	432	0.5104	Erythrocyte band 7 integral membrane protein isoform Iso 1 \Gname=STOM \NcbiTaxId=9606
nxp:NX_P30041-1	224	24	25001.2	24	503	0.6116	Peroxiredoxin-6 isoform Iso 1 \Gname=PRDX6 \NcbiTaxId=9606
nxp:NX_P31946-1	246	8	28046.8	24	677	0.5041	14-3-3 protein beta/alpha isoform Short \Gname=YWHAB \NcbiTaxId=9606
nxp:NX_P35908-1	639	17	65375.2	24	283	0.4225	Keratin. type II cytoskeletal 2 epidermal isoform Iso 1 \Gname=KRT2 \NcbiTaxId=9606
nxp:NX_P53396-1	1101	5	120743.9	24	217	0.2679	ATP-citrate synthase isoform Iso 1 \Gname=ACLY \NcbiTaxId=9606
nxp:NX_P54577-1	528	24	59088.1	24	298	0.4432	Tyrosine--tRNA ligase. cytoplasmic isoform Iso 1 \Gname=YARS \NcbiTaxId=9606
nxp:NX_P62937-1	165	23	17982.9	24	541	0.7818	Peptidyl-prolyl cis-trans isomerase A isoform Iso 1 \Gname=PPIA \NcbiTaxId=9606
nxp:NX_Q01813-1	784	19	85523.5	24	271	0.2793	6-phosphofructokinase type C isoform Iso 1 \Gname=PFKP \NcbiTaxId=9606
nxp:NX_Q12913-1	1337	24	145832.7	24	317	0.2221	Receptor-type tyrosine-protein phosphatase eta isoform Iso 1 \Gname=PTPRJ \NcbiTaxId=9606
nxp:NX_Q13586-1	685	24	77357.3	24	477	0.3212	Stromal interaction molecule 1 isoform Iso 1 \Gname=STIM1 \NcbiTaxId=9606
nxp:NX_Q15084-1	440	0	48073.3	24	584	0.5205	Protein disulfide-isomerase A6 isoform Iso 1 \Gname=PDIA6 \NcbiTaxId=9606
nxp:NX_Q15084-2	492	0	53849.1	24	584	0.4654	Protein disulfide-isomerase A6 isoform Iso 2 \Gname=PDIA6 \NcbiTaxId=9606
nxp:NX_Q15555-1	327	14	36990.2	24	388	0.526	Microtubule-associated protein RP/EB family member 2 isoform Iso 1 \Gname=MAPRE2 \NcbiTaxId=9606
nxp:NX_Q6ZNJ1-1	2754	0	302307.6	24	151	0.1147	Neurobeachin-like protein 2 isoform Iso 1 \Gname=NBEAL2 \NcbiTaxId=9606
nxp:NX_Q6ZNJ1-3	2724	0	299134.9	24	151	0.116	Neurobeachin-like protein 2 isoform Iso 3 \Gname=NBEAL2 \NcbiTaxId=9606
nxp:NX_Q99798-1	780	24	85353.9	24	218	0.3308	Aconitate hydratase. mitochondrial isoform Iso 1 \Gname=ACO2 \NcbiTaxId=9606
nxp:NX_Q9UBW5-2	533	0	57977	24	282	0.4428	Bridging integrator 2 isoform Iso 2 \Gname=BIN2 \NcbiTaxId=9606
nxp:NX_Q9UDY2-1	1190	0	133858.3	24	252	0.2336	Tight junction protein ZO-2 isoform C1 \Gname=TJP2 \NcbiTaxId=9606
nxp:NX_Q9UDY2-7	1221	0	137240.1	24	252	0.2277	Tight junction protein ZO-2 isoform Iso 7 \Gname=TJP2 \NcbiTaxId=9606
nxp:NX_O00194-1	218	23	24574.2	23	498	0.7339	Ras-related protein Rab-27B isoform Iso 1 \Gname=RAB27B \NcbiTaxId=9606
nxp:NX_P02751-4	2031	0	222818.6	23	132	0.1654	Fibronectin isoform Iso 4 \Gname=FN1 \NcbiTaxId=9606
nxp:NX_P04899-1	355	0	40407	23	287	0.5324	Guanine nucleotide-binding protein G(i) subunit alpha-2 isoform Iso 1 \Gname=GNA12 \NcbiTaxId=9606
nxp:NX_P04899-4	366	0	41503.6	23	287	0.5164	Guanine nucleotide-binding protein G(i) subunit alpha-2 isoform sGi2 \Gname=GNA12 \NcbiTaxId=9606
nxp:NX_P09104-1	434	14	47221	23	275	0.4562	Gamma-enolase isoform Iso 1 \Gname=ENO2 \NcbiTaxId=9606
nxp:NX_P13645-1	584	0	58773.7	23	261	0.2603	Keratin. type I cytoskeletal 10 isoform Iso 1 \Gname=KRT10 \NcbiTaxId=9606
nxp:NX_P29350-2	556	1	63067.7	23	171	0.3777	Tyrosine-protein phosphatase non-receptor type 6 isoform Iso 3 \Gname=PTPN6 \NcbiTaxId=9606
nxp:NX_P38646-1	679	20	73616.8	23	321	0.352	Stress-70 protein. mitochondrial isoform Iso 1 \Gname=HSPA9 \NcbiTaxId=9606
nxp:NX_P40926-1	338	23	35462.7	23	503	0.6065	Malate dehydrogenase. mitochondrial isoform Iso 1 \Gname=MDH2 \NcbiTaxId=9606
nxp:NX_P47755-1	286	15	32910.6	23	359	0.6119	F-actin-capping protein subunit alpha-2 isoform Iso 1 \Gname=CAPZA2 \NcbiTaxId=9606
nxp:NX_P50851-1	2863	0	318888	23	93	0.0922	Lipopolysaccharide-responsive and beige-like anchor protein isoform Iso 1 \Gname=LRBA \NcbiTaxId=9606
nxp:NX_P53396-2	1091	0	119677.3	23	211	0.2576	ATP-citrate synthase isoform Iso 2 \Gname=ACLY \NcbiTaxId=9606
nxp:NX_Q0ZGT2-1	675	0	80590.7	23	362	0.2237	Nexilin isoform Iso 1 \Gname=NEXN \NcbiTaxId=9606
nxp:NX_Q0ZGT2-4	611	1	72669.4	23	363	0.2471	Nexilin isoform Iso 4 \Gname=NEXN \NcbiTaxId=9606
nxp:NX_Q13423-1	1086	23	113804.5	23	269	0.2376	NAD(P) transhydrogenase. mitochondrial isoform Iso 1 \Gname=NNT \NcbiTaxId=9606
nxp:NX_Q14847-1	261	0	29680.2	23	335	0.5134	LIM and SH3 domain protein 1 isoform Iso 1 \Gname=LASP1 \NcbiTaxId=9606
nxp:NX_Q14847-2	323	0	35972.7	23	335	0.4149	LIM and SH3 domain protein 1 isoform Iso 2 \Gname=LASP1 \NcbiTaxId=9606
nxp:NX_Q7KZF4-1	910	23	101915.5	23	173	0.2901	Staphylococcal nuclease domain-containing protein 1 isoform Iso 1 \Gname=SND1 \NcbiTaxId=9606
nxp:NX_Q9NR12-1	457	22	49794.6	23	339	0.4902	PDZ and LIM domain protein 7 isoform Iso 5 \Gname=PDLIM7 \NcbiTaxId=9606
nxp:NX_Q9UJU6-1	430	19	48159.6	23	267	0.5628	Drebrin-like protein isoform Iso 1 \Gname=DBNL \NcbiTaxId=9606
nxp:NX_Q9Y277-1	283	21	30621.3	23	386	0.53	Voltage-dependent anion-selective channel protein 3 isoform Iso 1 \Gname=VDAC3 \NcbiTaxId=9606
nxp:NX_P00441-1	154	22	15907.9	22	225	0.7597	Superoxide dismutase [Cu-Zn] isoform Iso 1 \Gname=SOD1 \NcbiTaxId=9606
nxp:NX_P09486-1	303	22	34591.7	22	437	0.4587	SPARC isoform Iso 1 \Gname=SPARC \NcbiTaxId=9606
nxp:NX_P10316-1	365	4	40933.2	22	143	0.5041	HLA class I histocompatibility antigen. A-69 alpha chain isoform Iso 1 \Gname=HLA-A \NcbiTaxId=9606
nxp:NX_P16671-1	472	22	53001.2	22	377	0.3051	Platelet glycoprotein 4 isoform Iso 1 \Gname=CD36 \NcbiTaxId=9606
nxp:NX_P17301-1	1181	22	129195.8	22	282	0.2142	Integrin alpha-2 isoform Iso 1 \Gname=ITGA2 \NcbiTaxId=9606
nxp:NX_P29401-1	623	0	67816.7	22	382	0.4013	Transketolase isoform Iso 1 \Gname=TKT \NcbiTaxId=9606
nxp:NX_P29401-2	631	0	68752.1	22	382	0.3962	Transketolase isoform Iso 2 \Gname=TKT \NcbiTaxId=9606
nxp:NX_P31150-1	447	11	50532.1	22	261	0.4832	Rab GDP dissociation inhibitor alpha isoform Iso 1 \Gname=GDI1 \NcbiTaxId=9606
nxp:NX_P31948-1	543	22	62581.4	22	287	0.3425	Stress-induced-phosphoprotein 1 isoform Iso 1 \Gname=STIP1 \NcbiTaxId=9606
nxp:NX_P55786-1	919	22	103192.7	22	260	0.2361	Puromycin-sensitive aminopeptidase isoform Iso 1 \Gname=NPEPPS \NcbiTaxId=9606
nxp:NX_P60660-2	151	14	16932.1	22	451	0.7086	Myosin light polypeptide 6 isoform Smooth muscle \Gname=MYL6 \NcbiTaxId=9606
nxp:NX_Q13813-1	2472	0	284346.2	22	60	0.0918	Spectrin alpha chain. non-erythrocytic 1 isoform Iso 1 \Gname=SPTAN1 \NcbiTaxId=9606
nxp:NX_Q13813-2	2477	0	284900.6	22	60	0.0916	Spectrin alpha chain. non-erythrocytic 1 isoform Iso 2 \Gname=SPTAN1 \NcbiTaxId=9606
nxp:NX_Q13813-3	2452	0	282090	22	60	0.0926	Spectrin alpha chain. non-erythrocytic 1 isoform Iso 3 \Gname=SPTAN1 \NcbiTaxId=9606
nxp:NX_Q14141-1	434	0	49667.3	22	219	0.4516	Septin-6 isoform II \Gname=SEPT6 \NcbiTaxId=9606
nxp:NX_Q14141-4	429	0	49118.1	22	219	0.4569	Septin-6 isoform I \Gname=SEPT6 \NcbiTaxId=9606
nxp:NX_Q6ZNJ1-2	2570	0	282664.3	22	83	0.1093	Neurobeachin-like protein 2 isoform Iso 2 \Gname=NBEAL2 \NcbiTaxId=9606
nxp:NX_Q9NQ75-1	786	21	87072.2	22	230	0.369	Cas scaffolding protein family member 4 isoform Iso 1 \Gname=CASS4 \NcbiTaxId=9606
nxp:NX_Q9NYU2-1	1555	22	177060	22	190	0.1807	UDP-glucose:glycoprotein glucosyltransferase 1 isoform Iso 2 \Gname=UGGT1 \NcbiTaxId=9606
nxp:NX_Q9Y4L1-1	999	22	111248.2	22	217	0.2272	Hypoxia up-regulated protein 1 isoform Iso 1 \Gname=HYOU1 \NcbiTaxId=9606
nxp:NX_P11277-3	2106	0	242634	21	127	0.1121	Spectrin beta chain. erythrocytic isoform Iso 3 \Gname=SPTB \NcbiTaxId=9606
nxp:NX_P26641-1	437	21	50069.1	21	344	0.4142	Elongation factor 1-gamma isoform Iso 1 \Gname=EEF1G \NcbiTaxId=9606
nxp:NX_P36871-1	562	21	61392.5	21	306	0.427	Phosphoglucomutase-1 isoform Iso 3 \Gname=PGM1 \NcbiTaxId=9606
nxp:NX_P49368-1	545	15	60477.3	21	299	0.3376	T-complex protein 1 subunit gamma isoform Iso 1 \Gname=CCT3 \NcbiTaxId=9606
nxp:NX_P49748-1	655	0	70327.4	21	283	0.3908	Very long-chain specific acyl-CoA dehydrogenase. mitochondrial isoform Iso 1 \Gname=ACADVL \NcbiTaxId=9606
nxp:NX_P49748-3	678	0	72862.7	21	283	0.3776	Very long-chain specific acyl-CoA dehydrogenase. mitochondrial isoform Iso 3 \Gname=ACADVL \NcbiTaxId=9606
nxp:NX_P50990-1	548	21	59564.5	21	339	0.3923	T-complex protein 1 subunit theta isoform Iso 1 \Gname=CCT8 \NcbiTaxId=9606
nxp:NX_P55145-1	182	21	20668.8	21	298	0.6374	Mesencephalic astrocyte-derived neurotrophic factor isoform Iso 1 \Gname=MANF \NcbiTaxId=9606
nxp:NX_Q14554-1	519	21	59538.1	21	294	0.4239	Protein disulfide-isomerase A5 isoform Iso 1 \Gname=PDIA5 \NcbiTaxId=9606
nxp:NX_Q15746-1	1914	0	210564.8	21	285	0.1379	Myosin light chain kinase. smooth muscle isoform Iso 1 \Gname=MYLK \NcbiTaxId=9606
nxp:NX_Q15746-2	1845	0	202910	21	285	0.1431	Myosin light chain kinase. smooth muscle isoform Iso 6 \Gname=MYLK \NcbiTaxId=9606
nxp:NX_Q99497-1	189	21	19860.5	21	380	0.672	Protein DJ-1 isoform Iso 1 \Gname=PARK7 \NcbiTaxId=9606
nxp:NX_P05141-1	298	5	32813.1	20	545	0.453	ADP/ATP translocase 2 isoform Iso 1 \Gname=SLC25A5 \NcbiTaxId=9606
nxp:NX_P13667-1	645	20	72869	20	293	0.3023	Protein disulfide-isomerase A4 isoform Iso 1 \Gname=PDIA4 \NcbiTaxId=9606
nxp:NX_P21291-1	193	20	20535.8	20	548	0.6684	Cysteine and glycine-rich protein 1 isoform Iso 1 \Gname=CSRP1 \NcbiTaxId=9606
nxp:NX_P21926-1	228	20	25381	20	295	0.2544	CD9 antigen isoform Iso 1 \Gname=CD9 \NcbiTaxId=9606
nxp:NX_P35241-5	604	10	70986.6	20	425	0.255	Radixin isoform Iso 1 \Gname=RDX \NcbiTaxId=9606
nxp:NX_P49368-2	507	0	56377.2	20	222	0.3432	T-complex protein 1 subunit gamma isoform Iso 2 \Gname=CCT3 \NcbiTaxId=9606
nxp:NX_P63010-1	937	0	104468	20	204	0.1782	AP-2 complex subunit beta isoform Iso 1 \Gname=AP2B1 \NcbiTaxId=9606
nxp:NX_P63010-2	951	0	105606.6	20	204	0.1756	AP-2 complex subunit beta isoform Iso 2 \Gname=AP2B1 \NcbiTaxId=9606
nxp:NX_Q13045-3	1258	0	143543	20	165	0.1685	Protein flightless-1 homolog isoform Iso 3 \Gname=FLII \NcbiTaxId=9606
nxp:NX_Q14643-1	2758	0	313711.4	20	106	0.0769	Inositol 1.4.5-trisphosphate receptor type 1 isoform Iso 1 \Gname=ITPR1 \NcbiTaxId=9606
nxp:NX_Q14643-2	2743	0	311946.7	20	106	0.0773	Inositol 1.4.5-trisphosphate receptor type 1 isoform Iso 2 \Gname=ITPR1 \NcbiTaxId=9606
nxp:NX_Q14643-3	2710	0	308324.7	20	106	0.0782	Inositol 1.4.5-trisphosphate receptor type 1 isoform Iso 3 \Gname=ITPR1 \NcbiTaxId=9606
nxp:NX_Q14643-4	2695	0	306560	20	106	0.0787	Inositol 1.4.5-trisphosphate receptor type 1 isoform Iso 4 \Gname=ITPR1 \NcbiTaxId=9606
nxp:NX_Q14643-5	2734	0	310919.2	20	106	0.0775	Inositol 1.4.5-trisphosphate receptor type 1 isoform Iso 5 \Gname=ITPR1 \NcbiTaxId=9606
nxp:NX_Q14643-6	2743	0	311915.4	20	106	0.0773	Inositol 1.4.5-trisphosphate receptor type 1 isoform Iso 6 \Gname=ITPR1 \NcbiTaxId=9606
nxp:NX_Q14643-7	2728	0	310150.7	20	106	0.0777	Inositol 1.4.5-trisphosphate receptor type 1 isoform Iso 7 \Gname=ITPR1 \NcbiTaxId=9606
nxp:NX_Q14643-8	2719	0	309123.2	20	106	0.078	Inositol 1.4.5-trisphosphate receptor type 1 isoform Iso 8 \Gname=ITPR1 \NcbiTaxId=9606
nxp:NX_Q15555-3	315	0	35700.5	20	339	0.4508	Microtubule-associated protein RP/EB family member 2 isoform Iso 3 \Gname=MAPRE2 \NcbiTaxId=9606
nxp:NX_Q16643-1	649	16	71367.4	20	281	0.3359	Drebrin isoform Iso 1 \Gname=DBN1 \NcbiTaxId=9606
nxp:NX_Q86VP6-2	1062	0	117795.8	20	83	0.1893	Cullin-associated NEDD8-dissociated protein 1 isoform Iso 2 \Gname=CAND1 \NcbiTaxId=9606
nxp:NX_Q86YW5-1	311	17	32639.9	20	315	0.5981	Trem-like transcript 1 protein isoform Iso 1 \Gname=TREML1 \NcbiTaxId=9606
nxp:NX_Q9NTJ5-1	587	20	66906	20	270	0.3271	Phosphatidylinositide phosphatase SAC1 isoform Iso 1 \Gname=SACM1L \NcbiTaxId=9606
nxp:NX_Q9UPN3-1	7388	5	837769	20	33	0.031	Microtubule-actin cross-linking factor 1. isoforms 1/2/3/5 isoform Iso 1 \Gname=MACF1 \NcbiTaxId=9606
nxp:NX_O00139-2	660	0	74978.1	19	293	0.2379	Kinesin-like protein KIF2A isoform Iso 2 \Gname=KIF2A \NcbiTaxId=9606
nxp:NX_O00139-3	706	0	79886.6	19	293	0.2224	Kinesin-like protein KIF2A isoform Iso 3 \Gname=KIF2A \NcbiTaxId=9606
nxp:NX_O00139-4	744	0	84018.6	19	293	0.211	Kinesin-like protein KIF2A isoform Iso 4 \Gname=KIF2A \NcbiTaxId=9606
nxp:NX_O00139-5	686	0	77682.4	19	293	0.2289	Kinesin-like protein KIF2A isoform Iso 1 \Gname=KIF2A \NcbiTaxId=9606
nxp:NX_O95870-1	558	17	63185.1	19	141	0.3011	Abhydrolase domain-containing protein 16A isoform Iso 1 \Gname=ABHD16A \NcbiTaxId=9606
nxp:NX_P02776-1	101	19	10819.9	19	875	0.5644	Platelet factor 4 isoform Iso 1 \Gname=PF4 \NcbiTaxId=9606
nxp:NX_P04899-2	339	0	38429.8	19	252	0.4661	Guanine nucleotide-binding protein G(i) subunit alpha-2 isoform Iso 2 \Gname=GNA12 \NcbiTaxId=9606
nxp:NX_P04899-3	318	0	36424	19	252	0.4969	Guanine nucleotide-binding protein G(i) subunit alpha-2 isoform Iso 3 \Gname=GNA12 \NcbiTaxId=9606
nxp:NX_P05534-1	365	8	40645	19	173	0.4247	HLA class I histocompatibility antigen. A-24 alpha chain isoform Iso 1 \Gname=HLA-A \NcbiTaxId=9606
nxp:NX_P06744-2	569	0	64265.9	19	347	0.3761	Glucose-6-phosphate isomerase isoform Iso 2 \Gname=GPI \NcbiTaxId=9606
nxp:NX_P07225-1	676	19	75055.9	19	327	0.2973	Vitamin K-dependent protein S isoform Iso 1 \Gname=PROS1 \NcbiTaxId=9606
nxp:NX_P10909-2	501	0	57777.6	19	285	0.3313	Clusterin isoform Iso 2 \Gname=CLU \NcbiTaxId=9606
nxp:NX_P10909-5	460	0	53590.5	19	285	0.3609	Clusterin isoform Iso 3 \Gname=CLU \NcbiTaxId=9606
nxp:NX_P19971-1	482	0	49906.2	19	252	0.3983	Thymidine phosphorylase isoform Iso 1 \Gname=TYMP \NcbiTaxId=9606
nxp:NX_P19971-2	487	0	50355.4	19	252	0.3943	Thymidine phosphorylase isoform Iso 2 \Gname=TYMP \NcbiTaxId=9606
nxp:NX_P41226-1	1012	0	111606.1	19	170	0.2332	Ubiquitin-like modifier-activating enzyme 7 isoform Iso 1 \Gname=UBA7 \NcbiTaxId=9606
nxp:NX_P48643-1	541	18	59614.8	19	269	0.3198	T-complex protein 1 subunit epsilon isoform Iso 1 \Gname=CCT5 \NcbiTaxId=9606
nxp:NX_P51149-1	207	19	23456.8	19	317	0.686	Ras-related protein Rab-7a isoform Iso 1 \Gname=RAB7A \NcbiTaxId=9606
nxp:NX_P52907-1	286	11	32884.3	19	340	0.507	F-actin-capping protein subunit alpha-1 isoform Iso 1 \Gname=CAPZA1 \NcbiTaxId=9606
nxp:NX_P60953-2	191	16	21227	19	333	0.6649	Cell division control protein 42 homolog isoform Iso 2 \Gname=CDC42 \NcbiTaxId=9606
nxp:NX_Q01082-2	2168	0	252915.9	19	61	0.1158	Spectrin beta chain. non-erythrocytic 1 isoform Short \Gname=SPTBN1 \NcbiTaxId=9606
nxp:NX_Q01082-3	2155	0	251223.2	19	61	0.1165	Spectrin beta chain. non-erythrocytic 1 isoform Iso 2 \Gname=SPTBN1 \NcbiTaxId=9606
nxp:NX_Q07960-1	439	19	50386.2	19	335	0.4214	Rho GTPase-activating protein 1 isoform Iso 1 \Gname=ARHGAP1 \NcbiTaxId=9606
nxp:NX_Q10567-1	949	0	104552.1	19	203	0.1834	AP-1 complex subunit beta-1 isoform A \Gname=AP1B1 \NcbiTaxId=9606
nxp:NX_Q10567-2	942	0	103836.8	19	203	0.1847	AP-1 complex subunit beta-1 isoform B \Gname=AP1B1 \NcbiTaxId=9606
nxp:NX_Q13094-1	533	19	60133.1	19	167	0.3283	Lymphocyte cytosolic protein 2 isoform Iso 1 \Gname=LCP2 \NcbiTaxId=9606
nxp:NX_Q15746-3	1863	0	204912.2	19	220	0.1369	Myosin light chain kinase. smooth muscle isoform 3A \Gname=MYLK \NcbiTaxId=9606
nxp:NX_Q15746-4	1794	0	197257.4	19	220	0.1421	Myosin light chain kinase. smooth muscle isoform 3B \Gname=MYLK \NcbiTaxId=9606
nxp:NX_Q15746-6	1913	1	210435.7	19	196	0.1302	Myosin light chain kinase. smooth muscle isoform Del-1790 \Gname=MYLK \NcbiTaxId=9606
nxp:NX_Q5JSH3-4	824	0	91197.7	19	46	0.2257	WD repeat-containing protein 44 isoform Iso 4 \Gname=WDR44 \NcbiTaxId=9606
nxp:NX_Q99719-1	369	14	42731.7	19	183	0.4309	Septin-5 isoform Iso 1 \Gname=SEPT5 \NcbiTaxId=9606
nxp:NX_Q9C0C9-1	1292	19	141187	19	212	0.195	Ubiquitin-conjugating enzyme E2 O isoform Iso 1 \Gname=UBE2O \NcbiTaxId=9606
nxp:NX_Q9HBI1-1	364	0	41670.1	19	438	0.3819	Beta-parvin isoform Iso 1 \Gname=PARVB \NcbiTaxId=9606
nxp:NX_Q9HBI1-2	397	0	45136.4	19	438	0.3501	Beta-parvin isoform Iso 2 \Gname=PARVB \NcbiTaxId=9606
nxp:NX_Q9HBI1-3	327	0	37496.7	19	438	0.4251	Beta-parvin isoform Iso 3 \Gname=PARVB \NcbiTaxId=9606
nxp:NX_Q9NQC3-2	373	15	40274.9	19	507	0.5282	Reticulon-4 isoform Iso 2 \Gname=RTN4 \NcbiTaxId=9606
nxp:NX_Q9Y2Q0-3	1149	9	129621.9	19	175	0.1854	Probable phospholipid-transporting ATPase IA isoform Iso 3 \Gname=ATP8A1 \NcbiTaxId=9606
nxp:NX_O14672-1	748	18	84069.7	18	185	0.266	Disintegrin and metalloproteinase domain-containing protein 10 isoform Iso 1 \Gname=ADAM10 \NcbiTaxId=9606
nxp:NX_O43294-1	461	18	49763.8	18	304	0.5249	Transforming growth factor beta-1-induced transcript 1 protein isoform Iso 2 \Gname=TGFB1I1 \NcbiTaxId=9606
nxp:NX_O95866-2	237	16	24969.1	18	365	0.5105	Protein G6b isoform A \Gname=G6B \NcbiTaxId=9606
nxp:NX_P01137-1	390	18	44294.8	18	267	0.4026	Transforming growth factor beta-1 isoform Iso 1 \Gname=TGFB1 \NcbiTaxId=9606
nxp:NX_P01857-1	330	13	36065.2	18	295	0.4879	Ig gamma-1 chain C region isoform Iso 1 \Gname=IGHG1 \NcbiTaxId=9606
nxp:NX_P05771-2	673	16	76944.2	18	181	0.2526	Protein kinase C beta type isoform Beta-II \Gname=PRKCB \NcbiTaxId=9606
nxp:NX_P12236-1	298	3	32827.2	18	491	0.4228	ADP/ATP translocase 3 isoform Iso 1 \Gname=SLC25A6 \NcbiTaxId=9606
nxp:NX_P14868-1	501	18	57082	18	203	0.4052	Aspartate--tRNA ligase. cytoplasmic isoform Iso 1 \Gname=DARS \NcbiTaxId=9606
nxp:NX_P16284-6	727	0	81308.3	18	110	0.2889	Platelet endothelial cell adhesion molecule isoform Delta15 \Gname=PECAM1 \NcbiTaxId=9606
nxp:NX_P23284-1	216	17	23709.5	18	399	0.5231	Peptidyl-prolyl cis-trans isomerase B isoform Iso 1 \Gname=PPIB \NcbiTaxId=9606
nxp:NX_P28838-1	519	18	56112.8	18	133	0.3757	Cytosol aminopeptidase isoform Iso 2 \Gname=LAP3 \NcbiTaxId=9606
nxp:NX_P34931-1	641	1	70313.3	18	403	0.2309	Heat shock 70 kDa protein 1-like isoform Iso 1 \Gname=HSPA1L \NcbiTaxId=9606
nxp:NX_P40939-1	763	18	82928.9	18	239	0.3119	Trifunctional enzyme subunit alpha. mitochondrial isoform Iso 1 \Gname=HADHA \NcbiTaxId=9606
nxp:NX_P61224-2	137	0	15327.9	18	36	0.5547	Ras-related protein Rap-1b isoform Iso 2 \Gname=RAP1B \NcbiTaxId=9606
nxp:NX_P61981-1	247	6	28266.9	18	614	0.3927	14-3-3 protein gamma isoform Iso 1 \Gname=YWHAG \NcbiTaxId=9606
nxp:NX_Q05655-1	676	0	77436.9	18	143	0.2707	Protein kinase C delta type isoform Iso 1 \Gname=PRKCD \NcbiTaxId=9606
nxp:NX_Q05655-2	707	0	80882.7	18	143	0.2588	Protein kinase C delta type isoform Iso 2 \Gname=PRKCD \NcbiTaxId=9606
nxp:NX_Q10567-3	939	0	103479.7	18	184	0.1683	AP-1 complex subunit beta-1 isoform C \Gname=AP1B1 \NcbiTaxId=9606
nxp:NX_Q13561-1	401	0	44185.8	18	195	0.4888	Dynactin subunit 2 isoform Iso 1 \Gname=DCTN2 \NcbiTaxId=9606
nxp:NX_Q13561-2	406	0	44774.1	18	195	0.4828	Dynactin subunit 2 isoform Iso 2 \Gname=DCTN2 \NcbiTaxId=9606
nxp:NX_Q13561-3	403	0	44428	18	195	0.4864	Dynactin subunit 2 isoform Iso 3 \Gname=DCTN2 \NcbiTaxId=9606
nxp:NX_Q14019-1	142	18	15917	18	183	0.6549	Coactosin-like protein isoform Iso 1 \Gname=COTL1 \NcbiTaxId=9606
nxp:NX_Q14112-1	1375	0	151140.3	18	51	0.1884	Nidogen-2 isoform Iso 1 \Gname=NID2 \NcbiTaxId=9606
nxp:NX_Q14112-2	1274	0	140759.4	18	51	0.2033	Nidogen-2 isoform Iso 2 \Gname=NID2 \NcbiTaxId=9606
nxp:NX_Q16181-1	437	0	50630	18	349	0.3707	Septin-7 isoform Iso 1 \Gname=SEPT7 \NcbiTaxId=9606
nxp:NX_Q16181-2	436	0	50530.9	18	349	0.3716	Septin-7 isoform Iso 2 \Gname=SEPT7 \NcbiTaxId=9606
nxp:NX_Q16851-1	508	18	56886.7	18	350	0.378	UTP--glucose-1-phosphate uridylyltransferase isoform Iso 2 \Gname=UGP2 \NcbiTaxId=9606
nxp:NX_Q7LDG7-2	671	18	75481.4	18	205	0.2563	RAS guanyl-releasing protein 2 isoform Iso 1 \Gname=RASGRP2 \NcbiTaxId=9606
nxp:NX_Q8TF42-1	649	18	72631.4	18	178	0.3236	Ubiquitin-associated and SH3 domain-containing protein B isoform Iso 1 \Gname=UBASH3B \NcbiTaxId=9606
nxp:NX_Q99439-1	309	18	33657.3	18	279	0.4304	Calponin-2 isoform Iso 1 \Gname=CNN2 \NcbiTaxId=9606
nxp:NX_Q99685-1	303	3	33222.2	18	243	0.4851	Monoglyceride lipase isoform Iso 1 \Gname=MGLL \NcbiTaxId=9606
nxp:NX_Q99719-2	346	11	39289.3	18	138	0.3671	Septin-5 isoform Iso 2 \Gname=SEPT5 \NcbiTaxId=9606
nxp:NX_Q9Y251-1	543	0	61092.1	18	341	0.2707	Heparanase isoform Iso 1 \Gname=HPSE \NcbiTaxId=9606
nxp:NX_Q9Y251-2	485	0	54681	18	341	0.3031	Heparanase isoform Iso 2 \Gname=HPSE \NcbiTaxId=9606
nxp:NX_Q9Y2Q0-1	1164	0	131267.5	18	140	0.1744	Probable phospholipid-transporting ATPase IA isoform Iso 1 \Gname=ATP8A1 \NcbiTaxId=9606
nxp:NX_Q9Y2Q0-2	1149	0	129526.8	18	140	0.1767	Probable phospholipid-transporting ATPase IA isoform Iso 2 \Gname=ATP8A1 \NcbiTaxId=9606
nxp:NX_O43182-1	974	15	105864.3	17	122	0.1817	Rho GTPase-activating protein 6 isoform Iso 4 \Gname=ARHGAP6 \NcbiTaxId=9606
nxp:NX_P00747-1	810	17	90492.1	17	174	0.2951	Plasminogen isoform Iso 1 \Gname=PLG \NcbiTaxId=9606
nxp:NX_P02787-1	698	17	76995.6	17	183	0.288	Serotransferrin isoform Iso 1 \Gname=TF \NcbiTaxId=9606
nxp:NX_P04114-1	4563	17	515264.9	17	46	0.0436	Apolipoprotein B-100 isoform Iso 1 \Gname=APOB \NcbiTaxId=9606
nxp:NX_P15153-1	192	7	21397.1	17	282	0.6198	Ras-related C3 botulinum toxin substrate 2 isoform Iso 1 \Gname=RAC2 \NcbiTaxId=9606
nxp:NX_P30405-1	207	17	22008.2	17	176	0.5266	Peptidyl-prolyl cis-trans isomerase F. mitochondrial isoform Iso 1 \Gname=PPIF \NcbiTaxId=9606
nxp:NX_P42566-1	896	17	98576.8	17	147	0.1853	Epidermal growth factor receptor substrate 15 isoform Iso 1 \Gname=EPS15 \NcbiTaxId=9606
nxp:NX_P55209-1	391	13	45327.9	17	249	0.266	Nucleosome assembly protein 1-like 1 isoform Iso 1 \Gname=NAP1L1 \NcbiTaxId=9606
nxp:NX_P63000-1	192	5	21418.2	17	317	0.6823	Ras-related C3 botulinum toxin substrate 1 isoform A \Gname=RAC1 \NcbiTaxId=9606
nxp:NX_Q01433-1	879	17	100605.9	17	214	0.1775	AMP deaminase 2 isoform Ex1B-2-3 \Gname=AMPD2 \NcbiTaxId=9606
nxp:NX_Q10567-4	919	0	101265.5	17	168	0.161	AP-1 complex subunit beta-1 isoform Iso 4 \Gname=AP1B1 \NcbiTaxId=9606
nxp:NX_Q14203-1	1278	0	141589.1	17	105	0.1518	Dynactin subunit 1 isoform p150 \Gname=DCTN1 \NcbiTaxId=9606
nxp:NX_Q14203-2	1144	0	127306.6	17	105	0.1696	Dynactin subunit 1 isoform p135 \Gname=DCTN1 \NcbiTaxId=9606
nxp:NX_Q14203-4	1253	0	138646.4	17	105	0.1548	Dynactin subunit 1 isoform Iso 3 \Gname=DCTN1 \NcbiTaxId=9606
nxp:NX_Q14203-5	1139	0	126636.3	17	105	0.1703	Dynactin subunit 1 isoform Iso 5 \Gname=DCTN1 \NcbiTaxId=9606
nxp:NX_Q14203-6	1271	0	140781.5	17	105	0.1526	Dynactin subunit 1 isoform Iso 6 \Gname=DCTN1 \NcbiTaxId=9606
nxp:NX_Q14677-1	625	0	68197.8	17	181	0.2272	Clathrin interactor 1 isoform Iso 1 \Gname=CLINT1 \NcbiTaxId=9606
nxp:NX_Q14677-3	643	0	70231.9	17	181	0.2208	Clathrin interactor 1 isoform Iso 2 \Gname=CLINT1 \NcbiTaxId=9606
nxp:NX_Q15555-4	274	0	30654.1	17	295	0.3905	Microtubule-associated protein RP/EB family member 2 isoform Iso 4 \Gname=MAPRE2 \NcbiTaxId=9606
nxp:NX_Q16555-1	572	17	62236.6	17	188	0.3164	Dihydropyrimidinase-related protein 2 isoform Iso 2 \Gname=DPYSL2 \NcbiTaxId=9606
nxp:NX_Q99685-2	283	0	31110.7	17	240	0.4735	Monoglyceride lipase isoform Iso 2 \Gname=MGLL \NcbiTaxId=9606
nxp:NX_Q9NQC3-1	1192	0	129833.2	17	337	0.1602	Reticulon-4 isoform Iso 6 \Gname=RTN4 \NcbiTaxId=9606
nxp:NX_Q9NQC3-5	392	0	42229.9	17	337	0.4872	Reticulon-4 isoform Iso 5 \Gname=RTN4 \NcbiTaxId=9606
nxp:NX_Q9NYL9-1	352	17	39552.3	17	142	0.3949	Tropomodulin-3 isoform Iso 1 \Gname=TMOD3 \NcbiTaxId=9606
nxp:NX_Q9UJU6-2	431	1	48246.6	17	116	0.4478	Drebrin-like protein isoform Iso 2 \Gname=DBNL \NcbiTaxId=9606
nxp:NX_Q9ULH1-1	1129	0	125402.3	17	102	0.1825	Arf-GAP with SH3 domain. ANK repeat and PH domain-containing protein 1 isoform Iso 2 \Gname=ASAP1 \NcbiTaxId=9606
nxp:NX_Q9ULH1-2	1132	0	125801.6	17	102	0.182	Arf-GAP with SH3 domain. ANK repeat and PH domain-containing protein 1 isoform Iso 1 \Gname=ASAP1 \NcbiTaxId=9606
nxp:NX_Q9Y6E0-1	443	0	49259.3	17	245	0.3251	Serine/threonine-protein kinase 24 isoform B \Gname=STK24 \NcbiTaxId=9606
nxp:NX_Q9Y6E0-2	431	0	47865.5	17	245	0.3341	Serine/threonine-protein kinase 24 isoform A \Gname=STK24 \NcbiTaxId=9606
nxp:NX_O14745-1	358	16	38826.6	16	171	0.4637	Na(+)/H(+) exchange regulatory cofactor NHE-RF1 isoform Iso 1 \Gname=SLC9A3R1 \NcbiTaxId=9606
nxp:NX_O75563-1	359	16	41172.9	16	208	0.3231	Src kinase-associated phosphoprotein 2 isoform Iso 1 \Gname=SKAP2 \NcbiTaxId=9606
nxp:NX_O95782-1	977	0	107459.7	16	194	0.1781	AP-2 complex subunit alpha-1 isoform A \Gname=AP2A1 \NcbiTaxId=9606
nxp:NX_O95782-2	955	0	105276.7	16	194	0.1822	AP-2 complex subunit alpha-1 isoform B \Gname=AP2A1 \NcbiTaxId=9606
nxp:NX_P09493-5	245	3	28350.5	16	179	0.2571	Tropomyosin alpha-1 chain isoform Iso 5 \Gname=TPM1 \NcbiTaxId=9606
nxp:NX_P16284-4	719	0	80349.7	16	91	0.2545	Platelet endothelial cell adhesion molecule isoform Delta14 \Gname=PECAM1 \NcbiTaxId=9606
nxp:NX_P16284-5	708	0	79192.2	16	91	0.2585	Platelet endothelial cell adhesion molecule isoform Delta14-15 \Gname=PECAM1 \NcbiTaxId=9606
nxp:NX_P17858-1	780	7	84946.1	16	118	0.2192	6-phosphofructokinase. liver type isoform Iso 1 \Gname=PFKL \NcbiTaxId=9606
nxp:NX_P22392-2	267	8	30099.6	16	412	0.4457	Nucleoside diphosphate kinase B isoform Iso 1 \Gname=NME2 \NcbiTaxId=9606
nxp:NX_P23368-1	584	14	65383.8	16	231	0.3425	NAD-dependent malic enzyme. mitochondrial isoform Iso 1 \Gname=ME2 \NcbiTaxId=9606
nxp:NX_P26639-1	723	12	83363.9	16	175	0.2462	Threonine--tRNA ligase. cytoplasmic isoform Iso 1 \Gname=TARS \NcbiTaxId=9606
nxp:NX_P30153-1	589	16	65248.9	16	191	0.2649	Serine/threonine-protein phosphatase 2A 65 kDa regulatory subunit A alpha isoform isoform Iso 1 \Gname=PPP2R1A \NcbiTaxId=9606
nxp:NX_P30493-1	362	0	40453	16	122	0.3398	HLA class I histocompatibility antigen. B-55 alpha chain isoform Iso 1 \Gname=HLA-B \NcbiTaxId=9606
nxp:NX_P34932-1	840	16	94253.2	16	196	0.2357	Heat shock 70 kDa protein 4 isoform Iso 1 \Gname=HSPA4 \NcbiTaxId=9606
nxp:NX_P37840-1	140	0	14433.2	16	584	0.5571	Alpha-synuclein isoform Iso 1 \Gname=SNCA \NcbiTaxId=9606
nxp:NX_P37840-2	112	0	11346.9	16	584	0.6964	Alpha-synuclein isoform 2-4 \Gname=SNCA \NcbiTaxId=9606
nxp:NX_P49411-1	452	16	49492.2	16	236	0.4159	Elongation factor Tu. mitochondrial isoform Iso 1 \Gname=TUFM \NcbiTaxId=9606
nxp:NX_P49748-2	633	0	67997.1	16	106	0.3239	Very long-chain specific acyl-CoA dehydrogenase. mitochondrial isoform Iso 2 \Gname=ACADVL \NcbiTaxId=9606
nxp:NX_P51692-1	787	15	89791.6	16	159	0.2122	Signal transducer and activator of transcription 5B isoform Iso 1 \Gname=STAT5B \NcbiTaxId=9606
nxp:NX_P54920-1	295	16	33193.3	16	231	0.5186	Alpha-soluble NSF attachment protein isoform Iso 1 \Gname=NAPA \NcbiTaxId=9606
nxp:NX_P60660-1	151	0	16901.1	16	362	0.4768	Myosin light polypeptide 6 isoform Non-muscle \Gname=MYL6 \NcbiTaxId=9606
nxp:NX_P62136-1	330	10	37469.8	16	260	0.4576	Serine/threonine-protein phosphatase PP1-alpha catalytic subunit isoform Iso 1 \Gname=PPP1CA \NcbiTaxId=9606
nxp:NX_Q15746-5	1841	0	202205.3	16	73	0.1217	Myosin light chain kinase. smooth muscle isoform Iso 4 \Gname=MYLK \NcbiTaxId=9606
nxp:NX_Q16643-2	651	0	71536.5	16	81	0.3149	Drebrin isoform Iso 2 \Gname=DBN1 \NcbiTaxId=9606
nxp:NX_Q29940-1	362	0	40541.1	16	122	0.3398	HLA class I histocompatibility antigen. B-59 alpha chain isoform Iso 1 \Gname=HLA-B \NcbiTaxId=9606
nxp:NX_Q8NBF2-1	726	16	79375.4	16	120	0.241	NHL repeat-containing protein 2 isoform Iso 2 \Gname=NHLRC2 \NcbiTaxId=9606
nxp:NX_Q96HC4-1	596	15	63886.5	16	233	0.3456	PDZ and LIM domain protein 5 isoform Iso 1 \Gname=PDLIM5 \NcbiTaxId=9606
nxp:NX_Q9HCN6-1	339	0	36824.9	16	194	0.3392	Platelet glycoprotein VI isoform Iso 1 \Gname=GP6 \NcbiTaxId=9606
nxp:NX_Q9HCN6-2	321	0	35051	16	194	0.3583	Platelet glycoprotein VI isoform Iso 2 \Gname=GP6 \NcbiTaxId=9606
nxp:NX_Q9NZ08-1	941	0	107148.2	16	100	0.1828	Endoplasmic reticulum aminopeptidase 1 isoform Iso 1 \Gname=ERAP1 \NcbiTaxId=9606
nxp:NX_Q9NZ08-2	948	0	107754.5	16	100	0.1814	Endoplasmic reticulum aminopeptidase 1 isoform Iso 2 \Gname=ERAP1 \NcbiTaxId=9606
nxp:NX_A6NKZ8-1	372	1	41730.1	15	110	0.2258	Putative tubulin beta chain-like protein ENSP00000290377 isoform Iso 1 \Gname=null \NcbiTaxId=9606
nxp:NX_O00161-1	211	15	23321.5	15	220	0.5071	Synaptosomal-associated protein 23 isoform SNAP-23a \Gname=SNAP23 \NcbiTaxId=9606
nxp:NX_O43150-1	1006	10	111562.6	15	91	0.1909	Arf-GAP with SH3 domain. ANK repeat and PH domain-containing protein 2 isoform Iso 1 \Gname=ASAP2 \NcbiTaxId=9606
nxp:NX_P01009-1	418	13	46689	15	130	0.3254	Alpha-1-antitrypsin isoform Iso 1 \Gname=SERPINA1 \NcbiTaxId=9606
nxp:NX_P01891-1	365	4	40865.1	15	44	0.4301	HLA class I histocompatibility antigen. A-68 alpha chain isoform Iso 1 \Gname=HLA-A \NcbiTaxId=9606
nxp:NX_P05067-1	770	0	86870	15	212	0.2026	Amyloid beta A4 protein isoform APP770 \Gname=APP \NcbiTaxId=9606
nxp:NX_P05067-11	746	0	84449.6	15	212	0.2091	Amyloid beta A4 protein isoform Iso 11 \Gname=APP \NcbiTaxId=9606
nxp:NX_P05067-8	751	0	84746.9	15	212	0.2077	Amyloid beta A4 protein isoform APP751 \Gname=APP \NcbiTaxId=9606
nxp:NX_P06241-1	537	0	60705.4	15	200	0.257	Tyrosine-protein kinase Fyn isoform Iso 1 \Gname=FYN \NcbiTaxId=9606
nxp:NX_P06241-2	534	0	60084.9	15	200	0.2584	Tyrosine-protein kinase Fyn isoform Iso 2 \Gname=FYN \NcbiTaxId=9606
nxp:NX_P06241-3	482	0	54461.1	15	200	0.2863	Tyrosine-protein kinase Fyn isoform Iso 3 \Gname=FYN \NcbiTaxId=9606
nxp:NX_P07947-1	543	3	60744.5	15	191	0.2449	Tyrosine-protein kinase Yes isoform Iso 1 \Gname=YES1 \NcbiTaxId=9606
nxp:NX_P15170-2	636	0	68539.1	15	115	0.2453	Eukaryotic peptide chain release factor GTP-binding subunit ERF3A isoform Iso 2 \Gname=GSPT1 \NcbiTaxId=9606
nxp:NX_P15170-3	637	0	68638.1	15	115	0.2449	Eukaryotic peptide chain release factor GTP-binding subunit ERF3A isoform Iso 1 \Gname=GSPT1 \NcbiTaxId=9606
nxp:NX_P16188-1	365	3	40861.2	15	89	0.4247	HLA class I histocompatibility antigen. A-30 alpha chain isoform Iso 1 \Gname=HLA-A \NcbiTaxId=9606
nxp:NX_P23219-3	537	0	61871.1	15	72	0.2272	Prostaglandin G/H synthase 1 isoform Iso 3 \Gname=PTGS1 \NcbiTaxId=9606
nxp:NX_P30491-1	362	0	40452.2	15	125	0.3536	HLA class I histocompatibility antigen. B-53 alpha chain isoform Iso 1 \Gname=HLA-B \NcbiTaxId=9606
nxp:NX_P30685-1	362	0	40412.1	15	125	0.3536	HLA class I histocompatibility antigen. B-35 alpha chain isoform Iso 1 \Gname=HLA-B \NcbiTaxId=9606
nxp:NX_P35241-4	447	0	52628	15	227	0.2595	Radixin isoform Iso 4 \Gname=RDX \NcbiTaxId=9606
nxp:NX_P40227-1	531	14	57969.6	15	176	0.2354	T-complex protein 1 subunit zeta isoform Iso 1 \Gname=CCT6A \NcbiTaxId=9606
nxp:NX_P43405-1	635	0	72002.3	15	121	0.2756	Tyrosine-protein kinase SYK isoform Long \Gname=SYK \NcbiTaxId=9606
nxp:NX_P43405-2	612	0	69447.9	15	121	0.2859	Tyrosine-protein kinase SYK isoform Short \Gname=SYK \NcbiTaxId=9606
nxp:NX_P50991-1	539	8	57869.8	15	286	0.295	T-complex protein 1 subunit delta isoform Iso 1 \Gname=CCT4 \NcbiTaxId=9606
nxp:NX_P55084-1	474	15	51243.5	15	204	0.3017	Trifunctional enzyme subunit beta. mitochondrial isoform Iso 1 \Gname=HADHB \NcbiTaxId=9606
nxp:NX_P58546-1	118	15	12868.6	15	189	0.7373	Myotrophin isoform Iso 1 \Gname=MTPN \NcbiTaxId=9606
nxp:NX_P62136-2	341	0	38588.4	15	208	0.4106	Serine/threonine-protein phosphatase PP1-alpha catalytic subunit isoform Iso 2 \Gname=PPP1CA \NcbiTaxId=9606
nxp:NX_P62158-1	149	15	16808.8	15	185	0.4161	Calmodulin isoform Iso 1 \Gname=CALM1;CALM2;CALM3 \NcbiTaxId=9606
nxp:NX_P63000-2	211	0	23434.3	15	267	0.5592	Ras-related C3 botulinum toxin substrate 1 isoform B \Gname=RAC1 \NcbiTaxId=9606
nxp:NX_P68104-1	462	0	50091.1	15	270	0.303	Elongation factor 1-alpha 1 isoform Iso 1 \Gname=EEF1A1 \NcbiTaxId=9606
nxp:NX_P78371-1	535	15	57434.1	15	233	0.3364	T-complex protein 1 subunit beta isoform Iso 2 \Gname=CCT2 \NcbiTaxId=9606
nxp:NX_Q02108-1	690	15	77384.3	15	135	0.2449	Guanylate cyclase soluble subunit alpha-3 isoform Iso 2 \Gname=GUCY1A3 \NcbiTaxId=9606
nxp:NX_Q06187-1	659	15	76214.3	15	182	0.2822	Tyrosine-protein kinase BTK isoform Iso 1 \Gname=BTK \NcbiTaxId=9606
nxp:NX_Q08495-1	405	0	45468.2	15	210	0.4074	Dematin isoform Iso 1 \Gname=DMTN \NcbiTaxId=9606
nxp:NX_Q08495-2	383	0	43043	15	210	0.4308	Dematin isoform Iso 2 \Gname=DMTN \NcbiTaxId=9606
nxp:NX_Q16891-1	758	0	83608.3	15	128	0.2441	Mitochondrial inner membrane protein isoform Iso 1 \Gname=IMMT \NcbiTaxId=9606
nxp:NX_Q16891-2	747	0	82555.8	15	128	0.2477	Mitochondrial inner membrane protein isoform Iso 2 \Gname=IMMT \NcbiTaxId=9606
nxp:NX_Q4KMQ2-1	910	0	106078.2	15	181	0.2033	Anoctamin-6 isoform Iso 1 \Gname=ANO6 \NcbiTaxId=9606
nxp:NX_Q4KMQ2-2	931	0	108344.4	15	181	0.1987	Anoctamin-6 isoform Iso 2 \Gname=ANO6 \NcbiTaxId=9606
nxp:NX_Q4KMQ2-3	892	0	103880.2	15	181	0.2074	Anoctamin-6 isoform Iso 3 \Gname=ANO6 \NcbiTaxId=9606
nxp:NX_Q4KMQ2-4	929	0	108014	15	181	0.1991	Anoctamin-6 isoform Iso 4 \Gname=ANO6 \NcbiTaxId=9606
nxp:NX_Q5VTE0-1	462	0	50135.1	15	270	0.303	Putative elongation factor 1-alpha-like 3 isoform Iso 1 \Gname=EEF1A1P5 \NcbiTaxId=9606
nxp:NX_Q6IBS0-1	349	15	39505.3	15	319	0.4986	Twinfilin-2 isoform Iso 1 \Gname=TWF2 \NcbiTaxId=9606
nxp:NX_Q8TC12-1	318	15	35345.4	15	339	0.3994	Retinol dehydrogenase 11 isoform Iso 1 \Gname=RDH11 \NcbiTaxId=9606
nxp:NX_Q99832-1	543	15	59310.9	15	278	0.2818	T-complex protein 1 subunit eta isoform Iso 3 \Gname=CCT7 \NcbiTaxId=9606
nxp:NX_Q9UJU6-3	439	0	48993.9	15	104	0.3964	Drebrin-like protein isoform Iso 3 \Gname=DBNL \NcbiTaxId=9606
nxp:NX_Q9Y678-1	874	15	97637.5	15	111	0.2059	Coatomer subunit gamma-1 isoform Iso 1 \Gname=COPG1 \NcbiTaxId=9606
nxp:NX_O60763-1	962	0	107810	14	94	0.183	General vesicular transport factor p115 isoform Iso 1 \Gname=USO1 \NcbiTaxId=9606
nxp:NX_O60763-2	973	0	109108.7	14	94	0.1809	General vesicular transport factor p115 isoform Iso 2 \Gname=USO1 \NcbiTaxId=9606
nxp:NX_O75390-1	466	14	51661.5	14	160	0.2489	Citrate synthase. mitochondrial isoform Iso 1 \Gname=CS \NcbiTaxId=9606
nxp:NX_O75947-1	161	14	18461.5	14	117	0.6335	ATP synthase subunit d. mitochondrial isoform Iso 1 \Gname=ATP5H \NcbiTaxId=9606
nxp:NX_P07203-1	203	14	22057.1	14	331	0.5172	Glutathione peroxidase 1 isoform Iso 1 \Gname=GPX1 \NcbiTaxId=9606
nxp:NX_P07948-2	491	10	55979.5	14	181	0.2668	Tyrosine-protein kinase Lyn isoform Iso 2 \Gname=LYN \NcbiTaxId=9606
nxp:NX_P13489-1	461	14	49923.1	14	192	0.3818	Ribonuclease inhibitor isoform Iso 1 \Gname=RNH1 \NcbiTaxId=9606
nxp:NX_P17066-1	643	0	70966.2	14	287	0.168	Heat shock 70 kDa protein 6 isoform Iso 1 \Gname=HSPA6 \NcbiTaxId=9606
nxp:NX_P18464-1	362	0	40523.1	14	110	0.3536	HLA class I histocompatibility antigen. B-51 alpha chain isoform Iso 1 \Gname=HLA-B \NcbiTaxId=9606
nxp:NX_P30490-1	362	0	40478	14	110	0.3536	HLA class I histocompatibility antigen. B-52 alpha chain isoform Iso 1 \Gname=HLA-B \NcbiTaxId=9606
nxp:NX_P30498-1	362	0	40435	14	110	0.3536	HLA class I histocompatibility antigen. B-78 alpha chain isoform Iso 1 \Gname=HLA-B \NcbiTaxId=9606
nxp:NX_P31930-1	480	14	52594.4	14	169	0.3438	Cytochrome b-c1 complex subunit 1. mitochondrial isoform Iso 1 \Gname=UQCRC1 \NcbiTaxId=9606
nxp:NX_P31939-1	592	14	64557.3	14	176	0.25	Bifunctional purine biosynthesis protein PURH isoform Iso 1 \Gname=ATIC \NcbiTaxId=9606
nxp:NX_P35237-1	376	14	42576	14	214	0.3351	Serpin B6 isoform Iso 1 \Gname=SERPINB6 \NcbiTaxId=9606
nxp:NX_P38606-1	617	14	68242.5	14	103	0.2577	V-type proton ATPase catalytic subunit A isoform Iso 1 \Gname=ATP6V1A \NcbiTaxId=9606
nxp:NX_P41250-1	739	14	83094.6	14	86	0.226	Glycine--tRNA ligase isoform Iso 1 \Gname=GARS \NcbiTaxId=9606
nxp:NX_P42229-1	794	8	90572.3	14	72	0.1612	Signal transducer and activator of transcription 5A isoform Iso 1 \Gname=STAT5A \NcbiTaxId=9606
nxp:NX_P50570-1	870	0	97985.2	14	100	0.1575	Dynamin-2 isoform Iso 1 \Gname=DNM2 \NcbiTaxId=9606
nxp:NX_P50570-2	866	0	97572.9	14	100	0.1582	Dynamin-2 isoform Iso 2 \Gname=DNM2 \NcbiTaxId=9606
nxp:NX_P50570-5	869	0	97898.1	14	100	0.1577	Dynamin-2 isoform Iso 5 \Gname=DNM2 \NcbiTaxId=9606
nxp:NX_P50991-2	509	0	54667.1	14	251	0.2849	T-complex protein 1 subunit delta isoform Iso 2 \Gname=CCT4 \NcbiTaxId=9606
nxp:NX_P53618-1	953	14	107055.7	14	234	0.1952	Coatomer subunit beta isoform Iso 1 \Gname=COPB1 \NcbiTaxId=9606
nxp:NX_P61204-1	181	0	20569.7	14	350	0.5193	ADP-ribosylation factor 3 isoform Iso 1 \Gname=ARF3 \NcbiTaxId=9606
nxp:NX_P62993-1	217	14	25172.4	14	204	0.4977	Growth factor receptor-bound protein 2 isoform Iso 1 \Gname=GRB2 \NcbiTaxId=9606
nxp:NX_P84077-1	181	0	20665.7	14	350	0.5193	ADP-ribosylation factor 1 isoform Iso 1 \Gname=ARF1 \NcbiTaxId=9606
nxp:NX_Q06323-1	249	7	28687	14	204	0.49	Proteasome activator complex subunit 1 isoform Iso 1 \Gname=PSME1 \NcbiTaxId=9606
nxp:NX_Q13637-1	225	14	24963.7	14	160	0.6267	Ras-related protein Rab-32 isoform Iso 1 \Gname=RAB32 \NcbiTaxId=9606
nxp:NX_Q14344-1	377	13	44003.7	14	162	0.4164	Guanine nucleotide-binding protein subunit alpha-13 isoform Iso 1 \Gname=GNA13 \NcbiTaxId=9606
nxp:NX_Q14974-1	876	14	97090	14	179	0.1735	Importin subunit beta-1 isoform Iso 1 \Gname=KPNB1 \NcbiTaxId=9606
nxp:NX_Q15907-1	218	13	24455.5	14	357	0.5734	Ras-related protein Rab-11B isoform Iso 1 \Gname=RAB11B \NcbiTaxId=9606
nxp:NX_Q3ZCW2-1	172	14	18955.6	14	314	0.6395	Galectin-related protein isoform Iso 1 \Gname=LGALSL \NcbiTaxId=9606
nxp:NX_Q6PEY2-1	450	0	49808.6	14	30	0.2667	Tubulin alpha-3E chain isoform Iso 1 \Gname=TUBA3E \NcbiTaxId=9606
nxp:NX_Q8NBS9-1	432	14	47580.7	14	114	0.3148	Thioredoxin domain-containing protein 5 isoform Iso 2 \Gname=TXNDC5 \NcbiTaxId=9606
nxp:NX_Q9H939-1	334	12	38815.6	14	137	0.3204	Proline-serine-threonine phosphatase-interacting protein 2 isoform Iso 1 \Gname=PSTPIP2 \NcbiTaxId=9606
nxp:NX_Q9NQC3-3	199	1	22363.2	14	278	0.3668	Reticulon-4 isoform Iso 3 \Gname=RTN4 \NcbiTaxId=9606
nxp:NX_Q9NXH8-1	423	14	46866.9	14	140	0.3381	Torsin-4A isoform Iso 1 \Gname=TOR4A \NcbiTaxId=9606
nxp:NX_Q9UDY2-6	1157	0	130348.6	14	55	0.14	Tight junction protein ZO-2 isoform Iso 6 \Gname=TJP2 \NcbiTaxId=9606
nxp:NX_Q9UPN3-5	5938	0	669703.4	14	22	0.0271	Microtubule-actin cross-linking factor 1. isoforms 1/2/3/5 isoform Iso 4 \Gname=MACF1 \NcbiTaxId=9606
nxp:NX_Q9Y696-1	253	12	28735.7	14	210	0.5296	Chloride intracellular channel protein 4 isoform Iso 1 \Gname=CLIC4 \NcbiTaxId=9606
nxp:NX_O00410-3	1115	13	125445.8	13	51	0.1274	Importin-5 isoform Iso 2 \Gname=IPO5 \NcbiTaxId=9606
nxp:NX_O15117-1	783	0	85317.1	13	32	0.2107	FYN-binding protein isoform FYB-120 \Gname=FYB \NcbiTaxId=9606
nxp:NX_O43488-1	359	13	39545.7	13	151	0.3844	Aflatoxin B1 aldehyde reductase member 2 isoform Iso 1 \Gname=AKR7A2 \NcbiTaxId=9606
nxp:NX_O75558-1	287	13	33156.8	13	202	0.3902	Syntaxin-11 isoform Iso 1 \Gname=STX11 \NcbiTaxId=9606
nxp:NX_P00338-4	274	0	30167.8	13	102	0.2774	L-lactate dehydrogenase A chain isoform Iso 4 \Gname=LDHA \NcbiTaxId=9606
nxp:NX_P00918-1	260	13	29209.9	13	280	0.4577	Carbonic anhydrase 2 isoform Iso 1 \Gname=CA2 \NcbiTaxId=9606
nxp:NX_P01860-1	377	3	41242.4	13	129	0.3369	Ig gamma-3 chain C region isoform Iso 1 \Gname=IGHG3 \NcbiTaxId=9606
nxp:NX_P04632-1	268	13	28279.7	13	166	0.3246	Calpain small subunit 1 isoform Iso 1 \Gname=CAPNS1 \NcbiTaxId=9606
nxp:NX_P05067-7	733	0	82844.9	13	199	0.1801	Amyloid beta A4 protein isoform L-APP733 \Gname=APP \NcbiTaxId=9606
nxp:NX_P05067-9	752	0	84968	13	199	0.1755	Amyloid beta A4 protein isoform L-APP752 \Gname=APP \NcbiTaxId=9606
nxp:NX_P11234-1	206	13	23375.9	13	173	0.3544	Ras-related protein Ral-B isoform Iso 1 \Gname=RALB \NcbiTaxId=9606
nxp:NX_P11586-1	935	13	101477.3	13	130	0.154	C-1-tetrahydrofolate synthase. cytoplasmic isoform Iso 1 \Gname=MTHFD1 \NcbiTaxId=9606
nxp:NX_P11766-1	374	13	39680.4	13	149	0.4171	Alcohol dehydrogenase class-3 isoform Iso 1 \Gname=ADH5 \NcbiTaxId=9606
nxp:NX_P19086-1	355	11	40879.9	13	221	0.431	Guanine nucleotide-binding protein G(z) subunit alpha isoform Iso 1 \Gname=GNAZ \NcbiTaxId=9606
nxp:NX_P22694-2	398	12	46188.7	13	174	0.3266	cAMP-dependent protein kinase catalytic subunit beta isoform Iso 2 \Gname=PRKACB \NcbiTaxId=9606
nxp:NX_P27338-1	520	13	58707.1	13	155	0.2654	Amine oxidase [flavin-containing] B isoform Iso 1 \Gname=MAOB \NcbiTaxId=9606
nxp:NX_P30462-1	362	0	40314.9	13	73	0.337	HLA class I histocompatibility antigen. B-14 alpha chain isoform Iso 1 \Gname=HLA-B \NcbiTaxId=9606
nxp:NX_P32119-1	198	11	21860.2	13	200	0.5859	Peroxiredoxin-2 isoform Iso 1 \Gname=PRDX2 \NcbiTaxId=9606
nxp:NX_P35611-1	737	0	80886.7	13	141	0.2307	Alpha-adducin isoform Iso 1 \Gname=ADD1 \NcbiTaxId=9606
nxp:NX_P35611-2	631	0	69923.3	13	141	0.2694	Alpha-adducin isoform Iso 2 \Gname=ADD1 \NcbiTaxId=9606
nxp:NX_P35611-3	768	0	84232.4	13	141	0.2214	Alpha-adducin isoform Iso 3 \Gname=ADD1 \NcbiTaxId=9606
nxp:NX_P36871-2	580	0	63732.3	13	30	0.2655	Phosphoglucomutase-1 isoform Iso 2 \Gname=PGM1 \NcbiTaxId=9606
nxp:NX_P41240-1	450	13	50653.7	13	233	0.2978	Tyrosine-protein kinase CSK isoform Iso 1 \Gname=CSK \NcbiTaxId=9606
nxp:NX_P61026-1	200	11	22508.6	13	180	0.4	Ras-related protein Rab-10 isoform Iso 1 \Gname=RAB10 \NcbiTaxId=9606
nxp:NX_Q00325-2	361	13	39914.6	13	137	0.3102	Phosphate carrier protein. mitochondrial isoform B \Gname=SLC25A3 \NcbiTaxId=9606
nxp:NX_Q06323-2	250	0	28565.9	13	184	0.44	Proteasome activator complex subunit 1 isoform Iso 2 \Gname=PSME1 \NcbiTaxId=9606
nxp:NX_Q06830-1	199	10	22078.3	13	330	0.7085	Peroxiredoxin-1 isoform Iso 1 \Gname=PRDX1 \NcbiTaxId=9606
nxp:NX_Q13200-1	908	13	100117.8	13	62	0.174	26S proteasome non-ATPase regulatory subunit 2 isoform Iso 1 \Gname=PSMD2 \NcbiTaxId=9606
nxp:NX_Q15067-1	660	0	74358.2	13	76	0.2636	Peroxisomal acyl-coenzyme A oxidase 1 isoform Iso 1 \Gname=ACOX1 \NcbiTaxId=9606
nxp:NX_Q15067-2	660	0	74602.1	13	76	0.2636	Peroxisomal acyl-coenzyme A oxidase 1 isoform Iso 3 \Gname=ACOX1 \NcbiTaxId=9606
nxp:NX_Q16891-4	757	0	83479.3	13	109	0.1929	Mitochondrial inner membrane protein isoform Iso 4 \Gname=IMMT \NcbiTaxId=9606
nxp:NX_Q7L591-1	496	13	53236.9	13	126	0.2903	Docking protein 3 isoform Iso 1 \Gname=DOK3 \NcbiTaxId=9606
nxp:NX_Q86TP1-1	453	13	50149.9	13	92	0.298	Protein prune homolog isoform Iso 1 \Gname=PRUNE \NcbiTaxId=9606
nxp:NX_Q99714-1	261	11	26888.1	13	112	0.659	3-hydroxyacyl-CoA dehydrogenase type-2 isoform Iso 1 \Gname=HSD17B10 \NcbiTaxId=9606
nxp:NX_Q9HCN6-3	620	0	67414.7	13	151	0.1468	Platelet glycoprotein VI isoform Iso 3 \Gname=GP6 \NcbiTaxId=9606
nxp:NX_Q9NQ75-2	672	0	74522.5	13	56	0.2738	Cas scaffolding protein family member 4 isoform Iso 2 \Gname=CASS4 \NcbiTaxId=9606
nxp:NX_Q9UQ80-1	394	13	43741.2	13	80	0.3731	Proliferation-associated protein 2G4 isoform Iso 1 \Gname=PA2G4 \NcbiTaxId=9606
nxp:NX_Q9Y2A7-1	1128	0	128688.5	13	148	0.1179	Nck-associated protein 1 isoform Iso 1 \Gname=NCKAP1 \NcbiTaxId=9606
nxp:NX_Q9Y2A7-2	1134	0	129414.9	13	148	0.1173	Nck-associated protein 1 isoform Iso 2 \Gname=NCKAP1 \NcbiTaxId=9606
nxp:NX_Q9Y3F4-1	350	13	38396	13	114	0.4171	Serine-threonine kinase receptor-associated protein isoform Iso 1 \Gname=STRAP \NcbiTaxId=9606
nxp:NX_O00203-1	1094	12	121226.5	12	77	0.128	AP-3 complex subunit beta-1 isoform Iso 2 \Gname=AP3B1 \NcbiTaxId=9606
nxp:NX_O14974-1	1030	0	115193.3	12	104	0.1272	Protein phosphatase 1 regulatory subunit 12A isoform Iso 5 \Gname=PPP1R12A \NcbiTaxId=9606
nxp:NX_O14974-3	974	0	109643.6	12	104	0.1345	Protein phosphatase 1 regulatory subunit 12A isoform Iso 3 \Gname=PPP1R12A \NcbiTaxId=9606
nxp:NX_O14974-4	971	0	109020.2	12	104	0.1349	Protein phosphatase 1 regulatory subunit 12A isoform Iso 4 \Gname=PPP1R12A \NcbiTaxId=9606
nxp:NX_O43639-1	380	12	42870.5	12	152	0.3526	Cytoplasmic protein NCK2 isoform Iso 1 \Gname=NCK2 \NcbiTaxId=9606
nxp:NX_O60229-1	2985	0	339942.3	12	77	0.0462	Kalirin isoform Iso 1 \Gname=KALRN \NcbiTaxId=9606
nxp:NX_O60229-4	1289	0	144375.5	12	77	0.1071	Kalirin isoform Iso 4 \Gname=KALRN \NcbiTaxId=9606
nxp:NX_O60229-5	738	0	82735.6	12	77	0.187	Kalirin isoform Iso 5 \Gname=KALRN \NcbiTaxId=9606
nxp:NX_O60229-6	1257	0	141056.7	12	77	0.1098	Kalirin isoform Iso 6 \Gname=KALRN \NcbiTaxId=9606
nxp:NX_O75368-1	114	12	12748.4	12	259	0.8509	SH3 domain-binding glutamic acid-rich-like protein isoform Iso 1 \Gname=SH3BGRL \NcbiTaxId=9606
nxp:NX_O75874-1	414	11	46611.5	12	203	0.2536	Isocitrate dehydrogenase [NADP] cytoplasmic isoform Iso 1 \Gname=IDH1 \NcbiTaxId=9606
nxp:NX_O75955-1	427	12	47307.6	12	95	0.3091	Flotillin-1 isoform Iso 1 \Gname=FLOT1 \NcbiTaxId=9606
nxp:NX_P01892-1	365	0	40878.2	12	25	0.3452	HLA class I histocompatibility antigen. A-2 alpha chain isoform Iso 1 \Gname=HLA-A \NcbiTaxId=9606
nxp:NX_P04179-1	222	12	24688.5	12	270	0.6216	Superoxide dismutase [Mn]. mitochondrial isoform Iso 1 \Gname=SOD2 \NcbiTaxId=9606
nxp:NX_P07948-1	512	0	58518.8	12	117	0.2188	Tyrosine-protein kinase Lyn isoform Iso 1 \Gname=LYN \NcbiTaxId=9606
nxp:NX_P10619-1	480	12	54413.1	12	92	0.2292	Lysosomal protective protein isoform Iso 1 \Gname=CTSA \NcbiTaxId=9606
nxp:NX_P10644-1	381	12	42937	12	98	0.3517	cAMP-dependent protein kinase type I-alpha regulatory subunit isoform Iso 1 \Gname=PRKAR1A \NcbiTaxId=9606
nxp:NX_P11169-1	496	7	53871.2	12	208	0.123	Solute carrier family 2. facilitated glucose transporter member 3 isoform Iso 1 \Gname=SLC2A3 \NcbiTaxId=9606
nxp:NX_P13716-1	330	6	36253.4	12	210	0.3212	Delta-aminolevulinic acid dehydratase isoform Iso 1 \Gname=ALAD \NcbiTaxId=9606
nxp:NX_P16190-1	365	3	40848.2	12	47	0.3534	HLA class I histocompatibility antigen. A-33 alpha chain isoform Iso 1 \Gname=HLA-A \NcbiTaxId=9606
nxp:NX_P17858-2	827	0	90127.4	12	106	0.1632	6-phosphofructokinase. liver type isoform Iso 2 \Gname=PFKL \NcbiTaxId=9606
nxp:NX_P21796-1	283	9	30735.6	12	135	0.3675	Voltage-dependent anion-selective channel protein 1 isoform Iso 1 \Gname=VDAC1 \NcbiTaxId=9606
nxp:NX_P23526-1	432	12	47667.2	12	78	0.2708	Adenosylhomocysteinase isoform Iso 2 \Gname=AHCY \NcbiTaxId=9606
nxp:NX_P26639-2	756	0	86787.6	12	115	0.1521	Threonine--tRNA ligase. cytoplasmic isoform Iso 2 \Gname=TARS \NcbiTaxId=9606
nxp:NX_P29350-4	624	0	70069.4	12	36	0.2372	Tyrosine-protein phosphatase non-receptor type 6 isoform Iso 4 \Gname=PTPN6 \NcbiTaxId=9606
nxp:NX_P30508-1	366	0	40842.1	12	112	0.3716	HLA class I histocompatibility antigen. Cw-12 alpha chain isoform Iso 1 \Gname=HLA-C \NcbiTaxId=9606
nxp:NX_P35232-1	272	12	29767.9	12	103	0.4743	Prohibitin isoform Iso 1 \Gname=PHB \NcbiTaxId=9606
nxp:NX_P35606-1	906	12	102404.5	12	78	0.1424	Coatomer subunit beta' isoform Iso 1 \Gname=COPB2 \NcbiTaxId=9606
nxp:NX_P35749-1	1972	0	227180.9	12	24	0.0573	Myosin-11 isoform Iso 1 \Gname=MYH11 \NcbiTaxId=9606
nxp:NX_P35749-2	1979	0	227931.2	12	24	0.0571	Myosin-11 isoform Iso 2 \Gname=MYH11 \NcbiTaxId=9606
nxp:NX_P35749-3	1945	0	224171.5	12	24	0.0581	Myosin-11 isoform Iso 3 \Gname=MYH11 \NcbiTaxId=9606
nxp:NX_P35749-4	1938	0	223421.1	12	24	0.0583	Myosin-11 isoform Iso 4 \Gname=MYH11 \NcbiTaxId=9606
nxp:NX_P35813-3	455	12	51315.4	12	118	0.3319	Protein phosphatase 1A isoform Alpha-1 \Gname=PPM1A \NcbiTaxId=9606
nxp:NX_P37837-1	337	12	37498.5	12	185	0.3086	Transaldolase isoform Iso 1 \Gname=TALDO1 \NcbiTaxId=9606
nxp:NX_P45880-1	309	0	33332.5	12	195	0.3592	Voltage-dependent anion-selective channel protein 2 isoform Iso 1 \Gname=VDAC2 \NcbiTaxId=9606
nxp:NX_P45880-3	294	0	31528.5	12	195	0.3776	Voltage-dependent anion-selective channel protein 2 isoform Iso 2 \Gname=VDAC2 \NcbiTaxId=9606
nxp:NX_P45974-1	858	0	95707.3	12	47	0.2005	Ubiquitin carboxyl-terminal hydrolase 5 isoform Long \Gname=USP5 \NcbiTaxId=9606
nxp:NX_P45974-2	835	0	93230.3	12	47	0.206	Ubiquitin carboxyl-terminal hydrolase 5 isoform Short \Gname=USP5 \NcbiTaxId=9606
nxp:NX_P46109-1	303	12	33737.9	12	156	0.4851	Crk-like protein isoform Iso 1 \Gname=CRKL \NcbiTaxId=9606
nxp:NX_P48426-1	406	12	46177.5	12	182	0.2044	Phosphatidylinositol 5-phosphate 4-kinase type-2 alpha isoform Iso 1 \Gname=PIP4K2A \NcbiTaxId=9606
nxp:NX_P50148-1	359	11	42097.3	12	244	0.3036	Guanine nucleotide-binding protein G(q) subunit alpha isoform Iso 1 \Gname=GNAQ \NcbiTaxId=9606
nxp:NX_P50453-1	376	9	42358.3	12	212	0.2952	Serpin B9 isoform Iso 1 \Gname=SERPINB9 \NcbiTaxId=9606
nxp:NX_P52565-1	204	10	23174.7	12	158	0.348	Rho GDP-dissociation inhibitor 1 isoform Iso 1 \Gname=ARHGDIA \NcbiTaxId=9606
nxp:NX_P52566-1	201	10	22955.6	12	132	0.5075	Rho GDP-dissociation inhibitor 2 isoform Iso 1 \Gname=ARHGDIB \NcbiTaxId=9606
nxp:NX_P60981-1	165	10	18475.5	12	150	0.4788	Destrin isoform Iso 2 \Gname=DSTN \NcbiTaxId=9606
nxp:NX_P61586-1	193	9	21736.1	12	311	0.3679	Transforming protein RhoA isoform Iso 1 \Gname=RHOA \NcbiTaxId=9606
nxp:NX_P62491-1	216	9	24360.4	12	231	0.5	Ras-related protein Rab-11A isoform Iso 1 \Gname=RAB11A \NcbiTaxId=9606
nxp:NX_P62873-1	340	6	37335	12	218	0.4029	Guanine nucleotide-binding protein G(I)/G(S)/G(T) subunit beta-1 isoform Iso 1 \Gname=GNB1 \NcbiTaxId=9606
nxp:NX_Q00013-1	466	0	52245.6	12	154	0.3069	55 kDa erythrocyte membrane protein isoform Iso 1 \Gname=MPP1 \NcbiTaxId=9606
nxp:NX_Q00013-2	436	0	49026	12	154	0.328	55 kDa erythrocyte membrane protein isoform Iso 2 \Gname=MPP1 \NcbiTaxId=9606
nxp:NX_Q01433-2	798	0	91994.3	12	73	0.1391	AMP deaminase 2 isoform Iso 5 \Gname=AMPD2 \NcbiTaxId=9606
nxp:NX_Q07000-1	366	0	40819.2	12	112	0.3716	HLA class I histocompatibility antigen. Cw-15 alpha chain isoform Iso 1 \Gname=HLA-C \NcbiTaxId=9606
nxp:NX_Q14571-1	2701	9	307848.5	12	42	0.0355	Inositol 1.4.5-trisphosphate receptor type 2 isoform Long \Gname=ITPR2 \NcbiTaxId=9606
nxp:NX_Q15365-1	356	11	37455.9	12	210	0.4213	Poly(rC)-binding protein 1 isoform Iso 1 \Gname=PCBP1 \NcbiTaxId=9606
nxp:NX_Q15691-1	268	9	29962.2	12	241	0.3358	Microtubule-associated protein RP/EB family member 1 isoform Iso 1 \Gname=MAPRE1 \NcbiTaxId=9606
nxp:NX_Q16762-1	297	12	33389.8	12	168	0.4007	Thiosulfate sulfurtransferase isoform Iso 1 \Gname=TST \NcbiTaxId=9606
nxp:NX_Q6PJW8-1	725	12	79529.2	12	145	0.16	Consortin isoform Iso 1 \Gname=CNST \NcbiTaxId=9606
nxp:NX_Q99714-2	252	0	25949.6	12	69	0.6508	3-hydroxyacyl-CoA dehydrogenase type-2 isoform Iso 2 \Gname=HSD17B10 \NcbiTaxId=9606
nxp:NX_Q99733-1	375	8	42778.9	12	166	0.24	Nucleosome assembly protein 1-like 4 isoform Iso 1 \Gname=NAP1L4 \NcbiTaxId=9606
nxp:NX_Q9BS26-1	406	12	46923.4	12	107	0.3128	Endoplasmic reticulum resident protein 44 isoform Iso 1 \Gname=ERP44 \NcbiTaxId=9606
nxp:NX_Q9BX10-1	602	10	65709.1	12	117	0.2176	GTP-binding protein 2 isoform Iso 1 \Gname=GTPBP2 \NcbiTaxId=9606
nxp:NX_Q9UBC2-1	864	0	94179	12	156	0.1701	Epidermal growth factor receptor substrate 15-like 1 isoform Iso 1 \Gname=EPS15L1 \NcbiTaxId=9606
nxp:NX_Q9UBC2-2	910	0	99526.7	12	156	0.1615	Epidermal growth factor receptor substrate 15-like 1 isoform Iso 2 \Gname=EPS15L1 \NcbiTaxId=9606
nxp:NX_Q9UBC2-3	754	0	83178.7	12	156	0.195	Epidermal growth factor receptor substrate 15-like 1 isoform Iso 3 \Gname=EPS15L1 \NcbiTaxId=9606
nxp:NX_Q9UBC2-4	601	0	66419.9	12	156	0.2446	Epidermal growth factor receptor substrate 15-like 1 isoform Iso 4 \Gname=EPS15L1 \NcbiTaxId=9606
nxp:NX_Q9Y251-3	469	0	53109.1	12	63	0.2324	Heparanase isoform Iso 3 \Gname=HPSE \NcbiTaxId=9606
nxp:NX_Q9Y5S2-1	1711	12	194174.8	12	49	0.0888	Serine/threonine-protein kinase MRCK beta isoform Iso 1 \Gname=CDC42BPB \NcbiTaxId=9606
nxp:NX_Q9Y624-1	299	12	32544.5	12	152	0.3679	Junctional adhesion molecule A isoform Iso 1 \Gname=F11R \NcbiTaxId=9606
nxp:NX_O00231-1	422	0	47416	11	132	0.2512	26S proteasome non-ATPase regulatory subunit 11 isoform Iso 1 \Gname=PSMD11 \NcbiTaxId=9606
nxp:NX_O00231-2	423	0	47487.1	11	132	0.2506	26S proteasome non-ATPase regulatory subunit 11 isoform Iso 2 \Gname=PSMD11 \NcbiTaxId=9606
nxp:NX_O14974-2	995	0	111100.2	11	92	0.1206	Protein phosphatase 1 regulatory subunit 12A isoform Iso 2 \Gname=PPP1R12A \NcbiTaxId=9606
nxp:NX_O43150-2	961	0	106897.2	11	50	0.1259	Arf-GAP with SH3 domain. ANK repeat and PH domain-containing protein 2 isoform Iso 2 \Gname=ASAP2 \NcbiTaxId=9606
nxp:NX_O60506-1	623	0	69541.6	11	44	0.1814	Heterogeneous nuclear ribonucleoprotein Q isoform Iso 1 \Gname=SYNCRIP \NcbiTaxId=9606
nxp:NX_O60506-2	588	0	65623.6	11	44	0.1922	Heterogeneous nuclear ribonucleoprotein Q isoform Iso 2 \Gname=SYNCRIP \NcbiTaxId=9606
nxp:NX_O60506-3	562	0	62599.3	11	44	0.2011	Heterogeneous nuclear ribonucleoprotein Q isoform Iso 3 \Gname=SYNCRIP \NcbiTaxId=9606
nxp:NX_O60506-4	527	0	58681.3	11	44	0.2144	Heterogeneous nuclear ribonucleoprotein Q isoform Iso 4 \Gname=SYNCRIP \NcbiTaxId=9606
nxp:NX_O95866-7	222	0	23545.4	11	34	0.3559	Protein G6b isoform G \Gname=G6B \NcbiTaxId=9606
nxp:NX_P00915-1	261	11	28834.4	11	59	0.4674	Carbonic anhydrase 1 isoform Iso 1 \Gname=CA1 \NcbiTaxId=9606
nxp:NX_P01033-1	207	11	23137.5	11	141	0.5942	Metalloproteinase inhibitor 1 isoform Iso 1 \Gname=TIMP1 \NcbiTaxId=9606
nxp:NX_P02647-1	267	11	30740.9	11	156	0.4682	Apolipoprotein A-I isoform Iso 1 \Gname=APOA1 \NcbiTaxId=9606
nxp:NX_P06753-3	247	0	28919.8	11	17	0.332	Tropomyosin alpha-3 chain isoform Iso 3 \Gname=TPM3 \NcbiTaxId=9606
nxp:NX_P09622-1	509	11	54125	11	93	0.2377	Dihydrolipoyl dehydrogenase. mitochondrial isoform Iso 1 \Gname=DLD \NcbiTaxId=9606
nxp:NX_P13716-2	359	0	38990.7	11	197	0.2702	Delta-aminolevulinic acid dehydratase isoform Iso 2 \Gname=ALAD \NcbiTaxId=9606
nxp:NX_P13746-1	365	0	40893.2	11	54	0.3452	HLA class I histocompatibility antigen. A-11 alpha chain isoform Iso 1 \Gname=HLA-A \NcbiTaxId=9606
nxp:NX_P13746-2	371	0	41420.5	11	54	0.3396	HLA class I histocompatibility antigen. A-11 alpha chain isoform Iso 2 \Gname=HLA-A \NcbiTaxId=9606
nxp:NX_P13747-1	358	7	40113.8	11	67	0.3268	HLA class I histocompatibility antigen. alpha chain E isoform Iso 1 \Gname=HLA-E \NcbiTaxId=9606
nxp:NX_P13804-1	333	4	35039.6	11	165	0.3964	Electron transfer flavoprotein subunit alpha. mitochondrial isoform Iso 1 \Gname=ETFA \NcbiTaxId=9606
nxp:NX_P14314-1	528	0	59369.8	11	134	0.2576	Glucosidase 2 subunit beta isoform Iso 1 \Gname=PRKCSH \NcbiTaxId=9606
nxp:NX_P14314-2	525	0	59122.7	11	134	0.259	Glucosidase 2 subunit beta isoform Iso 2 \Gname=PRKCSH \NcbiTaxId=9606
nxp:NX_P14770-1	177	11	19015.7	11	349	0.4181	Platelet glycoprotein IX isoform Iso 1 \Gname=GP9 \NcbiTaxId=9606
nxp:NX_P16157-1	1881	0	206118.9	11	52	0.0829	Ankyrin-1 isoform Er1 \Gname=ANK1 \NcbiTaxId=9606
nxp:NX_P16157-10	1806	0	197611.7	11	52	0.0864	Ankyrin-1 isoform Er9 \Gname=ANK1 \NcbiTaxId=9606
nxp:NX_P16157-11	1644	0	180356.7	11	52	0.0949	Ankyrin-1 isoform Er10 \Gname=ANK1 \NcbiTaxId=9606
nxp:NX_P16157-12	1905	0	208738.6	11	52	0.0819	Ankyrin-1 isoform Er11 \Gname=ANK1 \NcbiTaxId=9606
nxp:NX_P16157-13	1743	0	191483.5	11	52	0.0895	Ankyrin-1 isoform Er12 \Gname=ANK1 \NcbiTaxId=9606
nxp:NX_P16157-14	1983	0	217325.9	11	52	0.0787	Ankyrin-1 isoform Er13 \Gname=ANK1 \NcbiTaxId=9606
nxp:NX_P16157-15	1821	0	200070.8	11	52	0.0857	Ankyrin-1 isoform Er14 \Gname=ANK1 \NcbiTaxId=9606
nxp:NX_P16157-16	1858	0	203391.9	11	52	0.084	Ankyrin-1 isoform Er15 \Gname=ANK1 \NcbiTaxId=9606
nxp:NX_P16157-21	1897	0	208092.3	11	52	0.0822	Ankyrin-1 isoform Br21 \Gname=ANK1 \NcbiTaxId=9606
nxp:NX_P16157-3	1880	0	205880.2	11	52	0.083	Ankyrin-1 isoform Er5 \Gname=ANK1 \NcbiTaxId=9606
nxp:NX_P16157-4	1719	0	188863.8	11	52	0.0908	Ankyrin-1 isoform Er2 \Gname=ANK1 \NcbiTaxId=9606
nxp:NX_P16157-5	1856	0	203260.5	11	52	0.0841	Ankyrin-1 isoform Er3 \Gname=ANK1 \NcbiTaxId=9606
nxp:NX_P16157-6	1694	0	186005.5	11	52	0.0921	Ankyrin-1 isoform Er4 \Gname=ANK1 \NcbiTaxId=9606
nxp:NX_P16157-7	1718	0	188625.1	11	52	0.0908	Ankyrin-1 isoform Er6 \Gname=ANK1 \NcbiTaxId=9606
nxp:NX_P16157-8	1834	0	200772.2	11	52	0.0851	Ankyrin-1 isoform Er7 \Gname=ANK1 \NcbiTaxId=9606
nxp:NX_P16157-9	1672	0	183517.2	11	52	0.0933	Ankyrin-1 isoform Er8 \Gname=ANK1 \NcbiTaxId=9606
nxp:NX_P17612-1	351	0	40546	11	163	0.2707	cAMP-dependent protein kinase catalytic subunit alpha isoform Iso 1 \Gname=PRKACA \NcbiTaxId=9606
nxp:NX_P17612-2	343	0	39778.6	11	163	0.277	cAMP-dependent protein kinase catalytic subunit alpha isoform Iso 2 \Gname=PRKACA \NcbiTaxId=9606
nxp:NX_P18463-1	362	0	40413.1	11	36	0.2845	HLA class I histocompatibility antigen. B-37 alpha chain isoform Iso 1 \Gname=HLA-B \NcbiTaxId=9606
nxp:NX_P22694-1	351	0	40579	11	78	0.2707	cAMP-dependent protein kinase catalytic subunit beta isoform Iso 1 \Gname=PRKACB \NcbiTaxId=9606
nxp:NX_P22694-3	339	0	39433.5	11	78	0.2802	cAMP-dependent protein kinase catalytic subunit beta isoform Iso 3 \Gname=PRKACB \NcbiTaxId=9606
nxp:NX_P22694-4	338	0	39336.4	11	78	0.2811	cAMP-dependent protein kinase catalytic subunit beta isoform Iso 4 \Gname=PRKACB \NcbiTaxId=9606
nxp:NX_P22694-5	354	0	40903.1	11	78	0.2684	cAMP-dependent protein kinase catalytic subunit beta isoform Iso 5 \Gname=PRKACB \NcbiTaxId=9606
nxp:NX_P22694-6	357	0	41252.2	11	78	0.2661	cAMP-dependent protein kinase catalytic subunit beta isoform Iso 6 \Gname=PRKACB \NcbiTaxId=9606
nxp:NX_P22694-7	355	0	41002.1	11	78	0.2676	cAMP-dependent protein kinase catalytic subunit beta isoform Iso 7 \Gname=PRKACB \NcbiTaxId=9606
nxp:NX_P22694-9	358	0	41351.3	11	78	0.2654	cAMP-dependent protein kinase catalytic subunit beta isoform Iso 9 \Gname=PRKACB \NcbiTaxId=9606
nxp:NX_P26447-1	101	11	11702.7	11	143	0.5347	Protein S100-A4 isoform Iso 1 \Gname=S100A4 \NcbiTaxId=9606
nxp:NX_P30086-1	187	11	21025.7	11	141	0.7326	Phosphatidylethanolamine-binding protein 1 isoform Iso 1 \Gname=PEBP1 \NcbiTaxId=9606
nxp:NX_P30447-1	365	0	40689.1	11	74	0.2849	HLA class I histocompatibility antigen. A-23 alpha chain isoform Iso 1 \Gname=HLA-A \NcbiTaxId=9606
nxp:NX_P30453-1	365	1	41011.1	11	41	0.337	HLA class I histocompatibility antigen. A-34 alpha chain isoform Iso 1 \Gname=HLA-A \NcbiTaxId=9606
nxp:NX_P30475-1	362	0	40284.9	11	57	0.3039	HLA class I histocompatibility antigen. B-39 alpha chain isoform Iso 1 \Gname=HLA-B \NcbiTaxId=9606
nxp:NX_P30480-1	362	1	40289.9	11	62	0.3094	HLA class I histocompatibility antigen. B-42 alpha chain isoform Iso 1 \Gname=HLA-B \NcbiTaxId=9606
nxp:NX_P30510-1	366	1	40794.1	11	81	0.3415	HLA class I histocompatibility antigen. Cw-14 alpha chain isoform Iso 1 \Gname=HLA-C \NcbiTaxId=9606
nxp:NX_P40763-1	770	8	87993.4	11	115	0.2078	Signal transducer and activator of transcription 3 isoform Iso 1 \Gname=STAT3 \NcbiTaxId=9606
nxp:NX_P40925-1	334	0	36385	11	272	0.4222	Malate dehydrogenase. cytoplasmic isoform Iso 2 \Gname=MDH1 \NcbiTaxId=9606
nxp:NX_P40925-3	352	0	38585.1	11	272	0.4006	Malate dehydrogenase. cytoplasmic isoform Iso 3 \Gname=MDH1 \NcbiTaxId=9606
nxp:NX_P46459-1	744	11	82524.1	11	83	0.1559	Vesicle-fusing ATPase isoform Iso 1 \Gname=NSF \NcbiTaxId=9606
nxp:NX_P48444-1	511	11	57156.1	11	167	0.2055	Coatomer subunit delta isoform Iso 1 \Gname=ARCN1 \NcbiTaxId=9606
nxp:NX_P49588-1	968	11	106725.2	11	76	0.1405	Alanine--tRNA ligase. cytoplasmic isoform Iso 1 \Gname=AARS \NcbiTaxId=9606
nxp:NX_P50224-1	295	9	34156.1	11	109	0.3322	Sulfotransferase 1A3/1A4 isoform Iso 1 \Gname=SULT1A3;SULT1A4 \NcbiTaxId=9606
nxp:NX_P50570-3	866	0	97474.9	11	65	0.1386	Dynamin-2 isoform Iso 3 \Gname=DNM2 \NcbiTaxId=9606
nxp:NX_P50570-4	870	0	97887.1	11	65	0.1379	Dynamin-2 isoform Iso 4 \Gname=DNM2 \NcbiTaxId=9606
nxp:NX_P54652-1	639	1	69959.9	11	63	0.1471	Heat shock-related 70 kDa protein 2 isoform Iso 1 \Gname=HSPA2 \NcbiTaxId=9606
nxp:NX_P59998-1	168	0	19636.3	11	434	0.4583	Actin-related protein 2/3 complex subunit 4 isoform Iso 4 \Gname=ARPC4 \NcbiTaxId=9606
nxp:NX_P59998-3	187	0	21556.2	11	434	0.4118	Actin-related protein 2/3 complex subunit 4 isoform Iso 3 \Gname=ARPC4 \NcbiTaxId=9606
nxp:NX_P61106-1	215	11	23863.9	11	338	0.5395	Ras-related protein Rab-14 isoform Iso 1 \Gname=RAB14 \NcbiTaxId=9606
nxp:NX_P62826-1	216	11	24389.6	11	215	0.4352	GTP-binding nuclear protein Ran isoform Iso 1 \Gname=RAN \NcbiTaxId=9606
nxp:NX_Q00013-3	446	0	49804.5	11	140	0.3027	55 kDa erythrocyte membrane protein isoform Iso 3 \Gname=MPP1 \NcbiTaxId=9606
nxp:NX_Q01813-2	776	0	85243.4	11	26	0.1534	6-phosphofructokinase type C isoform Iso 2 \Gname=PFKP \NcbiTaxId=9606
nxp:NX_Q12907-1	356	11	40185.1	11	63	0.2472	Vesicular integral-membrane protein VIP36 isoform Iso 1 \Gname=LMAN2 \NcbiTaxId=9606
nxp:NX_Q13464-1	1354	7	158057.7	11	106	0.0716	Rho-associated protein kinase 1 isoform Iso 1 \Gname=ROCK1 \NcbiTaxId=9606
nxp:NX_Q13884-1	538	10	58007	11	79	0.2509	Beta-1-syntrophin isoform Iso 1 \Gname=SNTB1 \NcbiTaxId=9606
nxp:NX_Q13976-2	686	9	77736.6	11	131	0.2216	cGMP-dependent protein kinase 1 isoform Beta \Gname=PRKG1 \NcbiTaxId=9606
nxp:NX_Q14432-1	1141	11	124882.6	11	70	0.1315	cGMP-inhibited 3'.5'-cyclic phosphodiesterase A isoform Iso 1 \Gname=PDE3A \NcbiTaxId=9606
nxp:NX_Q15019-2	396	11	45414.2	11	280	0.3485	Septin-2 isoform Iso 1 \Gname=SEPT2 \NcbiTaxId=9606
nxp:NX_Q29836-1	362	0	40299	11	57	0.3039	HLA class I histocompatibility antigen. B-67 alpha chain isoform Iso 1 \Gname=HLA-B \NcbiTaxId=9606
nxp:NX_Q6DD88-1	541	11	60485.4	11	87	0.2495	Atlastin-3 isoform Iso 1 \Gname=ATL3 \NcbiTaxId=9606
nxp:NX_Q6XQN6-1	538	8	57524	11	89	0.2918	Nicotinate phosphoribosyltransferase isoform Iso 1 \Gname=NAPRT1 \NcbiTaxId=9606
nxp:NX_Q6ZU35-1	1233	11	136659.8	11	69	0.1225	Uncharacterized protein KIAA1211 isoform Iso 1 \Gname=KIAA1211 \NcbiTaxId=9606
nxp:NX_Q7L7X3-1	1001	11	115979.4	11	90	0.1309	Serine/threonine-protein kinase TAO1 isoform Iso 1 \Gname=TAOK1 \NcbiTaxId=9606
nxp:NX_Q8NG06-1	486	11	54713.5	11	118	0.2716	Tripartite motif-containing protein 58 isoform Iso 1 \Gname=TRIM58 \NcbiTaxId=9606
nxp:NX_Q95365-1	362	0	40373	11	57	0.3039	HLA class I histocompatibility antigen. B-38 alpha chain isoform Iso 1 \Gname=HLA-B \NcbiTaxId=9606
nxp:NX_Q96AP7-1	390	11	41132.6	11	100	0.259	Endothelial cell-selective adhesion molecule isoform Iso 1 \Gname=ESAM \NcbiTaxId=9606
nxp:NX_Q96G03-1	612	11	68222.4	11	74	0.2042	Phosphoglucomutase-2 isoform Iso 1 \Gname=PGM2 \NcbiTaxId=9606
nxp:NX_Q96KP4-1	475	11	52826.9	11	152	0.3074	Cytosolic non-specific dipeptidase isoform Iso 1 \Gname=CNDP2 \NcbiTaxId=9606
nxp:NX_Q96P48-3	1439	0	160874.8	11	55	0.1028	Arf-GAP with Rho-GAP domain. ANK repeat and PH domain-containing protein 1 isoform Iso 3 \Gname=ARAP1 \NcbiTaxId=9606
nxp:NX_Q96P48-6	1450	0	162071.3	11	55	0.1021	Arf-GAP with Rho-GAP domain. ANK repeat and PH domain-containing protein 1 isoform Iso 4 \Gname=ARAP1 \NcbiTaxId=9606
nxp:NX_Q96QK1-1	796	11	91630.9	11	95	0.1683	Vacuolar protein sorting-associated protein 35 isoform Iso 1 \Gname=VPS35 \NcbiTaxId=9606
nxp:NX_Q96T51-1	708	9	79749.3	11	50	0.2189	RUN and FYVE domain-containing protein 1 isoform Iso 2 \Gname=RUFY1 \NcbiTaxId=9606
nxp:NX_Q9BR76-1	489	9	54182.2	11	58	0.2147	Coronin-1B isoform Iso 1 \Gname=CORO1B \NcbiTaxId=9606
nxp:NX_Q9H0U4-1	201	9	22139.2	11	167	0.4677	Ras-related protein Rab-1B isoform Iso 1 \Gname=RAB1B \NcbiTaxId=9606
nxp:NX_Q9H299-1	93	11	10413.3	11	239	0.4516	SH3 domain-binding glutamic acid-rich-like protein 3 isoform Iso 1 \Gname=SH3BGRL3 \NcbiTaxId=9606
nxp:NX_Q9H3U1-1	944	0	102993.5	11	86	0.1261	Protein unc-45 homolog A isoform Iso 1 \Gname=UNC45A \NcbiTaxId=9606
nxp:NX_Q9H3U1-2	929	0	101592.8	11	86	0.1281	Protein unc-45 homolog A isoform Iso 3 \Gname=UNC45A \NcbiTaxId=9606
nxp:NX_Q9NR31-1	198	11	22334.5	11	259	0.3889	GTP-binding protein SAR1a isoform Iso 1 \Gname=SAR1A \NcbiTaxId=9606
nxp:NX_Q9UKE5-1	1360	0	154829.5	11	83	0.0978	TRAF2 and NCK-interacting protein kinase isoform Iso 1 \Gname=TNIK \NcbiTaxId=9606
nxp:NX_Q9UKE5-2	1331	0	151188.6	11	79	0.0999	TRAF2 and NCK-interacting protein kinase isoform Iso 2 \Gname=TNIK \NcbiTaxId=9606
nxp:NX_Q9UKE5-3	1305	0	148719.4	11	83	0.1019	TRAF2 and NCK-interacting protein kinase isoform Iso 3 \Gname=TNIK \NcbiTaxId=9606
nxp:NX_Q9UKE5-4	1352	0	153895	11	83	0.0984	TRAF2 and NCK-interacting protein kinase isoform Iso 4 \Gname=TNIK \NcbiTaxId=9606
nxp:NX_Q9UKE5-5	1276	0	145078.4	11	83	0.1042	TRAF2 and NCK-interacting protein kinase isoform Iso 5 \Gname=TNIK \NcbiTaxId=9606
nxp:NX_Q9UKE5-6	1323	0	150254.1	11	83	0.1005	TRAF2 and NCK-interacting protein kinase isoform Iso 6 \Gname=TNIK \NcbiTaxId=9606
nxp:NX_Q9UKE5-7	1297	0	147784.9	11	83	0.1025	TRAF2 and NCK-interacting protein kinase isoform Iso 7 \Gname=TNIK \NcbiTaxId=9606
nxp:NX_Q9UKE5-8	1268	0	144143.9	11	83	0.1049	TRAF2 and NCK-interacting protein kinase isoform Iso 8 \Gname=TNIK \NcbiTaxId=9606
nxp:NX_Q9Y608-2	400	0	45368.1	11	108	0.2675	Leucine-rich repeat flightless-interacting protein 2 isoform Iso 3 \Gname=LRRFIP2 \NcbiTaxId=9606
nxp:NX_Q9Y608-4	424	0	48246.6	11	108	0.2524	Leucine-rich repeat flightless-interacting protein 2 isoform Iso 4 \Gname=LRRFIP2 \NcbiTaxId=9606
nxp:NX_Q9Y6N5-1	450	11	49910.8	11	87	0.2889	Sulfide:quinone oxidoreductase. mitochondrial isoform Iso 1 \Gname=SQRDL \NcbiTaxId=9606
nxp:NX_A0FGR8-1	921	0	102275.9	10	31	0.1249	Extended synaptotagmin-2 isoform Iso 1 \Gname=ESYT2 \NcbiTaxId=9606
nxp:NX_A0FGR8-2	893	8	98822	10	131	0.1321	Extended synaptotagmin-2 isoform Iso 2 \Gname=ESYT2 \NcbiTaxId=9606
nxp:NX_A0FGR8-6	942	0	104625.2	10	31	0.1221	Extended synaptotagmin-2 isoform Iso 6 \Gname=ESYT2 \NcbiTaxId=9606
nxp:NX_O00159-1	1063	0	121587.9	10	59	0.1082	Unconventional myosin-Ic isoform Iso 1 \Gname=MYO1C \NcbiTaxId=9606
nxp:NX_O00159-3	1044	0	119535.7	10	59	0.1102	Unconventional myosin-Ic isoform Iso 2 \Gname=MYO1C \NcbiTaxId=9606
nxp:NX_O14983-1	1001	0	110163.6	10	20	0.0989	Sarcoplasmic/endoplasmic reticulum calcium ATPase 1 isoform SERCA1B \Gname=ATP2A1 \NcbiTaxId=9606
nxp:NX_O14983-2	994	0	109195.1	10	20	0.0996	Sarcoplasmic/endoplasmic reticulum calcium ATPase 1 isoform SERCA1A \Gname=ATP2A1 \NcbiTaxId=9606
nxp:NX_O15231-1	689	0	73462.2	10	80	0.2104	Zinc finger protein 185 isoform Iso 1 \Gname=ZNF185 \NcbiTaxId=9606
nxp:NX_O15231-3	690	0	73549.2	10	80	0.2101	Zinc finger protein 185 isoform Iso 3 \Gname=ZNF185 \NcbiTaxId=9606
nxp:NX_O15231-4	630	0	67222	10	79	0.2302	Zinc finger protein 185 isoform Iso 4 \Gname=ZNF185 \NcbiTaxId=9606
nxp:NX_O15231-7	660	0	70318.5	10	79	0.2197	Zinc finger protein 185 isoform Iso 7 \Gname=ZNF185 \NcbiTaxId=9606
nxp:NX_O15327-1	924	10	104653.5	10	46	0.1288	Type II inositol 3.4-bisphosphate 4-phosphatase isoform Iso 1 \Gname=INPP4B \NcbiTaxId=9606
nxp:NX_O43182-2	765	0	83855.8	10	56	0.1542	Rho GTPase-activating protein 6 isoform Iso 5 \Gname=ARHGAP6 \NcbiTaxId=9606
nxp:NX_O43182-3	690	0	75852.8	10	56	0.171	Rho GTPase-activating protein 6 isoform Iso 2 \Gname=ARHGAP6 \NcbiTaxId=9606
nxp:NX_O60664-1	434	0	47027.9	10	55	0.3134	Perilipin-3 isoform Iso 1 \Gname=PLIN3 \NcbiTaxId=9606
nxp:NX_O60664-4	422	0	45757.2	10	55	0.3223	Perilipin-3 isoform Iso 2 \Gname=PLIN3 \NcbiTaxId=9606
nxp:NX_O75351-1	444	10	49253.5	10	68	0.2455	Vacuolar protein sorting-associated protein 4B isoform Iso 1 \Gname=VPS4B \NcbiTaxId=9606
nxp:NX_O75791-1	330	10	37867.7	10	130	0.3545	GRB2-related adapter protein 2 isoform Iso 1 \Gname=GRAP2 \NcbiTaxId=9606
nxp:NX_O94919-1	500	10	54963.3	10	170	0.172	Endonuclease domain-containing 1 protein isoform Iso 1 \Gname=ENDOD1 \NcbiTaxId=9606
nxp:NX_O95866-1	241	1	26129	10	52	0.4025	Protein G6b isoform B \Gname=G6B \NcbiTaxId=9606
nxp:NX_P00367-1	558	10	61341.2	10	114	0.2133	Glutamate dehydrogenase 1. mitochondrial isoform Iso 1 \Gname=GLUD1 \NcbiTaxId=9606
nxp:NX_P00492-1	218	9	24545.6	10	79	0.4083	Hypoxanthine-guanine phosphoribosyltransferase isoform Iso 1 \Gname=HPRT1 \NcbiTaxId=9606
nxp:NX_P00568-1	194	10	21603.3	10	147	0.4948	Adenylate kinase isoenzyme 1 isoform Iso 1 \Gname=AK1 \NcbiTaxId=9606
nxp:NX_P01009-2	359	0	40219.6	10	69	0.273	Alpha-1-antitrypsin isoform Iso 3 \Gname=SERPINA1 \NcbiTaxId=9606
nxp:NX_P03989-1	362	1	40385	10	45	0.3149	HLA class I histocompatibility antigen. B-27 alpha chain isoform Iso 1 \Gname=HLA-B \NcbiTaxId=9606
nxp:NX_P05771-1	671	0	76801.1	10	26	0.1565	Protein kinase C beta type isoform Beta-I \Gname=PRKCB \NcbiTaxId=9606
nxp:NX_P0CG47-1	229	0	25727.8	10	240	0.2314	Polyubiquitin-B isoform Iso 1 \Gname=UBB \NcbiTaxId=9606
nxp:NX_P0CG48-1	685	0	76973.5	10	239	0.0774	Polyubiquitin-C isoform Iso 1 \Gname=UBC \NcbiTaxId=9606
nxp:NX_P10124-1	158	10	17622.6	10	119	0.2975	Serglycin isoform Iso 1 \Gname=SRGN \NcbiTaxId=9606
nxp:NX_P13804-2	284	0	29988.9	10	161	0.419	Electron transfer flavoprotein subunit alpha. mitochondrial isoform Iso 2 \Gname=ETFA \NcbiTaxId=9606
nxp:NX_P14317-1	486	10	53963	10	127	0.1975	Hematopoietic lineage cell-specific protein isoform Iso 1 \Gname=HCLS1 \NcbiTaxId=9606
nxp:NX_P16157-2	1519	0	166358.1	10	41	0.0941	Ankyrin-1 isoform Er16 \Gname=ANK1 \NcbiTaxId=9606
nxp:NX_P17252-1	672	4	76682.1	10	40	0.1429	Protein kinase C alpha type isoform Iso 1 \Gname=PRKCA \NcbiTaxId=9606
nxp:NX_P18085-1	180	4	20479.7	10	203	0.45	ADP-ribosylation factor 4 isoform Iso 1 \Gname=ARF4 \NcbiTaxId=9606
nxp:NX_P22695-1	453	10	48394.9	10	168	0.3179	Cytochrome b-c1 complex subunit 2. mitochondrial isoform Iso 1 \Gname=UQCRC2 \NcbiTaxId=9606
nxp:NX_P23368-2	479	0	53533.7	10	34	0.2192	NAD-dependent malic enzyme. mitochondrial isoform Iso 2 \Gname=ME2 \NcbiTaxId=9606
nxp:NX_P25325-1	297	10	33139.6	10	116	0.4916	3-mercaptopyruvate sulfurtransferase isoform Iso 1 \Gname=MPST \NcbiTaxId=9606
nxp:NX_P28482-1	360	10	41345.2	10	146	0.2361	Mitogen-activated protein kinase 1 isoform Iso 1 \Gname=MAPK1 \NcbiTaxId=9606
nxp:NX_P30460-1	362	0	40287.8	10	20	0.2873	HLA class I histocompatibility antigen. B-8 alpha chain isoform Iso 1 \Gname=HLA-B \NcbiTaxId=9606
nxp:NX_P30466-1	362	1	40232	10	49	0.2569	HLA class I histocompatibility antigen. B-18 alpha chain isoform Iso 1 \Gname=HLA-B \NcbiTaxId=9606
nxp:NX_P30504-1	366	0	40951.3	10	74	0.3087	HLA class I histocompatibility antigen. Cw-4 alpha chain isoform Iso 1 \Gname=HLA-C \NcbiTaxId=9606
nxp:NX_P33176-1	963	8	109599	10	48	0.1277	Kinesin-1 heavy chain isoform Iso 1 \Gname=KIF5B \NcbiTaxId=9606
nxp:NX_P36959-1	345	9	37376.8	10	168	0.3797	GMP reductase 1 isoform Iso 1 \Gname=GMPR \NcbiTaxId=9606
nxp:NX_P40227-2	486	1	53237.1	10	99	0.1852	T-complex protein 1 subunit zeta isoform Iso 2 \Gname=CCT6A \NcbiTaxId=9606
nxp:NX_P40763-2	769	1	87906.3	10	102	0.1795	Signal transducer and activator of transcription 3 isoform Del-701 \Gname=STAT3 \NcbiTaxId=9606
nxp:NX_P42224-1	750	10	87261.5	10	55	0.1413	Signal transducer and activator of transcription 1-alpha/beta isoform Beta \Gname=STAT1 \NcbiTaxId=9606
nxp:NX_P48047-1	213	10	23244.6	10	147	0.5587	ATP synthase subunit O. mitochondrial isoform Iso 1 \Gname=ATP5O \NcbiTaxId=9606
nxp:NX_P50416-1	773	5	88292.7	10	57	0.1345	Carnitine O-palmitoyltransferase 1. liver isoform isoform Iso 1 \Gname=CPT1A \NcbiTaxId=9606
nxp:NX_P50454-1	418	10	46393.2	10	63	0.2656	Serpin H1 isoform Iso 1 \Gname=SERPINH1 \NcbiTaxId=9606
nxp:NX_P52306-1	607	0	66256.5	10	100	0.1829	Rap1 GTPase-GDP dissociation stimulator 1 isoform Iso 1 \Gname=RAP1GDS1 \NcbiTaxId=9606
nxp:NX_P52306-4	607	0	66256.5	10	100	0.1829	Rap1 GTPase-GDP dissociation stimulator 1 isoform Iso 4 \Gname=RAP1GDS1 \NcbiTaxId=9606
nxp:NX_P52306-5	608	0	66327.6	10	100	0.1826	Rap1 GTPase-GDP dissociation stimulator 1 isoform Iso 5 \Gname=RAP1GDS1 \NcbiTaxId=9606
nxp:NX_P53004-1	296	10	33389.3	10	92	0.375	Biliverdin reductase A isoform Iso 1 \Gname=BLVRA \NcbiTaxId=9606
nxp:NX_P54819-1	239	0	26442.8	10	150	0.3305	Adenylate kinase 2. mitochondrial isoform Iso 1 \Gname=AK2 \NcbiTaxId=9606
nxp:NX_P54819-2	232	0	25580.3	10	150	0.3405	Adenylate kinase 2. mitochondrial isoform Iso 2 \Gname=AK2 \NcbiTaxId=9606
nxp:NX_P54819-5	224	0	24614.7	10	150	0.3527	Adenylate kinase 2. mitochondrial isoform Iso 5 \Gname=AK2 \NcbiTaxId=9606
nxp:NX_P61006-1	207	8	23635.2	10	244	0.3671	Ras-related protein Rab-8A isoform Iso 1 \Gname=RAB8A \NcbiTaxId=9606
nxp:NX_P62140-1	327	1	37144.6	10	119	0.3211	Serine/threonine-protein phosphatase PP1-beta catalytic subunit isoform Iso 1 \Gname=PPP1CB \NcbiTaxId=9606
nxp:NX_P62820-1	205	3	22645.4	10	67	0.4	Ras-related protein Rab-1A isoform Iso 1 \Gname=RAB1A \NcbiTaxId=9606
nxp:NX_P62979-1	156	0	17935.5	10	240	0.3397	Ubiquitin-40S ribosomal protein S27a isoform Iso 1 \Gname=RPS27A \NcbiTaxId=9606
nxp:NX_P62987-1	128	0	14700.9	10	239	0.4141	Ubiquitin-60S ribosomal protein L40 isoform Iso 1 \Gname=UBA52 \NcbiTaxId=9606
nxp:NX_Q01433-3	760	0	88124.4	10	51	0.125	AMP deaminase 2 isoform Ex1A-3 \Gname=AMPD2 \NcbiTaxId=9606
nxp:NX_Q01433-4	804	0	92840.8	10	51	0.1182	AMP deaminase 2 isoform Ex1B-3 \Gname=AMPD2 \NcbiTaxId=9606
nxp:NX_Q02218-1	1023	0	115843.4	10	44	0.1124	2-oxoglutarate dehydrogenase. mitochondrial isoform Iso 1 \Gname=OGDH \NcbiTaxId=9606
nxp:NX_Q02218-2	1019	0	115422.1	10	44	0.1129	2-oxoglutarate dehydrogenase. mitochondrial isoform Iso 2 \Gname=OGDH \NcbiTaxId=9606
nxp:NX_Q13162-1	271	6	30502.8	10	105	0.3875	Peroxiredoxin-4 isoform Iso 1 \Gname=PRDX4 \NcbiTaxId=9606
nxp:NX_Q14254-1	428	10	47016.6	10	112	0.236	Flotillin-2 isoform Iso 1 \Gname=FLOT2 \NcbiTaxId=9606
nxp:NX_Q16531-1	1140	10	126869.3	10	78	0.0833	DNA damage-binding protein 1 isoform Iso 1 \Gname=DDB1 \NcbiTaxId=9606
nxp:NX_Q16539-1	360	8	41249	10	89	0.2944	Mitogen-activated protein kinase 14 isoform CSBP2 \Gname=MAPK14 \NcbiTaxId=9606
nxp:NX_Q16799-1	776	10	83548	10	56	0.1753	Reticulon-1 isoform RTN1-B \Gname=RTN1 \NcbiTaxId=9606
nxp:NX_Q29963-1	366	0	40925.1	10	35	0.3115	HLA class I histocompatibility antigen. Cw-6 alpha chain isoform Iso 1 \Gname=HLA-C \NcbiTaxId=9606
nxp:NX_Q86YW5-2	199	1	21291.2	10	168	0.3668	Trem-like transcript 1 protein isoform Iso 2 \Gname=TREML1 \NcbiTaxId=9606
nxp:NX_Q8IYD1-1	628	3	68821.6	10	39	0.164	Eukaryotic peptide chain release factor GTP-binding subunit ERF3B isoform Iso 1 \Gname=GSPT2 \NcbiTaxId=9606
nxp:NX_Q8N699-1	235	10	26557.6	10	104	0.3957	Myc target protein 1 isoform Iso 1 \Gname=MYCT1 \NcbiTaxId=9606
nxp:NX_Q8NBM8-1	494	10	54593.9	10	97	0.2045	Prenylcysteine oxidase-like isoform Iso 1 \Gname=PCYOX1L \NcbiTaxId=9606
nxp:NX_Q8NE86-1	351	0	39823.8	10	126	0.2678	Calcium uniporter protein. mitochondrial isoform Iso 1 \Gname=MCU \NcbiTaxId=9606
nxp:NX_Q8NE86-3	302	0	35118.3	10	126	0.3113	Calcium uniporter protein. mitochondrial isoform Iso 3 \Gname=MCU \NcbiTaxId=9606
nxp:NX_Q8TDB8-1	520	0	56265.5	10	189	0.0942	Solute carrier family 2. facilitated glucose transporter member 14 isoform Iso 1 \Gname=SLC2A14 \NcbiTaxId=9606
nxp:NX_Q8TDB8-2	497	0	53962.2	10	189	0.0986	Solute carrier family 2. facilitated glucose transporter member 14 isoform Iso 3 \Gname=SLC2A14 \NcbiTaxId=9606
nxp:NX_Q96HC4-4	487	0	53025.9	10	64	0.2136	PDZ and LIM domain protein 5 isoform Iso 4 \Gname=PDLIM5 \NcbiTaxId=9606
nxp:NX_Q9BX10-4	594	0	64829.5	10	48	0.1953	GTP-binding protein 2 isoform Iso 2 \Gname=GTPBP2 \NcbiTaxId=9606
nxp:NX_Q9H3N1-1	280	10	31752.8	10	73	0.2357	Thioredoxin-related transmembrane protein 1 isoform Iso 1 \Gname=TMX1 \NcbiTaxId=9606
nxp:NX_Q9NR12-2	423	0	46462	10	63	0.3191	PDZ and LIM domain protein 7 isoform Iso 2 \Gname=PDLIM7 \NcbiTaxId=9606
nxp:NX_Q9NS28-1	235	10	27547	10	88	0.3319	Regulator of G-protein signaling 18 isoform Iso 1 \Gname=RGS18 \NcbiTaxId=9606
nxp:NX_Q9UFN0-1	247	10	28430.5	10	61	0.413	Protein NipSnap homolog 3A isoform Iso 1 \Gname=NIPSNAP3A \NcbiTaxId=9606
nxp:NX_Q9UIA9-1	1087	10	123810	10	41	0.0975	Exportin-7 isoform Iso 1 \Gname=XPO7 \NcbiTaxId=9606
nxp:NX_Q9UIJ7-1	227	8	25531.5	10	73	0.4361	GTP:AMP phosphotransferase AK3. mitochondrial isoform Iso 1 \Gname=AK3 \NcbiTaxId=9606
nxp:NX_Q9UNZ2-1	370	0	40530.3	10	56	0.3135	NSFL1 cofactor p47 isoform Iso 1 \Gname=NSFL1C \NcbiTaxId=9606
nxp:NX_Q9UNZ2-5	372	0	40773.4	10	56	0.3118	NSFL1 cofactor p47 isoform Iso 3 \Gname=NSFL1C \NcbiTaxId=9606
nxp:NX_Q9Y4D1-1	1078	0	123377.6	10	36	0.0993	Disheveled-associated activator of morphogenesis 1 isoform Iso 1 \Gname=DAAM1 \NcbiTaxId=9606
nxp:NX_Q9Y4D1-2	1068	0	122211.1	10	36	0.1002	Disheveled-associated activator of morphogenesis 1 isoform Iso 2 \Gname=DAAM1 \NcbiTaxId=9606
nxp:NX_Q9Y608-1	721	0	82103.3	10	74	0.1373	Leucine-rich repeat flightless-interacting protein 2 isoform Iso 1 \Gname=LRRFIP2 \NcbiTaxId=9606
nxp:NX_Q9Y6F6-1	885	0	96067.5	10	29	0.139	Protein MRVI1 isoform Iso 1 \Gname=MRVI1 \NcbiTaxId=9606
nxp:NX_Q9Y6F6-2	886	0	96195.5	10	29	0.1388	Protein MRVI1 isoform Iso 2 \Gname=MRVI1 \NcbiTaxId=9606
nxp:NX_Q9Y6F6-3	803	0	87953.7	10	29	0.1532	Protein MRVI1 isoform Iso 6 \Gname=MRVI1 \NcbiTaxId=9606
nxp:NX_Q9Y6F6-4	903	0	97750.4	10	29	0.1362	Protein MRVI1 isoform Iso 4 \Gname=MRVI1 \NcbiTaxId=9606
nxp:NX_Q9Y6F6-5	821	0	89636.6	10	29	0.1498	Protein MRVI1 isoform Iso 5 \Gname=MRVI1 \NcbiTaxId=9606
nxp:NX_Q9Y6F6-7	912	0	98795	10	29	0.1349	Protein MRVI1 isoform Iso 7 \Gname=MRVI1 \NcbiTaxId=9606
nxp:NX_Q9Y6F6-9	904	0	97878.4	10	29	0.1361	Protein MRVI1 isoform Iso 9 \Gname=MRVI1 \NcbiTaxId=9606
nxp:NX_O00264-1	195	9	21639.7	9	148	0.3179	Membrane-associated progesterone receptor component 1 isoform Iso 1 \Gname=PGRMC1 \NcbiTaxId=9606
nxp:NX_O14980-1	1071	9	123288.1	9	21	0.0999	Exportin-1 isoform Iso 1 \Gname=XPO1 \NcbiTaxId=9606
nxp:NX_O15145-1	178	9	20515.4	9	184	0.3034	Actin-related protein 2/3 complex subunit 3 isoform Iso 1 \Gname=ARPC3 \NcbiTaxId=9606
nxp:NX_O15231-5	468	0	49922.8	9	63	0.2885	Zinc finger protein 185 isoform Iso 5 \Gname=ZNF185 \NcbiTaxId=9606
nxp:NX_O15231-6	721	0	76791.8	9	64	0.1803	Zinc finger protein 185 isoform Iso 6 \Gname=ZNF185 \NcbiTaxId=9606
nxp:NX_O15231-8	692	0	73648	9	64	0.1879	Zinc finger protein 185 isoform Iso 8 \Gname=ZNF185 \NcbiTaxId=9606
nxp:NX_O43852-3	323	9	38009	9	100	0.2632	Calumenin isoform Iso 15 \Gname=CALU \NcbiTaxId=9606
nxp:NX_O60268-1	411	9	46591.3	9	92	0.2019	Uncharacterized protein KIAA0513 isoform Iso 2 \Gname=KIAA0513 \NcbiTaxId=9606
nxp:NX_O94886-1	807	9	92048	9	82	0.0979	Transmembrane protein 63A isoform Iso 1 \Gname=TMEM63A \NcbiTaxId=9606
nxp:NX_O95866-3	217	0	23540.3	9	42	0.4194	Protein G6b isoform C \Gname=G6B \NcbiTaxId=9606
nxp:NX_O95866-5	197	0	21298.2	9	42	0.4619	Protein G6b isoform E \Gname=G6B \NcbiTaxId=9606
nxp:NX_O95870-2	525	0	59327.1	9	15	0.1714	Abhydrolase domain-containing protein 16A isoform Iso 2 \Gname=ABHD16A \NcbiTaxId=9606
nxp:NX_P00390-1	522	0	56202.9	9	81	0.2605	Glutathione reductase. mitochondrial isoform Cytoplasmic \Gname=GSR \NcbiTaxId=9606
nxp:NX_P00390-3	493	0	52975.4	9	81	0.2759	Glutathione reductase. mitochondrial isoform Iso 2 \Gname=GSR \NcbiTaxId=9606
nxp:NX_P00505-1	430	9	47469.3	9	90	0.2093	Aspartate aminotransferase. mitochondrial isoform Iso 1 \Gname=GOT2 \NcbiTaxId=9606
nxp:NX_P00738-1	406	9	45158.6	9	54	0.2167	Haptoglobin isoform Iso 1 \Gname=HP \NcbiTaxId=9606
nxp:NX_P01889-1	362	0	40416.9	9	40	0.279	HLA class I histocompatibility antigen. B-7 alpha chain isoform Iso 1 \Gname=HLA-B \NcbiTaxId=9606
nxp:NX_P04439-1	365	1	40797.2	9	34	0.2192	HLA class I histocompatibility antigen. A-3 alpha chain isoform Iso 1 \Gname=HLA-A \NcbiTaxId=9606
nxp:NX_P05121-1	402	9	45013	9	96	0.2164	Plasminogen activator inhibitor 1 isoform Iso 1 \Gname=SERPINE1 \NcbiTaxId=9606
nxp:NX_P07093-1	398	0	43956.2	9	50	0.2462	Glia-derived nexin isoform Iso 1 \Gname=SERPINE2 \NcbiTaxId=9606
nxp:NX_P07093-3	409	0	45219.8	9	50	0.2396	Glia-derived nexin isoform Iso 2 \Gname=SERPINE2 \NcbiTaxId=9606
nxp:NX_P07954-1	510	9	54584.2	9	84	0.2353	Fumarate hydratase. mitochondrial isoform Cytoplasmic \Gname=FH \NcbiTaxId=9606
nxp:NX_P10768-1	282	9	31424.4	9	204	0.4184	S-formylglutathione hydrolase isoform Iso 1 \Gname=ESD \NcbiTaxId=9606
nxp:NX_P11217-1	842	0	97012.6	9	111	0.0938	Glycogen phosphorylase. muscle form isoform Iso 1 \Gname=PYGM \NcbiTaxId=9606
nxp:NX_P13797-1	630	9	70748.2	9	91	0.1429	Plastin-3 isoform Iso 1 \Gname=PLS3 \NcbiTaxId=9606
nxp:NX_P13798-1	732	9	81154.6	9	46	0.1434	Acylamino-acid-releasing enzyme isoform Iso 1 \Gname=APEH \NcbiTaxId=9606
nxp:NX_P15311-1	586	0	69351.7	9	161	0.1058	Ezrin isoform Iso 1 \Gname=EZR \NcbiTaxId=9606
nxp:NX_P15531-2	177	1	19622.9	9	329	0.4407	Nucleoside diphosphate kinase A isoform Iso 1 \Gname=NME1 \NcbiTaxId=9606
nxp:NX_P16152-1	277	9	30337.9	9	104	0.4404	Carbonyl reductase [NADPH] 1 isoform Iso 1 \Gname=CBR1 \NcbiTaxId=9606
nxp:NX_P18031-1	435	9	49916.8	9	111	0.2828	Tyrosine-protein phosphatase non-receptor type 1 isoform Iso 1 \Gname=PTPN1 \NcbiTaxId=9606
nxp:NX_P30044-1	214	9	22054.5	9	246	0.4252	Peroxiredoxin-5. mitochondrial isoform Cytoplasmic+peroxisomal \Gname=PRDX5 \NcbiTaxId=9606
nxp:NX_P30048-1	256	9	27657.2	9	252	0.3789	Thioredoxin-dependent peroxide reductase. mitochondrial isoform Iso 1 \Gname=PRDX3 \NcbiTaxId=9606
nxp:NX_P30483-1	362	0	40371.1	9	45	0.2818	HLA class I histocompatibility antigen. B-45 alpha chain isoform Iso 1 \Gname=HLA-B \NcbiTaxId=9606
nxp:NX_P30485-1	362	0	40528.2	9	32	0.2873	HLA class I histocompatibility antigen. B-47 alpha chain isoform Iso 1 \Gname=HLA-B \NcbiTaxId=9606
nxp:NX_P30487-1	362	0	40538.2	9	45	0.2818	HLA class I histocompatibility antigen. B-49 alpha chain isoform Iso 1 \Gname=HLA-B \NcbiTaxId=9606
nxp:NX_P30488-1	362	0	40498.2	9	45	0.2818	HLA class I histocompatibility antigen. B-50 alpha chain isoform Iso 1 \Gname=HLA-B \NcbiTaxId=9606
nxp:NX_P30492-1	362	0	40337	9	24	0.2486	HLA class I histocompatibility antigen. B-54 alpha chain isoform Iso 1 \Gname=HLA-B \NcbiTaxId=9606
nxp:NX_P30505-1	366	0	40729.2	9	34	0.2623	HLA class I histocompatibility antigen. Cw-8 alpha chain isoform Iso 1 \Gname=HLA-C \NcbiTaxId=9606
nxp:NX_P31040-1	664	9	72627.3	9	43	0.1401	Succinate dehydrogenase [ubiquinone] flavoprotein subunit. mitochondrial isoform Iso 1 \Gname=SDHA \NcbiTaxId=9606
nxp:NX_P36873-1	323	0	36941.7	9	16	0.2477	Serine/threonine-protein phosphatase PP1-gamma catalytic subunit isoform Gamma-1 \Gname=PPP1CC \NcbiTaxId=9606
nxp:NX_P36873-2	337	0	38475.4	9	16	0.2374	Serine/threonine-protein phosphatase PP1-gamma catalytic subunit isoform Gamma-2 \Gname=PPP1CC \NcbiTaxId=9606
nxp:NX_P38117-1	255	0	27808.1	9	42	0.3255	Electron transfer flavoprotein subunit beta isoform Iso 1 \Gname=ETFB \NcbiTaxId=9606
nxp:NX_P38117-2	346	0	37393	9	42	0.2399	Electron transfer flavoprotein subunit beta isoform Iso 2 \Gname=ETFB \NcbiTaxId=9606
nxp:NX_P46939-1	3433	9	394202.2	9	16	0.0312	Utrophin isoform Iso 1 \Gname=UTRN \NcbiTaxId=9606
nxp:NX_P49407-1	418	0	47018.3	9	135	0.2775	Beta-arrestin-1 isoform 1A \Gname=ARRB1 \NcbiTaxId=9606
nxp:NX_P49407-2	410	0	46261.9	9	135	0.2829	Beta-arrestin-1 isoform 1B \Gname=ARRB1 \NcbiTaxId=9606
nxp:NX_P49591-1	514	9	58722	9	68	0.177	Serine--tRNA ligase. cytoplasmic isoform Iso 1 \Gname=SARS \NcbiTaxId=9606
nxp:NX_P50225-1	295	7	34125.2	9	126	0.339	Sulfotransferase 1A1 isoform Iso 1 \Gname=SULT1A1 \NcbiTaxId=9606
nxp:NX_P50416-2	756	0	86165.6	9	44	0.1243	Carnitine O-palmitoyltransferase 1. liver isoform isoform Iso 2 \Gname=CPT1A \NcbiTaxId=9606
nxp:NX_P50502-1	369	4	41287.5	9	81	0.2114	Hsc70-interacting protein isoform Iso 1 \Gname=ST13 \NcbiTaxId=9606
nxp:NX_P51572-2	313	9	34712.3	9	140	0.2141	B-cell receptor-associated protein 31 isoform Iso 1 \Gname=BCAP31 \NcbiTaxId=9606
nxp:NX_P51659-2	761	0	82954.8	9	17	0.1721	Peroxisomal multifunctional enzyme type 2 isoform Iso 2 \Gname=HSD17B4 \NcbiTaxId=9606
nxp:NX_P51659-3	718	0	77803.3	9	17	0.1825	Peroxisomal multifunctional enzyme type 2 isoform Iso 3 \Gname=HSD17B4 \NcbiTaxId=9606
nxp:NX_P61604-1	102	9	10906.9	9	136	0.549	10 kDa heat shock protein. mitochondrial isoform Iso 1 \Gname=HSPE1 \NcbiTaxId=9606
nxp:NX_P84085-1	180	3	20498.6	9	187	0.4	ADP-ribosylation factor 5 isoform Iso 1 \Gname=ARF5 \NcbiTaxId=9606
nxp:NX_Q02153-1	619	0	70451.6	9	49	0.1454	Guanylate cyclase soluble subunit beta-1 isoform HSGC-1 \Gname=GUCY1B3 \NcbiTaxId=9606
nxp:NX_Q02153-2	586	0	66677.5	9	49	0.1536	Guanylate cyclase soluble subunit beta-1 isoform HSGC-2 \Gname=GUCY1B3 \NcbiTaxId=9606
nxp:NX_Q02978-1	314	8	34021.8	9	123	0.3025	Mitochondrial 2-oxoglutarate/malate carrier protein isoform Iso 1 \Gname=SLC25A11 \NcbiTaxId=9606
nxp:NX_Q04826-1	362	0	40462.1	9	32	0.2873	HLA class I histocompatibility antigen. B-40 alpha chain isoform Iso 1 \Gname=HLA-B \NcbiTaxId=9606
nxp:NX_Q14012-1	370	8	41292.7	9	122	0.2946	Calcium/calmodulin-dependent protein kinase type 1 isoform Iso 1 \Gname=CAMK1 \NcbiTaxId=9606
nxp:NX_Q14247-2	634	0	70896.6	9	13	0.1483	Src substrate cortactin isoform Iso 2 \Gname=CTTN \NcbiTaxId=9606
nxp:NX_Q14BN4-1	828	0	95121.6	9	43	0.1087	Sarcolemmal membrane-associated protein isoform Iso 1 \Gname=SLMAP \NcbiTaxId=9606
nxp:NX_Q14BN4-2	790	0	90755.4	9	43	0.1139	Sarcolemmal membrane-associated protein isoform Iso 2 \Gname=SLMAP \NcbiTaxId=9606
nxp:NX_Q14BN4-3	811	0	93127.5	9	43	0.111	Sarcolemmal membrane-associated protein isoform Iso 3 \Gname=SLMAP \NcbiTaxId=9606
nxp:NX_Q16698-1	335	9	36026.8	9	138	0.2478	2.4-dienoyl-CoA reductase. mitochondrial isoform Iso 1 \Gname=DECR1 \NcbiTaxId=9606
nxp:NX_Q29865-1	366	0	40889.3	9	31	0.2814	HLA class I histocompatibility antigen. Cw-18 alpha chain isoform Iso 1 \Gname=HLA-C \NcbiTaxId=9606
nxp:NX_Q3LXA3-1	575	9	58892	9	115	0.2487	Bifunctional ATP-dependent dihydroxyacetone kinase/FAD-AMP lyase (cyclizing) isoform Iso 1 \Gname=DAK \NcbiTaxId=9606
nxp:NX_Q5SQ64-1	297	9	32425.7	9	201	0.3064	Lymphocyte antigen 6 complex locus protein G6f isoform Iso 1 \Gname=LY6G6F \NcbiTaxId=9606
nxp:NX_Q8IUI8-1	442	9	49716.9	9	102	0.276	Cytokine receptor-like factor 3 isoform Iso 2 \Gname=CRLF3 \NcbiTaxId=9606
nxp:NX_Q8NEU8-1	664	0	74428.3	9	109	0.1581	DCC-interacting protein 13-beta isoform Iso 2 \Gname=APPL2 \NcbiTaxId=9606
nxp:NX_Q8NEU8-3	670	0	75118.6	9	109	0.1567	DCC-interacting protein 13-beta isoform Iso 3 \Gname=APPL2 \NcbiTaxId=9606
nxp:NX_Q92928-1	201	0	21985	9	94	0.3632	Putative Ras-related protein Rab-1C isoform Iso 1 \Gname=RAB1C \NcbiTaxId=9606
nxp:NX_Q96RL7-1	3174	0	360029.4	9	22	0.0438	Vacuolar protein sorting-associated protein 13A isoform Iso 1 \Gname=VPS13A \NcbiTaxId=9606
nxp:NX_Q96RL7-2	3095	0	350662.1	9	22	0.0449	Vacuolar protein sorting-associated protein 13A isoform Iso 2 \Gname=VPS13A \NcbiTaxId=9606
nxp:NX_Q96RL7-3	3135	0	355617.1	9	22	0.0443	Vacuolar protein sorting-associated protein 13A isoform Iso 3 \Gname=VPS13A \NcbiTaxId=9606
nxp:NX_Q96RL7-4	3069	0	347434.9	9	22	0.0453	Vacuolar protein sorting-associated protein 13A isoform Iso 4 \Gname=VPS13A \NcbiTaxId=9606
nxp:NX_Q99623-1	299	9	33257.9	9	143	0.3043	Prohibitin-2 isoform Iso 1 \Gname=PHB2 \NcbiTaxId=9606
nxp:NX_Q9BT78-1	406	6	46221.7	9	54	0.2906	COP9 signalosome complex subunit 4 isoform Iso 1 \Gname=COPS4 \NcbiTaxId=9606
nxp:NX_Q9C0I1-1	747	9	86074.8	9	71	0.1687	Myotubularin-related protein 12 isoform Iso 1 \Gname=MTMR12 \NcbiTaxId=9606
nxp:NX_Q9H939-2	312	0	36404.4	9	37	0.2564	Proline-serine-threonine phosphatase-interacting protein 2 isoform Iso 2 \Gname=PSTPIP2 \NcbiTaxId=9606
nxp:NX_Q9NQW7-3	666	8	74732.7	9	152	0.1456	Xaa-Pro aminopeptidase 1 isoform Iso 1 \Gname=XPNPEP1 \NcbiTaxId=9606
nxp:NX_Q9UIB8-1	345	0	38739.6	9	109	0.3884	SLAM family member 5 isoform Iso 1 \Gname=CD84 \NcbiTaxId=9606
nxp:NX_Q9UIB8-2	339	0	38040.2	9	109	0.3953	SLAM family member 5 isoform Iso 2 \Gname=CD84 \NcbiTaxId=9606
nxp:NX_Q9UIB8-3	328	0	36829.6	9	109	0.4085	SLAM family member 5 isoform Iso 3 \Gname=CD84 \NcbiTaxId=9606
nxp:NX_O14818-1	248	8	27851.6	8	91	0.3024	Proteasome subunit alpha type-7 isoform Iso 2 \Gname=PSMA7 \NcbiTaxId=9606
nxp:NX_O15231-2	452	0	48572.5	8	58	0.219	Zinc finger protein 185 isoform Iso 2 \Gname=ZNF185 \NcbiTaxId=9606
nxp:NX_O15511-1	151	8	16292.3	8	110	0.4503	Actin-related protein 2/3 complex subunit 5 isoform Iso 1 \Gname=ARPC5 \NcbiTaxId=9606
nxp:NX_O43399-1	206	0	22206.3	8	111	0.3738	Tumor protein D54 isoform Iso 1 \Gname=TPD52L2 \NcbiTaxId=9606
nxp:NX_O43399-5	220	0	23754	8	111	0.35	Tumor protein D54 isoform Iso 5 \Gname=TPD52L2 \NcbiTaxId=9606
nxp:NX_O43399-7	229	0	24820.5	8	111	0.3362	Tumor protein D54 isoform Iso 7 \Gname=TPD52L2 \NcbiTaxId=9606
nxp:NX_O43815-1	780	0	86060.8	8	24	0.1205	Striatin isoform Iso 1 \Gname=STRN \NcbiTaxId=9606
nxp:NX_O43815-2	731	0	80693	8	24	0.1286	Striatin isoform Iso 2 \Gname=STRN \NcbiTaxId=9606
nxp:NX_O60488-1	711	7	79118.7	8	20	0.1294	Long-chain-fatty-acid--CoA ligase 4 isoform Short \Gname=ACSL4 \NcbiTaxId=9606
nxp:NX_O60749-1	519	8	58416.6	8	91	0.1464	Sorting nexin-2 isoform Iso 1 \Gname=SNX2 \NcbiTaxId=9606
nxp:NX_O76003-1	335	8	37390.2	8	109	0.2866	Glutaredoxin-3 isoform Iso 1 \Gname=GLRX3 \NcbiTaxId=9606
nxp:NX_O95336-1	258	8	27511.5	8	75	0.4302	6-phosphogluconolactonase isoform Iso 1 \Gname=PGLS \NcbiTaxId=9606
nxp:NX_P00390-4	469	0	50446.8	8	69	0.2431	Glutathione reductase. mitochondrial isoform Iso 3 \Gname=GSR \NcbiTaxId=9606
nxp:NX_P00390-5	440	0	47219.2	8	69	0.2591	Glutathione reductase. mitochondrial isoform Iso 4 \Gname=GSR \NcbiTaxId=9606
nxp:NX_P01116-1	189	0	21624	8	44	0.3862	GTPase KRas isoform 2A \Gname=KRAS \NcbiTaxId=9606
nxp:NX_P01116-2	188	0	21392.9	8	44	0.3883	GTPase KRas isoform 2B \Gname=KRAS \NcbiTaxId=9606
nxp:NX_P04844-1	631	0	69223	8	78	0.1933	Dolichyl-diphosphooligosaccharide--protein glycosyltransferase subunit 2 isoform Iso 1 \Gname=RPN2 \NcbiTaxId=9606
nxp:NX_P04844-2	615	0	67663.4	8	78	0.1984	Dolichyl-diphosphooligosaccharide--protein glycosyltransferase subunit 2 isoform Iso 2 \Gname=RPN2 \NcbiTaxId=9606
nxp:NX_P05023-1	1023	0	112805.9	8	38	0.0987	Sodium/potassium-transporting ATPase subunit alpha-1 isoform Iso 1 \Gname=ATP1A1 \NcbiTaxId=9606
nxp:NX_P05023-4	1023	0	112909.9	8	38	0.0987	Sodium/potassium-transporting ATPase subunit alpha-1 isoform Iso 3 \Gname=ATP1A1 \NcbiTaxId=9606
nxp:NX_P08134-1	193	1	21974.2	8	220	0.2746	Rho-related GTP-binding protein RhoC isoform Iso 1 \Gname=RHOC \NcbiTaxId=9606
nxp:NX_P08574-1	325	8	35381	8	86	0.3477	Cytochrome c1. heme protein. mitochondrial isoform Iso 1 \Gname=CYC1 \NcbiTaxId=9606
nxp:NX_P09493-1	284	0	32670.7	8	11	0.2042	Tropomyosin alpha-1 chain isoform Iso 1 \Gname=TPM1 \NcbiTaxId=9606
nxp:NX_P09493-9	284	0	32698.6	8	11	0.2042	Tropomyosin alpha-1 chain isoform Iso 9 \Gname=TPM1 \NcbiTaxId=9606
nxp:NX_P10319-1	362	0	40294	8	34	0.2624	HLA class I histocompatibility antigen. B-58 alpha chain isoform Iso 1 \Gname=HLA-B \NcbiTaxId=9606
nxp:NX_P10599-1	105	4	11711.7	8	54	0.5143	Thioredoxin isoform Iso 1 \Gname=TXN \NcbiTaxId=9606
nxp:NX_P11310-1	421	0	46540.6	8	55	0.2043	Medium-chain specific acyl-CoA dehydrogenase. mitochondrial isoform Iso 1 \Gname=ACADM \NcbiTaxId=9606
nxp:NX_P11310-2	425	0	46971.8	8	55	0.2024	Medium-chain specific acyl-CoA dehydrogenase. mitochondrial isoform Iso 2 \Gname=ACADM \NcbiTaxId=9606
nxp:NX_P11940-1	636	0	70607.9	8	50	0.1399	Polyadenylate-binding protein 1 isoform Iso 1 \Gname=PABPC1 \NcbiTaxId=9606
nxp:NX_P11940-2	547	0	61124	8	50	0.1627	Polyadenylate-binding protein 1 isoform Iso 2 \Gname=PABPC1 \NcbiTaxId=9606
nxp:NX_P13639-1	858	8	95258.9	8	23	0.0932	Elongation factor 2 isoform Iso 1 \Gname=EEF2 \NcbiTaxId=9606
nxp:NX_P13796-1	627	7	70225.9	8	61	0.134	Plastin-2 isoform Iso 1 \Gname=LCP1 \NcbiTaxId=9606
nxp:NX_P16189-1	365	0	40960.2	8	11	0.2603	HLA class I histocompatibility antigen. A-31 alpha chain isoform Iso 1 \Gname=HLA-A \NcbiTaxId=9606
nxp:NX_P16278-1	677	4	76008.6	8	27	0.1448	Beta-galactosidase isoform Iso 3 \Gname=GLB1 \NcbiTaxId=9606
nxp:NX_P16885-1	1265	8	147758.2	8	15	0.0569	1-phosphatidylinositol 4.5-bisphosphate phosphodiesterase gamma-2 isoform Iso 1 \Gname=PLCG2 \NcbiTaxId=9606
nxp:NX_P18669-1	254	8	28767.8	8	167	0.3583	Phosphoglycerate mutase 1 isoform Iso 1 \Gname=PGAM1 \NcbiTaxId=9606
nxp:NX_P20340-1	208	0	23559.9	8	50	0.2308	Ras-related protein Rab-6A isoform Iso 1 \Gname=RAB6A \NcbiTaxId=9606
nxp:NX_P20340-2	208	0	23515.9	8	50	0.2308	Ras-related protein Rab-6A isoform Iso 4 \Gname=RAB6A \NcbiTaxId=9606
nxp:NX_P21281-1	511	8	56446.9	8	60	0.1781	V-type proton ATPase subunit B. brain isoform isoform Iso 1 \Gname=ATP6V1B2 \NcbiTaxId=9606
nxp:NX_P21399-1	889	8	98318.6	8	59	0.099	Cytoplasmic aconitate hydratase isoform Iso 1 \Gname=ACO1 \NcbiTaxId=9606
nxp:NX_P22061-1	227	0	24602.6	8	205	0.4537	Protein-L-isoaspartate(D-aspartate) O-methyltransferase isoform Iso 1 \Gname=PCMT1 \NcbiTaxId=9606
nxp:NX_P22061-2	228	0	24645.5	8	205	0.4518	Protein-L-isoaspartate(D-aspartate) O-methyltransferase isoform Iso 2 \Gname=PCMT1 \NcbiTaxId=9606
nxp:NX_P29218-3	336	7	36652.8	8	46	0.2887	Inositol monophosphatase 1 isoform Iso 1 \Gname=IMPA1 \NcbiTaxId=9606
nxp:NX_P29692-2	647	6	71346.1	8	126	0.1468	Elongation factor 1-delta isoform Iso 1 \Gname=EEF1D \NcbiTaxId=9606
nxp:NX_P30457-1	365	0	41038.1	8	21	0.2521	HLA class I histocompatibility antigen. A-66 alpha chain isoform Iso 1 \Gname=HLA-A \NcbiTaxId=9606
nxp:NX_P36542-1	298	8	32957.3	8	160	0.2315	ATP synthase subunit gamma. mitochondrial isoform Heart \Gname=ATP5C1 \NcbiTaxId=9606
nxp:NX_P42768-1	502	8	52861.9	8	100	0.2092	Wiskott-Aldrich syndrome protein isoform Iso 1 \Gname=WAS \NcbiTaxId=9606
nxp:NX_P42892-1	770	0	87090.2	8	60	0.1403	Endothelin-converting enzyme 1 isoform B \Gname=ECE1 \NcbiTaxId=9606
nxp:NX_P42892-3	754	0	85489.3	8	60	0.1432	Endothelin-converting enzyme 1 isoform C \Gname=ECE1 \NcbiTaxId=9606
nxp:NX_P42892-4	767	0	86949.1	8	60	0.1408	Endothelin-converting enzyme 1 isoform D \Gname=ECE1 \NcbiTaxId=9606
nxp:NX_P47897-1	775	8	87724.9	8	33	0.1187	Glutamine--tRNA ligase isoform Iso 1 \Gname=QARS \NcbiTaxId=9606
nxp:NX_P49593-1	454	8	49782.1	8	41	0.2335	Protein phosphatase 1F isoform Iso 1 \Gname=PPM1F \NcbiTaxId=9606
nxp:NX_P51452-1	185	8	20447.3	8	178	0.3838	Dual specificity protein phosphatase 3 isoform Iso 1 \Gname=DUSP3 \NcbiTaxId=9606
nxp:NX_P51606-1	427	6	48781	8	82	0.1967	N-acylglucosamine 2-epimerase isoform Iso 1 \Gname=RENBP \NcbiTaxId=9606
nxp:NX_P54136-1	660	8	75312.9	8	34	0.1333	Arginine--tRNA ligase. cytoplasmic isoform Monomeric \Gname=RARS \NcbiTaxId=9606
nxp:NX_P54727-1	409	8	43126.6	8	45	0.2274	UV excision repair protein RAD23 homolog B isoform Iso 2 \Gname=RAD23B \NcbiTaxId=9606
nxp:NX_P55060-1	971	0	110328.3	8	18	0.1009	Exportin-2 isoform Iso 1 \Gname=CSE1L \NcbiTaxId=9606
nxp:NX_P55060-3	945	0	107690.9	8	18	0.1037	Exportin-2 isoform Iso 3 \Gname=CSE1L \NcbiTaxId=9606
nxp:NX_P55160-1	1127	7	128053	8	41	0.0754	Nck-associated protein 1-like isoform Iso 2 \Gname=NCKAP1L \NcbiTaxId=9606
nxp:NX_P55884-1	814	0	92405.8	8	62	0.1057	Eukaryotic translation initiation factor 3 subunit B isoform Iso 1 \Gname=EIF3B \NcbiTaxId=9606
nxp:NX_P55884-2	873	0	98949.1	8	62	0.0985	Eukaryotic translation initiation factor 3 subunit B isoform Iso 2 \Gname=EIF3B \NcbiTaxId=9606
nxp:NX_P61019-1	212	7	23512.8	8	121	0.4292	Ras-related protein Rab-2A isoform Iso 1 \Gname=RAB2A \NcbiTaxId=9606
nxp:NX_P62879-1	340	4	37289	8	188	0.2441	Guanine nucleotide-binding protein G(I)/G(S)/G(T) subunit beta-2 isoform Iso 1 \Gname=GNB2 \NcbiTaxId=9606
nxp:NX_P68036-1	154	0	17832.2	8	211	0.487	Ubiquitin-conjugating enzyme E2 L3 isoform Iso 1 \Gname=UBE2L3 \NcbiTaxId=9606
nxp:NX_P68036-2	122	0	14094.3	8	211	0.6148	Ubiquitin-conjugating enzyme E2 L3 isoform Iso 2 \Gname=UBE2L3 \NcbiTaxId=9606
nxp:NX_P68036-3	212	0	23970.6	8	211	0.3538	Ubiquitin-conjugating enzyme E2 L3 isoform Iso 3 \Gname=UBE2L3 \NcbiTaxId=9606
nxp:NX_P69891-1	147	0	16112.3	8	54	0.4286	Hemoglobin subunit gamma-1 isoform Iso 1 \Gname=HBG1 \NcbiTaxId=9606
nxp:NX_P69892-1	147	0	16098.3	8	54	0.4286	Hemoglobin subunit gamma-2 isoform Iso 1 \Gname=HBG2 \NcbiTaxId=9606
nxp:NX_P80303-1	420	0	50146.3	8	27	0.1619	Nucleobindin-2 isoform Iso 1 \Gname=NUCB2 \NcbiTaxId=9606
nxp:NX_P80303-2	420	0	50151.4	8	27	0.1619	Nucleobindin-2 isoform Iso 2 \Gname=NUCB2 \NcbiTaxId=9606
nxp:NX_Q02978-2	263	0	28457.9	8	69	0.3156	Mitochondrial 2-oxoglutarate/malate carrier protein isoform Iso 2 \Gname=SLC25A11 \NcbiTaxId=9606
nxp:NX_Q05193-1	864	0	97329	8	23	0.0833	Dynamin-1 isoform Iso 1 \Gname=DNM1 \NcbiTaxId=9606
nxp:NX_Q05193-2	864	0	97183.9	8	23	0.0833	Dynamin-1 isoform Iso 2 \Gname=DNM1 \NcbiTaxId=9606
nxp:NX_Q05193-3	851	0	95962.3	8	23	0.0846	Dynamin-1 isoform Iso 3 \Gname=DNM1 \NcbiTaxId=9606
nxp:NX_Q05193-4	856	0	96318.5	8	23	0.0841	Dynamin-1 isoform Iso 4 \Gname=DNM1 \NcbiTaxId=9606
nxp:NX_Q05193-5	851	0	95817.2	8	23	0.0846	Dynamin-1 isoform Iso 5 \Gname=DNM1 \NcbiTaxId=9606
nxp:NX_Q07866-1	573	0	65250.9	8	35	0.1483	Kinesin light chain 1 isoform A \Gname=KLC1 \NcbiTaxId=9606
nxp:NX_Q07866-10	618	0	69704.2	8	35	0.1375	Kinesin light chain 1 isoform D \Gname=KLC1 \NcbiTaxId=9606
nxp:NX_Q07866-2	560	0	63758.2	8	35	0.1518	Kinesin light chain 1 isoform C \Gname=KLC1 \NcbiTaxId=9606
nxp:NX_Q07866-3	564	0	64261.4	8	35	0.1507	Kinesin light chain 1 isoform G \Gname=KLC1 \NcbiTaxId=9606
nxp:NX_Q07866-4	637	0	71933.4	8	35	0.1334	Kinesin light chain 1 isoform J \Gname=KLC1 \NcbiTaxId=9606
nxp:NX_Q07866-5	616	0	69905.4	8	35	0.138	Kinesin light chain 1 isoform K \Gname=KLC1 \NcbiTaxId=9606
nxp:NX_Q07866-6	628	0	70943.9	8	35	0.1354	Kinesin light chain 1 isoform N \Gname=KLC1 \NcbiTaxId=9606
nxp:NX_Q07866-7	584	0	66232.4	8	35	0.1455	Kinesin light chain 1 isoform P \Gname=KLC1 \NcbiTaxId=9606
nxp:NX_Q07866-8	551	0	62768.7	8	35	0.1543	Kinesin light chain 1 isoform S \Gname=KLC1 \NcbiTaxId=9606
nxp:NX_Q07866-9	639	0	72334.7	8	35	0.133	Kinesin light chain 1 isoform I \Gname=KLC1 \NcbiTaxId=9606
nxp:NX_Q08495-3	358	0	40636.8	8	45	0.2821	Dematin isoform Iso 3 \Gname=DMTN \NcbiTaxId=9606
nxp:NX_Q0ZGT2-3	613	0	73064.9	8	19	0.1289	Nexilin isoform Iso 3 \Gname=NEXN \NcbiTaxId=9606
nxp:NX_Q13976-1	671	0	76298	8	49	0.1595	cGMP-dependent protein kinase 1 isoform Alpha \Gname=PRKG1 \NcbiTaxId=9606
nxp:NX_Q14165-1	292	8	32195.6	8	80	0.3219	Malectin isoform Iso 1 \Gname=MLEC \NcbiTaxId=9606
nxp:NX_Q14764-1	893	8	99247.9	8	14	0.1176	Major vault protein isoform Iso 1 \Gname=MVP \NcbiTaxId=9606
nxp:NX_Q14C86-1	1478	0	164858.5	8	26	0.0812	GTPase-activating protein and VPS9 domain-containing protein 1 isoform Iso 1 \Gname=GAPVD1 \NcbiTaxId=9606
nxp:NX_Q14C86-2	1460	0	162777.5	8	26	0.0822	GTPase-activating protein and VPS9 domain-containing protein 1 isoform Iso 2 \Gname=GAPVD1 \NcbiTaxId=9606
nxp:NX_Q14C86-4	1439	0	160487.4	8	26	0.0834	GTPase-activating protein and VPS9 domain-containing protein 1 isoform Iso 4 \Gname=GAPVD1 \NcbiTaxId=9606
nxp:NX_Q14C86-5	1452	0	162111.2	8	26	0.0826	GTPase-activating protein and VPS9 domain-containing protein 1 isoform Iso 5 \Gname=GAPVD1 \NcbiTaxId=9606
nxp:NX_Q14C86-6	1487	0	166046.1	8	26	0.0807	GTPase-activating protein and VPS9 domain-containing protein 1 isoform Iso 6 \Gname=GAPVD1 \NcbiTaxId=9606
nxp:NX_Q15185-1	160	8	18667.4	8	56	0.3875	Prostaglandin E synthase 3 isoform Iso 1 \Gname=PTGES3 \NcbiTaxId=9606
nxp:NX_Q15257-1	358	0	40623.4	8	72	0.2542	Serine/threonine-protein phosphatase 2A activator isoform Iso 2 \Gname=PPP2R4 \NcbiTaxId=9606
nxp:NX_Q15257-2	323	0	36733.7	8	72	0.2817	Serine/threonine-protein phosphatase 2A activator isoform Iso 1 \Gname=PPP2R4 \NcbiTaxId=9606
nxp:NX_Q15257-3	294	0	33428	8	72	0.3095	Serine/threonine-protein phosphatase 2A activator isoform Iso 3 \Gname=PPP2R4 \NcbiTaxId=9606
nxp:NX_Q15762-1	336	8	38571.3	8	89	0.3185	CD226 antigen isoform Iso 1 \Gname=CD226 \NcbiTaxId=9606
nxp:NX_Q16539-3	297	0	34051.7	8	29	0.2828	Mitogen-activated protein kinase 14 isoform Mxi2 \Gname=MAPK14 \NcbiTaxId=9606
nxp:NX_Q16836-1	314	0	34253.9	8	35	0.2389	Hydroxyacyl-coenzyme A dehydrogenase. mitochondrial isoform Iso 1 \Gname=HADH \NcbiTaxId=9606
nxp:NX_Q16836-2	390	0	42094.8	8	35	0.1923	Hydroxyacyl-coenzyme A dehydrogenase. mitochondrial isoform Iso 3 \Gname=HADH \NcbiTaxId=9606
nxp:NX_Q53GQ0-1	312	8	34284.2	8	95	0.2436	Estradiol 17-beta-dehydrogenase 12 isoform Iso 1 \Gname=HSD17B12 \NcbiTaxId=9606
nxp:NX_Q6XQN6-2	567	0	60235.4	8	39	0.2152	Nicotinate phosphoribosyltransferase isoform Iso 2 \Gname=NAPRT1 \NcbiTaxId=9606
nxp:NX_Q709C8-1	3753	0	422105.7	8	19	0.0256	Vacuolar protein sorting-associated protein 13C isoform Iso 1 \Gname=VPS13C \NcbiTaxId=9606
nxp:NX_Q709C8-3	3710	0	416994.9	8	19	0.0259	Vacuolar protein sorting-associated protein 13C isoform Iso 3 \Gname=VPS13C \NcbiTaxId=9606
nxp:NX_Q7Z434-1	540	8	56475.1	8	68	0.2593	Mitochondrial antiviral-signaling protein isoform Iso 4 \Gname=MAVS \NcbiTaxId=9606
nxp:NX_Q86UP2-1	1357	0	156161.3	8	20	0.0825	Kinectin isoform Iso 1 \Gname=KTN1 \NcbiTaxId=9606
nxp:NX_Q86UP2-3	1306	0	150242.1	8	20	0.0858	Kinectin isoform Iso 3 \Gname=KTN1 \NcbiTaxId=9606
nxp:NX_Q8IZP0-1	508	0	55028.7	8	46	0.1358	Abl interactor 1 isoform Iso 1 \Gname=ABI1 \NcbiTaxId=9606
nxp:NX_Q8IZP0-10	388	0	42623.3	8	46	0.1778	Abl interactor 1 isoform Iso 10 \Gname=ABI1 \NcbiTaxId=9606
nxp:NX_Q8IZP0-2	446	0	48630.1	8	46	0.1547	Abl interactor 1 isoform Iso 2 \Gname=ABI1 \NcbiTaxId=9606
nxp:NX_Q8IZP0-3	452	0	49327.6	8	46	0.1527	Abl interactor 1 isoform Iso 3 \Gname=ABI1 \NcbiTaxId=9606
nxp:NX_Q8IZP0-4	451	0	49256.5	8	46	0.153	Abl interactor 1 isoform Iso 4 \Gname=ABI1 \NcbiTaxId=9606
nxp:NX_Q8IZP0-5	476	0	51790.9	8	46	0.145	Abl interactor 1 isoform Iso 5 \Gname=ABI1 \NcbiTaxId=9606
nxp:NX_Q8IZP0-6	480	0	52346.2	8	46	0.1438	Abl interactor 1 isoform Iso 6 \Gname=ABI1 \NcbiTaxId=9606
nxp:NX_Q8IZP0-7	422	0	46339.4	8	46	0.1635	Abl interactor 1 isoform Iso 7 \Gname=ABI1 \NcbiTaxId=9606
nxp:NX_Q8IZP0-8	393	0	43263.7	8	46	0.1756	Abl interactor 1 isoform Iso 8 \Gname=ABI1 \NcbiTaxId=9606
nxp:NX_Q8IZP0-9	481	0	52417.2	8	46	0.1435	Abl interactor 1 isoform Iso 9 \Gname=ABI1 \NcbiTaxId=9606
nxp:NX_Q8IZP2-1	240	0	27371.7	8	76	0.2958	Putative protein FAM10A4 isoform Iso 1 \Gname=ST13P4 \NcbiTaxId=9606
nxp:NX_Q93008-1	2554	0	290259.7	8	31	0.0317	Probable ubiquitin carboxyl-terminal hydrolase FAF-X isoform Iso 2 \Gname=USP9X \NcbiTaxId=9606
nxp:NX_Q93008-3	2570	0	292075.6	8	31	0.0315	Probable ubiquitin carboxyl-terminal hydrolase FAF-X isoform Iso 1 \Gname=USP9X \NcbiTaxId=9606
nxp:NX_Q95604-1	372	1	41194.6	8	48	0.25	HLA class I histocompatibility antigen. Cw-17 alpha chain isoform Iso 1 \Gname=HLA-C \NcbiTaxId=9606
nxp:NX_Q96AG4-1	307	8	34890.9	8	157	0.2866	Leucine-rich repeat-containing protein 59 isoform Iso 1 \Gname=LRRC59 \NcbiTaxId=9606
nxp:NX_Q96CN7-1	298	8	32198.1	8	113	0.3188	Isochorismatase domain-containing protein 1 isoform Iso 1 \Gname=ISOC1 \NcbiTaxId=9606
nxp:NX_Q9BT78-2	352	0	40153.7	8	40	0.2926	COP9 signalosome complex subunit 4 isoform Iso 2 \Gname=COPS4 \NcbiTaxId=9606
nxp:NX_Q9BWD1-1	397	8	41306.4	8	46	0.2872	Acetyl-CoA acetyltransferase. cytosolic isoform Iso 1 \Gname=ACAT2 \NcbiTaxId=9606
nxp:NX_Q9H2K8-1	898	7	105321.7	8	33	0.0813	Serine/threonine-protein kinase TAO3 isoform Iso 1 \Gname=TAOK3 \NcbiTaxId=9606
nxp:NX_Q9H7D0-1	1870	8	215154	8	22	0.0465	Dedicator of cytokinesis protein 5 isoform Iso 2 \Gname=DOCK5 \NcbiTaxId=9606
nxp:NX_Q9HC38-2	298	7	33193.5	8	78	0.2517	Glyoxalase domain-containing protein 4 isoform Iso 2 \Gname=GLOD4 \NcbiTaxId=9606
nxp:NX_Q9NQW7-2	599	0	67165.9	8	121	0.1469	Xaa-Pro aminopeptidase 1 isoform Iso 2 \Gname=XPNPEP1 \NcbiTaxId=9606
nxp:NX_Q9NRW1-1	208	4	23428.9	8	46	0.2308	Ras-related protein Rab-6B isoform Iso 1 \Gname=RAB6B \NcbiTaxId=9606
nxp:NX_Q9P289-1	416	3	46481.6	8	16	0.1995	Serine/threonine-protein kinase MST4 isoform Iso 1 \Gname=MST4 \NcbiTaxId=9606
nxp:NX_Q9UDT6-1	1046	0	115748.9	8	36	0.0975	CAP-Gly domain-containing linker protein 2 isoform Iso 1 \Gname=CLIP2 \NcbiTaxId=9606
nxp:NX_Q9UDT6-2	1011	0	111695.8	8	36	0.1009	CAP-Gly domain-containing linker protein 2 isoform Iso 2 \Gname=CLIP2 \NcbiTaxId=9606
nxp:NX_Q9UEY8-1	706	0	79087.2	8	40	0.1161	Gamma-adducin isoform Iso 2 \Gname=ADD3 \NcbiTaxId=9606
nxp:NX_Q9UEY8-2	674	0	75605.5	8	40	0.1217	Gamma-adducin isoform Iso 1 \Gname=ADD3 \NcbiTaxId=9606
nxp:NX_Q9UIJ7-3	187	0	20983.1	8	49	0.4171	GTP:AMP phosphotransferase AK3. mitochondrial isoform Iso 3 \Gname=AK3 \NcbiTaxId=9606
nxp:NX_Q9UNF0-1	486	0	55685.9	8	92	0.1749	Protein kinase C and casein kinase substrate in neurons protein 2 isoform Iso 1 \Gname=PACSIN2 \NcbiTaxId=9606
nxp:NX_Q9UNF0-2	445	0	51303	8	92	0.191	Protein kinase C and casein kinase substrate in neurons protein 2 isoform Iso 2 \Gname=PACSIN2 \NcbiTaxId=9606
nxp:NX_Q9UNF1-1	606	3	64896.3	8	56	0.1601	Melanoma-associated antigen D2 isoform Iso 1 \Gname=MAGED2 \NcbiTaxId=9606
nxp:NX_Q9UNZ2-4	339	0	37284.8	8	41	0.2566	NSFL1 cofactor p47 isoform Iso 2 \Gname=NSFL1C \NcbiTaxId=9606
nxp:NX_Q9UNZ2-6	259	0	28486.7	8	40	0.3668	NSFL1 cofactor p47 isoform Iso 4 \Gname=NSFL1C \NcbiTaxId=9606
nxp:NX_Q9UPN3-2	5430	0	620015.5	8	13	0.0175	Microtubule-actin cross-linking factor 1. isoforms 1/2/3/5 isoform Iso 2 \Gname=MACF1 \NcbiTaxId=9606
nxp:NX_Q9UPN3-3	5374	0	613753.6	8	13	0.0177	Microtubule-actin cross-linking factor 1. isoforms 1/2/3/5 isoform Iso 3 \Gname=MACF1 \NcbiTaxId=9606
nxp:NX_Q9UPN3-4	5300	0	605769.4	8	13	0.0179	Microtubule-actin cross-linking factor 1. isoforms 1/2/3/5 isoform Iso 5 \Gname=MACF1 \NcbiTaxId=9606
nxp:NX_Q9Y265-1	456	8	50178.3	8	67	0.2061	RuvB-like 1 isoform Iso 1 \Gname=RUVBL1 \NcbiTaxId=9606
nxp:NX_Q9Y4D1-3	882	0	100662.9	8	31	0.0975	Disheveled-associated activator of morphogenesis 1 isoform Iso 3 \Gname=DAAM1 \NcbiTaxId=9606
nxp:NX_Q9Y6C9-1	303	8	33290.9	8	48	0.2904	Mitochondrial carrier homolog 2 isoform Iso 1 \Gname=MTCH2 \NcbiTaxId=9606
nxp:NX_B5ME19-1	914	0	105388.8	7	27	0.0766	Eukaryotic translation initiation factor 3 subunit C-like protein isoform Iso 1 \Gname=EIF3CL \NcbiTaxId=9606
nxp:NX_O00161-2	158	0	17759.8	7	26	0.3354	Synaptosomal-associated protein 23 isoform SNAP-23b \Gname=SNAP23 \NcbiTaxId=9606
nxp:NX_O00186-1	592	7	67702.8	7	52	0.1301	Syntaxin-binding protein 3 isoform Iso 1 \Gname=STXBP3 \NcbiTaxId=9606
nxp:NX_O14828-1	347	2	38244.3	7	13	0.2767	Secretory carrier-associated membrane protein 3 isoform Iso 1 \Gname=SCAMP3 \NcbiTaxId=9606
nxp:NX_O15400-1	261	0	29779.3	7	155	0.3295	Syntaxin-7 isoform Iso 1 \Gname=STX7 \NcbiTaxId=9606
nxp:NX_O15400-2	239	0	27365.6	7	155	0.3598	Syntaxin-7 isoform Iso 2 \Gname=STX7 \NcbiTaxId=9606
nxp:NX_O43149-1	2961	7	330845.5	7	21	0.0314	Zinc finger ZZ-type and EF-hand domain-containing protein 1 isoform Iso 1 \Gname=ZZEF1 \NcbiTaxId=9606
nxp:NX_O43516-2	493	0	50232.7	7	12	0.1927	WAS/WASL-interacting protein family member 1 isoform Iso 2 \Gname=WIPF1 \NcbiTaxId=9606
nxp:NX_O43516-3	510	0	51930.7	7	12	0.1863	WAS/WASL-interacting protein family member 1 isoform Iso 1 \Gname=WIPF1 \NcbiTaxId=9606
nxp:NX_O43516-4	358	0	36385.7	7	12	0.2654	WAS/WASL-interacting protein family member 1 isoform Iso 4 \Gname=WIPF1 \NcbiTaxId=9606
nxp:NX_O43681-1	348	7	38749.4	7	95	0.1983	ATPase ASNA1 isoform Iso 1 \Gname=ASNA1 \NcbiTaxId=9606
nxp:NX_O43747-1	822	0	91275.1	7	58	0.0815	AP-1 complex subunit gamma-1 isoform Iso 1 \Gname=AP1G1 \NcbiTaxId=9606
nxp:NX_O43747-2	825	0	91646.3	7	58	0.0812	AP-1 complex subunit gamma-1 isoform Iso 2 \Gname=AP1G1 \NcbiTaxId=9606
nxp:NX_O60493-1	162	4	18732.7	7	37	0.321	Sorting nexin-3 isoform Iso 1 \Gname=SNX3 \NcbiTaxId=9606
nxp:NX_O60506-5	410	0	46281.2	7	18	0.1829	Heterogeneous nuclear ribonucleoprotein Q isoform Iso 5 \Gname=SYNCRIP \NcbiTaxId=9606
nxp:NX_O95834-1	649	0	70616.1	7	43	0.1217	Echinoderm microtubule-associated protein-like 2 isoform Iso 1 \Gname=EML2 \NcbiTaxId=9606
nxp:NX_O95834-2	796	0	86398.3	7	43	0.0992	Echinoderm microtubule-associated protein-like 2 isoform Iso 2 \Gname=EML2 \NcbiTaxId=9606
nxp:NX_O95834-3	850	0	91994	7	43	0.0929	Echinoderm microtubule-associated protein-like 2 isoform Iso 3 \Gname=EML2 \NcbiTaxId=9606
nxp:NX_P01111-1	189	3	21197.5	7	12	0.3862	GTPase NRas isoform Iso 1 \Gname=NRAS \NcbiTaxId=9606
nxp:NX_P01112-1	189	0	21266.5	7	28	0.3386	GTPase HRas isoform Iso 1 \Gname=HRAS \NcbiTaxId=9606
nxp:NX_P01859-1	326	2	35859.7	7	89	0.273	Ig gamma-2 chain C region isoform Iso 1 \Gname=IGHG2 \NcbiTaxId=9606
nxp:NX_P01876-1	353	7	37612.6	7	42	0.2493	Ig alpha-1 chain C region isoform Iso 1 \Gname=IGHA1 \NcbiTaxId=9606
nxp:NX_P02649-1	317	7	36113.7	7	48	0.2587	Apolipoprotein E isoform Iso 1 \Gname=APOE \NcbiTaxId=9606
nxp:NX_P06132-1	367	7	40742.8	7	43	0.158	Uroporphyrinogen decarboxylase isoform Iso 1 \Gname=UROD \NcbiTaxId=9606
nxp:NX_P07602-1	524	0	58055.8	7	34	0.124	Proactivator polypeptide isoform Sap-mu-0 \Gname=PSAP \NcbiTaxId=9606
nxp:NX_P07602-2	526	0	58298.9	7	34	0.1236	Proactivator polypeptide isoform Sap-mu-6 \Gname=PSAP \NcbiTaxId=9606
nxp:NX_P07602-3	527	0	58427	7	34	0.1233	Proactivator polypeptide isoform Sap-mu-9 \Gname=PSAP \NcbiTaxId=9606
nxp:NX_P08754-1	354	1	40488.3	7	49	0.2034	Guanine nucleotide-binding protein G(k) subunit alpha isoform Iso 1 \Gname=GNAI3 \NcbiTaxId=9606
nxp:NX_P09493-6	284	0	32611.6	7	10	0.2183	Tropomyosin alpha-1 chain isoform Iso 6 \Gname=TPM1 \NcbiTaxId=9606
nxp:NX_P09493-7	284	0	32639.6	7	10	0.2183	Tropomyosin alpha-1 chain isoform Iso 7 \Gname=TPM1 \NcbiTaxId=9606
nxp:NX_P09496-1	248	0	27042	7	98	0.25	Clathrin light chain A isoform Brain \Gname=CLTA \NcbiTaxId=9606
nxp:NX_P09496-2	218	0	23629.4	7	98	0.2844	Clathrin light chain A isoform Non-brain \Gname=CLTA \NcbiTaxId=9606
nxp:NX_P09496-3	236	0	25642.4	7	98	0.2627	Clathrin light chain A isoform Iso 3 \Gname=CLTA \NcbiTaxId=9606
nxp:NX_P09496-4	230	0	24960	7	98	0.2696	Clathrin light chain A isoform Iso 4 \Gname=CLTA \NcbiTaxId=9606
nxp:NX_P0C7P3-1	912	0	103822.2	7	41	0.0691	Schlafen family member 14 isoform Iso 1 \Gname=SLFN14 \NcbiTaxId=9606
nxp:NX_P0C7P3-2	896	0	102174.5	7	41	0.0703	Schlafen family member 14 isoform Iso 2 \Gname=SLFN14 \NcbiTaxId=9606
nxp:NX_P10599-2	85	0	9427.7	7	50	0.4941	Thioredoxin isoform Iso 2 \Gname=TXN \NcbiTaxId=9606
nxp:NX_P10720-1	104	2	11527.3	7	96	0.3462	Platelet factor 4 variant isoform Iso 1 \Gname=PF4V1 \NcbiTaxId=9606
nxp:NX_P11217-2	754	0	87244	7	13	0.0928	Glycogen phosphorylase. muscle form isoform Iso 2 \Gname=PYGM \NcbiTaxId=9606
nxp:NX_P16278-2	546	0	60479.6	7	18	0.1648	Beta-galactosidase isoform Iso 2 \Gname=GLB1 \NcbiTaxId=9606
nxp:NX_P18462-1	365	0	41174.2	7	15	0.2329	HLA class I histocompatibility antigen. A-25 alpha chain isoform Iso 1 \Gname=HLA-A \NcbiTaxId=9606
nxp:NX_P20339-1	215	4	23625.8	7	29	0.4233	Ras-related protein Rab-5A isoform Iso 1 \Gname=RAB5A \NcbiTaxId=9606
nxp:NX_P20674-1	150	7	16733.7	7	130	0.3667	Cytochrome c oxidase subunit 5A. mitochondrial isoform Iso 1 \Gname=COX5A \NcbiTaxId=9606
nxp:NX_P21964-1	271	7	29999.6	7	31	0.3875	Catechol O-methyltransferase isoform Soluble \Gname=COMT \NcbiTaxId=9606
nxp:NX_P22694-10	321	0	36937.8	7	27	0.2243	cAMP-dependent protein kinase catalytic subunit beta isoform Iso 10 \Gname=PRKACB \NcbiTaxId=9606
nxp:NX_P23381-1	471	7	53113.6	7	36	0.155	Tryptophan--tRNA ligase. cytoplasmic isoform Iso 2 \Gname=WARS \NcbiTaxId=9606
nxp:NX_P24534-1	225	6	24730.3	7	67	0.4133	Elongation factor 1-beta isoform Iso 1 \Gname=EEF1B2 \NcbiTaxId=9606
nxp:NX_P24539-1	256	7	28872.3	7	118	0.2852	ATP synthase subunit b. mitochondrial isoform Iso 1 \Gname=ATP5F1 \NcbiTaxId=9606
nxp:NX_P25789-1	261	7	29447.2	7	123	0.3142	Proteasome subunit alpha type-4 isoform Iso 2 \Gname=PSMA4 \NcbiTaxId=9606
nxp:NX_P26440-1	423	6	46271.6	7	90	0.1844	Isovaleryl-CoA dehydrogenase. mitochondrial isoform Iso 1 \Gname=IVD \NcbiTaxId=9606
nxp:NX_P26599-1	531	0	57167.6	7	51	0.2298	Polypyrimidine tract-binding protein 1 isoform Iso 1 \Gname=PTBP1 \NcbiTaxId=9606
nxp:NX_P26599-2	550	0	58982.5	7	51	0.2218	Polypyrimidine tract-binding protein 1 isoform Iso 2 \Gname=PTBP1 \NcbiTaxId=9606
nxp:NX_P26599-3	557	0	59577.9	7	51	0.219	Polypyrimidine tract-binding protein 1 isoform Iso 3 \Gname=PTBP1 \NcbiTaxId=9606
nxp:NX_P27708-1	2225	7	242811.4	7	42	0.0337	CAD protein isoform Iso 1 \Gname=CAD \NcbiTaxId=9606
nxp:NX_P28331-2	741	0	80927.4	7	53	0.1363	NADH-ubiquinone oxidoreductase 75 kDa subunit. mitochondrial isoform Iso 4 \Gname=NDUFS1 \NcbiTaxId=9606
nxp:NX_P28331-3	616	0	67463.2	7	53	0.164	NADH-ubiquinone oxidoreductase 75 kDa subunit. mitochondrial isoform Iso 3 \Gname=NDUFS1 \NcbiTaxId=9606
nxp:NX_P28331-5	691	0	75308.5	7	53	0.1462	NADH-ubiquinone oxidoreductase 75 kDa subunit. mitochondrial isoform Iso 5 \Gname=NDUFS1 \NcbiTaxId=9606
nxp:NX_P30450-1	365	0	41018.1	7	15	0.2329	HLA class I histocompatibility antigen. A-26 alpha chain isoform Iso 1 \Gname=HLA-A \NcbiTaxId=9606
nxp:NX_P30479-1	362	0	40496	7	23	0.2403	HLA class I histocompatibility antigen. B-41 alpha chain isoform Iso 1 \Gname=HLA-B \NcbiTaxId=9606
nxp:NX_P30501-1	366	0	41051.3	7	25	0.2514	HLA class I histocompatibility antigen. Cw-2 alpha chain isoform Iso 1 \Gname=HLA-C \NcbiTaxId=9606
nxp:NX_P30626-1	198	0	21644.3	7	110	0.3737	Sorcin isoform Iso 1 \Gname=SRI \NcbiTaxId=9606
nxp:NX_P30626-2	183	0	20313.8	7	110	0.4044	Sorcin isoform Iso 2 \Gname=SRI \NcbiTaxId=9606
nxp:NX_P35813-2	324	0	35916.5	7	42	0.3302	Protein phosphatase 1A isoform Alpha-2 \Gname=PPM1A \NcbiTaxId=9606
nxp:NX_P35914-1	325	7	34319.8	7	69	0.2554	Hydroxymethylglutaryl-CoA lyase. mitochondrial isoform Iso 1 \Gname=HMGCL \NcbiTaxId=9606
nxp:NX_P39656-1	456	7	50751	7	172	0.1952	Dolichyl-diphosphooligosaccharide--protein glycosyltransferase 48 kDa subunit isoform Iso 1 \Gname=DDOST \NcbiTaxId=9606
nxp:NX_P42892-2	758	0	85735.7	7	58	0.1214	Endothelin-converting enzyme 1 isoform A \Gname=ECE1 \NcbiTaxId=9606
nxp:NX_P43034-1	410	7	46590.1	7	90	0.2024	Platelet-activating factor acetylhydrolase IB subunit alpha isoform Iso 1 \Gname=PAFAH1B1 \NcbiTaxId=9606
nxp:NX_P46977-1	705	7	80458.8	7	31	0.0752	Dolichyl-diphosphooligosaccharide--protein glycosyltransferase subunit STT3A isoform Iso 1 \Gname=STT3A \NcbiTaxId=9606
nxp:NX_P48637-1	474	5	52334.2	7	23	0.1498	Glutathione synthetase isoform Iso 1 \Gname=GSS \NcbiTaxId=9606
nxp:NX_P49773-1	126	7	13775.1	7	77	0.4206	Histidine triad nucleotide-binding protein 1 isoform Iso 1 \Gname=HINT1 \NcbiTaxId=9606
nxp:NX_P50402-1	254	7	28957.9	7	46	0.2677	Emerin isoform Iso 1 \Gname=EMD \NcbiTaxId=9606
nxp:NX_P51148-2	249	4	27000.5	7	134	0.3574	Ras-related protein Rab-5C isoform Iso 1 \Gname=RAB5C \NcbiTaxId=9606
nxp:NX_P54578-1	494	0	56015	7	32	0.1296	Ubiquitin carboxyl-terminal hydrolase 14 isoform Iso 1 \Gname=USP14 \NcbiTaxId=9606
nxp:NX_P54578-2	459	0	52334.3	7	32	0.1394	Ubiquitin carboxyl-terminal hydrolase 14 isoform Iso 2 \Gname=USP14 \NcbiTaxId=9606
nxp:NX_P60842-1	406	4	46106.5	7	112	0.202	Eukaryotic initiation factor 4A-I isoform Iso 1 \Gname=EIF4A1 \NcbiTaxId=9606
nxp:NX_P60900-1	246	7	27363.8	7	113	0.3415	Proteasome subunit alpha type-6 isoform Iso 1 \Gname=PSMA6 \NcbiTaxId=9606
nxp:NX_P61163-1	376	7	42568.9	7	111	0.2447	Alpha-centractin isoform Iso 1 \Gname=ACTR1A \NcbiTaxId=9606
nxp:NX_P62491-2	155	0	17630.1	7	23	0.4968	Ras-related protein Rab-11A isoform Iso 2 \Gname=RAB11A \NcbiTaxId=9606
nxp:NX_P63096-1	354	0	40317.2	7	41	0.1893	Guanine nucleotide-binding protein G(i) subunit alpha-1 isoform Iso 2 \Gname=GNAI1 \NcbiTaxId=9606
nxp:NX_P63241-2	184	0	20139.2	7	150	0.1739	Eukaryotic translation initiation factor 5A-1 isoform Iso 1 \Gname=EIF5A \NcbiTaxId=9606
nxp:NX_P98171-1	946	0	104942.4	7	19	0.1078	Rho GTPase-activating protein 4 isoform Iso 1 \Gname=ARHGAP4 \NcbiTaxId=9606
nxp:NX_P98171-2	986	0	109306.5	7	19	0.1034	Rho GTPase-activating protein 4 isoform Iso 2 \Gname=ARHGAP4 \NcbiTaxId=9606
nxp:NX_Q00325-1	362	0	40050.7	7	14	0.1464	Phosphate carrier protein. mitochondrial isoform A \Gname=SLC25A3 \NcbiTaxId=9606
nxp:NX_Q00688-1	224	7	25143.3	7	34	0.2946	Peptidyl-prolyl cis-trans isomerase FKBP3 isoform Iso 1 \Gname=FKBP3 \NcbiTaxId=9606
nxp:NX_Q04637-1	1599	0	175364.3	7	38	0.0557	Eukaryotic translation initiation factor 4 gamma 1 isoform E \Gname=EIF4G1 \NcbiTaxId=9606
nxp:NX_Q04637-8	1600	0	175492.3	7	38	0.0556	Eukaryotic translation initiation factor 4 gamma 1 isoform Iso 7 \Gname=EIF4G1 \NcbiTaxId=9606
nxp:NX_Q04637-9	1606	0	176109.6	7	38	0.0554	Eukaryotic translation initiation factor 4 gamma 1 isoform Iso 9 \Gname=EIF4G1 \NcbiTaxId=9606
nxp:NX_Q05397-1	1052	0	119139.3	7	41	0.0846	Focal adhesion kinase 1 isoform Iso 6 \Gname=PTK2 \NcbiTaxId=9606
nxp:NX_Q05397-2	879	0	99277	7	41	0.1013	Focal adhesion kinase 1 isoform Iso 2 \Gname=PTK2 \NcbiTaxId=9606
nxp:NX_Q05397-5	1065	0	120805.1	7	41	0.0836	Focal adhesion kinase 1 isoform Iso 5 \Gname=PTK2 \NcbiTaxId=9606
nxp:NX_Q07021-1	282	7	31324.6	7	40	0.227	Complement component 1 Q subcomponent-binding protein. mitochondrial isoform Iso 1 \Gname=C1QBP \NcbiTaxId=9606
nxp:NX_Q13011-1	328	7	35775.4	7	98	0.2348	Delta(3.5)-Delta(2.4)-dienoyl-CoA isomerase. mitochondrial isoform Iso 1 \Gname=ECH1 \NcbiTaxId=9606
nxp:NX_Q13043-1	487	3	55576.9	7	32	0.1807	Serine/threonine-protein kinase 4 isoform Iso 1 \Gname=STK4 \NcbiTaxId=9606
nxp:NX_Q13098-4	491	0	55483.2	7	39	0.1609	COP9 signalosome complex subunit 1 isoform Iso 1 \Gname=GPS1 \NcbiTaxId=9606
nxp:NX_Q13098-5	487	0	55039.9	7	39	0.1622	COP9 signalosome complex subunit 1 isoform Iso 4 \Gname=GPS1 \NcbiTaxId=9606
nxp:NX_Q13098-7	527	0	58994.6	7	39	0.1499	COP9 signalosome complex subunit 1 isoform Iso 2 \Gname=GPS1 \NcbiTaxId=9606
nxp:NX_Q13884-2	382	0	40762.3	7	37	0.2435	Beta-1-syntrophin isoform Iso 2 \Gname=SNTB1 \NcbiTaxId=9606
nxp:NX_Q14240-1	407	0	46354.8	7	106	0.2064	Eukaryotic initiation factor 4A-II isoform Iso 1 \Gname=EIF4A2 \NcbiTaxId=9606
nxp:NX_Q14240-2	408	0	46441.8	7	106	0.2059	Eukaryotic initiation factor 4A-II isoform Iso 2 \Gname=EIF4A2 \NcbiTaxId=9606
nxp:NX_Q14C86-3	1433	0	159636.8	7	25	0.074	GTPase-activating protein and VPS9 domain-containing protein 1 isoform Iso 3 \Gname=GAPVD1 \NcbiTaxId=9606
nxp:NX_Q15366-1	365	0	38537.6	7	133	0.2603	Poly(rC)-binding protein 2 isoform Iso 1 \Gname=PCBP2 \NcbiTaxId=9606
nxp:NX_Q15366-2	366	0	38608.6	7	133	0.2596	Poly(rC)-binding protein 2 isoform Iso 2 \Gname=PCBP2 \NcbiTaxId=9606
nxp:NX_Q15436-1	765	7	86087.2	7	25	0.0954	Protein transport protein Sec23A isoform Iso 1 \Gname=SEC23A \NcbiTaxId=9606
nxp:NX_Q15642-1	601	0	68292.2	7	81	0.1414	Cdc42-interacting protein 4 isoform Iso 1 \Gname=TRIP10 \NcbiTaxId=9606
nxp:NX_Q15642-2	545	0	62535	7	81	0.156	Cdc42-interacting protein 4 isoform Iso 2 \Gname=TRIP10 \NcbiTaxId=9606
nxp:NX_Q15642-3	593	0	67542.9	7	81	0.1433	Cdc42-interacting protein 4 isoform Iso 3 \Gname=TRIP10 \NcbiTaxId=9606
nxp:NX_Q15642-4	456	0	52649.6	7	81	0.1864	Cdc42-interacting protein 4 isoform Iso 4 \Gname=TRIP10 \NcbiTaxId=9606
nxp:NX_Q29960-1	366	0	40709.1	7	17	0.1967	HLA class I histocompatibility antigen. Cw-16 alpha chain isoform Iso 1 \Gname=HLA-C \NcbiTaxId=9606
nxp:NX_Q29960-2	326	0	36756.8	7	17	0.2209	HLA class I histocompatibility antigen. Cw-16 alpha chain isoform Iso 2 \Gname=HLA-C \NcbiTaxId=9606
nxp:NX_Q31612-1	363	0	40391.9	7	27	0.2094	HLA class I histocompatibility antigen. B-73 alpha chain isoform Iso 1 \Gname=HLA-B \NcbiTaxId=9606
nxp:NX_Q684P5-1	730	0	79987.9	7	34	0.1068	Rap1 GTPase-activating protein 2 isoform Iso 3 \Gname=RAP1GAP2 \NcbiTaxId=9606
nxp:NX_Q684P5-2	715	0	78313	7	34	0.1091	Rap1 GTPase-activating protein 2 isoform Iso 2 \Gname=RAP1GAP2 \NcbiTaxId=9606
nxp:NX_Q6IS14-1	154	0	16744.3	7	150	0.2078	Eukaryotic translation initiation factor 5A-1-like isoform Iso 1 \Gname=EIF5AL1 \NcbiTaxId=9606
nxp:NX_Q6XQN6-3	525	0	56046.2	7	26	0.1524	Nicotinate phosphoribosyltransferase isoform Iso 3 \Gname=NAPRT1 \NcbiTaxId=9606
nxp:NX_Q709C8-2	3628	0	407923.3	7	12	0.0232	Vacuolar protein sorting-associated protein 13C isoform Iso 2 \Gname=VPS13C \NcbiTaxId=9606
nxp:NX_Q709C8-4	3585	0	402812.5	7	12	0.0234	Vacuolar protein sorting-associated protein 13C isoform Iso 4 \Gname=VPS13C \NcbiTaxId=9606
nxp:NX_Q7Z6Z7-1	4374	0	481570.6	7	13	0.0185	E3 ubiquitin-protein ligase HUWE1 isoform Iso 1 \Gname=HUWE1 \NcbiTaxId=9606
nxp:NX_Q7Z6Z7-2	4358	0	479878.8	7	13	0.0186	E3 ubiquitin-protein ligase HUWE1 isoform Iso 2 \Gname=HUWE1 \NcbiTaxId=9606
nxp:NX_Q7Z6Z7-3	4365	0	480698.2	7	13	0.0186	E3 ubiquitin-protein ligase HUWE1 isoform Iso 3 \Gname=HUWE1 \NcbiTaxId=9606
nxp:NX_Q86TP1-2	386	0	42410.6	7	30	0.2202	Protein prune homolog isoform Iso 7 \Gname=PRUNE \NcbiTaxId=9606
nxp:NX_Q86UP2-2	1300	0	149500.9	7	18	0.0708	Kinectin isoform Iso 2 \Gname=KTN1 \NcbiTaxId=9606
nxp:NX_Q86WI1-1	4243	7	465421.2	7	17	0.0222	Fibrocystin-L isoform Iso 1 \Gname=PKHD1L1 \NcbiTaxId=9606
nxp:NX_Q8IY22-1	773	0	86257.1	7	48	0.1125	C-Maf-inducing protein isoform Iso 1 \Gname=CMIP \NcbiTaxId=9606
nxp:NX_Q8IY22-2	679	0	75965.7	7	48	0.1281	C-Maf-inducing protein isoform Iso 2 \Gname=CMIP \NcbiTaxId=9606
nxp:NX_Q8IY22-3	620	0	69225.5	7	48	0.1403	C-Maf-inducing protein isoform Iso 3 \Gname=CMIP \NcbiTaxId=9606
nxp:NX_Q8WXE9-1	905	0	101083.5	7	51	0.1061	Stonin-2 isoform Iso 1 \Gname=STON2 \NcbiTaxId=9606
nxp:NX_Q8WXE9-3	920	0	102752.3	7	51	0.1043	Stonin-2 isoform Iso 2 \Gname=STON2 \NcbiTaxId=9606
nxp:NX_Q92499-1	740	7	82361.7	7	20	0.1216	ATP-dependent RNA helicase DDX1 isoform Iso 1 \Gname=DDX1 \NcbiTaxId=9606
nxp:NX_Q93052-1	612	5	65685.8	7	23	0.1029	Lipoma-preferred partner isoform Iso 1 \Gname=LPP \NcbiTaxId=9606
nxp:NX_Q969T9-1	261	7	28050.4	7	48	0.2375	WW domain-binding protein 2 isoform Iso 1 \Gname=WBP2 \NcbiTaxId=9606
nxp:NX_Q96CW1-1	435	0	49605	7	31	0.154	AP-2 complex subunit mu isoform Iso 1 \Gname=AP2M1 \NcbiTaxId=9606
nxp:NX_Q96CW1-2	433	0	49339.9	7	31	0.1547	AP-2 complex subunit mu isoform Iso 2 \Gname=AP2M1 \NcbiTaxId=9606
nxp:NX_Q96FW1-1	271	7	31246.4	7	87	0.3137	Ubiquitin thioesterase OTUB1 isoform Iso 1 \Gname=OTUB1 \NcbiTaxId=9606
nxp:NX_Q96IU4-1	210	7	22313.5	7	111	0.3381	Alpha/beta hydrolase domain-containing protein 14B isoform Iso 1 \Gname=ABHD14B \NcbiTaxId=9606
nxp:NX_Q96P48-1	1210	0	136159.9	7	33	0.0802	Arf-GAP with Rho-GAP domain. ANK repeat and PH domain-containing protein 1 isoform Iso 1 \Gname=ARAP1 \NcbiTaxId=9606
nxp:NX_Q96P48-2	1199	0	134963.4	7	33	0.0809	Arf-GAP with Rho-GAP domain. ANK repeat and PH domain-containing protein 1 isoform Iso 2 \Gname=ARAP1 \NcbiTaxId=9606
nxp:NX_Q96P48-7	1133	0	127566.7	7	33	0.0856	Arf-GAP with Rho-GAP domain. ANK repeat and PH domain-containing protein 1 isoform Iso 7 \Gname=ARAP1 \NcbiTaxId=9606
nxp:NX_Q99426-1	244	7	27290.5	7	18	0.2582	Tubulin-folding cofactor B isoform Iso 1 \Gname=TBCB \NcbiTaxId=9606
nxp:NX_Q99613-1	913	0	105259.7	7	27	0.0767	Eukaryotic translation initiation factor 3 subunit C isoform Iso 1 \Gname=EIF3C \NcbiTaxId=9606
nxp:NX_Q99961-1	368	6	41446	7	62	0.1848	Endophilin-A2 isoform Iso 1 \Gname=SH3GL1 \NcbiTaxId=9606
nxp:NX_Q9BWM7-1	325	7	35937.7	7	34	0.2338	Sideroflexin-3 isoform Iso 1 \Gname=SFXN3 \NcbiTaxId=9606
nxp:NX_Q9BXS5-1	423	0	48538	7	83	0.1868	AP-1 complex subunit mu-1 isoform Iso 1 \Gname=AP1M1 \NcbiTaxId=9606
nxp:NX_Q9BXS5-2	435	0	49790.7	7	83	0.1816	AP-1 complex subunit mu-1 isoform Iso 2 \Gname=AP1M1 \NcbiTaxId=9606
nxp:NX_Q9HAV0-1	340	1	37525	7	165	0.2706	Guanine nucleotide-binding protein subunit beta-4 isoform Iso 1 \Gname=GNB4 \NcbiTaxId=9606
nxp:NX_Q9NTK5-1	396	7	44697.3	7	95	0.202	Obg-like ATPase 1 isoform Iso 2 \Gname=OLA1 \NcbiTaxId=9606
nxp:NX_Q9P0L0-1	249	0	27857.2	7	197	0.2249	Vesicle-associated membrane protein-associated protein A isoform Iso 1 \Gname=VAPA \NcbiTaxId=9606
nxp:NX_Q9P0L0-2	294	0	32574.6	7	197	0.1905	Vesicle-associated membrane protein-associated protein A isoform Iso 2 \Gname=VAPA \NcbiTaxId=9606
nxp:NX_Q9P126-1	229	0	26560	7	110	0.2271	C-type lectin domain family 1 member B isoform Iso 1 \Gname=CLEC1B \NcbiTaxId=9606
nxp:NX_Q9P126-2	196	0	23063.1	7	110	0.2653	C-type lectin domain family 1 member B isoform Iso 2 \Gname=CLEC1B \NcbiTaxId=9606
nxp:NX_Q9TNN7-1	366	0	40868.3	7	24	0.1858	HLA class I histocompatibility antigen. Cw-5 alpha chain isoform Iso 1 \Gname=HLA-C \NcbiTaxId=9606
nxp:NX_Q9UBQ7-1	328	7	35627.7	7	50	0.2683	Glyoxylate reductase/hydroxypyruvate reductase isoform Iso 1 \Gname=GRHPR \NcbiTaxId=9606
nxp:NX_Q9UHA4-1	124	7	13596.2	7	36	0.4919	Ragulator complex protein LAMTOR3 isoform Iso 1 \Gname=LAMTOR3 \NcbiTaxId=9606
nxp:NX_Q9UNF1-2	588	0	63110.4	7	53	0.1497	Melanoma-associated antigen D2 isoform Iso 2 \Gname=MAGED2 \NcbiTaxId=9606
nxp:NX_Q9UNM6-1	376	2	42900.1	7	11	0.2181	26S proteasome non-ATPase regulatory subunit 13 isoform Iso 1 \Gname=PSMD13 \NcbiTaxId=9606
nxp:NX_Q9UPN7-1	881	7	96645.7	7	23	0.1203	Serine/threonine-protein phosphatase 6 regulatory subunit 1 isoform Iso 1 \Gname=PPP6R1 \NcbiTaxId=9606
nxp:NX_Q9Y371-1	365	0	40752.8	7	68	0.211	Endophilin-B1 isoform Iso 3 \Gname=SH3GLB1 \NcbiTaxId=9606
nxp:NX_Q9Y371-2	386	0	43151	7	68	0.1995	Endophilin-B1 isoform Iso 2 \Gname=SH3GLB1 \NcbiTaxId=9606
nxp:NX_Q9Y376-1	341	7	39825.7	7	67	0.2082	Calcium-binding protein 39 isoform Iso 1 \Gname=CAB39 \NcbiTaxId=9606
nxp:NX_Q9Y3Q8-1	395	7	40982.9	7	31	0.2456	TSC22 domain family protein 4 isoform Iso 1 \Gname=TSC22D4 \NcbiTaxId=9606
nxp:NX_Q9Y6D6-1	1849	4	208616.5	7	21	0.0384	Brefeldin A-inhibited guanine nucleotide-exchange protein 1 isoform Iso 1 \Gname=ARFGEF1 \NcbiTaxId=9606
nxp:NX_O14556-1	408	1	44454.8	6	25	0.0809	Glyceraldehyde-3-phosphate dehydrogenase. testis-specific isoform Iso 1 \Gname=GAPDHS \NcbiTaxId=9606
nxp:NX_O14618-1	274	6	29004.4	6	34	0.3066	Copper chaperone for superoxide dismutase isoform Iso 1 \Gname=CCS \NcbiTaxId=9606
nxp:NX_O43396-1	289	6	32212.7	6	24	0.2491	Thioredoxin-like protein 1 isoform Iso 1 \Gname=TXNL1 \NcbiTaxId=9606
nxp:NX_O60493-4	140	0	16287.4	6	28	0.3214	Sorting nexin-3 isoform Iso 4 \Gname=SNX3 \NcbiTaxId=9606
nxp:NX_O60496-1	412	6	45332.7	6	76	0.2451	Docking protein 2 isoform Iso 1 \Gname=DOK2 \NcbiTaxId=9606
nxp:NX_O60884-1	412	6	45698.6	6	31	0.1481	DnaJ homolog subfamily A member 2 isoform Iso 1 \Gname=DNAJA2 \NcbiTaxId=9606
nxp:NX_O75396-1	215	6	24559.5	6	89	0.3395	Vesicle-trafficking protein SEC22b isoform Iso 1 \Gname=SEC22B \NcbiTaxId=9606
nxp:NX_O94979-1	1220	0	132913	6	31	0.0615	Protein transport protein Sec31A isoform Iso 1 \Gname=SEC31A \NcbiTaxId=9606
nxp:NX_O94979-2	1205	0	131433.2	6	31	0.0622	Protein transport protein Sec31A isoform Iso 2 \Gname=SEC31A \NcbiTaxId=9606
nxp:NX_O94979-3	1106	0	121556.7	6	31	0.0678	Protein transport protein Sec31A isoform Iso 3 \Gname=SEC31A \NcbiTaxId=9606
nxp:NX_O94979-4	1181	0	128937	6	31	0.0635	Protein transport protein Sec31A isoform Iso 4 \Gname=SEC31A \NcbiTaxId=9606
nxp:NX_O94979-6	1067	0	117580.7	6	31	0.0703	Protein transport protein Sec31A isoform Iso 6 \Gname=SEC31A \NcbiTaxId=9606
nxp:NX_O94979-7	969	0	105667.8	6	31	0.0774	Protein transport protein Sec31A isoform Iso 7 \Gname=SEC31A \NcbiTaxId=9606
nxp:NX_O94979-8	1233	0	134396.7	6	31	0.0608	Protein transport protein Sec31A isoform Iso 8 \Gname=SEC31A \NcbiTaxId=9606
nxp:NX_O94979-9	1200	0	130646.7	6	31	0.0625	Protein transport protein Sec31A isoform Iso 9 \Gname=SEC31A \NcbiTaxId=9606
nxp:NX_O95197-3	236	4	25574.6	6	90	0.2669	Reticulon-3 isoform Iso 3 \Gname=RTN3 \NcbiTaxId=9606
nxp:NX_O95373-1	1038	6	119421.9	6	50	0.0684	Importin-7 isoform Iso 1 \Gname=IPO7 \NcbiTaxId=9606
nxp:NX_O95721-1	258	6	28934.6	6	46	0.2752	Synaptosomal-associated protein 29 isoform Iso 1 \Gname=SNAP29 \NcbiTaxId=9606
nxp:NX_O95831-1	613	0	66840.9	6	42	0.1093	Apoptosis-inducing factor 1. mitochondrial isoform Iso 1 \Gname=AIFM1 \NcbiTaxId=9606
nxp:NX_O95831-3	609	0	66235.5	6	42	0.11	Apoptosis-inducing factor 1. mitochondrial isoform Iso 3 \Gname=AIFM1 \NcbiTaxId=9606
nxp:NX_O95866-4	193	0	20138.2	6	16	0.3938	Protein G6b isoform D \Gname=G6B \NcbiTaxId=9606
nxp:NX_P00734-1	622	6	69974.1	6	22	0.1399	Prothrombin isoform Iso 1 \Gname=F2 \NcbiTaxId=9606
nxp:NX_P01112-2	170	0	18840.2	6	25	0.3059	GTPase HRas isoform Iso 2 \Gname=HRAS \NcbiTaxId=9606
nxp:NX_P02730-1	911	6	101709.4	6	54	0.0955	Band 3 anion transport protein isoform Iso 1 \Gname=SLC4A1 \NcbiTaxId=9606
nxp:NX_P04259-1	564	0	60012.3	6	85	0.0887	Keratin. type II cytoskeletal 6B isoform Iso 1 \Gname=KRT6B \NcbiTaxId=9606
nxp:NX_P05023-2	681	0	74074.6	6	32	0.1087	Sodium/potassium-transporting ATPase subunit alpha-1 isoform Iso 2 \Gname=ATP1A1 \NcbiTaxId=9606
nxp:NX_P07205-1	417	1	44749.3	6	13	0.1175	Phosphoglycerate kinase 2 isoform Iso 1 \Gname=PGK2 \NcbiTaxId=9606
nxp:NX_P09488-1	218	0	25677	6	25	0.2569	Glutathione S-transferase Mu 1 isoform Iso 1 \Gname=GSTM1 \NcbiTaxId=9606
nxp:NX_P09543-1	421	6	47530.7	6	15	0.1449	2'.3'-cyclic-nucleotide 3'-phosphodiesterase isoform CNPI \Gname=CNP \NcbiTaxId=9606
nxp:NX_P0C0L4-1	1744	0	192646.5	6	8	0.0499	Complement C4-A isoform Iso 1 \Gname=C4A \NcbiTaxId=9606
nxp:NX_P0C0L4-2	1698	0	187567.8	6	8	0.0512	Complement C4-A isoform Iso 2 \Gname=C4A \NcbiTaxId=9606
nxp:NX_P0C0L5-1	1744	0	192612.5	6	8	0.0499	Complement C4-B isoform Iso 1 \Gname=C4B;C4B_2 \NcbiTaxId=9606
nxp:NX_P11171-1	864	0	96939.3	6	27	0.0926	Protein 4.1 isoform Iso 1 \Gname=EPB41 \NcbiTaxId=9606
nxp:NX_P11171-2	831	0	93163.3	6	27	0.0963	Protein 4.1 isoform Iso 2 \Gname=EPB41 \NcbiTaxId=9606
nxp:NX_P11171-3	641	0	71893	6	27	0.1248	Protein 4.1 isoform Iso 3 \Gname=EPB41 \NcbiTaxId=9606
nxp:NX_P11171-4	588	0	66339.3	6	27	0.1361	Protein 4.1 isoform Iso 4 \Gname=EPB41 \NcbiTaxId=9606
nxp:NX_P11171-5	775	0	86531.8	6	27	0.1032	Protein 4.1 isoform Iso 6 \Gname=EPB41 \NcbiTaxId=9606
nxp:NX_P11908-1	318	0	34729	6	91	0.239	Ribose-phosphate pyrophosphokinase 2 isoform Iso 1 \Gname=PRPS2 \NcbiTaxId=9606
nxp:NX_P11908-2	321	0	35014.1	6	91	0.2368	Ribose-phosphate pyrophosphokinase 2 isoform Iso 2 \Gname=PRPS2 \NcbiTaxId=9606
nxp:NX_P13501-1	91	6	9965	6	115	0.4835	C-C motif chemokine 5 isoform Iso 1 \Gname=CCL5 \NcbiTaxId=9606
nxp:NX_P15498-1	845	0	98233.1	6	11	0.0805	Proto-oncogene vav isoform Iso 1 \Gname=VAV1 \NcbiTaxId=9606
nxp:NX_P15498-2	813	0	94414.4	6	11	0.0836	Proto-oncogene vav isoform Iso 2 \Gname=VAV1 \NcbiTaxId=9606
nxp:NX_P16930-1	419	6	46326.2	6	67	0.1527	Fumarylacetoacetase isoform Iso 1 \Gname=FAH \NcbiTaxId=9606
nxp:NX_P20591-1	662	5	75455.2	6	15	0.0952	Interferon-induced GTP-binding protein Mx1 isoform Iso 1 \Gname=MX1 \NcbiTaxId=9606
nxp:NX_P20645-1	277	6	30955.4	6	72	0.2058	Cation-dependent mannose-6-phosphate receptor isoform Iso 1 \Gname=M6PR \NcbiTaxId=9606
nxp:NX_P22234-1	425	0	47031.1	6	26	0.16	Multifunctional protein ADE2 isoform Iso 1 \Gname=PAICS \NcbiTaxId=9606
nxp:NX_P22234-2	432	0	47909.6	6	26	0.1574	Multifunctional protein ADE2 isoform Iso 2 \Gname=PAICS \NcbiTaxId=9606
nxp:NX_P22307-1	547	0	58937.6	6	31	0.0859	Non-specific lipid-transfer protein isoform SCPx \Gname=SCP2 \NcbiTaxId=9606
nxp:NX_P22307-6	140	0	15051.8	6	31	0.3357	Non-specific lipid-transfer protein isoform Iso 6 \Gname=SCP2 \NcbiTaxId=9606
nxp:NX_P22307-7	503	0	54362.4	6	31	0.0934	Non-specific lipid-transfer protein isoform Iso 7 \Gname=SCP2 \NcbiTaxId=9606
nxp:NX_P22307-8	523	0	56442.4	6	31	0.0899	Non-specific lipid-transfer protein isoform SCP2 \Gname=SCP2 \NcbiTaxId=9606
nxp:NX_P25787-1	234	6	25864.3	6	68	0.3675	Proteasome subunit alpha type-2 isoform Iso 1 \Gname=PSMA2 \NcbiTaxId=9606
nxp:NX_P29692-3	257	0	28522.4	6	36	0.2529	Elongation factor 1-delta isoform Iso 3 \Gname=EEF1D \NcbiTaxId=9606
nxp:NX_P30040-1	261	6	28957.1	6	151	0.2222	Endoplasmic reticulum resident protein 29 isoform Iso 1 \Gname=ERP29 \NcbiTaxId=9606
nxp:NX_P30043-1	206	6	22087.4	6	69	0.3835	Flavin reductase (NADPH) isoform Iso 1 \Gname=BLVRB \NcbiTaxId=9606
nxp:NX_P30046-1	118	5	12685.7	6	67	0.3814	D-dopachrome decarboxylase isoform Iso 1 \Gname=DDT \NcbiTaxId=9606
nxp:NX_P30456-1	365	0	40989.1	6	10	0.1945	HLA class I histocompatibility antigen. A-43 alpha chain isoform Iso 1 \Gname=HLA-A \NcbiTaxId=9606
nxp:NX_P30464-1	362	0	40345	6	23	0.2099	HLA class I histocompatibility antigen. B-15 alpha chain isoform Iso 1 \Gname=HLA-B \NcbiTaxId=9606
nxp:NX_P30481-1	362	0	40438.1	6	25	0.1906	HLA class I histocompatibility antigen. B-44 alpha chain isoform Iso 1 \Gname=HLA-B \NcbiTaxId=9606
nxp:NX_P30484-1	362	0	40397	6	23	0.2099	HLA class I histocompatibility antigen. B-46 alpha chain isoform Iso 1 \Gname=HLA-B \NcbiTaxId=9606
nxp:NX_P30495-1	362	0	40435.1	6	23	0.2099	HLA class I histocompatibility antigen. B-56 alpha chain isoform Iso 1 \Gname=HLA-B \NcbiTaxId=9606
nxp:NX_P30512-1	365	0	40819.2	6	7	0.1945	HLA class I histocompatibility antigen. A-29 alpha chain isoform Iso 1 \Gname=HLA-A \NcbiTaxId=9606
nxp:NX_P31323-1	418	6	46254.9	6	72	0.2081	cAMP-dependent protein kinase type II-beta regulatory subunit isoform Iso 1 \Gname=PRKAR2B \NcbiTaxId=9606
nxp:NX_P34897-1	504	6	55939.7	6	40	0.1528	Serine hydroxymethyltransferase. mitochondrial isoform Iso 3 \Gname=SHMT2 \NcbiTaxId=9606
nxp:NX_P45954-1	432	6	47437.3	6	27	0.1829	Short/branched chain specific acyl-CoA dehydrogenase. mitochondrial isoform Iso 1 \Gname=ACADSB \NcbiTaxId=9606
nxp:NX_P47712-1	749	6	85166.2	6	57	0.0841	Cytosolic phospholipase A2 isoform Iso 1 \Gname=PLA2G4A \NcbiTaxId=9606
nxp:NX_P48147-1	710	6	80630	6	19	0.107	Prolyl endopeptidase isoform Iso 1 \Gname=PREP \NcbiTaxId=9606
nxp:NX_P48741-1	367	0	40201.6	6	19	0.1444	Putative heat shock 70 kDa protein 7 isoform Iso 1 \Gname=HSPA7 \NcbiTaxId=9606
nxp:NX_P49720-1	205	6	22915.4	6	32	0.2976	Proteasome subunit beta type-3 isoform Iso 1 \Gname=PSMB3 \NcbiTaxId=9606
nxp:NX_P49721-1	201	6	22803.7	6	64	0.3184	Proteasome subunit beta type-2 isoform Iso 1 \Gname=PSMB2 \NcbiTaxId=9606
nxp:NX_P49755-1	219	6	24942	6	133	0.242	Transmembrane emp24 domain-containing protein 10 isoform Iso 1 \Gname=TMED10 \NcbiTaxId=9606
nxp:NX_P50226-1	295	0	34269.4	6	61	0.2237	Sulfotransferase 1A2 isoform Iso 1 \Gname=SULT1A2 \NcbiTaxId=9606
nxp:NX_P51606-2	254	0	29232.5	6	40	0.2126	N-acylglucosamine 2-epimerase isoform Iso 2 \Gname=RENBP \NcbiTaxId=9606
nxp:NX_P52306-2	558	0	60980	6	18	0.1039	Rap1 GTPase-GDP dissociation stimulator 1 isoform Iso 2 \Gname=RAP1GDS1 \NcbiTaxId=9606
nxp:NX_P52306-3	559	0	61051.1	6	18	0.1038	Rap1 GTPase-GDP dissociation stimulator 1 isoform Iso 3 \Gname=RAP1GDS1 \NcbiTaxId=9606
nxp:NX_P52306-6	516	0	56481.7	6	18	0.1124	Rap1 GTPase-GDP dissociation stimulator 1 isoform Iso 6 \Gname=RAP1GDS1 \NcbiTaxId=9606
nxp:NX_P55060-4	915	0	103795	6	10	0.0809	Exportin-2 isoform Iso 4 \Gname=CSE1L \NcbiTaxId=9606
nxp:NX_P61019-2	188	0	20816.3	6	58	0.3723	Ras-related protein Rab-2A isoform Iso 2 \Gname=RAB2A \NcbiTaxId=9606
nxp:NX_P61088-1	152	6	17109	6	79	0.3882	Ubiquitin-conjugating enzyme E2 N isoform Iso 1 \Gname=UBE2N \NcbiTaxId=9606
nxp:NX_P61201-1	443	0	51546	6	13	0.1445	COP9 signalosome complex subunit 2 isoform Iso 1 \Gname=COPS2 \NcbiTaxId=9606
nxp:NX_P61201-2	450	0	52353.4	6	13	0.1422	COP9 signalosome complex subunit 2 isoform Iso 2 \Gname=COPS2 \NcbiTaxId=9606
nxp:NX_P61225-1	183	5	20473.2	6	39	0.2568	Ras-related protein Rap-2b isoform Iso 1 \Gname=RAP2B \NcbiTaxId=9606
nxp:NX_P61769-1	119	6	13687.9	6	126	0.3529	Beta-2-microglobulin isoform Iso 1 \Gname=B2M \NcbiTaxId=9606
nxp:NX_P61952-1	73	6	8457.4	6	89	0.4521	Guanine nucleotide-binding protein G(I)/G(S)/G(O) subunit gamma-11 isoform Iso 1 \Gname=GNG11 \NcbiTaxId=9606
nxp:NX_P61978-1	463	0	50926.4	6	61	0.1814	Heterogeneous nuclear ribonucleoprotein K isoform Iso 1 \Gname=HNRNPK \NcbiTaxId=9606
nxp:NX_P61978-2	464	0	50978.4	6	61	0.181	Heterogeneous nuclear ribonucleoprotein K isoform Iso 2 \Gname=HNRNPK \NcbiTaxId=9606
nxp:NX_P61978-3	440	0	48514.2	6	61	0.1909	Heterogeneous nuclear ribonucleoprotein K isoform Iso 3 \Gname=HNRNPK \NcbiTaxId=9606
nxp:NX_P62714-1	309	0	35534.3	6	90	0.2621	Serine/threonine-protein phosphatase 2A catalytic subunit beta isoform isoform Iso 1 \Gname=PPP2CB \NcbiTaxId=9606
nxp:NX_P67775-1	309	0	35553.4	6	90	0.2621	Serine/threonine-protein phosphatase 2A catalytic subunit alpha isoform isoform Iso 1 \Gname=PPP2CA \NcbiTaxId=9606
nxp:NX_P78344-1	907	0	102278.8	6	64	0.0706	Eukaryotic translation initiation factor 4 gamma 2 isoform Iso 1 \Gname=EIF4G2 \NcbiTaxId=9606
nxp:NX_P78344-2	869	0	98069.7	6	64	0.0736	Eukaryotic translation initiation factor 4 gamma 2 isoform Iso 2 \Gname=EIF4G2 \NcbiTaxId=9606
nxp:NX_P99999-1	105	6	11723.1	6	201	0.3905	Cytochrome c isoform Iso 1 \Gname=CYCS \NcbiTaxId=9606
nxp:NX_Q03013-1	218	0	25526.8	6	41	0.2844	Glutathione S-transferase Mu 4 isoform Iso 1 \Gname=GSTM4 \NcbiTaxId=9606
nxp:NX_Q04446-1	702	6	80404.6	6	52	0.114	1.4-alpha-glucan-branching enzyme isoform Iso 1 \Gname=GBE1 \NcbiTaxId=9606
nxp:NX_Q05639-1	463	0	50420.3	6	37	0.1404	Elongation factor 1-alpha 2 isoform Iso 1 \Gname=EEF1A2 \NcbiTaxId=9606
nxp:NX_Q08209-1	521	0	58632.3	6	44	0.1267	Serine/threonine-protein phosphatase 2B catalytic subunit alpha isoform isoform Iso 1 \Gname=PPP3CA \NcbiTaxId=9606
nxp:NX_Q08209-2	511	0	57603.8	6	44	0.1292	Serine/threonine-protein phosphatase 2B catalytic subunit alpha isoform isoform Iso 2 \Gname=PPP3CA \NcbiTaxId=9606
nxp:NX_Q08209-3	469	0	52620.4	6	44	0.1407	Serine/threonine-protein phosphatase 2B catalytic subunit alpha isoform isoform Iso 3 \Gname=PPP3CA \NcbiTaxId=9606
nxp:NX_Q08257-3	295	1	31490.5	6	23	0.322	Quinone oxidoreductase isoform Iso 3 \Gname=CRYZ \NcbiTaxId=9606
nxp:NX_Q13043-2	462	0	52283.9	6	28	0.1667	Serine/threonine-protein kinase 4 isoform Iso 2 \Gname=STK4 \NcbiTaxId=9606
nxp:NX_Q13131-1	559	0	63950.5	6	43	0.1342	5'-AMP-activated protein kinase catalytic subunit alpha-1 isoform Iso 1 \Gname=PRKAA1 \NcbiTaxId=9606
nxp:NX_Q13131-2	574	0	65463.4	6	43	0.1307	5'-AMP-activated protein kinase catalytic subunit alpha-1 isoform Iso 2 \Gname=PRKAA1 \NcbiTaxId=9606
nxp:NX_Q13177-1	524	6	57987.9	6	33	0.1298	Serine/threonine-protein kinase PAK 2 isoform Iso 1 \Gname=PAK2 \NcbiTaxId=9606
nxp:NX_Q15366-3	362	0	38179.4	6	127	0.2182	Poly(rC)-binding protein 2 isoform Iso 3 \Gname=PCBP2 \NcbiTaxId=9606
nxp:NX_Q15366-6	361	0	38108.4	6	127	0.2188	Poly(rC)-binding protein 2 isoform Iso 6 \Gname=PCBP2 \NcbiTaxId=9606
nxp:NX_Q15382-1	184	6	20466.5	6	36	0.3207	GTP-binding protein Rheb isoform Iso 1 \Gname=RHEB \NcbiTaxId=9606
nxp:NX_Q16539-2	360	0	41448.9	6	24	0.2056	Mitogen-activated protein kinase 14 isoform CSBP1 \Gname=MAPK14 \NcbiTaxId=9606
nxp:NX_Q16881-1	649	0	70844.2	6	22	0.1186	Thioredoxin reductase 1. cytoplasmic isoform Iso 1 \Gname=TXNRD1 \NcbiTaxId=9606
nxp:NX_Q16881-2	543	0	59731.7	6	22	0.1418	Thioredoxin reductase 1. cytoplasmic isoform Iso 5 \Gname=TXNRD1 \NcbiTaxId=9606
nxp:NX_Q16881-3	598	0	65508.7	6	22	0.1288	Thioredoxin reductase 1. cytoplasmic isoform Iso 3 \Gname=TXNRD1 \NcbiTaxId=9606
nxp:NX_Q16881-4	551	0	60363.8	6	22	0.1397	Thioredoxin reductase 1. cytoplasmic isoform Iso 4 \Gname=TXNRD1 \NcbiTaxId=9606
nxp:NX_Q16881-6	614	0	67205.9	6	22	0.1254	Thioredoxin reductase 1. cytoplasmic isoform Iso 6 \Gname=TXNRD1 \NcbiTaxId=9606
nxp:NX_Q16891-3	726	0	79959.5	6	15	0.1033	Mitochondrial inner membrane protein isoform Iso 3 \Gname=IMMT \NcbiTaxId=9606
nxp:NX_Q32MZ4-1	808	0	89180.7	6	36	0.0903	Leucine-rich repeat flightless-interacting protein 1 isoform Iso 1 \Gname=LRRFIP1 \NcbiTaxId=9606
nxp:NX_Q32MZ4-2	784	0	86333.3	6	36	0.0931	Leucine-rich repeat flightless-interacting protein 1 isoform Iso 2 \Gname=LRRFIP1 \NcbiTaxId=9606
nxp:NX_Q32MZ4-3	752	0	82620.6	6	36	0.0971	Leucine-rich repeat flightless-interacting protein 1 isoform Iso 3 \Gname=LRRFIP1 \NcbiTaxId=9606
nxp:NX_Q5T4S7-1	5183	0	573458.4	6	23	0.0118	E3 ubiquitin-protein ligase UBR4 isoform Iso 1 \Gname=UBR4 \NcbiTaxId=9606
nxp:NX_Q5T4S7-2	5204	0	575574.4	6	23	0.0117	E3 ubiquitin-protein ligase UBR4 isoform Iso 2 \Gname=UBR4 \NcbiTaxId=9606
nxp:NX_Q5T4S7-3	5159	0	571470.5	6	23	0.0118	E3 ubiquitin-protein ligase UBR4 isoform Iso 3 \Gname=UBR4 \NcbiTaxId=9606
nxp:NX_Q5T4S7-4	5176	0	573223.4	6	23	0.0118	E3 ubiquitin-protein ligase UBR4 isoform Iso 4 \Gname=UBR4 \NcbiTaxId=9606
nxp:NX_Q5VWZ2-1	237	5	26281.4	6	26	0.3291	Lysophospholipase-like protein 1 isoform Iso 1 \Gname=LYPLAL1 \NcbiTaxId=9606
nxp:NX_Q6YHK3-1	1445	0	161569.3	6	13	0.0588	CD109 antigen isoform Iso 1 \Gname=CD109 \NcbiTaxId=9606
nxp:NX_Q6YHK3-4	1428	0	159577.2	6	13	0.0595	CD109 antigen isoform Iso 4 \Gname=CD109 \NcbiTaxId=9606
nxp:NX_Q7L9L4-1	216	0	25056.6	6	115	0.2593	MOB kinase activator 1B isoform Iso 1 \Gname=MOB1B \NcbiTaxId=9606
nxp:NX_Q7L9L4-2	221	0	25464.7	6	115	0.2534	MOB kinase activator 1B isoform Iso 2 \Gname=MOB1B \NcbiTaxId=9606
nxp:NX_Q86UT6-1	975	0	107530	6	9	0.0738	NLR family member X1 isoform Iso 1 \Gname=NLRX1 \NcbiTaxId=9606
nxp:NX_Q86UT6-2	921	0	101792.9	6	9	0.0782	NLR family member X1 isoform Iso 2 \Gname=NLRX1 \NcbiTaxId=9606
nxp:NX_Q86YZ3-1	2850	6	282209.6	6	24	0.0425	Hornerin isoform Iso 1 \Gname=HRNR \NcbiTaxId=9606
nxp:NX_Q8IZ83-1	802	6	85055.7	6	55	0.0985	Aldehyde dehydrogenase family 16 member A1 isoform Iso 1 \Gname=ALDH16A1 \NcbiTaxId=9606
nxp:NX_Q8IZP0-12	496	0	53861	6	28	0.1048	Abl interactor 1 isoform Iso 12 \Gname=ABI1 \NcbiTaxId=9606
nxp:NX_Q8TDZ2-2	981	0	108466.3	6	13	0.0591	Protein-methionine sulfoxide oxidase MICAL1 isoform Iso 2 \Gname=MICAL1 \NcbiTaxId=9606
nxp:NX_Q8TDZ2-4	1086	0	119727.7	6	13	0.0534	Protein-methionine sulfoxide oxidase MICAL1 isoform Iso 1 \Gname=MICAL1 \NcbiTaxId=9606
nxp:NX_Q8WUD1-1	216	2	24181.1	6	32	0.3472	Ras-related protein Rab-2B isoform Iso 1 \Gname=RAB2B \NcbiTaxId=9606
nxp:NX_Q8WZA0-1	190	6	21463.1	6	47	0.2947	Protein LZIC isoform Iso 1 \Gname=LZIC \NcbiTaxId=9606
nxp:NX_Q92614-1	2054	0	232953	6	47	0.0263	Unconventional myosin-XVIIIa isoform Iso 1 \Gname=MYO18A \NcbiTaxId=9606
nxp:NX_Q92614-2	1723	0	196297.9	6	47	0.0313	Unconventional myosin-XVIIIa isoform Iso 2 \Gname=MYO18A \NcbiTaxId=9606
nxp:NX_Q92614-3	2002	0	226531.8	6	47	0.027	Unconventional myosin-XVIIIa isoform Iso 3 \Gname=MYO18A \NcbiTaxId=9606
nxp:NX_Q92614-4	2039	0	231079	6	47	0.0265	Unconventional myosin-XVIIIa isoform Iso 5 \Gname=MYO18A \NcbiTaxId=9606
nxp:NX_Q92973-1	898	6	102270.8	6	70	0.0724	Transportin-1 isoform Iso 2 \Gname=TNPO1 \NcbiTaxId=9606
nxp:NX_Q96AX2-1	223	0	24781.5	6	27	0.3004	Ras-related protein Rab-37 isoform Iso 1 \Gname=RAB37 \NcbiTaxId=9606
nxp:NX_Q96AX2-4	186	0	20862.4	6	27	0.3602	Ras-related protein Rab-37 isoform Iso 4 \Gname=RAB37 \NcbiTaxId=9606
nxp:NX_Q96G23-1	380	6	44829.3	6	54	0.1263	Ceramide synthase 2 isoform Iso 1 \Gname=CERS2 \NcbiTaxId=9606
nxp:NX_Q96S97-1	322	6	35232.3	6	65	0.1894	Myeloid-associated differentiation marker isoform Iso 1 \Gname=MYADM \NcbiTaxId=9606
nxp:NX_Q96SB3-1	815	6	89119.7	6	53	0.0748	Neurabin-2 isoform Iso 1 \Gname=PPP1R9B \NcbiTaxId=9606
nxp:NX_Q96T51-3	412	0	44442.7	6	20	0.1845	RUN and FYVE domain-containing protein 1 isoform Iso 3 \Gname=RUFY1 \NcbiTaxId=9606
nxp:NX_Q99704-1	481	5	52341.2	6	13	0.1684	Docking protein 1 isoform Iso 3 \Gname=DOK1 \NcbiTaxId=9606
nxp:NX_Q99747-1	312	6	34706.3	6	52	0.234	Gamma-soluble NSF attachment protein isoform Iso 1 \Gname=NAPG \NcbiTaxId=9606
nxp:NX_Q99829-1	537	6	59003.5	6	70	0.0987	Copine-1 isoform Iso 1 \Gname=CPNE1 \NcbiTaxId=9606
nxp:NX_Q9H223-1	541	3	61118.5	6	7	0.1331	EH domain-containing protein 4 isoform Iso 1 \Gname=EHD4 \NcbiTaxId=9606
nxp:NX_Q9H479-1	309	6	35130.9	6	70	0.1812	Fructosamine-3-kinase isoform Iso 1 \Gname=FN3K \NcbiTaxId=9606
nxp:NX_Q9H8S9-1	216	0	25045.6	6	115	0.2593	MOB kinase activator 1A isoform Iso 1 \Gname=MOB1A \NcbiTaxId=9606
nxp:NX_Q9HDC9-1	416	0	46432.8	6	67	0.1562	Adipocyte plasma membrane-associated protein isoform Iso 1 \Gname=APMAP \NcbiTaxId=9606
nxp:NX_Q9HDC9-2	289	0	32122.7	6	67	0.2249	Adipocyte plasma membrane-associated protein isoform Iso 2 \Gname=APMAP \NcbiTaxId=9606
nxp:NX_Q9NRL3-1	753	6	80528.1	6	18	0.1142	Striatin-4 isoform Iso 1 \Gname=STRN4 \NcbiTaxId=9606
nxp:NX_Q9NUQ9-1	324	6	36706.6	6	16	0.2407	Protein FAM49B isoform Iso 1 \Gname=FAM49B \NcbiTaxId=9606
nxp:NX_Q9NY33-1	737	0	82519.8	6	15	0.1031	Dipeptidyl peptidase 3 isoform Iso 1 \Gname=DPP3 \NcbiTaxId=9606
nxp:NX_Q9NY33-4	707	0	79240.1	6	15	0.1075	Dipeptidyl peptidase 3 isoform Iso 4 \Gname=DPP3 \NcbiTaxId=9606
nxp:NX_Q9UHQ9-1	305	5	34055.2	6	52	0.1672	NADH-cytochrome b5 reductase 1 isoform Iso 1 \Gname=CYB5R1 \NcbiTaxId=9606
nxp:NX_Q9UJC5-1	107	6	12300.2	6	94	0.5794	SH3 domain-binding glutamic acid-rich-like protein 2 isoform Iso 1 \Gname=SH3BGRL2 \NcbiTaxId=9606
nxp:NX_Q9ULC5-3	739	0	82192.3	6	31	0.1028	Long-chain-fatty-acid--CoA ligase 5 isoform Iso 1 \Gname=ACSL5 \NcbiTaxId=9606
nxp:NX_Q9ULC5-4	659	0	73212.7	6	31	0.1153	Long-chain-fatty-acid--CoA ligase 5 isoform Iso 3 \Gname=ACSL5 \NcbiTaxId=9606
nxp:NX_Q9UQ16-1	869	0	97666.9	6	16	0.069	Dynamin-3 isoform Iso 1 \Gname=DNM3 \NcbiTaxId=9606
nxp:NX_Q9UQ16-2	859	0	96603.4	6	16	0.0698	Dynamin-3 isoform Iso 2 \Gname=DNM3 \NcbiTaxId=9606
nxp:NX_Q9UQ16-3	863	0	97016.6	6	16	0.0695	Dynamin-3 isoform Iso 3 \Gname=DNM3 \NcbiTaxId=9606
nxp:NX_Q9UQ16-4	873	0	98080.1	6	16	0.0687	Dynamin-3 isoform Iso 4 \Gname=DNM3 \NcbiTaxId=9606
nxp:NX_Q9Y6B6-1	198	1	22377.5	6	97	0.2475	GTP-binding protein SAR1b isoform Iso 1 \Gname=SAR1B \NcbiTaxId=9606
nxp:NX_A0AVT1-1	1052	5	117877	5	18	0.0637	Ubiquitin-like modifier-activating enzyme 6 isoform Iso 2 \Gname=UBA6 \NcbiTaxId=9606
nxp:NX_O14639-1	778	0	87613.1	5	12	0.0668	Actin-binding LIM protein 1 isoform Iso 1 \Gname=ABLIM1 \NcbiTaxId=9606
nxp:NX_O14639-2	718	0	81050.5	5	12	0.0724	Actin-binding LIM protein 1 isoform Iso 2 \Gname=ABLIM1 \NcbiTaxId=9606
nxp:NX_O14828-2	321	0	35160.8	5	10	0.2118	Secretory carrier-associated membrane protein 3 isoform Iso 2 \Gname=SCAMP3 \NcbiTaxId=9606
nxp:NX_O15127-1	329	5	36607.3	5	116	0.1915	Secretory carrier-associated membrane protein 2 isoform Iso 1 \Gname=SCAMP2 \NcbiTaxId=9606
nxp:NX_O15173-1	223	4	23785.7	5	98	0.2242	Membrane-associated progesterone receptor component 2 isoform Iso 1 \Gname=PGRMC2 \NcbiTaxId=9606
nxp:NX_O15439-1	1325	0	149413.7	5	30	0.0355	Multidrug resistance-associated protein 4 isoform Iso 1 \Gname=ABCC4 \NcbiTaxId=9606
nxp:NX_O15439-2	1278	0	144090.9	5	30	0.0368	Multidrug resistance-associated protein 4 isoform Iso 2 \Gname=ABCC4 \NcbiTaxId=9606
nxp:NX_O43312-1	755	0	82181.9	5	34	0.0874	Metastasis suppressor protein 1 isoform Iso 1 \Gname=MTSS1 \NcbiTaxId=9606
nxp:NX_O43312-4	730	0	79077	5	34	0.0904	Metastasis suppressor protein 1 isoform Iso 3 \Gname=MTSS1 \NcbiTaxId=9606
nxp:NX_O43561-1	262	0	27894.4	5	63	0.271	Linker for activation of T-cells family member 1 isoform Long \Gname=LAT \NcbiTaxId=9606
nxp:NX_O43561-2	233	0	24951.9	5	63	0.3047	Linker for activation of T-cells family member 1 isoform Short \Gname=LAT \NcbiTaxId=9606
nxp:NX_O43665-3	181	5	21178.6	5	32	0.2652	Regulator of G-protein signaling 10 isoform Iso 3 \Gname=RGS10 \NcbiTaxId=9606
nxp:NX_O60282-1	957	0	109409.2	5	17	0.0564	Kinesin heavy chain isoform 5C isoform Iso 1 \Gname=KIF5C \NcbiTaxId=9606
nxp:NX_O60664-3	433	0	46899.9	5	15	0.1917	Perilipin-3 isoform Iso 3 \Gname=PLIN3 \NcbiTaxId=9606
nxp:NX_O75347-1	108	5	12828.7	5	41	0.3704	Tubulin-specific chaperone A isoform Iso 1 \Gname=TBCA \NcbiTaxId=9606
nxp:NX_O75608-1	230	0	24635.5	5	47	0.2391	Acyl-protein thioesterase 1 isoform Iso 1 \Gname=LYPLA1 \NcbiTaxId=9606
nxp:NX_O75608-2	214	0	22842.6	5	47	0.257	Acyl-protein thioesterase 1 isoform Iso 2 \Gname=LYPLA1 \NcbiTaxId=9606
nxp:NX_O75695-1	350	5	39597.4	5	35	0.1171	Protein XRP2 isoform Iso 1 \Gname=RP2 \NcbiTaxId=9606
nxp:NX_O75947-2	137	0	15745.2	5	12	0.4599	ATP synthase subunit d. mitochondrial isoform Iso 2 \Gname=ATP5H \NcbiTaxId=9606
nxp:NX_O75964-1	103	5	11403.2	5	63	0.4466	ATP synthase subunit g. mitochondrial isoform Iso 1 \Gname=ATP5L \NcbiTaxId=9606
nxp:NX_O95865-1	285	5	29607.4	5	30	0.2632	N(G).N(G)-dimethylarginine dimethylaminohydrolase 2 isoform Iso 1 \Gname=DDAH2 \NcbiTaxId=9606
nxp:NX_P01861-1	327	1	35899.9	5	18	0.2049	Ig gamma-4 chain C region isoform Iso 1 \Gname=IGHG4 \NcbiTaxId=9606
nxp:NX_P02533-1	472	1	51511.4	5	51	0.0847	Keratin. type I cytoskeletal 14 isoform Iso 1 \Gname=KRT14 \NcbiTaxId=9606
nxp:NX_P02765-1	367	5	39281.7	5	21	0.1362	Alpha-2-HS-glycoprotein isoform Iso 1 \Gname=AHSG \NcbiTaxId=9606
nxp:NX_P04222-1	366	0	40817.3	5	9	0.194	HLA class I histocompatibility antigen. Cw-3 alpha chain isoform Iso 1 \Gname=HLA-C \NcbiTaxId=9606
nxp:NX_P07108-4	129	0	14340.2	5	27	0.3411	Acyl-CoA-binding protein isoform Iso 4 \Gname=DBI \NcbiTaxId=9606
nxp:NX_P07108-5	148	0	16466.4	5	27	0.2973	Acyl-CoA-binding protein isoform Iso 5 \Gname=DBI \NcbiTaxId=9606
nxp:NX_P07741-1	180	0	19577.4	5	109	0.2889	Adenine phosphoribosyltransferase isoform Iso 1 \Gname=APRT \NcbiTaxId=9606
nxp:NX_P07741-2	134	0	14529.8	5	109	0.3881	Adenine phosphoribosyltransferase isoform Iso 2 \Gname=APRT \NcbiTaxId=9606
nxp:NX_P08779-1	473	1	51218.2	5	22	0.074	Keratin. type I cytoskeletal 16 isoform Iso 1 \Gname=KRT16 \NcbiTaxId=9606
nxp:NX_P09488-2	181	0	21220.7	5	24	0.2762	Glutathione S-transferase Mu 1 isoform Iso 2 \Gname=GSTM1 \NcbiTaxId=9606
nxp:NX_P0CG05-1	106	2	11268.5	5	45	0.6698	Ig lambda-2 chain C regions isoform Iso 1 \Gname=IGLC2 \NcbiTaxId=9606
nxp:NX_P10321-1	366	0	40604.9	5	27	0.1612	HLA class I histocompatibility antigen. Cw-7 alpha chain isoform Iso 1 \Gname=HLA-C \NcbiTaxId=9606
nxp:NX_P11279-1	417	5	44835.8	5	26	0.1175	Lysosome-associated membrane glycoprotein 1 isoform Iso 1 \Gname=LAMP1 \NcbiTaxId=9606
nxp:NX_P14324-1	419	5	48226.6	5	68	0.1265	Farnesyl pyrophosphate synthase isoform Iso 2 \Gname=FDPS \NcbiTaxId=9606
nxp:NX_P15529-1	392	0	43700.7	5	22	0.0765	Membrane cofactor protein isoform A \Gname=CD46 \NcbiTaxId=9606
nxp:NX_P15529-10	387	0	43239.5	5	22	0.0775	Membrane cofactor protein isoform Iso 2 \Gname=CD46 \NcbiTaxId=9606
nxp:NX_P15529-11	377	0	42201.9	5	22	0.0796	Membrane cofactor protein isoform C \Gname=CD46 \NcbiTaxId=9606
nxp:NX_P15529-12	362	0	40823.2	5	22	0.0829	Membrane cofactor protein isoform E \Gname=CD46 \NcbiTaxId=9606
nxp:NX_P15529-13	378	0	42146.9	5	22	0.0794	Membrane cofactor protein isoform G \Gname=CD46 \NcbiTaxId=9606
nxp:NX_P15529-14	363	0	40648.1	5	22	0.0826	Membrane cofactor protein isoform I \Gname=CD46 \NcbiTaxId=9606
nxp:NX_P15529-15	348	0	39269.4	5	22	0.0862	Membrane cofactor protein isoform K \Gname=CD46 \NcbiTaxId=9606
nxp:NX_P15529-2	399	0	44190.9	5	22	0.0752	Membrane cofactor protein isoform B \Gname=CD46 \NcbiTaxId=9606
nxp:NX_P15529-3	384	0	42692	5	22	0.0781	Membrane cofactor protein isoform D \Gname=CD46 \NcbiTaxId=9606
nxp:NX_P15529-4	369	0	41313.4	5	22	0.0813	Membrane cofactor protein isoform F \Gname=CD46 \NcbiTaxId=9606
nxp:NX_P15529-5	385	0	42637.1	5	22	0.0779	Membrane cofactor protein isoform H \Gname=CD46 \NcbiTaxId=9606
nxp:NX_P15529-6	370	0	41138.2	5	22	0.0811	Membrane cofactor protein isoform J \Gname=CD46 \NcbiTaxId=9606
nxp:NX_P15529-7	355	0	39759.6	5	22	0.0845	Membrane cofactor protein isoform L \Gname=CD46 \NcbiTaxId=9606
nxp:NX_P15529-8	364	0	40659.9	5	22	0.0824	Membrane cofactor protein isoform M \Gname=CD46 \NcbiTaxId=9606
nxp:NX_P15529-9	349	0	39281.2	5	22	0.086	Membrane cofactor protein isoform N \Gname=CD46 \NcbiTaxId=9606
nxp:NX_P17980-1	439	5	49154.4	5	31	0.1253	26S protease regulatory subunit 6A isoform Iso 1 \Gname=PSMC3 \NcbiTaxId=9606
nxp:NX_P18465-1	362	0	40180.9	5	10	0.1713	HLA class I histocompatibility antigen. B-57 alpha chain isoform Iso 1 \Gname=HLA-B \NcbiTaxId=9606
nxp:NX_P20936-1	1047	0	116311.4	5	65	0.0554	Ras GTPase-activating protein 1 isoform Iso 1 \Gname=RASA1 \NcbiTaxId=9606
nxp:NX_P20936-2	870	0	100316.5	5	65	0.0667	Ras GTPase-activating protein 1 isoform Iso 2 \Gname=RASA1 \NcbiTaxId=9606
nxp:NX_P21108-1	318	1	34799	5	37	0.195	Ribose-phosphate pyrophosphokinase 3 isoform Iso 1 \Gname=PRPS1L1 \NcbiTaxId=9606
nxp:NX_P25786-1	263	0	29518.9	5	53	0.2167	Proteasome subunit alpha type-1 isoform Short \Gname=PSMA1 \NcbiTaxId=9606
nxp:NX_P25786-2	269	0	30202.3	5	53	0.2119	Proteasome subunit alpha type-1 isoform Long \Gname=PSMA1 \NcbiTaxId=9606
nxp:NX_P28062-1	276	0	30316.6	5	75	0.1848	Proteasome subunit beta type-8 isoform Iso 1 \Gname=PSMB8 \NcbiTaxId=9606
nxp:NX_P28062-2	272	0	29732.3	5	75	0.1875	Proteasome subunit beta type-8 isoform Iso 2 \Gname=PSMB8 \NcbiTaxId=9606
nxp:NX_P28066-1	241	5	26376.2	5	99	0.2573	Proteasome subunit alpha type-5 isoform Iso 2 \Gname=PSMA5 \NcbiTaxId=9606
nxp:NX_P28070-1	264	5	29167.5	5	23	0.2197	Proteasome subunit beta type-4 isoform Iso 1 \Gname=PSMB4 \NcbiTaxId=9606
nxp:NX_P28161-1	218	0	25710	5	30	0.2661	Glutathione S-transferase Mu 2 isoform Iso 1 \Gname=GSTM2 \NcbiTaxId=9606
nxp:NX_P29122-1	969	0	106333.2	5	38	0.0599	Proprotein convertase subtilisin/kexin type 6 isoform PACE4A-I \Gname=PCSK6 \NcbiTaxId=9606
nxp:NX_P29122-2	956	0	105034.5	5	38	0.0607	Proprotein convertase subtilisin/kexin type 6 isoform PACE4A-II \Gname=PCSK6 \NcbiTaxId=9606
nxp:NX_P29122-7	975	0	106587.8	5	38	0.0595	Proprotein convertase subtilisin/kexin type 6 isoform PACE4E-I \Gname=PCSK6 \NcbiTaxId=9606
nxp:NX_P29122-8	962	0	105289.1	5	38	0.0603	Proprotein convertase subtilisin/kexin type 6 isoform PACE4E-II \Gname=PCSK6 \NcbiTaxId=9606
nxp:NX_P29279-1	349	5	38046.8	5	15	0.1404	Connective tissue growth factor isoform Iso 1 \Gname=CTGF \NcbiTaxId=9606
nxp:NX_P30042-1	268	5	28134.7	5	71	0.2873	ES1 protein homolog. mitochondrial isoform Long \Gname=C21orf33 \NcbiTaxId=9606
nxp:NX_P30044-3	170	0	17425.1	5	17	0.3118	Peroxiredoxin-5. mitochondrial isoform Iso 3 \Gname=PRDX5 \NcbiTaxId=9606
nxp:NX_P30085-1	196	5	22190.3	5	75	0.2959	UMP-CMP kinase isoform Iso 1 \Gname=CMPK1 \NcbiTaxId=9606
nxp:NX_P30443-1	365	0	40802.2	5	14	0.211	HLA class I histocompatibility antigen. A-1 alpha chain isoform Iso 1 \Gname=HLA-A \NcbiTaxId=9606
nxp:NX_P30455-1	365	0	40890.2	5	14	0.211	HLA class I histocompatibility antigen. A-36 alpha chain isoform Iso 1 \Gname=HLA-A \NcbiTaxId=9606
nxp:NX_P30566-1	484	4	54836	5	42	0.126	Adenylosuccinate lyase isoform Iso 1 \Gname=ADSL \NcbiTaxId=9606
nxp:NX_P32189-1	524	0	57434.1	5	15	0.1317	Glycerol kinase isoform Iso 1 \Gname=GK \NcbiTaxId=9606
nxp:NX_P32189-2	553	0	60535.7	5	15	0.1248	Glycerol kinase isoform Iso 2 \Gname=GK \NcbiTaxId=9606
nxp:NX_P32189-3	559	0	61187.1	5	15	0.1234	Glycerol kinase isoform Iso 3 \Gname=GK \NcbiTaxId=9606
nxp:NX_P32189-4	530	0	58085.5	5	15	0.1302	Glycerol kinase isoform Iso 4 \Gname=GK \NcbiTaxId=9606
nxp:NX_P34810-1	354	0	37366.8	5	24	0.1186	Macrosialin isoform Long \Gname=CD68 \NcbiTaxId=9606
nxp:NX_P34810-2	297	0	31700.1	5	24	0.1414	Macrosialin isoform Short \Gname=CD68 \NcbiTaxId=9606
nxp:NX_P34810-3	327	0	34614.5	5	24	0.1284	Macrosialin isoform Iso 3 \Gname=CD68 \NcbiTaxId=9606
nxp:NX_P36957-1	453	5	48706.5	5	55	0.1214	Dihydrolipoyllysine-residue succinyltransferase component of 2-oxoglutarate dehydrogenase complex. mitochondrial isoform Iso 1 \Gname=DLST \NcbiTaxId=9606
nxp:NX_P37235-1	193	4	22281	5	100	0.2539	Hippocalcin-like protein 1 isoform Iso 1 \Gname=HPCAL1 \NcbiTaxId=9606
nxp:NX_P42858-1	3142	5	347364.8	5	8	0.0213	Huntingtin isoform Iso 1 \Gname=HTT \NcbiTaxId=9606
nxp:NX_P43487-1	201	5	23277.6	5	25	0.2438	Ran-specific GTPase-activating protein isoform Iso 1 \Gname=RANBP1 \NcbiTaxId=9606
nxp:NX_P46439-1	218	0	25640.2	5	27	0.211	Glutathione S-transferase Mu 5 isoform Iso 1 \Gname=GSTM5 \NcbiTaxId=9606
nxp:NX_P48507-1	274	5	30689.8	5	27	0.2482	Glutamate--cysteine ligase regulatory subunit isoform Iso 1 \Gname=GCLM \NcbiTaxId=9606
nxp:NX_P48637-2	363	0	40305.8	5	14	0.1129	Glutathione synthetase isoform Iso 2 \Gname=GSS \NcbiTaxId=9606
nxp:NX_P49619-1	791	0	89047.9	5	8	0.0898	Diacylglycerol kinase gamma isoform Iso 1 \Gname=DGKG \NcbiTaxId=9606
nxp:NX_P49619-3	752	0	84499.8	5	8	0.0944	Diacylglycerol kinase gamma isoform Iso 3 \Gname=DGKG \NcbiTaxId=9606
nxp:NX_P53007-1	311	5	33973	5	45	0.1736	Tricarboxylate transport protein. mitochondrial isoform Iso 1 \Gname=SLC25A1 \NcbiTaxId=9606
nxp:NX_P53990-1	364	0	39707.4	5	22	0.1566	IST1 homolog isoform Iso 1 \Gname=IST1 \NcbiTaxId=9606
nxp:NX_P53990-2	335	0	36581	5	22	0.1701	IST1 homolog isoform Iso 2 \Gname=IST1 \NcbiTaxId=9606
nxp:NX_P53990-5	379	0	41521.4	5	22	0.1504	IST1 homolog isoform Iso 4 \Gname=IST1 \NcbiTaxId=9606
nxp:NX_P53992-1	1094	5	118231.1	5	32	0.0585	Protein transport protein Sec24C isoform Iso 1 \Gname=SEC24C \NcbiTaxId=9606
nxp:NX_P54819-3	202	1	22232.8	5	22	0.2475	Adenylate kinase 2. mitochondrial isoform Iso 3 \Gname=AK2 \NcbiTaxId=9606
nxp:NX_P55809-1	520	5	56103.9	5	40	0.1192	Succinyl-CoA:3-ketoacid coenzyme A transferase 1. mitochondrial isoform Iso 1 \Gname=OXCT1 \NcbiTaxId=9606
nxp:NX_P56202-1	376	5	42075.1	5	27	0.1888	Cathepsin W isoform Iso 1 \Gname=CTSW \NcbiTaxId=9606
nxp:NX_P59998-2	625	0	71654.8	5	21	0.0928	Tubulin monoglycylase TTLL3 isoform Iso 4 \Gname=TTLL3 \NcbiTaxId=9606
nxp:NX_P60891-1	318	4	34793.9	5	73	0.195	Ribose-phosphate pyrophosphokinase 1 isoform Iso 1 \Gname=PRPS1 \NcbiTaxId=9606
nxp:NX_P61020-1	215	2	23673.9	5	63	0.2698	Ras-related protein Rab-5B isoform Iso 1 \Gname=RAB5B \NcbiTaxId=9606
nxp:NX_P62333-1	389	5	44127.1	5	44	0.1645	26S protease regulatory subunit 10B isoform Iso 1 \Gname=PSMC6 \NcbiTaxId=9606
nxp:NX_P62495-1	437	5	48982.1	5	69	0.1098	Eukaryotic peptide chain release factor subunit 1 isoform Iso 1 \Gname=ETF1 \NcbiTaxId=9606
nxp:NX_P62993-2	176	0	20526	5	15	0.2557	Growth factor receptor-bound protein 2 isoform Iso 2 \Gname=GRB2 \NcbiTaxId=9606
nxp:NX_P84095-1	191	4	21276.9	5	28	0.3613	Rho-related GTP-binding protein RhoG isoform Iso 1 \Gname=RHOG \NcbiTaxId=9606
nxp:NX_P98172-1	346	5	37964.5	5	20	0.1908	Ephrin-B1 isoform Iso 1 \Gname=EFNB1 \NcbiTaxId=9606
nxp:NX_Q01469-1	135	5	15136.5	5	16	0.3778	Fatty acid-binding protein. epidermal isoform Iso 1 \Gname=FABP5 \NcbiTaxId=9606
nxp:NX_Q03013-2	195	0	22796.2	5	40	0.2872	Glutathione S-transferase Mu 4 isoform Iso 2 \Gname=GSTM4 \NcbiTaxId=9606
nxp:NX_Q04760-1	184	0	20746.2	5	21	0.288	Lactoylglutathione lyase isoform Iso 1 \Gname=GLO1 \NcbiTaxId=9606
nxp:NX_Q04760-2	169	0	19012.6	5	21	0.3136	Lactoylglutathione lyase isoform Iso 2 \Gname=GLO1 \NcbiTaxId=9606
nxp:NX_Q06124-1	597	0	68375.3	5	13	0.0938	Tyrosine-protein phosphatase non-receptor type 11 isoform Iso 1 \Gname=PTPN11 \NcbiTaxId=9606
nxp:NX_Q06124-2	593	0	67950	5	13	0.0944	Tyrosine-protein phosphatase non-receptor type 11 isoform Iso 2 \Gname=PTPN11 \NcbiTaxId=9606
nxp:NX_Q06124-3	460	0	52776.5	5	13	0.1217	Tyrosine-protein phosphatase non-receptor type 11 isoform Iso 3 \Gname=PTPN11 \NcbiTaxId=9606
nxp:NX_Q08257-1	329	0	35166.5	5	22	0.2462	Quinone oxidoreductase isoform Iso 1 \Gname=CRYZ \NcbiTaxId=9606
nxp:NX_Q12840-1	1032	0	117287.5	5	17	0.0523	Kinesin heavy chain isoform 5A isoform Iso 1 \Gname=KIF5A \NcbiTaxId=9606
nxp:NX_Q13492-1	652	0	70692	5	28	0.0675	Phosphatidylinositol-binding clathrin assembly protein isoform Iso 1 \Gname=PICALM \NcbiTaxId=9606
nxp:NX_Q13492-2	632	0	68703	5	28	0.0696	Phosphatidylinositol-binding clathrin assembly protein isoform Iso 2 \Gname=PICALM \NcbiTaxId=9606
nxp:NX_Q13492-3	610	0	66332.8	5	28	0.0721	Phosphatidylinositol-binding clathrin assembly protein isoform Iso 3 \Gname=PICALM \NcbiTaxId=9606
nxp:NX_Q13492-4	551	0	59862.7	5	28	0.0799	Phosphatidylinositol-binding clathrin assembly protein isoform Iso 4 \Gname=PICALM \NcbiTaxId=9606
nxp:NX_Q13492-5	645	0	69974.6	5	28	0.0682	Phosphatidylinositol-binding clathrin assembly protein isoform Iso 5 \Gname=PICALM \NcbiTaxId=9606
nxp:NX_Q14155-2	753	0	84405.5	5	19	0.077	Rho guanine nucleotide exchange factor 7 isoform Iso 6 \Gname=ARHGEF7 \NcbiTaxId=9606
nxp:NX_Q14155-3	782	0	87697.1	5	19	0.0742	Rho guanine nucleotide exchange factor 7 isoform Iso 3 \Gname=ARHGEF7 \NcbiTaxId=9606
nxp:NX_Q14155-4	803	0	89937.3	5	19	0.0722	Rho guanine nucleotide exchange factor 7 isoform Iso 4 \Gname=ARHGEF7 \NcbiTaxId=9606
nxp:NX_Q14155-5	731	0	82501.1	5	19	0.0793	Rho guanine nucleotide exchange factor 7 isoform Iso 1 \Gname=ARHGEF7 \NcbiTaxId=9606
nxp:NX_Q15366-4	331	0	34876.9	5	124	0.1964	Poly(rC)-binding protein 2 isoform Iso 4 \Gname=PCBP2 \NcbiTaxId=9606
nxp:NX_Q15366-5	335	0	35306.2	5	124	0.194	Poly(rC)-binding protein 2 isoform Iso 5 \Gname=PCBP2 \NcbiTaxId=9606
nxp:NX_Q15631-1	228	4	26148.8	5	10	0.25	Translin isoform Iso 1 \Gname=TSN \NcbiTaxId=9606
nxp:NX_Q16539-4	307	0	35412.4	5	18	0.2117	Mitogen-activated protein kinase 14 isoform Exip \Gname=MAPK14 \NcbiTaxId=9606
nxp:NX_Q29718-1	362	0	40378	5	10	0.1602	HLA class I histocompatibility antigen. B-82 alpha chain isoform Iso 1 \Gname=HLA-B \NcbiTaxId=9606
nxp:NX_Q58FF6-1	505	1	58209.6	5	8	0.0891	Putative heat shock protein HSP 90-beta 4 isoform Iso 1 \Gname=HSP90AB4P \NcbiTaxId=9606
nxp:NX_Q5T5C0-1	1151	0	127473.9	5	20	0.0626	Syntaxin-binding protein 5 isoform Iso 1 \Gname=STXBP5 \NcbiTaxId=9606
nxp:NX_Q5T5C0-2	1115	0	123395.9	5	20	0.0646	Syntaxin-binding protein 5 isoform Iso 2 \Gname=STXBP5 \NcbiTaxId=9606
nxp:NX_Q5T5C0-3	1098	0	121501.8	5	20	0.0656	Syntaxin-binding protein 5 isoform Iso 3 \Gname=STXBP5 \NcbiTaxId=9606
nxp:NX_Q5VWZ2-2	221	0	24442.5	5	17	0.3077	Lysophospholipase-like protein 1 isoform Iso 2 \Gname=LYPLAL1 \NcbiTaxId=9606
nxp:NX_Q6UX71-1	529	0	59527.5	5	63	0.1342	Plexin domain-containing protein 2 isoform Iso 1 \Gname=PLXDC2 \NcbiTaxId=9606
nxp:NX_Q6UX71-2	480	0	53859.8	5	63	0.1479	Plexin domain-containing protein 2 isoform Iso 3 \Gname=PLXDC2 \NcbiTaxId=9606
nxp:NX_Q86UE4-1	582	5	63780.8	5	12	0.1031	Protein LYRIC isoform Iso 1 \Gname=MTDH \NcbiTaxId=9606
nxp:NX_Q8IVB4-1	645	5	72499.9	5	43	0.1101	Sodium/hydrogen exchanger 9 isoform Iso 1 \Gname=SLC9A9 \NcbiTaxId=9606
nxp:NX_Q8IZ83-3	751	0	79849.1	5	30	0.0905	Aldehyde dehydrogenase family 16 member A1 isoform Iso 3 \Gname=ALDH16A1 \NcbiTaxId=9606
nxp:NX_Q8N1Q1-1	262	5	29407	5	11	0.2405	Carbonic anhydrase 13 isoform Iso 1 \Gname=CA13 \NcbiTaxId=9606
nxp:NX_Q8N4L2-1	257	5	28044.2	5	25	0.2879	Transmembrane protein 55A isoform Iso 1 \Gname=TMEM55A \NcbiTaxId=9606
nxp:NX_Q8N5K1-1	135	5	15250.4	5	108	0.4148	CDGSH iron-sulfur domain-containing protein 2 isoform Iso 1 \Gname=CISD2 \NcbiTaxId=9606
nxp:NX_Q8NE86-2	330	0	36954.1	5	62	0.1424	Calcium uniporter protein. mitochondrial isoform Iso 2 \Gname=MCU \NcbiTaxId=9606
nxp:NX_Q8NF50-1	2099	0	238359.4	5	25	0.0238	Dedicator of cytokinesis protein 8 isoform Iso 3 \Gname=DOCK8 \NcbiTaxId=9606
nxp:NX_Q8NF50-2	2067	0	235017.8	5	25	0.0242	Dedicator of cytokinesis protein 8 isoform Iso 4 \Gname=DOCK8 \NcbiTaxId=9606
nxp:NX_Q8WVM8-1	642	5	72316	5	53	0.1262	Sec1 family domain-containing protein 1 isoform Iso 2 \Gname=SCFD1 \NcbiTaxId=9606
nxp:NX_Q8WWA1-2	203	2	22261.8	5	40	0.3892	Transmembrane protein 40 isoform Iso 2 \Gname=TMEM40 \NcbiTaxId=9606
nxp:NX_Q92598-1	858	0	96785.6	5	63	0.0781	Heat shock protein 105 kDa isoform Alpha \Gname=HSPH1 \NcbiTaxId=9606
nxp:NX_Q92598-2	814	0	92039.4	5	63	0.0823	Heat shock protein 105 kDa isoform Beta \Gname=HSPH1 \NcbiTaxId=9606
nxp:NX_Q92598-3	817	0	92178.3	5	63	0.082	Heat shock protein 105 kDa isoform Iso 3 \Gname=HSPH1 \NcbiTaxId=9606
nxp:NX_Q92882-1	214	5	23753.9	5	21	0.2991	Osteoclast-stimulating factor 1 isoform Iso 1 \Gname=OSTF1 \NcbiTaxId=9606
nxp:NX_Q92930-1	207	2	23551.1	5	131	0.2415	Ras-related protein Rab-8B isoform Iso 1 \Gname=RAB8B \NcbiTaxId=9606
nxp:NX_Q96BS2-1	214	2	24716	5	28	0.285	Calcineurin B homologous protein 3 isoform Iso 1 \Gname=TESC \NcbiTaxId=9606
nxp:NX_Q96P48-5	679	0	77482.5	5	28	0.1016	Arf-GAP with Rho-GAP domain. ANK repeat and PH domain-containing protein 1 isoform Iso 5 \Gname=ARAP1 \NcbiTaxId=9606
nxp:NX_Q99439-2	270	1	29463.2	5	9	0.2407	Calponin-2 isoform Iso 2 \Gname=CNN2 \NcbiTaxId=9606
nxp:NX_Q9BUL8-1	212	5	24667.8	5	30	0.2358	Programmed cell death protein 10 isoform Iso 1 \Gname=PDCD10 \NcbiTaxId=9606
nxp:NX_Q9BV40-1	100	5	11413	5	113	0.41	Vesicle-associated membrane protein 8 isoform Iso 1 \Gname=VAMP8 \NcbiTaxId=9606
nxp:NX_Q9BX67-1	310	0	34979.8	5	25	0.171	Junctional adhesion molecule C isoform Iso 1 \Gname=JAM3 \NcbiTaxId=9606
nxp:NX_Q9BX67-2	259	0	29186.7	5	25	0.2046	Junctional adhesion molecule C isoform Iso 2 \Gname=JAM3 \NcbiTaxId=9606
nxp:NX_Q9BX68-1	163	5	17133.2	5	70	0.4847	Histidine triad nucleotide-binding protein 2. mitochondrial isoform Iso 1 \Gname=HINT2 \NcbiTaxId=9606
nxp:NX_Q9H0P0-1	297	0	33875.4	5	26	0.1481	Cytosolic 5'-nucleotidase 3A isoform Iso 4 \Gname=NT5C3A \NcbiTaxId=9606
nxp:NX_Q9H0P0-4	336	0	37905.8	5	26	0.131	Cytosolic 5'-nucleotidase 3A isoform Iso 2 \Gname=NT5C3A \NcbiTaxId=9606
nxp:NX_Q9H8H3-1	244	5	28282.5	5	80	0.2623	Methyltransferase-like protein 7A isoform Iso 1 \Gname=METTL7A \NcbiTaxId=9606
nxp:NX_Q9HD45-1	589	5	67825.1	5	46	0.0798	Transmembrane 9 superfamily member 3 isoform Iso 1 \Gname=TM9SF3 \NcbiTaxId=9606
nxp:NX_Q9NR46-1	395	0	43928.6	5	14	0.1342	Endophilin-B2 isoform Iso 1 \Gname=SH3GLB2 \NcbiTaxId=9606
nxp:NX_Q9NR46-2	404	0	44719.9	5	14	0.1312	Endophilin-B2 isoform Iso 2 \Gname=SH3GLB2 \NcbiTaxId=9606
nxp:NX_Q9NSD9-1	589	5	66055.5	5	20	0.0883	Phenylalanine--tRNA ligase beta subunit isoform Iso 1 \Gname=FARSB \NcbiTaxId=9606
nxp:NX_Q9NV96-1	361	0	40639.6	5	51	0.1108	Cell cycle control protein 50A isoform Iso 1 \Gname=TMEM30A \NcbiTaxId=9606
nxp:NX_Q9NV96-2	325	0	36671.9	5	51	0.1231	Cell cycle control protein 50A isoform Iso 3 \Gname=TMEM30A \NcbiTaxId=9606
nxp:NX_Q9NX63-1	227	5	26118.2	5	39	0.2467	Coiled-coil-helix-coiled-coil-helix domain-containing protein 3. mitochondrial isoform Iso 1 \Gname=CHCHD3 \NcbiTaxId=9606
nxp:NX_Q9NZQ3-1	722	0	78892.1	5	19	0.0776	NCK-interacting protein with SH3 domain isoform Iso 1 \Gname=NCKIPSD \NcbiTaxId=9606
nxp:NX_Q9NZQ3-2	722	0	77863.6	5	19	0.0776	NCK-interacting protein with SH3 domain isoform Iso 2 \Gname=NCKIPSD \NcbiTaxId=9606
nxp:NX_Q9NZQ3-3	715	0	78169.7	5	19	0.0783	NCK-interacting protein with SH3 domain isoform Iso 3 \Gname=NCKIPSD \NcbiTaxId=9606
nxp:NX_Q9NZQ3-4	651	0	70477.8	5	19	0.086	NCK-interacting protein with SH3 domain isoform Iso 4 \Gname=NCKIPSD \NcbiTaxId=9606
nxp:NX_Q9P1F3-1	81	5	9032.9	5	24	0.5432	Costars family protein ABRACL isoform Iso 1 \Gname=ABRACL \NcbiTaxId=9606
nxp:NX_Q9P289-2	339	0	37728.2	5	8	0.1858	Serine/threonine-protein kinase MST4 isoform Iso 2 \Gname=MST4 \NcbiTaxId=9606
nxp:NX_Q9UBS4-1	358	5	40470.6	5	14	0.1872	DnaJ homolog subfamily B member 11 isoform Iso 1 \Gname=DNAJB11 \NcbiTaxId=9606
nxp:NX_Q9UIJ7-2	158	0	18293.6	5	20	0.4114	GTP:AMP phosphotransferase AK3. mitochondrial isoform Iso 2 \Gname=AK3 \NcbiTaxId=9606
nxp:NX_Q9UJZ1-1	356	5	38492.2	5	21	0.2022	Stomatin-like protein 2. mitochondrial isoform Iso 1 \Gname=STOML2 \NcbiTaxId=9606
nxp:NX_Q9UL25-1	225	5	24314.2	5	27	0.1956	Ras-related protein Rab-21 isoform Iso 1 \Gname=RAB21 \NcbiTaxId=9606
nxp:NX_Q9UMY4-1	172	0	19700.1	5	21	0.2558	Sorting nexin-12 isoform Iso 1 \Gname=SNX12 \NcbiTaxId=9606
nxp:NX_Q9UMY4-2	162	0	18854.7	5	21	0.2716	Sorting nexin-12 isoform Iso 2 \Gname=SNX12 \NcbiTaxId=9606
nxp:NX_Q9UMY4-3	158	0	18312.4	5	21	0.2785	Sorting nexin-12 isoform Iso 3 \Gname=SNX12 \NcbiTaxId=9606
nxp:NX_Q9UNM6-2	378	0	42897.1	5	8	0.1667	26S proteasome non-ATPase regulatory subunit 13 isoform Iso 2 \Gname=PSMD13 \NcbiTaxId=9606
nxp:NX_Q9UPU5-1	2620	5	294160.2	5	5	0.024	Ubiquitin carboxyl-terminal hydrolase 24 isoform Iso 1 \Gname=USP24 \NcbiTaxId=9606
nxp:NX_Q9Y262-1	564	2	66666.4	5	12	0.0851	Eukaryotic translation initiation factor 3 subunit L isoform Iso 1 \Gname=EIF3L \NcbiTaxId=9606
nxp:NX_Q9Y2L6-1	1034	5	117955.5	5	9	0.0667	FERM domain-containing protein 4B isoform Iso 2 \Gname=FRMD4B \NcbiTaxId=9606
nxp:NX_Q9Y2Q3-1	226	0	25462.3	5	46	0.2522	Glutathione S-transferase kappa 1 isoform Iso 1 \Gname=GSTK1 \NcbiTaxId=9606
nxp:NX_Q9Y2Q3-2	282	0	31527.5	5	46	0.2021	Glutathione S-transferase kappa 1 isoform Iso 2 \Gname=GSTK1 \NcbiTaxId=9606
nxp:NX_Q9Y512-1	469	5	51925.3	5	11	0.1237	Sorting and assembly machinery component 50 homolog isoform Iso 1 \Gname=SAMM50 \NcbiTaxId=9606
nxp:NX_Q9Y5P6-1	360	0	39790.6	5	42	0.2167	Mannose-1-phosphate guanyltransferase beta isoform Iso 1 \Gname=GMPPB \NcbiTaxId=9606
nxp:NX_Q9Y5P6-2	387	0	42575.9	5	42	0.2016	Mannose-1-phosphate guanyltransferase beta isoform Iso 2 \Gname=GMPPB \NcbiTaxId=9606
nxp:NX_Q9Y6K5-1	1087	5	121075	5	8	0.0524	2'-5'-oligoadenylate synthase 3 isoform Iso 1 \Gname=OAS3 \NcbiTaxId=9606
nxp:NX_Q9Y6W5-1	498	5	54232.4	5	60	0.1365	Wiskott-Aldrich syndrome protein family member 2 isoform Iso 1 \Gname=WASF2 \NcbiTaxId=9606
nxp:NX_B9A064-1	214	0	23030.6	4	30	0.2523	Ig lambda-1 chain C regions isoform Iso 1 \Gname=IGLC1 \NcbiTaxId=9606
nxp:NX_O00154-1	380	0	41751.3	4	36	0.1421	Cytosolic acyl coenzyme A thioester hydrolase isoform Iso 1 \Gname=ACOT7 \NcbiTaxId=9606
nxp:NX_O00154-5	350	0	38948	4	36	0.1543	Cytosolic acyl coenzyme A thioester hydrolase isoform Iso 5 \Gname=ACOT7 \NcbiTaxId=9606
nxp:NX_O00154-6	329	0	36526.6	4	36	0.1641	Cytosolic acyl coenzyme A thioester hydrolase isoform Iso 6 \Gname=ACOT7 \NcbiTaxId=9606
nxp:NX_O00154-7	370	0	40411.5	4	36	0.1459	Cytosolic acyl coenzyme A thioester hydrolase isoform Iso 4 \Gname=ACOT7 \NcbiTaxId=9606
nxp:NX_O00233-1	223	0	24648.5	4	20	0.1883	26S proteasome non-ATPase regulatory subunit 9 isoform p27-L \Gname=PSMD9 \NcbiTaxId=9606
nxp:NX_O00233-2	209	0	22732.3	4	20	0.201	26S proteasome non-ATPase regulatory subunit 9 isoform p27-S \Gname=PSMD9 \NcbiTaxId=9606
nxp:NX_O00483-1	81	4	9345.9	4	24	0.4691	NADH dehydrogenase [ubiquinone] 1 alpha subcomplex subunit 4 isoform Iso 1 \Gname=NDUFA4 \NcbiTaxId=9606
nxp:NX_O00571-1	662	0	73180	4	37	0.0831	ATP-dependent RNA helicase DDX3X isoform Iso 1 \Gname=DDX3X \NcbiTaxId=9606
nxp:NX_O00571-2	646	0	71292.9	4	37	0.0851	ATP-dependent RNA helicase DDX3X isoform Iso 2 \Gname=DDX3X \NcbiTaxId=9606
nxp:NX_O00743-1	305	0	35103.5	4	20	0.1115	Serine/threonine-protein phosphatase 6 catalytic subunit isoform Iso 1 \Gname=PPP6C \NcbiTaxId=9606
nxp:NX_O00743-2	283	0	32493.3	4	20	0.1201	Serine/threonine-protein phosphatase 6 catalytic subunit isoform Iso 2 \Gname=PPP6C \NcbiTaxId=9606
nxp:NX_O00743-3	342	0	38903.5	4	20	0.0994	Serine/threonine-protein phosphatase 6 catalytic subunit isoform Iso 3 \Gname=PPP6C \NcbiTaxId=9606
nxp:NX_O14773-1	563	4	61191.6	4	49	0.0675	Tripeptidyl-peptidase 1 isoform Iso 2 \Gname=TPP1 \NcbiTaxId=9606
nxp:NX_O14964-1	777	0	86119.5	4	46	0.0592	Hepatocyte growth factor-regulated tyrosine kinase substrate isoform Iso 1 \Gname=HGS \NcbiTaxId=9606
nxp:NX_O14964-2	690	0	76309.6	4	46	0.0667	Hepatocyte growth factor-regulated tyrosine kinase substrate isoform Iso 2 \Gname=HGS \NcbiTaxId=9606
nxp:NX_O15427-1	465	4	49418.9	4	32	0.0882	Monocarboxylate transporter 4 isoform Iso 1 \Gname=SLC16A3 \NcbiTaxId=9606
nxp:NX_O15533-1	448	0	47577.7	4	23	0.154	Tapasin isoform Iso 1 \Gname=TAPBP \NcbiTaxId=9606
nxp:NX_O15533-2	412	0	43839.6	4	23	0.1675	Tapasin isoform Iso 2 \Gname=TAPBP \NcbiTaxId=9606
nxp:NX_O15533-3	504	0	53890.8	4	23	0.1369	Tapasin isoform Iso 3 \Gname=TAPBP \NcbiTaxId=9606
nxp:NX_O43169-1	146	4	16304	4	15	0.3562	Cytochrome b5 type B isoform Iso 1 \Gname=CYB5B \NcbiTaxId=9606
nxp:NX_O43399-2	186	0	19871.1	4	50	0.2634	Tumor protein D54 isoform Iso 2 \Gname=TPD52L2 \NcbiTaxId=9606
nxp:NX_O43399-3	209	0	22485.3	4	50	0.2344	Tumor protein D54 isoform Iso 3 \Gname=TPD52L2 \NcbiTaxId=9606
nxp:NX_O43399-4	200	0	21418.8	4	50	0.245	Tumor protein D54 isoform Iso 4 \Gname=TPD52L2 \NcbiTaxId=9606
nxp:NX_O43399-6	163	0	17444.9	4	50	0.3006	Tumor protein D54 isoform Iso 6 \Gname=TPD52L2 \NcbiTaxId=9606
nxp:NX_O43493-1	480	0	51064.4	4	12	0.1229	Trans-Golgi network integral membrane protein 2 isoform TGN51 \Gname=TGOLN2 \NcbiTaxId=9606
nxp:NX_O43493-2	437	0	45834.5	4	12	0.135	Trans-Golgi network integral membrane protein 2 isoform TGN46 \Gname=TGOLN2 \NcbiTaxId=9606
nxp:NX_O43493-3	453	0	47651.4	4	12	0.1302	Trans-Golgi network integral membrane protein 2 isoform TGN48 \Gname=TGOLN2 \NcbiTaxId=9606
nxp:NX_O43493-5	447	0	47012.1	4	12	0.132	Trans-Golgi network integral membrane protein 2 isoform Iso 5 \Gname=TGOLN2 \NcbiTaxId=9606
nxp:NX_O43615-1	452	4	51305.4	4	11	0.0951	Mitochondrial import inner membrane translocase subunit TIM44 isoform Iso 1 \Gname=TIMM44 \NcbiTaxId=9606
nxp:NX_O43768-1	121	0	13362.7	4	29	0.3636	Alpha-endosulfine isoform Iso 2 \Gname=ENSA \NcbiTaxId=9606
nxp:NX_O43768-3	137	0	15253.6	4	29	0.3212	Alpha-endosulfine isoform Iso 9 \Gname=ENSA \NcbiTaxId=9606
nxp:NX_O43768-4	140	0	15506	4	29	0.3143	Alpha-endosulfine isoform Iso 4 \Gname=ENSA \NcbiTaxId=9606
nxp:NX_O43768-5	117	0	12791.5	4	29	0.3761	Alpha-endosulfine isoform Iso 6 \Gname=ENSA \NcbiTaxId=9606
nxp:NX_O43768-7	133	0	14682.3	4	29	0.3308	Alpha-endosulfine isoform Iso 7 \Gname=ENSA \NcbiTaxId=9606
nxp:NX_O43852-4	323	0	38036.9	4	66	0.1269	Calumenin isoform Iso 2 \Gname=CALU \NcbiTaxId=9606
nxp:NX_O43852-5	229	0	26856.9	4	11	0.1834	Calumenin isoform Iso 5 \Gname=CALU \NcbiTaxId=9606
nxp:NX_O60234-1	142	4	16772.4	4	27	0.162	Glia maturation factor gamma isoform Iso 1 \Gname=GMFG \NcbiTaxId=9606
nxp:NX_O60256-1	369	0	40881.3	4	14	0.0976	Phosphoribosyl pyrophosphate synthase-associated protein 2 isoform Iso 1 \Gname=PRPSAP2 \NcbiTaxId=9606
nxp:NX_O60256-3	320	0	35506.7	4	14	0.1125	Phosphoribosyl pyrophosphate synthase-associated protein 2 isoform Iso 3 \Gname=PRPSAP2 \NcbiTaxId=9606
nxp:NX_O60282-2	725	0	83108.8	4	15	0.0593	Kinesin heavy chain isoform 5C isoform Iso 2 \Gname=KIF5C \NcbiTaxId=9606
nxp:NX_O60493-2	130	0	14738.6	4	13	0.2769	Sorting nexin-3 isoform Iso 2 \Gname=SNX3 \NcbiTaxId=9606
nxp:NX_O60841-1	1220	4	138723.7	4	15	0.0369	Eukaryotic translation initiation factor 5B isoform Iso 1 \Gname=EIF5B \NcbiTaxId=9606
nxp:NX_O75190-1	326	0	36046.9	4	6	0.1718	DnaJ homolog subfamily B member 6 isoform A \Gname=DNAJB6 \NcbiTaxId=9606
nxp:NX_O75190-3	325	0	35674.5	4	6	0.1723	DnaJ homolog subfamily B member 6 isoform C \Gname=DNAJB6 \NcbiTaxId=9606
nxp:NX_O75915-1	188	4	21582.4	4	33	0.1383	PRA1 family protein 3 isoform Iso 1 \Gname=ARL6IP5 \NcbiTaxId=9606
nxp:NX_O95197-1	1032	0	112523.4	4	18	0.0533	Reticulon-3 isoform Iso 1 \Gname=RTN3 \NcbiTaxId=9606
nxp:NX_O95197-2	1013	0	110565.5	4	18	0.0543	Reticulon-3 isoform Iso 2 \Gname=RTN3 \NcbiTaxId=9606
nxp:NX_O95197-4	255	0	27532.5	4	18	0.2157	Reticulon-3 isoform Iso 4 \Gname=RTN3 \NcbiTaxId=9606
nxp:NX_O95197-7	920	0	100743.7	4	18	0.0598	Reticulon-3 isoform Iso 7 \Gname=RTN3 \NcbiTaxId=9606
nxp:NX_O95292-1	243	3	27193.1	4	131	0.2263	Vesicle-associated membrane protein-associated protein B/C isoform Iso 1 \Gname=VAPB \NcbiTaxId=9606
nxp:NX_O95747-1	527	4	57968	4	7	0.0797	Serine/threonine-protein kinase OSR1 isoform Iso 1 \Gname=OXSR1 \NcbiTaxId=9606
nxp:NX_O95861-1	308	0	33353.2	4	12	0.1234	3'(2').5'-bisphosphate nucleotidase 1 isoform Iso 1 \Gname=BPNT1 \NcbiTaxId=9606
nxp:NX_O95861-2	325	0	35703.3	4	12	0.1169	3'(2').5'-bisphosphate nucleotidase 1 isoform Iso 2 \Gname=BPNT1 \NcbiTaxId=9606
nxp:NX_P00352-1	501	4	54808.9	4	11	0.1078	Retinal dehydrogenase 1 isoform Iso 1 \Gname=ALDH1A1 \NcbiTaxId=9606
nxp:NX_P00403-1	227	4	25530.2	4	23	0.1189	Cytochrome c oxidase subunit 2 isoform Iso 1 \Gname=MT-CO2 \NcbiTaxId=9606
nxp:NX_P01133-1	1207	0	133888.4	4	8	0.0423	Pro-epidermal growth factor isoform Iso 1 \Gname=EGF \NcbiTaxId=9606
nxp:NX_P01133-2	1165	0	129153.3	4	8	0.0438	Pro-epidermal growth factor isoform Iso 2 \Gname=EGF \NcbiTaxId=9606
nxp:NX_P01133-3	1166	0	129643.7	4	8	0.0437	Pro-epidermal growth factor isoform Iso 3 \Gname=EGF \NcbiTaxId=9606
nxp:NX_P01834-1	106	4	11583.7	4	81	0.4811	Ig kappa chain C region isoform Iso 1 \Gname=IGKC \NcbiTaxId=9606
nxp:NX_P02749-1	345	4	38254.6	4	26	0.1507	Beta-2-glycoprotein 1 isoform Iso 1 \Gname=APOH \NcbiTaxId=9606
nxp:NX_P02774-3	493	4	55069.1	4	21	0.0974	Vitamin D-binding protein isoform Iso 2 \Gname=GC \NcbiTaxId=9606
nxp:NX_P04179-2	183	0	20664.5	4	41	0.2514	Superoxide dismutase [Mn]. mitochondrial isoform Iso 2 \Gname=SOD2 \NcbiTaxId=9606
nxp:NX_P04217-1	495	4	54201.5	4	7	0.1172	Alpha-1B-glycoprotein isoform Iso 2 \Gname=A1BG \NcbiTaxId=9606
nxp:NX_P04424-1	464	0	51607.3	4	36	0.1228	Argininosuccinate lyase isoform Iso 1 \Gname=ASL \NcbiTaxId=9606
nxp:NX_P04424-2	444	0	49460.2	4	36	0.1284	Argininosuccinate lyase isoform Iso 2 \Gname=ASL \NcbiTaxId=9606
nxp:NX_P07108-1	87	0	10020	4	24	0.4138	Acyl-CoA-binding protein isoform Iso 1 \Gname=DBI \NcbiTaxId=9606
nxp:NX_P07108-2	104	0	11767.9	4	24	0.3462	Acyl-CoA-binding protein isoform Iso 2 \Gname=DBI \NcbiTaxId=9606
nxp:NX_P07108-3	88	0	10120.1	4	24	0.4091	Acyl-CoA-binding protein isoform Iso 3 \Gname=DBI \NcbiTaxId=9606
nxp:NX_P09382-1	135	4	14688.2	4	56	0.3185	Galectin-1 isoform Iso 1 \Gname=LGALS1 \NcbiTaxId=9606
nxp:NX_P09960-1	611	0	69223.2	4	8	0.0835	Leukotriene A-4 hydrolase isoform Iso 1 \Gname=LTA4H \NcbiTaxId=9606
nxp:NX_P09960-2	532	0	59677.2	4	8	0.0959	Leukotriene A-4 hydrolase isoform Iso 2 \Gname=LTA4H \NcbiTaxId=9606
nxp:NX_P09960-3	508	0	57245.3	4	8	0.1004	Leukotriene A-4 hydrolase isoform Iso 3 \Gname=LTA4H \NcbiTaxId=9606
nxp:NX_P09960-4	587	0	66791.3	4	8	0.0869	Leukotriene A-4 hydrolase isoform Iso 4 \Gname=LTA4H \NcbiTaxId=9606
nxp:NX_P09972-1	364	1	39413.2	4	8	0.1401	Fructose-bisphosphate aldolase C isoform Iso 1 \Gname=ALDOC \NcbiTaxId=9606
nxp:NX_P0CF74-1	106	0	11251.5	4	43	0.5094	Ig lambda-6 chain C region isoform Iso 1 \Gname=IGLC6 \NcbiTaxId=9606
nxp:NX_P0CG06-1	106	0	11212.5	4	43	0.5094	Ig lambda-3 chain C regions isoform Iso 1 \Gname=IGLC3 \NcbiTaxId=9606
nxp:NX_P10301-1	218	4	23447.9	4	33	0.2798	Ras-related protein R-Ras isoform Iso 1 \Gname=RRAS \NcbiTaxId=9606
nxp:NX_P10314-1	365	0	41004.2	4	5	0.1397	HLA class I histocompatibility antigen. A-32 alpha chain isoform Iso 1 \Gname=HLA-A \NcbiTaxId=9606
nxp:NX_P11055-1	1940	0	223748.4	4	7	0.0155	Myosin-3 isoform Iso 1 \Gname=MYH3 \NcbiTaxId=9606
nxp:NX_P11233-1	206	1	23534	4	22	0.1602	Ras-related protein Ral-A isoform Iso 1 \Gname=RALA \NcbiTaxId=9606
nxp:NX_P12074-1	109	4	12129.1	4	16	0.3303	Cytochrome c oxidase subunit 6A1. mitochondrial isoform Iso 1 \Gname=COX6A1 \NcbiTaxId=9606
nxp:NX_P12318-1	317	0	34960.5	4	19	0.164	Low affinity immunoglobulin gamma Fc region receptor II-a isoform Iso 1 \Gname=FCGR2A \NcbiTaxId=9606
nxp:NX_P12318-2	316	0	34889.4	4	19	0.1646	Low affinity immunoglobulin gamma Fc region receptor II-a isoform Iso 2 \Gname=FCGR2A \NcbiTaxId=9606
nxp:NX_P12883-1	1935	0	222940.7	4	7	0.0155	Myosin-7 isoform Iso 1 \Gname=MYH7 \NcbiTaxId=9606
nxp:NX_P12955-1	493	0	54494.9	4	10	0.1237	Xaa-Pro dipeptidase isoform Iso 1 \Gname=PEPD \NcbiTaxId=9606
nxp:NX_P12955-3	429	0	47212.4	4	10	0.1422	Xaa-Pro dipeptidase isoform Iso 3 \Gname=PEPD \NcbiTaxId=9606
nxp:NX_P13073-1	169	4	19546	4	73	0.1716	Cytochrome c oxidase subunit 4 isoform 1. mitochondrial isoform Iso 1 \Gname=COX4I1 \NcbiTaxId=9606
nxp:NX_P13598-1	275	4	30616.6	4	66	0.1527	Intercellular adhesion molecule 2 isoform Iso 1 \Gname=ICAM2 \NcbiTaxId=9606
nxp:NX_P14550-1	325	4	36531.8	4	14	0.1446	Alcohol dehydrogenase [NADP(+)] isoform Iso 1 \Gname=AKR1A1 \NcbiTaxId=9606
nxp:NX_P15121-1	316	4	35812.5	4	29	0.1392	Aldose reductase isoform Iso 1 \Gname=AKR1B1 \NcbiTaxId=9606
nxp:NX_P17174-1	413	4	46200.5	4	13	0.1913	Aspartate aminotransferase. cytoplasmic isoform Iso 1 \Gname=GOT1 \NcbiTaxId=9606
nxp:NX_P18084-1	799	4	87978.2	4	24	0.0526	Integrin beta-5 isoform Iso 1 \Gname=ITGB5 \NcbiTaxId=9606
nxp:NX_P20338-1	218	4	24356.2	4	43	0.2156	Ras-related protein Rab-4A isoform Iso 1 \Gname=RAB4A \NcbiTaxId=9606
nxp:NX_P20591-2	508	0	55608.6	4	7	0.0906	Interferon-induced GTP-binding protein Mx1 isoform Iso 2 \Gname=MX1 \NcbiTaxId=9606
nxp:NX_P20618-1	241	4	26454.4	4	69	0.2075	Proteasome subunit beta type-1 isoform Iso 1 \Gname=PSMB1 \NcbiTaxId=9606
nxp:NX_P23919-1	212	4	23786.5	4	4	0.1887	Thymidylate kinase isoform Iso 1 \Gname=DTYMK \NcbiTaxId=9606
nxp:NX_P24666-1	158	1	18012.8	4	11	0.2658	Low molecular weight phosphotyrosine protein phosphatase isoform Iso 1 \Gname=ACP1 \NcbiTaxId=9606
nxp:NX_P25788-1	255	0	28397.1	4	55	0.1529	Proteasome subunit alpha type-3 isoform Iso 1 \Gname=PSMA3 \NcbiTaxId=9606
nxp:NX_P25788-2	248	0	27611.7	4	55	0.1573	Proteasome subunit alpha type-3 isoform Iso 2 \Gname=PSMA3 \NcbiTaxId=9606
nxp:NX_P26885-1	142	4	15621.3	4	6	0.2746	Peptidyl-prolyl cis-trans isomerase FKBP2 isoform Iso 1 \Gname=FKBP2 \NcbiTaxId=9606
nxp:NX_P28072-1	239	4	25323.4	4	59	0.1757	Proteasome subunit beta type-6 isoform Iso 1 \Gname=PSMB6 \NcbiTaxId=9606
nxp:NX_P28161-2	191	0	22611.3	4	29	0.2723	Glutathione S-transferase Mu 2 isoform Iso 2 \Gname=GSTM2 \NcbiTaxId=9606
nxp:NX_P29122-4	652	0	71707.8	4	29	0.0644	Proprotein convertase subtilisin/kexin type 6 isoform PACE4C \Gname=PCSK6 \NcbiTaxId=9606
nxp:NX_P29122-5	623	0	68177	4	29	0.0674	Proprotein convertase subtilisin/kexin type 6 isoform PACE4CS \Gname=PCSK6 \NcbiTaxId=9606
nxp:NX_P29122-6	497	0	54847.1	4	29	0.0845	Proprotein convertase subtilisin/kexin type 6 isoform PACE4D \Gname=PCSK6 \NcbiTaxId=9606
nxp:NX_P29218-2	198	0	21923.1	4	10	0.3333	Inositol monophosphatase 1 isoform Iso 2 \Gname=IMPA1 \NcbiTaxId=9606
nxp:NX_P30084-1	290	4	31349.1	4	16	0.1793	Enoyl-CoA hydratase. mitochondrial isoform Iso 1 \Gname=ECHS1 \NcbiTaxId=9606
nxp:NX_P30273-1	86	4	9643.3	4	99	0.3953	High affinity immunoglobulin epsilon receptor subunit gamma isoform Iso 1 \Gname=FCER1G \NcbiTaxId=9606
nxp:NX_P30459-1	365	0	40847.1	4	5	0.1397	HLA class I histocompatibility antigen. A-74 alpha chain isoform Iso 1 \Gname=HLA-A \NcbiTaxId=9606
nxp:NX_P31995-1	323	0	35537.8	4	19	0.161	Low affinity immunoglobulin gamma Fc region receptor II-c isoform IIC1 \Gname=FCGR2C \NcbiTaxId=9606
nxp:NX_P35613-2	269	4	29184.7	4	30	0.1933	Basigin isoform Iso 2 \Gname=BSG \NcbiTaxId=9606
nxp:NX_P35914-2	254	0	26874	4	40	0.1693	Hydroxymethylglutaryl-CoA lyase. mitochondrial isoform Iso 2 \Gname=HMGCL \NcbiTaxId=9606
nxp:NX_P35914-3	191	0	20190.7	4	40	0.2251	Hydroxymethylglutaryl-CoA lyase. mitochondrial isoform Iso 3 \Gname=HMGCL \NcbiTaxId=9606
nxp:NX_P35998-1	433	4	48585.1	4	16	0.0993	26S protease regulatory subunit 7 isoform Iso 1 \Gname=PSMC2 \NcbiTaxId=9606
nxp:NX_P36969-1	197	4	22143	4	24	0.2335	Phospholipid hydroperoxide glutathione peroxidase. mitochondrial isoform Cytoplasmic \Gname=GPX4 \NcbiTaxId=9606
nxp:NX_P42025-1	376	1	42248.7	4	17	0.1383	Beta-centractin isoform Iso 1 \Gname=ACTR1B \NcbiTaxId=9606
nxp:NX_P46379-1	1132	0	119316	4	7	0.0415	Large proline-rich protein BAG6 isoform Iso 1 \Gname=BAG6 \NcbiTaxId=9606
nxp:NX_P46379-2	1126	0	118600.6	4	7	0.0417	Large proline-rich protein BAG6 isoform Iso 2 \Gname=BAG6 \NcbiTaxId=9606
nxp:NX_P46379-3	1162	0	122247.5	4	7	0.0404	Large proline-rich protein BAG6 isoform Iso 3 \Gname=BAG6 \NcbiTaxId=9606
nxp:NX_P46379-4	903	0	96720.9	4	7	0.052	Large proline-rich protein BAG6 isoform Iso 4 \Gname=BAG6 \NcbiTaxId=9606
nxp:NX_P46379-5	1077	0	113366.9	4	7	0.0436	Large proline-rich protein BAG6 isoform Iso 5 \Gname=BAG6 \NcbiTaxId=9606
nxp:NX_P46940-1	1657	2	189115.8	4	8	0.0223	Ras GTPase-activating-like protein IQGAP1 isoform Iso 1 \Gname=IQGAP1 \NcbiTaxId=9606
nxp:NX_P48509-1	253	4	28258.3	4	51	0.1739	CD151 antigen isoform Iso 1 \Gname=CD151 \NcbiTaxId=9606
nxp:NX_P49448-1	558	0	61377.4	4	5	0.0842	Glutamate dehydrogenase 2. mitochondrial isoform Iso 1 \Gname=GLUD2 \NcbiTaxId=9606
nxp:NX_P49619-2	766	0	86228.4	4	7	0.0692	Diacylglycerol kinase gamma isoform Iso 2 \Gname=DGKG \NcbiTaxId=9606
nxp:NX_P49821-1	464	0	50766.8	4	6	0.0733	NADH dehydrogenase [ubiquinone] flavoprotein 1. mitochondrial isoform Iso 1 \Gname=NDUFV1 \NcbiTaxId=9606
nxp:NX_P49821-2	455	0	49818.3	4	6	0.0747	NADH dehydrogenase [ubiquinone] flavoprotein 1. mitochondrial isoform Iso 2 \Gname=NDUFV1 \NcbiTaxId=9606
nxp:NX_P50452-1	374	0	42721.2	4	57	0.0802	Serpin B8 isoform Iso 1 \Gname=SERPINB8 \NcbiTaxId=9606
nxp:NX_P51575-1	399	4	44933.1	4	6	0.1378	P2X purinoceptor 1 isoform Iso 1 \Gname=P2RX1 \NcbiTaxId=9606
nxp:NX_P51970-1	172	4	20074.1	4	11	0.3023	NADH dehydrogenase [ubiquinone] 1 alpha subcomplex subunit 8 isoform Iso 1 \Gname=NDUFA8 \NcbiTaxId=9606
nxp:NX_P52597-1	415	4	45624.8	4	39	0.1446	Heterogeneous nuclear ribonucleoprotein F isoform Iso 1 \Gname=HNRNPF \NcbiTaxId=9606
nxp:NX_P53990-3	360	0	39883.9	4	9	0.1056	IST1 homolog isoform Iso 3 \Gname=IST1 \NcbiTaxId=9606
nxp:NX_P54619-1	331	0	37537.8	4	5	0.1208	5'-AMP-activated protein kinase subunit gamma-1 isoform Iso 2 \Gname=PRKAG1 \NcbiTaxId=9606
nxp:NX_P54619-3	340	0	38490.3	4	5	0.1176	5'-AMP-activated protein kinase subunit gamma-1 isoform Iso 3 \Gname=PRKAG1 \NcbiTaxId=9606
nxp:NX_P56192-1	900	4	101033.9	4	17	0.0589	Methionine--tRNA ligase. cytoplasmic isoform Iso 1 \Gname=MARS \NcbiTaxId=9606
nxp:NX_P61020-2	174	0	19060.4	4	10	0.2529	Ras-related protein Rab-5B isoform Iso 2 \Gname=RAB5B \NcbiTaxId=9606
nxp:NX_P61081-1	183	4	20868.6	4	4	0.224	NEDD8-conjugating enzyme Ubc12 isoform Iso 1 \Gname=UBE2M \NcbiTaxId=9606
nxp:NX_P61086-1	200	4	22374.6	4	26	0.27	Ubiquitin-conjugating enzyme E2 K isoform Iso 1 \Gname=UBE2K \NcbiTaxId=9606
nxp:NX_P61960-1	85	4	9093.9	4	25	0.6824	Ubiquitin-fold modifier 1 isoform Iso 1 \Gname=UFM1 \NcbiTaxId=9606
nxp:NX_P62136-3	286	0	32556.1	4	5	0.0979	Serine/threonine-protein phosphatase PP1-alpha catalytic subunit isoform Iso 3 \Gname=PPP1CA \NcbiTaxId=9606
nxp:NX_P67775-2	255	0	29697.7	4	47	0.1882	Serine/threonine-protein phosphatase 2A catalytic subunit alpha isoform isoform Iso 2 \Gname=PPP2CA \NcbiTaxId=9606
nxp:NX_P68402-1	229	4	25535.1	4	54	0.1921	Platelet-activating factor acetylhydrolase IB subunit beta isoform Iso 1 \Gname=PAFAH1B2 \NcbiTaxId=9606
nxp:NX_P78356-1	416	0	47329.8	4	15	0.0817	Phosphatidylinositol 5-phosphate 4-kinase type-2 beta isoform Iso 1 \Gname=PIP4K2B \NcbiTaxId=9606
nxp:NX_P84074-1	193	0	22395	4	67	0.2021	Neuron-specific calcium-binding protein hippocalcin isoform Iso 1 \Gname=HPCA \NcbiTaxId=9606
nxp:NX_Q00577-1	322	4	34871.4	4	14	0.1242	Transcriptional activator protein Pur-alpha isoform Iso 1 \Gname=PURA \NcbiTaxId=9606
nxp:NX_Q12841-1	308	4	34944.8	4	12	0.1234	Follistatin-related protein 1 isoform Iso 1 \Gname=FSTL1 \NcbiTaxId=9606
nxp:NX_Q13347-1	325	4	36460.6	4	40	0.1569	Eukaryotic translation initiation factor 3 subunit I isoform Iso 1 \Gname=EIF3I \NcbiTaxId=9606
nxp:NX_Q13404-1	221	0	25762	4	30	0.1584	Ubiquitin-conjugating enzyme E2 variant 1 isoform Iso 1 \Gname=UBE2V1 \NcbiTaxId=9606
nxp:NX_Q13404-2	170	0	19197.7	4	30	0.2059	Ubiquitin-conjugating enzyme E2 variant 1 isoform Iso 2 \Gname=UBE2V1 \NcbiTaxId=9606
nxp:NX_Q13404-4	147	0	16466.3	4	30	0.2381	Ubiquitin-conjugating enzyme E2 variant 1 isoform Iso 3 \Gname=UBE2V1 \NcbiTaxId=9606
nxp:NX_Q13404-7	170	0	19276.8	4	30	0.2059	Ubiquitin-conjugating enzyme E2 variant 1 isoform Iso 5 \Gname=UBE2V1 \NcbiTaxId=9606
nxp:NX_Q13618-1	768	2	88855.4	4	7	0.0521	Cullin-3 isoform Iso 2 \Gname=CUL3 \NcbiTaxId=9606
nxp:NX_Q14258-1	630	4	70909.7	4	12	0.0825	E3 ubiquitin/ISG15 ligase TRIM25 isoform Iso 1 \Gname=TRIM25 \NcbiTaxId=9606
nxp:NX_Q14392-1	662	4	71915.6	4	9	0.0906	Leucine-rich repeat-containing protein 32 isoform Iso 1 \Gname=LRRC32 \NcbiTaxId=9606
nxp:NX_Q14409-1	553	0	60540.7	4	13	0.1121	Putative glycerol kinase 3 isoform Iso 1 \Gname=GK3P \NcbiTaxId=9606
nxp:NX_Q15126-1	192	4	21963.2	4	6	0.2344	Phosphomevalonate kinase isoform Iso 1 \Gname=PMVK \NcbiTaxId=9606
nxp:NX_Q15208-1	465	4	54137.4	4	9	0.1097	Serine/threonine-protein kinase 38 isoform Iso 1 \Gname=STK38 \NcbiTaxId=9606
nxp:NX_Q15370-1	118	0	13106.5	4	17	0.3814	Transcription elongation factor B polypeptide 2 isoform Iso 1 \Gname=TCEB2 \NcbiTaxId=9606
nxp:NX_Q15370-2	161	0	17881.8	4	17	0.2795	Transcription elongation factor B polypeptide 2 isoform Iso 2 \Gname=TCEB2 \NcbiTaxId=9606
nxp:NX_Q15435-1	360	2	41520.5	4	21	0.1167	Protein phosphatase 1 regulatory subunit 7 isoform Iso 1 \Gname=PPP1R7 \NcbiTaxId=9606
nxp:NX_Q15819-1	145	2	16334.2	4	11	0.2414	Ubiquitin-conjugating enzyme E2 variant 2 isoform Iso 1 \Gname=UBE2V2 \NcbiTaxId=9606
nxp:NX_Q16795-1	377	4	42464.6	4	20	0.1194	NADH dehydrogenase [ubiquinone] 1 alpha subcomplex subunit 9. mitochondrial isoform Iso 1 \Gname=NDUFA9 \NcbiTaxId=9606
nxp:NX_Q5JXB2-1	153	0	17348.1	4	48	0.2549	Putative ubiquitin-conjugating enzyme E2 N-like isoform Iso 1 \Gname=UBE2NL \NcbiTaxId=9606
nxp:NX_Q5VW32-1	411	4	46428.6	4	30	0.1338	BRO1 domain-containing protein BROX isoform Iso 1 \Gname=BROX \NcbiTaxId=9606
nxp:NX_Q5VY43-1	1037	4	110572.6	4	17	0.0579	Platelet endothelial aggregation receptor 1 isoform Iso 1 \Gname=PEAR1 \NcbiTaxId=9606
nxp:NX_Q5W0V3-1	765	0	86485.1	4	6	0.0667	Protein FAM160B1 isoform Iso 1 \Gname=FAM160B1 \NcbiTaxId=9606
nxp:NX_Q5W0V3-2	738	0	83663.5	4	6	0.0691	Protein FAM160B1 isoform Iso 2 \Gname=FAM160B1 \NcbiTaxId=9606
nxp:NX_Q6IAA8-1	161	4	17715.8	4	36	0.323	Ragulator complex protein LAMTOR1 isoform Iso 1 \Gname=LAMTOR1 \NcbiTaxId=9606
nxp:NX_Q6PJW8-2	616	0	67481.2	4	15	0.0763	Consortin isoform Iso 2 \Gname=CNST \NcbiTaxId=9606
nxp:NX_Q6VY07-1	963	0	104815.4	4	17	0.0509	Phosphofurin acidic cluster sorting protein 1 isoform Iso 1 \Gname=PACS1 \NcbiTaxId=9606
nxp:NX_Q6VY07-2	1008	0	109256.5	4	17	0.0486	Phosphofurin acidic cluster sorting protein 1 isoform Iso 2 \Gname=PACS1 \NcbiTaxId=9606
nxp:NX_Q6YHK3-2	1368	0	152548.4	4	11	0.0358	CD109 antigen isoform Iso 2 \Gname=CD109 \NcbiTaxId=9606
nxp:NX_Q6ZUX7-1	228	4	24451.3	4	38	0.1974	Lipoma HMGIC fusion partner-like 2 protein isoform Iso 1 \Gname=LHFPL2 \NcbiTaxId=9606
nxp:NX_Q6ZVM7-1	507	2	55503.7	4	11	0.1243	TOM1-like protein 2 isoform Iso 1 \Gname=TOM1L2 \NcbiTaxId=9606
nxp:NX_Q7L1W4-1	858	4	98120.2	4	19	0.0641	Leucine-rich repeat-containing protein 8D isoform Iso 1 \Gname=LRRC8D \NcbiTaxId=9606
nxp:NX_Q86XR7-2	404	0	46125.5	4	20	0.1163	TIR domain-containing adapter molecule 2 isoform Iso 2 \Gname=TICAM2 \NcbiTaxId=9606
nxp:NX_Q8N490-1	385	0	42831	4	11	0.1143	Probable hydrolase PNKD isoform Iso 1 \Gname=PNKD \NcbiTaxId=9606
nxp:NX_Q8N490-3	361	0	40703	4	11	0.1219	Probable hydrolase PNKD isoform Iso 3 \Gname=PNKD \NcbiTaxId=9606
nxp:NX_Q8N490-4	325	0	36807.6	4	11	0.1354	Probable hydrolase PNKD isoform Iso 4 \Gname=PNKD \NcbiTaxId=9606
nxp:NX_Q8N5J2-3	517	4	56937.2	4	36	0.1277	Protein FAM63A isoform Iso 2 \Gname=FAM63A \NcbiTaxId=9606
nxp:NX_Q8N9U0-1	490	0	55231.3	4	13	0.0959	Tandem C2 domains nuclear protein isoform Iso 1 \Gname=TC2N \NcbiTaxId=9606
nxp:NX_Q8N9U0-2	426	0	47899.5	4	13	0.1103	Tandem C2 domains nuclear protein isoform Iso 2 \Gname=TC2N \NcbiTaxId=9606
nxp:NX_Q8NBX0-1	429	4	47103.4	4	27	0.1096	Saccharopine dehydrogenase-like oxidoreductase isoform Iso 1 \Gname=SCCPDH \NcbiTaxId=9606
nxp:NX_Q8NFP9-1	2946	1	327596.1	4	5	0.016	Neurobeachin isoform Iso 3 \Gname=NBEA \NcbiTaxId=9606
nxp:NX_Q8TAT6-1	608	0	68058.9	4	16	0.0921	Nuclear protein localization protein 4 homolog isoform Iso 1 \Gname=NPLOC4 \NcbiTaxId=9606
nxp:NX_Q8TAT6-2	617	0	69399	4	16	0.0908	Nuclear protein localization protein 4 homolog isoform Iso 2 \Gname=NPLOC4 \NcbiTaxId=9606
nxp:NX_Q8TCJ2-1	826	4	93595.7	4	6	0.0521	Dolichyl-diphosphooligosaccharide--protein glycosyltransferase subunit STT3B isoform Iso 1 \Gname=STT3B \NcbiTaxId=9606
nxp:NX_Q8TD55-1	490	2	53299.1	4	11	0.102	Pleckstrin homology domain-containing family O member 2 isoform Iso 1 \Gname=PLEKHO2 \NcbiTaxId=9606
nxp:NX_Q8TEA8-1	209	4	23390.9	4	55	0.1866	D-tyrosyl-tRNA(Tyr) deacylase 1 isoform Iso 1 \Gname=DTD1 \NcbiTaxId=9606
nxp:NX_Q8WUW1-2	106	4	12020	4	14	0.2642	Protein BRICK1 isoform Iso 1 \Gname=BRK1 \NcbiTaxId=9606
nxp:NX_Q8WWA1-1	233	0	25461.3	4	38	0.1931	Transmembrane protein 40 isoform Iso 1 \Gname=TMEM40 \NcbiTaxId=9606
nxp:NX_Q92625-1	1134	4	123013.7	4	14	0.0459	Ankyrin repeat and SAM domain-containing protein 1A isoform Iso 1 \Gname=ANKS1A \NcbiTaxId=9606
nxp:NX_Q92747-1	370	1	41524.7	4	5	0.1162	Actin-related protein 2/3 complex subunit 1A isoform Iso 1 \Gname=ARPC1A \NcbiTaxId=9606
nxp:NX_Q92835-1	1189	0	133191.1	4	4	0.037	Phosphatidylinositol 3.4.5-trisphosphate 5-phosphatase 1 isoform Iso 1 \Gname=INPP5D \NcbiTaxId=9606
nxp:NX_Q92835-2	1188	0	133092	4	4	0.037	Phosphatidylinositol 3.4.5-trisphosphate 5-phosphatase 1 isoform Iso 2 \Gname=INPP5D \NcbiTaxId=9606
nxp:NX_Q92835-3	976	0	109207.2	4	4	0.0451	Phosphatidylinositol 3.4.5-trisphosphate 5-phosphatase 1 isoform Iso 3 \Gname=INPP5D \NcbiTaxId=9606
nxp:NX_Q96A00-1	147	0	16664.8	4	16	0.2925	Protein phosphatase 1 regulatory subunit 14A isoform Iso 1 \Gname=PPP1R14A \NcbiTaxId=9606
nxp:NX_Q96A00-2	120	0	13453.3	4	16	0.3583	Protein phosphatase 1 regulatory subunit 14A isoform Iso 2 \Gname=PPP1R14A \NcbiTaxId=9606
nxp:NX_Q96AX2-2	216	0	24136.2	4	8	0.1944	Ras-related protein Rab-37 isoform Iso 2 \Gname=RAB37 \NcbiTaxId=9606
nxp:NX_Q96AX2-3	228	0	25629	4	8	0.1842	Ras-related protein Rab-37 isoform Iso 3 \Gname=RAB37 \NcbiTaxId=9606
nxp:NX_Q96BS2-3	187	0	21489.3	4	18	0.2406	Calcineurin B homologous protein 3 isoform Iso 3 \Gname=TESC \NcbiTaxId=9606
nxp:NX_Q96DZ9-1	223	0	24618.7	4	57	0.1166	CKLF-like MARVEL transmembrane domain-containing protein 5 isoform Iso 1 \Gname=CMTM5 \NcbiTaxId=9606
nxp:NX_Q96DZ9-2	156	0	17415.1	4	57	0.1667	CKLF-like MARVEL transmembrane domain-containing protein 5 isoform Iso 2 \Gname=CMTM5 \NcbiTaxId=9606
nxp:NX_Q96DZ9-3	118	0	13163.8	4	57	0.2203	CKLF-like MARVEL transmembrane domain-containing protein 5 isoform Iso 3 \Gname=CMTM5 \NcbiTaxId=9606
nxp:NX_Q96DZ9-4	74	0	8232.2	4	57	0.3514	CKLF-like MARVEL transmembrane domain-containing protein 5 isoform Iso 4 \Gname=CMTM5 \NcbiTaxId=9606
nxp:NX_Q96DZ9-5	105	0	11457	4	57	0.2476	CKLF-like MARVEL transmembrane domain-containing protein 5 isoform Iso 5 \Gname=CMTM5 \NcbiTaxId=9606
nxp:NX_Q96DZ9-6	125	0	14190.3	4	57	0.208	CKLF-like MARVEL transmembrane domain-containing protein 5 isoform Iso 6 \Gname=CMTM5 \NcbiTaxId=9606
nxp:NX_Q96IJ6-1	420	0	46244.1	4	5	0.131	Mannose-1-phosphate guanyltransferase alpha isoform Iso 1 \Gname=GMPPA \NcbiTaxId=9606
nxp:NX_Q96IJ6-2	473	0	51967.2	4	5	0.1163	Mannose-1-phosphate guanyltransferase alpha isoform Iso 2 \Gname=GMPPA \NcbiTaxId=9606
nxp:NX_Q96RT1-1	1412	0	158182.1	4	55	0.029	Protein LAP2 isoform Iso 1 \Gname=ERBB2IP \NcbiTaxId=9606
nxp:NX_Q96RT1-2	1371	0	153813.1	4	55	0.0299	Protein LAP2 isoform Iso 2 \Gname=ERBB2IP \NcbiTaxId=9606
nxp:NX_Q96RT1-3	1360	0	152540.5	4	55	0.0301	Protein LAP2 isoform Iso 3 \Gname=ERBB2IP \NcbiTaxId=9606
nxp:NX_Q96RT1-4	1346	0	151140.6	4	55	0.0305	Protein LAP2 isoform Iso 4 \Gname=ERBB2IP \NcbiTaxId=9606
nxp:NX_Q96RT1-5	1356	0	152178.3	4	55	0.0302	Protein LAP2 isoform Iso 5 \Gname=ERBB2IP \NcbiTaxId=9606
nxp:NX_Q96RT1-6	1340	0	150490.4	4	55	0.0306	Protein LAP2 isoform Iso 6 \Gname=ERBB2IP \NcbiTaxId=9606
nxp:NX_Q96RT1-7	1302	0	145978.2	4	55	0.0315	Protein LAP2 isoform Iso 7 \Gname=ERBB2IP \NcbiTaxId=9606
nxp:NX_Q96RT1-8	1419	0	158907.5	4	55	0.0289	Protein LAP2 isoform Iso 8 \Gname=ERBB2IP \NcbiTaxId=9606
nxp:NX_Q99805-1	663	4	75707.5	4	57	0.0679	Transmembrane 9 superfamily member 2 isoform Iso 1 \Gname=TM9SF2 \NcbiTaxId=9606
nxp:NX_Q99816-1	390	1	43898.4	4	5	0.141	Tumor susceptibility gene 101 protein isoform Iso 1 \Gname=TSG101 \NcbiTaxId=9606
nxp:NX_Q99832-4	456	0	50302	4	6	0.1206	T-complex protein 1 subunit eta isoform Iso 4 \Gname=CCT7 \NcbiTaxId=9606
nxp:NX_Q99961-3	304	0	34479.6	4	38	0.1283	Endophilin-A2 isoform Iso 3 \Gname=SH3GL1 \NcbiTaxId=9606
nxp:NX_Q9BVJ7-1	150	4	16559.6	4	6	0.3	Dual specificity protein phosphatase 23 isoform Iso 1 \Gname=DUSP23 \NcbiTaxId=9606
nxp:NX_Q9BVK6-1	235	4	27242.2	4	39	0.1702	Transmembrane emp24 domain-containing protein 9 isoform Iso 1 \Gname=TMED9 \NcbiTaxId=9606
nxp:NX_Q9BZF9-2	1403	2	161391.7	4	5	0.0385	Uveal autoantigen with coiled-coil domains and ankyrin repeats isoform Iso 2 \Gname=UACA \NcbiTaxId=9606
nxp:NX_Q9C0E8-1	428	0	47692.2	4	8	0.1215	Protein lunapark isoform Iso 1 \Gname=LNP \NcbiTaxId=9606
nxp:NX_Q9C0E8-2	423	0	47046.9	4	8	0.1229	Protein lunapark isoform Iso 3 \Gname=LNP \NcbiTaxId=9606
nxp:NX_Q9H2M9-1	1393	4	155867.8	4	5	0.0294	Rab3 GTPase-activating protein non-catalytic subunit isoform Iso 1 \Gname=RAB3GAP2 \NcbiTaxId=9606
nxp:NX_Q9H4X1-1	137	0	14531.9	4	83	0.3942	Regulator of cell cycle RGCC isoform Iso 1 \Gname=RGCC \NcbiTaxId=9606
nxp:NX_Q9H4X1-2	117	0	12898.1	4	83	0.4615	Regulator of cell cycle RGCC isoform Iso 2 \Gname=RGCC \NcbiTaxId=9606
nxp:NX_Q9H7M9-1	311	4	33869	4	14	0.119	Platelet receptor Gi24 isoform Iso 1 \Gname=C10orf54 \NcbiTaxId=9606
nxp:NX_Q9HC38-1	313	0	34753.2	4	8	0.1438	Glyoxalase domain-containing protein 4 isoform Iso 1 \Gname=GLOD4 \NcbiTaxId=9606
nxp:NX_Q9NRF8-1	586	4	65617.8	4	12	0.0887	CTP synthase 2 isoform Iso 1 \Gname=CTPS2 \NcbiTaxId=9606
nxp:NX_Q9NRG1-1	225	2	25639	4	17	0.1911	Phosphoribosyltransferase domain-containing protein 1 isoform Iso 1 \Gname=PRTFDC1 \NcbiTaxId=9606
nxp:NX_Q9NVG8-1	400	0	46505.5	4	9	0.0825	TBC1 domain family member 13 isoform Iso 1 \Gname=TBC1D13 \NcbiTaxId=9606
nxp:NX_Q9NVG8-2	275	0	32132.6	4	9	0.12	TBC1 domain family member 13 isoform Iso 2 \Gname=TBC1D13 \NcbiTaxId=9606
nxp:NX_Q9NW15-1	660	0	76261.8	4	9	0.0773	Anoctamin-10 isoform Iso 1 \Gname=ANO10 \NcbiTaxId=9606
nxp:NX_Q9P289-3	354	0	39615.1	4	5	0.1384	Serine/threonine-protein kinase MST4 isoform Iso 3 \Gname=MST4 \NcbiTaxId=9606
nxp:NX_Q9UBF2-1	871	1	97541.6	4	6	0.0677	Coatomer subunit gamma-2 isoform Iso 1 \Gname=COPG2 \NcbiTaxId=9606
nxp:NX_Q9UIB8-4	280	0	31613.1	4	13	0.2107	SLAM family member 5 isoform Iso 4 \Gname=CD84 \NcbiTaxId=9606
nxp:NX_Q9UIB8-5	272	0	30476.4	4	13	0.2169	SLAM family member 5 isoform Iso 5 \Gname=CD84 \NcbiTaxId=9606
nxp:NX_Q9UIB8-6	241	0	26867.4	4	13	0.2448	SLAM family member 5 isoform Iso 6 \Gname=CD84 \NcbiTaxId=9606
nxp:NX_Q9UJW0-1	460	0	52285.6	4	8	0.1087	Dynactin subunit 4 isoform Iso 2 \Gname=DCTN4 \NcbiTaxId=9606
nxp:NX_Q9UJW0-3	467	0	53100	4	8	0.1071	Dynactin subunit 4 isoform Iso 3 \Gname=DCTN4 \NcbiTaxId=9606
nxp:NX_Q9UKK9-1	219	4	24294.2	4	13	0.242	ADP-sugar pyrophosphatase isoform Iso 1 \Gname=NUDT5 \NcbiTaxId=9606
nxp:NX_Q9UKY7-1	258	0	27300.3	4	10	0.3101	Protein CDV3 homolog isoform Iso 1 \Gname=CDV3 \NcbiTaxId=9606
nxp:NX_Q9UKY7-2	213	0	22047.7	4	10	0.3756	Protein CDV3 homolog isoform Iso 2 \Gname=CDV3 \NcbiTaxId=9606
nxp:NX_Q9UN19-1	280	2	32155.2	4	44	0.2179	Dual adapter for phosphotyrosine and 3-phosphotyrosine and 3-phosphoinositide isoform Iso 1 \Gname=DAPP1 \NcbiTaxId=9606
nxp:NX_Q9UN37-1	437	1	48849	4	21	0.0686	Vacuolar protein sorting-associated protein 4A isoform Iso 1 \Gname=VPS4A \NcbiTaxId=9606
nxp:NX_Q9Y262-2	516	0	60956.7	4	10	0.0736	Eukaryotic translation initiation factor 3 subunit L isoform Iso 2 \Gname=EIF3L \NcbiTaxId=9606
nxp:NX_Q9Y265-2	386	0	42082	4	19	0.1399	RuvB-like 1 isoform Iso 2 \Gname=RUVBL1 \NcbiTaxId=9606
nxp:NX_Q9Y2H0-1	989	0	107483.2	4	13	0.0495	Disks large-associated protein 4 isoform Iso 2 \Gname=DLGAP4 \NcbiTaxId=9606
nxp:NX_Q9Y2H0-2	992	0	107927.4	4	13	0.0494	Disks large-associated protein 4 isoform Iso 1 \Gname=DLGAP4 \NcbiTaxId=9606
nxp:NX_Q9Y2H0-3	453	0	49429.6	4	13	0.1082	Disks large-associated protein 4 isoform Iso 3 \Gname=DLGAP4 \NcbiTaxId=9606
nxp:NX_Q9Y2Q3-3	214	0	24151.7	4	23	0.1916	Glutathione S-transferase kappa 1 isoform Iso 3 \Gname=GSTK1 \NcbiTaxId=9606
nxp:NX_Q9Y2X7-1	761	0	84270.8	4	25	0.0683	ARF GTPase-activating protein GIT1 isoform Iso 1 \Gname=GIT1 \NcbiTaxId=9606
nxp:NX_Q9Y2X7-3	770	0	85375.3	4	25	0.0675	ARF GTPase-activating protein GIT1 isoform Iso 3 \Gname=GIT1 \NcbiTaxId=9606
nxp:NX_Q9Y315-1	318	4	35190.5	4	48	0.1918	Putative deoxyribose-phosphate aldolase isoform Iso 1 \Gname=DERA \NcbiTaxId=9606
nxp:NX_Q9Y394-1	339	4	38256.1	4	5	0.2153	Dehydrogenase/reductase SDR family member 7 isoform Iso 2 \Gname=DHRS7 \NcbiTaxId=9606
nxp:NX_Q9Y3B3-1	224	0	25137.6	4	20	0.2098	Transmembrane emp24 domain-containing protein 7 isoform Iso 2 \Gname=TMED7 \NcbiTaxId=9606
nxp:NX_Q9Y4E8-1	981	0	112329.7	4	20	0.0387	Ubiquitin carboxyl-terminal hydrolase 15 isoform Iso 1 \Gname=USP15 \NcbiTaxId=9606
nxp:NX_Q9Y4E8-2	952	0	109209.2	4	20	0.0399	Ubiquitin carboxyl-terminal hydrolase 15 isoform Iso 2 \Gname=USP15 \NcbiTaxId=9606
nxp:NX_Q9Y4E8-3	956	0	109708.5	4	20	0.0397	Ubiquitin carboxyl-terminal hydrolase 15 isoform Iso 3 \Gname=USP15 \NcbiTaxId=9606
nxp:NX_Q9Y5K6-1	639	4	71389.3	4	5	0.0767	CD2-associated protein isoform Iso 1 \Gname=CD2AP \NcbiTaxId=9606
nxp:NX_Q9Y619-1	301	4	32696.7	4	6	0.1362	Mitochondrial ornithine transporter 1 isoform Iso 1 \Gname=SLC25A15 \NcbiTaxId=9606
nxp:NX_Q9Y6D5-1	1785	0	201891.1	4	7	0.023	Brefeldin A-inhibited guanine nucleotide-exchange protein 2 isoform Iso 1 \Gname=ARFGEF2 \NcbiTaxId=9606
nxp:NX_Q9Y6G9-1	523	4	56526	4	9	0.1052	Cytoplasmic dynein 1 light intermediate chain 1 isoform Iso 1 \Gname=DYNC1LI1 \NcbiTaxId=9606
nxp:NX_A0M8Q6-1	106	0	11277.6	3	15	0.3679	Ig lambda-7 chain C region isoform Iso 1 \Gname=IGLC7 \NcbiTaxId=9606
nxp:NX_A2RUS2-1	1198	0	135784	3	5	0.0401	DENN domain-containing protein 3 isoform Iso 1 \Gname=DENND3 \NcbiTaxId=9606
nxp:NX_A2RUS2-2	1146	0	129706.8	3	5	0.0419	DENN domain-containing protein 3 isoform Iso 2 \Gname=DENND3 \NcbiTaxId=9606
nxp:NX_A6NHG4-1	134	0	14168.3	3	4	0.1716	D-dopachrome decarboxylase-like protein isoform Iso 1 \Gname=DDTL \NcbiTaxId=9606
nxp:NX_A7E2Y1-1	1941	0	221233.2	3	4	0.0103	Myosin-7B isoform Iso 2 \Gname=MYH7B \NcbiTaxId=9606
nxp:NX_O00116-1	658	3	72847.7	3	19	0.0805	Alkyldihydroxyacetonephosphate synthase. peroxisomal isoform Iso 1 \Gname=AGPS \NcbiTaxId=9606
nxp:NX_O00154-2	246	0	27005.7	3	32	0.1545	Cytosolic acyl coenzyme A thioester hydrolase isoform Iso 2 \Gname=ACOT7 \NcbiTaxId=9606
nxp:NX_O00154-3	283	0	30939.6	3	32	0.1343	Cytosolic acyl coenzyme A thioester hydrolase isoform Iso 3 \Gname=ACOT7 \NcbiTaxId=9606
nxp:NX_O00214-1	317	0	35767.5	3	6	0.1041	Galectin-8 isoform Iso 1 \Gname=LGALS8 \NcbiTaxId=9606
nxp:NX_O00214-2	359	0	40353.9	3	6	0.0919	Galectin-8 isoform Iso 2 \Gname=LGALS8 \NcbiTaxId=9606
nxp:NX_O00507-1	2555	0	290873.4	3	7	0.0137	Probable ubiquitin carboxyl-terminal hydrolase FAF-Y isoform Short \Gname=USP9Y \NcbiTaxId=9606
nxp:NX_O00534-1	786	0	86416	3	11	0.0573	von Willebrand factor A domain-containing protein 5A isoform Iso 3 \Gname=VWA5A \NcbiTaxId=9606
nxp:NX_O00534-2	426	0	47000.6	3	11	0.1056	von Willebrand factor A domain-containing protein 5A isoform Iso 2 \Gname=VWA5A \NcbiTaxId=9606
nxp:NX_O00534-4	266	0	29198.6	3	11	0.1692	von Willebrand factor A domain-containing protein 5A isoform Iso 4 \Gname=VWA5A \NcbiTaxId=9606
nxp:NX_O14561-1	156	3	17388	3	4	0.1731	Acyl carrier protein. mitochondrial isoform Iso 1 \Gname=NDUFAB1 \NcbiTaxId=9606
nxp:NX_O14579-1	308	0	34442.3	3	33	0.1981	Coatomer subunit epsilon isoform Iso 1 \Gname=COPE \NcbiTaxId=9606
nxp:NX_O14579-2	257	0	28760.6	3	33	0.2374	Coatomer subunit epsilon isoform Iso 2 \Gname=COPE \NcbiTaxId=9606
nxp:NX_O14617-1	1153	0	130057.8	3	24	0.0252	AP-3 complex subunit delta-1 isoform Iso 1 \Gname=AP3D1 \NcbiTaxId=9606
nxp:NX_O14617-2	1112	0	124943.3	3	24	0.0261	AP-3 complex subunit delta-1 isoform Iso 2 \Gname=AP3D1 \NcbiTaxId=9606
nxp:NX_O14617-3	984	0	111149.6	3	24	0.0295	AP-3 complex subunit delta-1 isoform Iso 3 \Gname=AP3D1 \NcbiTaxId=9606
nxp:NX_O14617-4	1021	0	114616.5	3	24	0.0284	AP-3 complex subunit delta-1 isoform Iso 4 \Gname=AP3D1 \NcbiTaxId=9606
nxp:NX_O14617-5	1215	0	136546.7	3	24	0.0239	AP-3 complex subunit delta-1 isoform Iso 5 \Gname=AP3D1 \NcbiTaxId=9606
nxp:NX_O15439-3	859	0	96761	3	6	0.0314	Multidrug resistance-associated protein 4 isoform Iso 3 \Gname=ABCC4 \NcbiTaxId=9606
nxp:NX_O15498-1	198	3	22385.4	3	9	0.197	Synaptobrevin homolog YKT6 isoform Iso 1 \Gname=YKT6 \NcbiTaxId=9606
nxp:NX_O43242-1	534	3	60921.5	3	13	0.1011	26S proteasome non-ATPase regulatory subunit 3 isoform Iso 1 \Gname=PSMD3 \NcbiTaxId=9606
nxp:NX_O43306-1	1168	0	130512.9	3	3	0.03	Adenylate cyclase type 6 isoform Iso 1 \Gname=ADCY6 \NcbiTaxId=9606
nxp:NX_O43306-2	1115	0	124766.2	3	3	0.0314	Adenylate cyclase type 6 isoform Iso 2 \Gname=ADCY6 \NcbiTaxId=9606
nxp:NX_O43390-1	633	0	70881.2	3	6	0.0332	Heterogeneous nuclear ribonucleoprotein R isoform Iso 1 \Gname=HNRNPR \NcbiTaxId=9606
nxp:NX_O43390-2	636	0	71152.4	3	6	0.033	Heterogeneous nuclear ribonucleoprotein R isoform Iso 2 \Gname=HNRNPR \NcbiTaxId=9606
nxp:NX_O43504-1	91	3	9589.7	3	45	0.5495	Ragulator complex protein LAMTOR5 isoform Iso 1 \Gname=LAMTOR5 \NcbiTaxId=9606
nxp:NX_O43852-9	154	0	17610.5	3	9	0.2208	Calumenin isoform Iso 9 \Gname=CALU \NcbiTaxId=9606
nxp:NX_O43865-1	530	0	58895.4	3	35	0.0566	Putative adenosylhomocysteinase 2 isoform Iso 2 \Gname=AHCYL1 \NcbiTaxId=9606
nxp:NX_O60256-2	329	0	36255.9	3	8	0.0821	Phosphoribosyl pyrophosphate synthase-associated protein 2 isoform Iso 2 \Gname=PRPSAP2 \NcbiTaxId=9606
nxp:NX_O60313-1	960	0	111542.8	3	7	0.0365	Dynamin-like 120 kDa protein. mitochondrial isoform Iso 1 \Gname=OPA1 \NcbiTaxId=9606
nxp:NX_O60313-2	997	0	115794	3	7	0.0351	Dynamin-like 120 kDa protein. mitochondrial isoform Iso 2 \Gname=OPA1 \NcbiTaxId=9606
nxp:NX_O60814-1	126	0	13863.6	3	16	0.2857	Histone H2B type 1-K isoform Iso 1 \Gname=HIST1H2BK \NcbiTaxId=9606
nxp:NX_O75131-1	537	3	60074.1	3	46	0.0466	Copine-3 isoform Iso 1 \Gname=CPNE3 \NcbiTaxId=9606
nxp:NX_O75190-2	241	0	26865.1	3	4	0.1618	DnaJ homolog subfamily B member 6 isoform B \Gname=DNAJB6 \NcbiTaxId=9606
nxp:NX_O75223-1	188	2	20976.3	3	14	0.1809	Gamma-glutamylcyclotransferase isoform Iso 1 \Gname=GGCT \NcbiTaxId=9606
nxp:NX_O75298-1	545	0	59209.5	3	69	0.0642	Reticulon-2 isoform RTN2-C \Gname=RTN2 \NcbiTaxId=9606
nxp:NX_O75298-2	472	0	51379.2	3	69	0.0742	Reticulon-2 isoform RTN2-B \Gname=RTN2 \NcbiTaxId=9606
nxp:NX_O75746-1	678	3	74696.8	3	3	0.0531	Calcium-binding mitochondrial carrier protein Aralar1 isoform Iso 1 \Gname=SLC25A12 \NcbiTaxId=9606
[truncated: 1,338 more rows]

## Sheet: (D) All_Ptns_MaxParsimony
Supplemental Table 1d: All proteins confidently identified in platelet samples with maximum parsimony criterion.
Locus	Length	Unique peptide	Mol/Wt	Sequence count	Spectrum count	Coverage	Description
nxp:NX_A0AVT1-1	1052	5	117877	5	18	0.0637	Ubiquitin-like modifier-activating enzyme 6 isoform Iso 2 \Gname=UBA6
nxp:NX_A0FGR8-2	893	8	98822	10	131	0.1321	Extended synaptotagmin-2 isoform Iso 2 \Gname=ESYT2
nxp:NX_A0FGR8-6	942	0	104625	10	31	0.1221	Extended synaptotagmin-2 isoform Iso 6 \Gname=ESYT2
nxp:NX_A1A4Y4-1	181	1	20110.9	1	1	0.0994	Immunity-related GTPase family M protein isoform Iso 1 \Gname=IRGM
nxp:NX_A1L3X0-1	281	2	33315.9	2	4	0.0676	Elongation of very long chain fatty acids protein 7 isoform Iso 1 \Gname=ELOVL7
nxp:NX_A2RUS2-1	1198	0	135784	3	5	0.0401	DENN domain-containing protein 3 isoform Iso 1 \Gname=DENND3
nxp:NX_A5YKK6-1	2376	0	266750	2	2	0.0084	CCR4-NOT transcription complex subunit 1 isoform Iso 1 \Gname=CNOT1
nxp:NX_A6NDU8-1	294	1	33580.6	1	4	0.0476	UPF0600 protein C5orf51 isoform Iso 1 \Gname=C5orf51
nxp:NX_A6NFX1-1	497	1	52911.7	1	6	0.0322	Major facilitator superfamily domain-containing protein 2B isoform Iso 1 \Gname=MFSD2B
nxp:NX_A6NHC0-1	703	1	79076.4	1	2	0.0199	Calpain-8 isoform Iso 1 \Gname=CAPN8
nxp:NX_A6NKZ8-1	372	1	41730.1	15	110	0.2258	Putative tubulin beta chain-like protein ENSP00000290377 isoform Iso 1 \Gname=null
nxp:NX_A8MYA2-1	512	1	54137.1	1	1	0.043	Putative uncharacterized protein CXorf49 isoform Iso 1 \Gname=CXorf49;CXorf49B
nxp:NX_A9UHW6-1	222	1	25388.8	1	2	0.0586	MIF4G domain-containing protein isoform Iso 1 \Gname=MIF4GD
nxp:NX_B5ME19-1	914	0	105389	7	27	0.0766	Eukaryotic translation initiation factor 3 subunit C-like protein isoform Iso 1 \Gname=EIF3CL
nxp:NX_O00116-1	658	3	72847.7	3	19	0.0805	Alkyldihydroxyacetonephosphate synthase, peroxisomal isoform Iso 1 \Gname=AGPS
nxp:NX_O00139-4	744	0	84018.6	19	293	0.211	Kinesin-like protein KIF2A isoform Iso 4 \Gname=KIF2A
nxp:NX_O00151-1	329	77	36031	77	1301	0.8024	PDZ and LIM domain protein 1 isoform Iso 1 \Gname=PDLIM1
nxp:NX_O00154-1	380	0	41751.3	4	36	0.1421	Cytosolic acyl coenzyme A thioester hydrolase isoform Iso 1 \Gname=ACOT7
nxp:NX_O00159-1	1063	0	121588	10	59	0.1082	Unconventional myosin-Ic isoform Iso 1 \Gname=MYO1C
nxp:NX_O00161-1	211	15	23321.5	15	220	0.5071	Synaptosomal-associated protein 23 isoform SNAP-23a \Gname=SNAP23
nxp:NX_O00170-1	330	1	37594.1	1	2	0.0424	AH receptor-interacting protein isoform Iso 1 \Gname=AIP
nxp:NX_O00186-1	592	7	67702.8	7	52	0.1301	Syntaxin-binding protein 3 isoform Iso 1 \Gname=STXBP3
nxp:NX_O00194-1	218	23	24574.2	23	498	0.7339	Ras-related protein Rab-27B isoform Iso 1 \Gname=RAB27B
nxp:NX_O00203-1	1094	12	121226	12	77	0.128	AP-3 complex subunit beta-1 isoform Iso 2 \Gname=AP3B1
nxp:NX_O00214-2	359	0	40353.9	3	6	0.0919	Galectin-8 isoform Iso 2 \Gname=LGALS8
nxp:NX_O00231-2	423	0	47487.1	11	132	0.2506	26S proteasome non-ATPase regulatory subunit 11 isoform Iso 2 \Gname=PSMD11
nxp:NX_O00232-1	456	2	52852.6	2	15	0.0439	26S proteasome non-ATPase regulatory subunit 12 isoform Iso 1 \Gname=PSMD12
nxp:NX_O00233-1	223	0	24648.5	4	20	0.1883	26S proteasome non-ATPase regulatory subunit 9 isoform p27-L \Gname=PSMD9
nxp:NX_O00264-1	195	9	21639.7	9	148	0.3179	Membrane-associated progesterone receptor component 1 isoform Iso 1 \Gname=PGRMC1
nxp:NX_O00299-1	241	30	26887.7	32	623	0.7386	Chloride intracellular channel protein 1 isoform Iso 1 \Gname=CLIC1
nxp:NX_O00391-1	747	0	82507.5	2	11	0.0388	Sulfhydryl oxidase 1 isoform Iso 1 \Gname=QSOX1
nxp:NX_O00410-3	1115	13	125446	13	51	0.1274	Importin-5 isoform Iso 2 \Gname=IPO5
nxp:NX_O00429-3	710	24	79373.9	41	529	0.4282	Dynamin-1-like protein isoform Iso 2 \Gname=DNM1L
nxp:NX_O00429-6	749	0	83328.9	43	602	0.4326	Dynamin-1-like protein isoform Iso 6 \Gname=DNM1L
nxp:NX_O00461-1	696	1	81813.3	1	3	0.0201	Golgi integral membrane protein 4 isoform Iso 1 \Gname=GOLIM4
nxp:NX_O00483-1	81	4	9345.9	4	24	0.4691	NADH dehydrogenase [ubiquinone] 1 alpha subcomplex subunit 4 isoform Iso 1 \Gname=NDUFA4
nxp:NX_O00501-1	218	2	23113.9	2	9	0.1284	Claudin-5 isoform Iso 1 \Gname=CLDN5
nxp:NX_O00505-1	521	2	57756.8	2	4	0.0345	Importin subunit alpha-4 isoform Iso 1 \Gname=KPNA3
nxp:NX_O00534-1	786	0	86416	3	11	0.0573	von Willebrand factor A domain-containing protein 5A isoform Iso 3 \Gname=VWA5A
nxp:NX_O00571-1	662	0	73180	4	37	0.0831	ATP-dependent RNA helicase DDX3X isoform Iso 1 \Gname=DDX3X
nxp:NX_O00584-1	256	1	29443.8	1	2	0.0586	Ribonuclease T2 isoform Iso 1 \Gname=RNASET2
nxp:NX_O00743-3	342	0	38903.5	4	20	0.0994	Serine/threonine-protein phosphatase 6 catalytic subunit isoform Iso 3 \Gname=PPP6C
nxp:NX_O00754-1	1011	0	113654	1	2	0.0158	Lysosomal alpha-mannosidase isoform Iso 1 \Gname=MAN2B1
nxp:NX_O14556-1	408	1	44454.8	6	25	0.0809	Glyceraldehyde-3-phosphate dehydrogenase, testis-specific isoform Iso 1 \Gname=GAPDHS
nxp:NX_O14561-1	156	3	17388	3	4	0.1731	Acyl carrier protein, mitochondrial isoform Iso 1 \Gname=NDUFAB1
nxp:NX_O14579-1	308	0	34442.3	3	33	0.1981	Coatomer subunit epsilon isoform Iso 1 \Gname=COPE
nxp:NX_O14617-5	1215	0	136547	3	24	0.0239	AP-3 complex subunit delta-1 isoform Iso 5 \Gname=AP3D1
nxp:NX_O14618-1	274	6	29004.4	6	34	0.3066	Copper chaperone for superoxide dismutase isoform Iso 1 \Gname=CCS
nxp:NX_O14639-1	778	0	87613.1	5	12	0.0668	Actin-binding LIM protein 1 isoform Iso 1 \Gname=ABLIM1
nxp:NX_O14662-1	325	0	36990.2	1	1	0.0431	Syntaxin-16 isoform B \Gname=STX16
nxp:NX_O14672-1	748	18	84069.7	18	185	0.266	Disintegrin and metalloproteinase domain-containing protein 10 isoform Iso 1 \Gname=ADAM10
nxp:NX_O14737-1	125	1	14258.3	1	5	0.104	Programmed cell death protein 5 isoform Iso 1 \Gname=PDCD5
nxp:NX_O14744-1	637	0	72619.5	1	2	0.0204	Protein arginine N-methyltransferase 5 isoform Iso 1 \Gname=PRMT5
nxp:NX_O14745-1	358	16	38826.6	16	171	0.4637	Na(+)/H(+) exchange regulatory cofactor NHE-RF1 isoform Iso 1 \Gname=SLC9A3R1
nxp:NX_O14773-1	563	4	61191.6	4	49	0.0675	Tripeptidyl-peptidase 1 isoform Iso 2 \Gname=TPP1
nxp:NX_O14818-1	248	8	27851.6	8	91	0.3024	Proteasome subunit alpha type-7 isoform Iso 2 \Gname=PSMA7
nxp:NX_O14828-1	347	2	38244.3	7	13	0.2767	Secretory carrier-associated membrane protein 3 isoform Iso 1 \Gname=SCAMP3
nxp:NX_O14949-1	82	1	9882.1	1	2	0.1585	Cytochrome b-c1 complex subunit 8 isoform Iso 1 \Gname=UQCRQ
nxp:NX_O14950-1	172	0	19748.5	25	339	0.6047	Myosin regulatory light chain 12B isoform Iso 1 \Gname=MYL12B
nxp:NX_O14964-1	777	0	86119.5	4	46	0.0592	Hepatocyte growth factor-regulated tyrosine kinase substrate isoform Iso 1 \Gname=HGS
nxp:NX_O14974-1	1030	0	115193	12	104	0.1272	Protein phosphatase 1 regulatory subunit 12A isoform Iso 5 \Gname=PPP1R12A
nxp:NX_O14980-1	1071	9	123288	9	21	0.0999	Exportin-1 isoform Iso 1 \Gname=XPO1
nxp:NX_O14983-1	1001	0	110164	10	20	0.0989	Sarcoplasmic/endoplasmic reticulum calcium ATPase 1 isoform SERCA1B \Gname=ATP2A1
nxp:NX_O15031-1	1838	2	204979	2	2	0.0114	Plexin-B2 isoform Iso 1 \Gname=PLXNB2
nxp:NX_O15067-1	1338	2	144625	2	4	0.0164	Phosphoribosylformylglycinamidine synthase isoform Iso 1 \Gname=PFAS
nxp:NX_O15116-1	133	2	15152.1	2	11	0.1729	U6 snRNA-associated Sm-like protein LSm1 isoform Iso 1 \Gname=LSM1
nxp:NX_O15117-3	839	33	91577.3	33	444	0.3754	FYN-binding protein isoform FYB-130 \Gname=FYB
nxp:NX_O15127-1	329	5	36607.3	5	116	0.1915	Secretory carrier-associated membrane protein 2 isoform Iso 1 \Gname=SCAMP2
nxp:NX_O15143-1	372	29	40905.4	30	581	0.5215	Actin-related protein 2/3 complex subunit 1B isoform Iso 1 \Gname=ARPC1B
nxp:NX_O15144-1	300	35	34293.5	35	325	0.6667	Actin-related protein 2/3 complex subunit 2 isoform Iso 1 \Gname=ARPC2
nxp:NX_O15145-1	178	9	20515.4	9	184	0.3034	Actin-related protein 2/3 complex subunit 3 isoform Iso 1 \Gname=ARPC3
nxp:NX_O15173-1	223	4	23785.7	5	98	0.2242	Membrane-associated progesterone receptor component 2 isoform Iso 1 \Gname=PGRMC2
nxp:NX_O15194-1	276	0	31090.8	2	4	0.0652	CTD small phosphatase-like protein isoform Iso 1 \Gname=CTDSPL
nxp:NX_O15212-1	129	1	14555.8	1	1	0.093	Prefoldin subunit 6 isoform Iso 1 \Gname=PFDN6
nxp:NX_O15231-3	690	0	73549.2	10	80	0.2101	Zinc finger protein 185 isoform Iso 3 \Gname=ZNF185
nxp:NX_O15243-1	131	1	14226.4	1	5	0.0992	Leptin receptor gene-related protein isoform Iso 1 \Gname=LEPROT
nxp:NX_O15260-1	269	0	30355.8	2	8	0.0781	Surfeit locus protein 4 isoform Iso 1 \Gname=SURF4
nxp:NX_O15264-1	365	1	42044.6	1	1	0.0466	Mitogen-activated protein kinase 13 isoform Iso 1 \Gname=MAPK13
nxp:NX_O15269-1	473	0	52692.5	1	6	0.0359	Serine palmitoyltransferase 1 isoform Iso 1 \Gname=SPTLC1
nxp:NX_O15327-1	924	10	104654	10	46	0.1288	Type II inositol 3,4-bisphosphate 4-phosphatase isoform Iso 1 \Gname=INPP4B
nxp:NX_O15371-1	548	1	63914.4	1	1	0.0255	Eukaryotic translation initiation factor 3 subunit D isoform Iso 1 \Gname=EIF3D
nxp:NX_O15400-1	261	0	29779.3	7	155	0.3295	Syntaxin-7 isoform Iso 1 \Gname=STX7
nxp:NX_O15427-1	465	4	49418.9	4	32	0.0882	Monocarboxylate transporter 4 isoform Iso 1 \Gname=SLC16A3
nxp:NX_O15439-1	1325	0	149414	5	30	0.0355	Multidrug resistance-associated protein 4 isoform Iso 1 \Gname=ABCC4
nxp:NX_O15498-1	198	3	22385.4	3	9	0.197	Synaptobrevin homolog YKT6 isoform Iso 1 \Gname=YKT6
nxp:NX_O15511-1	151	8	16292.3	8	110	0.4503	Actin-related protein 2/3 complex subunit 5 isoform Iso 1 \Gname=ARPC5
nxp:NX_O15533-3	504	0	53890.8	4	23	0.1369	Tapasin isoform Iso 3 \Gname=TAPBP
nxp:NX_O43149-1	2961	7	330846	7	21	0.0314	Zinc finger ZZ-type and EF-hand domain-containing protein 1 isoform Iso 1 \Gname=ZZEF1
nxp:NX_O43150-1	1006	10	111563	15	91	0.1909	Arf-GAP with SH3 domain, ANK repeat and PH domain-containing protein 2 isoform Iso 1 \Gname=ASAP2
nxp:NX_O43169-1	146	4	16304	4	15	0.3562	Cytochrome b5 type B isoform Iso 1 \Gname=CYB5B
nxp:NX_O43182-1	974	15	105864	17	122	0.1817	Rho GTPase-activating protein 6 isoform Iso 4 \Gname=ARHGAP6
nxp:NX_O43242-1	534	3	60921.5	3	13	0.1011	26S proteasome non-ATPase regulatory subunit 3 isoform Iso 1 \Gname=PSMD3
nxp:NX_O43294-1	461	18	49763.8	18	304	0.5249	Transforming growth factor beta-1-induced transcript 1 protein isoform Iso 2 \Gname=TGFB1I1
nxp:NX_O43306-1	1168	0	130513	3	3	0.03	Adenylate cyclase type 6 isoform Iso 1 \Gname=ADCY6
nxp:NX_O43312-1	755	0	82181.9	5	34	0.0874	Metastasis suppressor protein 1 isoform Iso 1 \Gname=MTSS1
nxp:NX_O43396-1	289	6	32212.7	6	24	0.2491	Thioredoxin-like protein 1 isoform Iso 1 \Gname=TXNL1
nxp:NX_O43399-7	229	0	24820.5	8	111	0.3362	Tumor protein D54 isoform Iso 7 \Gname=TPD52L2
nxp:NX_O43488-1	359	13	39545.7	13	151	0.3844	Aflatoxin B1 aldehyde reductase member 2 isoform Iso 1 \Gname=AKR7A2
nxp:NX_O43493-1	480	0	51064.4	4	12	0.1229	Trans-Golgi network integral membrane protein 2 isoform TGN51 \Gname=TGOLN2
nxp:NX_O43504-1	91	3	9589.7	3	45	0.5495	Ragulator complex protein LAMTOR5 isoform Iso 1 \Gname=LAMTOR5
nxp:NX_O43516-3	510	0	51930.7	7	12	0.1863	WAS/WASL-interacting protein family member 1 isoform Iso 1 \Gname=WIPF1
nxp:NX_O43561-1	262	0	27894.4	5	63	0.271	Linker for activation of T-cells family member 1 isoform Long \Gname=LAT
nxp:NX_O43615-1	452	4	51305.4	4	11	0.0951	Mitochondrial import inner membrane translocase subunit TIM44 isoform Iso 1 \Gname=TIMM44
nxp:NX_O43639-1	380	12	42870.5	12	152	0.3526	Cytoplasmic protein NCK2 isoform Iso 1 \Gname=NCK2
nxp:NX_O43665-3	181	5	21178.6	5	32	0.2652	Regulator of G-protein signaling 10 isoform Iso 3 \Gname=RGS10
nxp:NX_O43681-1	348	7	38749.4	7	95	0.1983	ATPase ASNA1 isoform Iso 1 \Gname=ASNA1
nxp:NX_O43707-1	911	40	104770	100	2365	0.6345	Alpha-actinin-4 isoform Iso 1 \Gname=ACTN4
nxp:NX_O43747-2	825	0	91646.3	7	58	0.0812	AP-1 complex subunit gamma-1 isoform Iso 2 \Gname=AP1G1
nxp:NX_O43765-1	313	1	34023.7	1	1	0.0479	Small glutamine-rich tetratricopeptide repeat-containing protein alpha isoform Iso 1 \Gname=SGTA
nxp:NX_O43768-4	140	0	15506	4	29	0.3143	Alpha-endosulfine isoform Iso 4 \Gname=ENSA
nxp:NX_O43776-1	548	1	62884.5	1	2	0.0328	Asparagine--tRNA ligase, cytoplasmic isoform Iso 1 \Gname=NARS
nxp:NX_O43815-1	780	0	86060.8	8	24	0.1205	Striatin isoform Iso 1 \Gname=STRN
nxp:NX_O43852-3	323	9	38009	9	100	0.2632	Calumenin isoform Iso 15 \Gname=CALU
nxp:NX_O60229-1	2985	0	339942	12	77	0.0462	Kalirin isoform Iso 1 \Gname=KALRN
nxp:NX_O60234-1	142	4	16772.4	4	27	0.162	Glia maturation factor gamma isoform Iso 1 \Gname=GMFG
nxp:NX_O60256-1	369	0	40881.3	4	14	0.0976	Phosphoribosyl pyrophosphate synthase-associated protein 2 isoform Iso 1 \Gname=PRPSAP2
nxp:NX_O60268-1	411	9	46591.3	9	92	0.2019	Uncharacterized protein KIAA0513 isoform Iso 2 \Gname=KIAA0513
nxp:NX_O60271-1	1321	0	146097	1	3	0.0083	C-Jun-amino-terminal kinase-interacting protein 4 isoform Iso 1 \Gname=SPAG9
nxp:NX_O60313-2	997	0	115794	3	7	0.0351	Dynamin-like 120 kDa protein, mitochondrial isoform Iso 2 \Gname=OPA1
nxp:NX_O60488-1	711	7	79118.7	8	20	0.1294	Long-chain-fatty-acid--CoA ligase 4 isoform Short \Gname=ACSL4
nxp:NX_O60493-1	162	4	18732.7	7	37	0.321	Sorting nexin-3 isoform Iso 1 \Gname=SNX3
nxp:NX_O60496-1	412	6	45332.7	6	76	0.2451	Docking protein 2 isoform Iso 1 \Gname=DOK2
nxp:NX_O60506-1	623	0	69541.6	11	44	0.1814	Heterogeneous nuclear ribonucleoprotein Q isoform Iso 1 \Gname=SYNCRIP
nxp:NX_O60610-1	1272	0	141240	27	308	0.2178	Protein diaphanous homolog 1 isoform Iso 1 \Gname=DIAPH1
nxp:NX_O60636-1	221	1	24113.3	1	1	0.0543	Tetraspanin-2 isoform Iso 1 \Gname=TSPAN2
nxp:NX_O60664-1	434	0	47027.9	10	55	0.3134	Perilipin-3 isoform Iso 1 \Gname=PLIN3
nxp:NX_O60704-1	377	2	41866.8	2	4	0.061	Protein-tyrosine sulfotransferase 2 isoform Iso 1 \Gname=TPST2
nxp:NX_O60749-1	519	8	58416.6	8	91	0.1464	Sorting nexin-2 isoform Iso 1 \Gname=SNX2
nxp:NX_O60763-2	973	0	109109	14	94	0.1809	General vesicular transport factor p115 isoform Iso 2 \Gname=USO1
nxp:NX_O60831-1	178	1	19227.5	1	2	0.0618	PRA1 family protein 2 isoform Iso 1 \Gname=PRAF2
nxp:NX_O60841-1	1220	4	138724	4	15	0.0369	Eukaryotic translation initiation factor 5B isoform Iso 1 \Gname=EIF5B
nxp:NX_O60884-1	412	6	45698.6	6	31	0.1481	DnaJ homolog subfamily A member 2 isoform Iso 1 \Gname=DNAJA2
nxp:NX_O60888-2	198	0	20893.8	1	38	0.0707	Protein CutA isoform A \Gname=CUTA
nxp:NX_O75083-1	606	54	66133.9	54	1345	0.6601	WD repeat-containing protein 1 isoform Iso 1 \Gname=WDR1
nxp:NX_O75116-1	1388	43	160781	44	514	0.3048	Rho-associated protein kinase 2 isoform Iso 1 \Gname=ROCK2
nxp:NX_O75131-1	537	3	60074.1	3	46	0.0466	Copine-3 isoform Iso 1 \Gname=CPNE3
nxp:NX_O75165-1	2243	2	254234	2	4	0.0098	DnaJ homolog subfamily C member 13 isoform Iso 1 \Gname=DNAJC13
nxp:NX_O75190-1	326	0	36046.9	4	6	0.1718	DnaJ homolog subfamily B member 6 isoform A \Gname=DNAJB6
nxp:NX_O75223-1	188	2	20976.3	3	14	0.1809	Gamma-glutamylcyclotransferase isoform Iso 1 \Gname=GGCT
nxp:NX_O75298-1	545	0	59209.5	3	69	0.0642	Reticulon-2 isoform RTN2-C \Gname=RTN2
nxp:NX_O75306-1	463	0	52493.7	2	6	0.0497	NADH dehydrogenase [ubiquinone] iron-sulfur protein 2, mitochondrial isoform Iso 1 \Gname=NDUFS2
nxp:NX_O75323-1	286	2	33703.2	2	2	0.0839	Protein NipSnap homolog 2 isoform Iso 1 \Gname=GBAS
nxp:NX_O75340-1	191	0	21836.8	2	9	0.1257	Programmed cell death protein 6 isoform Iso 1 \Gname=PDCD6
nxp:NX_O75347-1	108	5	12828.7	5	41	0.3704	Tubulin-specific chaperone A isoform Iso 1 \Gname=TBCA
nxp:NX_O75351-1	444	10	49253.5	10	68	0.2455	Vacuolar protein sorting-associated protein 4B isoform Iso 1 \Gname=VPS4B
nxp:NX_O75352-1	247	2	26602.5	2	5	0.0972	Mannose-P-dolichol utilization defect 1 protein isoform Iso 1 \Gname=MPDU1
nxp:NX_O75368-1	114	12	12748.4	12	259	0.8509	SH3 domain-binding glutamic acid-rich-like protein isoform Iso 1 \Gname=SH3BGRL
nxp:NX_O75369-8	2633	0	281441	28	202	0.0577	Filamin-B isoform Iso 8 \Gname=FLNB
nxp:NX_O75380-1	124	2	13684.8	2	4	0.2177	NADH dehydrogenase [ubiquinone] iron-sulfur protein 6, mitochondrial isoform Iso 1 \Gname=NDUFS6
nxp:NX_O75390-1	466	14	51661.5	14	160	0.2489	Citrate synthase, mitochondrial isoform Iso 1 \Gname=CS
nxp:NX_O75396-1	215	6	24559.5	6	89	0.3395	Vesicle-trafficking protein SEC22b isoform Iso 1 \Gname=SEC22B
nxp:NX_O75410-2	817	0	89145	2	3	0.022	Transforming acidic coiled-coil-containing protein 1 isoform Iso 2 \Gname=TACC1
nxp:NX_O75477-1	346	0	38883.3	1	1	0.0347	Erlin-1 isoform Iso 1 \Gname=ERLIN1
nxp:NX_O75558-1	287	13	33156.8	13	202	0.3902	Syntaxin-11 isoform Iso 1 \Gname=STX11
nxp:NX_O75563-1	359	16	41172.9	16	208	0.3231	Src kinase-associated phosphoprotein 2 isoform Iso 1 \Gname=SKAP2
nxp:NX_O75608-1	230	0	24635.5	5	47	0.2391	Acyl-protein thioesterase 1 isoform Iso 1 \Gname=LYPLA1
nxp:NX_O75695-1	350	5	39597.4	5	35	0.1171	Protein XRP2 isoform Iso 1 \Gname=RP2
nxp:NX_O75746-1	678	3	74696.8	3	3	0.0531	Calcium-binding mitochondrial carrier protein Aralar1 isoform Iso 1 \Gname=SLC25A12
nxp:NX_O75791-1	330	10	37867.7	10	130	0.3545	GRB2-related adapter protein 2 isoform Iso 1 \Gname=GRAP2
nxp:NX_O75822-1	258	1	29026.5	1	1	0.0465	Eukaryotic translation initiation factor 3 subunit J isoform Iso 1 \Gname=EIF3J
nxp:NX_O75832-1	226	0	24394.4	1	2	0.0708	26S proteasome non-ATPase regulatory subunit 10 isoform Iso 1 \Gname=PSMD10
nxp:NX_O75844-1	475	1	54759.5	1	5	0.0274	CAAX prenyl protease 1 homolog isoform Iso 1 \Gname=ZMPSTE24
nxp:NX_O75874-1	414	11	46611.5	12	203	0.2536	Isocitrate dehydrogenase [NADP] cytoplasmic isoform Iso 1 \Gname=IDH1
nxp:NX_O75915-1	188	4	21582.4	4	33	0.1383	PRA1 family protein 3 isoform Iso 1 \Gname=ARL6IP5
nxp:NX_O75935-1	186	0	21088.2	2	6	0.1022	Dynactin subunit 3 isoform Iso 1 \Gname=DCTN3
nxp:NX_O75947-1	161	14	18461.5	14	117	0.6335	ATP synthase subunit d, mitochondrial isoform Iso 1 \Gname=ATP5H
nxp:NX_O75954-1	239	1	26742.5	1	16	0.0628	Tetraspanin-9 isoform Iso 1 \Gname=TSPAN9
nxp:NX_O75955-1	427	12	47307.6	12	95	0.3091	Flotillin-1 isoform Iso 1 \Gname=FLOT1
nxp:NX_O75964-1	103	5	11403.2	5	63	0.4466	ATP synthase subunit g, mitochondrial isoform Iso 1 \Gname=ATP5L
nxp:NX_O76003-1	335	8	37390.2	8	109	0.2866	Glutaredoxin-3 isoform Iso 1 \Gname=GLRX3
nxp:NX_O76074-1	875	0	99903.1	33	454	0.3349	cGMP-specific 3',5'-cyclic phosphodiesterase isoform PDE5A1 \Gname=PDE5A
nxp:NX_O94804-1	968	3	112047	3	9	0.0475	Serine/threonine-protein kinase 10 isoform Iso 1 \Gname=STK10
nxp:NX_O94826-1	608	3	67394	3	3	0.0477	Mitochondrial import receptor subunit TOM70 isoform Iso 1 \Gname=TOMM70A
nxp:NX_O94855-2	1033	0	112989	2	2	0.0281	Protein transport protein Sec24D isoform Iso 2 \Gname=SEC24D
nxp:NX_O94886-1	807	9	92048	9	82	0.0979	Transmembrane protein 63A isoform Iso 1 \Gname=TMEM63A
nxp:NX_O94903-1	275	1	30306.6	1	8	0.0473	Proline synthase co-transcribed bacterial homolog protein isoform Iso 1 \Gname=PROSC
nxp:NX_O94915-1	3013	1	339365	1	8	0.0043	Protein furry homolog-like isoform Iso 1 \Gname=FRYL
nxp:NX_O94919-1	500	10	54963.3	10	170	0.172	Endonuclease domain-containing 1 protein isoform Iso 1 \Gname=ENDOD1
nxp:NX_O94925-1	669	0	73395.9	3	4	0.0628	Glutaminase kidney isoform, mitochondrial isoform Iso 1 \Gname=GLS
nxp:NX_O94929-1	683	0	77733.6	2	4	0.0381	Actin-binding LIM protein 3 isoform Iso 1 \Gname=ABLIM3
nxp:NX_O94979-8	1233	0	134397	6	31	0.0608	Protein transport protein Sec31A isoform Iso 8 \Gname=SEC31A
nxp:NX_O95140-1	757	2	86328.8	3	8	0.041	Mitofusin-2 isoform Iso 1 \Gname=MFN2
nxp:NX_O95182-1	113	2	12525.6	2	9	0.1593	NADH dehydrogenase [ubiquinone] 1 alpha subcomplex subunit 7 isoform Iso 1 \Gname=NDUFA7
nxp:NX_O95197-3	236	4	25574.6	6	90	0.2669	Reticulon-3 isoform Iso 3 \Gname=RTN3
nxp:NX_O95202-1	739	1	83283.9	1	1	0.0162	LETM1 and EF-hand domain-containing protein 1, mitochondrial isoform Iso 1 \Gname=LETM1
nxp:NX_O95260-2	518	3	58976	3	13	0.0869	Arginyl-tRNA--protein transferase 1 isoform ATE1-2 \Gname=ATE1
nxp:NX_O95292-1	243	3	27193.1	4	131	0.2263	Vesicle-associated membrane protein-associated protein B/C isoform Iso 1 \Gname=VAPB
nxp:NX_O95319-3	521	0	55701	3	15	0.0749	CUGBP Elav-like family member 2 isoform Iso 3 \Gname=CELF2
nxp:NX_O95336-1	258	8	27511.5	8	75	0.4302	6-phosphogluconolactonase isoform Iso 1 \Gname=PGLS
nxp:NX_O95373-1	1038	6	119422	6	50	0.0684	Importin-7 isoform Iso 1 \Gname=IPO7
nxp:NX_O95433-1	338	2	38232.2	2	8	0.0917	Activator of 90 kDa heat shock protein ATPase homolog 1 isoform Iso 1 \Gname=AHSA1
nxp:NX_O95571-1	254	2	27837.1	2	6	0.0906	Persulfide dioxygenase ETHE1, mitochondrial isoform Iso 1 \Gname=ETHE1
nxp:NX_O95573-1	720	1	80350.3	3	5	0.0542	Long-chain-fatty-acid--CoA ligase 3 isoform Iso 1 \Gname=ACSL3
nxp:NX_O95622-1	1261	0	138800	3	3	0.0278	Adenylate cyclase type 5 isoform Iso 1 \Gname=ADCY5
nxp:NX_O95674-1	445	3	51366	3	63	0.0315	Phosphatidate cytidylyltransferase 2 isoform Iso 1 \Gname=CDS2
nxp:NX_O95721-1	258	6	28934.6	6	46	0.2752	Synaptosomal-associated protein 29 isoform Iso 1 \Gname=SNAP29
nxp:NX_O95747-1	527	4	57968	4	7	0.0797	Serine/threonine-protein kinase OSR1 isoform Iso 1 \Gname=OXSR1
nxp:NX_O95782-1	977	0	107460	16	194	0.1781	AP-2 complex subunit alpha-1 isoform A \Gname=AP2A1
nxp:NX_O95810-1	425	38	47126.6	39	744	0.4894	Serum deprivation-response protein isoform Iso 1 \Gname=SDPR
nxp:NX_O95831-1	613	0	66840.9	6	42	0.1093	Apoptosis-inducing factor 1, mitochondrial isoform Iso 1 \Gname=AIFM1
nxp:NX_O95834-3	850	0	91994	7	43	0.0929	Echinoderm microtubule-associated protein-like 2 isoform Iso 3 \Gname=EML2
nxp:NX_O95837-1	355	1	41526.2	3	27	0.0901	Guanine nucleotide-binding protein subunit alpha-14 isoform Iso 1 \Gname=GNA14
nxp:NX_O95858-1	294	1	33124.8	1	2	0.0782	Tetraspanin-15 isoform Iso 1 \Gname=TSPAN15
nxp:NX_O95861-2	325	0	35703.3	4	12	0.1169	3'(2'),5'-bisphosphate nucleotidase 1 isoform Iso 2 \Gname=BPNT1
nxp:NX_O95865-1	285	5	29607.4	5	30	0.2632	N(G),N(G)-dimethylarginine dimethylaminohydrolase 2 isoform Iso 1 \Gname=DDAH2
nxp:NX_O95866-1	241	1	26129	10	52	0.4025	Protein G6b isoform B \Gname=G6B
nxp:NX_O95866-2	237	16	24969.1	18	365	0.5105	Protein G6b isoform A \Gname=G6B
nxp:NX_O95870-1	558	17	63185.1	19	141	0.3011	Abhydrolase domain-containing protein 16A isoform Iso 1 \Gname=ABHD16A
nxp:NX_O95989-1	172	1	19440.7	1	1	0.0581	Diphosphoinositol polyphosphate phosphohydrolase 1 isoform Iso 1 \Gname=NUDT3
nxp:NX_O96011-1	259	0	28395.2	3	6	0.1274	Peroxisomal membrane protein 11B isoform Iso 1 \Gname=PEX11B
nxp:NX_P00338-3	361	19	39793.9	24	653	0.4155	L-lactate dehydrogenase A chain isoform Iso 1 \Gname=LDHA
nxp:NX_P00352-1	501	4	54808.9	4	11	0.1078	Retinal dehydrogenase 1 isoform Iso 1 \Gname=ALDH1A1
nxp:NX_P00367-1	558	10	61341.2	10	114	0.2133	Glutamate dehydrogenase 1, mitochondrial isoform Iso 1 \Gname=GLUD1
nxp:NX_P00387-3	334	0	38183.6	24	308	0.5269	NADH-cytochrome b5 reductase 3 isoform Iso 3 \Gname=CYB5R3
nxp:NX_P00390-1	522	0	56202.9	9	81	0.2605	Glutathione reductase, mitochondrial isoform Cytoplasmic \Gname=GSR
nxp:NX_P00403-1	227	4	25530.2	4	23	0.1189	Cytochrome c oxidase subunit 2 isoform Iso 1 \Gname=MT-CO2
nxp:NX_P00441-1	154	22	15907.9	22	225	0.7597	Superoxide dismutase [Cu-Zn] isoform Iso 1 \Gname=SOD1
nxp:NX_P00488-1	732	83	83196.6	83	2014	0.5861	Coagulation factor XIII A chain isoform Iso 1 \Gname=F13A1
nxp:NX_P00491-1	289	24	32079.1	24	501	0.5606	Purine nucleoside phosphorylase isoform Iso 1 \Gname=PNP
nxp:NX_P00492-1	218	9	24545.6	10	79	0.4083	Hypoxanthine-guanine phosphoribosyltransferase isoform Iso 1 \Gname=HPRT1
nxp:NX_P00505-1	430	9	47469.3	9	90	0.2093	Aspartate aminotransferase, mitochondrial isoform Iso 1 \Gname=GOT2
nxp:NX_P00558-1	417	44	44568.1	44	867	0.6403	Phosphoglycerate kinase 1 isoform Iso 1 \Gname=PGK1
nxp:NX_P00568-1	194	10	21603.3	10	147	0.4948	Adenylate kinase isoenzyme 1 isoform Iso 1 \Gname=AK1
nxp:NX_P00734-1	622	6	69974.1	6	22	0.1399	Prothrombin isoform Iso 1 \Gname=F2
nxp:NX_P00738-1	406	9	45158.6	9	54	0.2167	Haptoglobin isoform Iso 1 \Gname=HP
nxp:NX_P00747-1	810	17	90492.1	17	174	0.2951	Plasminogen isoform Iso 1 \Gname=PLG
nxp:NX_P00751-1	764	2	85460.5	2	6	0.0288	Complement factor B isoform Iso 1 \Gname=CFB
nxp:NX_P00846-1	226	1	24782.8	1	20	0.0442	ATP synthase subunit a isoform Iso 1 \Gname=MT-ATP6
nxp:NX_P00915-1	261	11	28834.4	11	59	0.4674	Carbonic anhydrase 1 isoform Iso 1 \Gname=CA1
nxp:NX_P00918-1	260	13	29209.9	13	280	0.4577	Carbonic anhydrase 2 isoform Iso 1 \Gname=CA2
nxp:NX_P01009-1	418	13	46689	15	130	0.3254	Alpha-1-antitrypsin isoform Iso 1 \Gname=SERPINA1
nxp:NX_P01011-1	423	1	47602.5	1	2	0.026	Alpha-1-antichymotrypsin isoform Iso 1 \Gname=SERPINA3
nxp:NX_P01024-1	1663	29	187012	29	187	0.2032	Complement C3 isoform Iso 1 \Gname=C3
nxp:NX_P01033-1	207	11	23137.5	11	141	0.5942	Metalloproteinase inhibitor 1 isoform Iso 1 \Gname=TIMP1
nxp:NX_P01042-1	644	0	71894.1	1	1	0.028	Kininogen-1 isoform HMW \Gname=KNG1
nxp:NX_P01111-1	189	3	21197.5	7	12	0.3862	GTPase NRas isoform Iso 1 \Gname=NRAS
nxp:NX_P01116-1	189	0	21624	8	44	0.3862	GTPase KRas isoform 2A \Gname=KRAS
nxp:NX_P01127-1	241	0	27248.1	2	8	0.083	Platelet-derived growth factor subunit B isoform Iso 1 \Gname=PDGFB
nxp:NX_P01133-1	1207	0	133888	4	8	0.0423	Pro-epidermal growth factor isoform Iso 1 \Gname=EGF
nxp:NX_P01137-1	390	18	44294.8	18	267	0.4026	Transforming growth factor beta-1 isoform Iso 1 \Gname=TGFB1
nxp:NX_P01834-1	106	4	11583.7	4	81	0.4811	Ig kappa chain C region isoform Iso 1 \Gname=IGKC
nxp:NX_P01857-1	330	13	36065.2	18	295	0.4879	Ig gamma-1 chain C region isoform Iso 1 \Gname=IGHG1
nxp:NX_P01859-1	326	2	35859.7	7	89	0.273	Ig gamma-2 chain C region isoform Iso 1 \Gname=IGHG2
nxp:NX_P01860-1	377	3	41242.4	13	129	0.3369	Ig gamma-3 chain C region isoform Iso 1 \Gname=IGHG3
nxp:NX_P01861-1	327	1	35899.9	5	18	0.2049	Ig gamma-4 chain C region isoform Iso 1 \Gname=IGHG4
nxp:NX_P01871-2	473	0	51739.9	1	1	0.0338	Ig mu chain C region isoform Iso 2 \Gname=IGHM
nxp:NX_P01876-1	353	7	37612.6	7	42	0.2493	Ig alpha-1 chain C region isoform Iso 1 \Gname=IGHA1
nxp:NX_P01891-1	365	4	40865.1	15	44	0.4301	HLA class I histocompatibility antigen, A-68 alpha chain isoform Iso 1 \Gname=HLA-A
nxp:NX_P02042-1	147	6	16027.3	35	665	0.8163	Hemoglobin subunit delta isoform Iso 1 \Gname=HBD
nxp:NX_P02533-1	472	1	51511.4	5	51	0.0847	Keratin, type I cytoskeletal 14 isoform Iso 1 \Gname=KRT14
nxp:NX_P02545-1	664	0	74076.7	1	1	0.0151	Prelamin-A/C isoform A \Gname=LMNA
nxp:NX_P02647-1	267	11	30740.9	11	156	0.4682	Apolipoprotein A-I isoform Iso 1 \Gname=APOA1
nxp:NX_P02649-1	317	7	36113.7	7	48	0.2587	Apolipoprotein E isoform Iso 1 \Gname=APOE
nxp:NX_P02652-1	100	1	11149.9	1	1	0.11	Apolipoprotein A-II isoform Iso 1 \Gname=APOA2
nxp:NX_P02671-1	866	1	94896.4	122	2375	0.5693	Fibrinogen alpha chain isoform Iso 1 \Gname=FGA
nxp:NX_P02675-1	491	104	55874.3	104	1992	0.7108	Fibrinogen beta chain isoform Iso 1 \Gname=FGB
nxp:NX_P02679-1	453	26	51460.9	106	2401	0.7196	Fibrinogen gamma chain isoform Gamma-B \Gname=FGG
nxp:NX_P02730-1	911	6	101709	6	54	0.0955	Band 3 anion transport protein isoform Iso 1 \Gname=SLC4A1
nxp:NX_P02749-1	345	4	38254.6	4	26	0.1507	Beta-2-glycoprotein 1 isoform Iso 1 \Gname=APOH
nxp:NX_P02751-15	2477	0	272132	38	368	0.2019	Fibronectin isoform Iso 15 \Gname=FN1
nxp:NX_P02765-1	367	5	39281.7	5	21	0.1362	Alpha-2-HS-glycoprotein isoform Iso 1 \Gname=AHSG
nxp:NX_P02768-1	609	108	69303.5	111	2381	0.803	Serum albumin isoform Iso 1 \Gname=ALB
nxp:NX_P02774-3	493	4	55069.1	4	21	0.0974	Vitamin D-binding protein isoform Iso 2 \Gname=GC
nxp:NX_P02775-1	128	29	13867.4	29	1166	0.4219	Platelet basic protein isoform Iso 1 \Gname=PPBP
nxp:NX_P02776-1	101	19	10819.9	19	875	0.5644	Platelet factor 4 isoform Iso 1 \Gname=PF4
nxp:NX_P02786-1	760	3	84799.9	3	3	0.0474	Transferrin receptor protein 1 isoform Iso 1 \Gname=TFRC
nxp:NX_P02787-1	698	17	76995.6	17	183	0.288	Serotransferrin isoform Iso 1 \Gname=TF
nxp:NX_P02790-1	462	3	51625.3	3	11	0.0931	Hemopexin isoform Iso 1 \Gname=HPX
nxp:NX_P02810-1	166	1	16988.3	1	1	0.0843	Salivary acidic proline-rich phosphoprotein 1/2 isoform Iso 1 \Gname=PRH1;PRH2
nxp:NX_P03989-1	362	1	40385	10	45	0.3149	HLA class I histocompatibility antigen, B-27 alpha chain isoform Iso 1 \Gname=HLA-B
nxp:NX_P04004-1	478	3	54253.2	3	33	0.0711	Vitronectin isoform Iso 1 \Gname=VTN
nxp:NX_P04040-1	527	39	59700.7	39	673	0.575	Catalase isoform Iso 1 \Gname=CAT
nxp:NX_P04075-2	418	65	45214.1	65	1322	0.7536	Fructose-bisphosphate aldolase A isoform Iso 1 \Gname=ALDOA
nxp:NX_P04080-1	98	2	11114.6	2	24	0.3367	Cystatin-B isoform Iso 1 \Gname=CSTB
nxp:NX_P04083-1	346	1	38672	1	13	0.0694	Annexin A1 isoform Iso 1 \Gname=ANXA1
nxp:NX_P04114-1	4563	17	515265	17	46	0.0436	Apolipoprotein B-100 isoform Iso 1 \Gname=APOB
nxp:NX_P04156-1	253	1	27625.2	1	7	0.0474	Major prion protein isoform Iso 2 \Gname=PRNP
nxp:NX_P04179-1	222	12	24688.5	12	270	0.6216	Superoxide dismutase [Mn], mitochondrial isoform Iso 1 \Gname=SOD2
nxp:NX_P04196-1	525	2	59522.9	2	5	0.0514	Histidine-rich glycoprotein isoform Iso 1 \Gname=HRG
nxp:NX_P04217-1	495	4	54201.5	4	7	0.1172	Alpha-1B-glycoprotein isoform Iso 2 \Gname=A1BG
nxp:NX_P04264-1	644	39	65981	42	634	0.5652	Keratin, type II cytoskeletal 1 isoform Iso 1 \Gname=KRT1
nxp:NX_P04275-1	2813	91	309040	91	1384	0.3622	von Willebrand factor isoform Iso 1 \Gname=VWF
nxp:NX_P04350-1	444	1	49535.9	27	74	0.4505	Tubulin beta-4A chain isoform Iso 1 \Gname=TUBB4A
nxp:NX_P04406-1	335	65	36012.4	65	1264	0.8119	Glyceraldehyde-3-phosphate dehydrogenase isoform Iso 2 \Gname=GAPDH
nxp:NX_P04424-1	464	0	51607.3	4	36	0.1228	Argininosuccinate lyase isoform Iso 1 \Gname=ASL
nxp:NX_P04439-1	365	1	40797.2	9	34	0.2192	HLA class I histocompatibility antigen, A-3 alpha chain isoform Iso 1 \Gname=HLA-A
nxp:NX_P04632-1	268	13	28279.7	13	166	0.3246	Calpain small subunit 1 isoform Iso 1 \Gname=CAPNS1
nxp:NX_P04792-1	205	24	22750.5	24	618	0.722	Heat shock protein beta-1 isoform Iso 1 \Gname=HSPB1
nxp:NX_P04843-1	607	27	68508.8	27	344	0.4728	Dolichyl-diphosphooligosaccharide--protein glycosyltransferase subunit 1 isoform Iso 1 \Gname=RPN1
nxp:NX_P04844-1	631	0	69223	8	78	0.1933	Dolichyl-diphosphooligosaccharide--protein glycosyltransferase subunit 2 isoform Iso 1 \Gname=RPN2
nxp:NX_P04899-4	366	0	41503.6	23	287	0.5164	Guanine nucleotide-binding protein G(i) subunit alpha-2 isoform sGi2 \Gname=GNA12
nxp:NX_P04920-1	1241	0	136905	1	1	0.0137	Anion exchange protein 2 isoform A \Gname=SLC4A2
nxp:NX_P05023-4	1023	0	112910	8	38	0.0987	Sodium/potassium-transporting ATPase subunit alpha-1 isoform Iso 3 \Gname=ATP1A1
nxp:NX_P05067-1	770	0	86870	15	212	0.2026	Amyloid beta A4 protein isoform APP770 \Gname=APP
nxp:NX_P05106-1	788	85	86982.4	85	2237	0.5482	Integrin beta-3 isoform Beta-3A \Gname=ITGB3
nxp:NX_P05109-1	93	3	10809.6	3	6	0.3118	Protein S100-A8 isoform Iso 1 \Gname=S100A8
nxp:NX_P05121-1	402	9	45013	9	96	0.2164	Plasminogen activator inhibitor 1 isoform Iso 1 \Gname=SERPINE1
nxp:NX_P05141-1	298	5	32813.1	20	545	0.453	ADP/ATP translocase 2 isoform Iso 1 \Gname=SLC25A5
nxp:NX_P05161-1	165	3	17858.3	3	17	0.2606	Ubiquitin-like protein ISG15 isoform Iso 1 \Gname=ISG15
nxp:NX_P05165-1	728	0	79990.1	2	2	0.033	Propionyl-CoA carboxylase alpha chain, mitochondrial isoform Iso 1 \Gname=PCCA
nxp:NX_P05198-1	315	2	36071.4	2	2	0.0603	Eukaryotic translation initiation factor 2 subunit 1 isoform Iso 1 \Gname=EIF2S1
nxp:NX_P05386-1	114	1	11488.7	1	15	0.1404	60S acidic ribosomal protein P1 isoform Iso 1 \Gname=RPLP1
nxp:NX_P05387-1	115	1	11639.8	1	4	0.1043	60S acidic ribosomal protein P2 isoform Iso 1 \Gname=RPLP2
nxp:NX_P05388-1	317	0	34233.8	2	10	0.0726	60S acidic ribosomal protein P0 isoform Iso 1 \Gname=RPLP0
nxp:NX_P05534-1	365	8	40645	19	173	0.4247	HLA class I histocompatibility antigen, A-24 alpha chain isoform Iso 1 \Gname=HLA-A
nxp:NX_P05556-1	798	28	88339	28	680	0.297	Integrin beta-1 isoform Beta-1A \Gname=ITGB1
nxp:NX_P05771-2	673	16	76944.2	18	181	0.2526	Protein kinase C beta type isoform Beta-II \Gname=PRKCB
nxp:NX_P06132-1	367	7	40742.8	7	43	0.158	Uroporphyrinogen decarboxylase isoform Iso 1 \Gname=UROD
nxp:NX_P06241-1	537	0	60705.4	15	200	0.257	Tyrosine-protein kinase Fyn isoform Iso 1 \Gname=FYN
nxp:NX_P06396-1	782	0	85626.2	89	1917	0.624	Gelsolin isoform Iso 1 \Gname=GSN
nxp:NX_P06576-1	529	28	56506.6	28	567	0.4291	ATP synthase subunit beta, mitochondrial isoform Iso 1 \Gname=ATP5B
nxp:NX_P06702-1	114	3	13215.5	3	17	0.2456	Protein S100-A9 isoform Iso 1 \Gname=S100A9
nxp:NX_P06730-2	248	0	28741.6	3	38	0.1734	Eukaryotic translation initiation factor 4E isoform Iso 2 \Gname=EIF4E
nxp:NX_P06733-1	434	42	47121.3	51	695	0.6751	Alpha-enolase isoform MBP-1 \Gname=ENO1
nxp:NX_P06737-1	847	0	97069	28	407	0.2774	Glycogen phosphorylase, liver form isoform Iso 1 \Gname=PYGL
nxp:NX_P06744-1	558	13	63089.2	25	397	0.4211	Glucose-6-phosphate isomerase isoform Iso 1 \Gname=GPI
nxp:NX_P06753-1	285	1	32911.8	51	471	0.5263	Tropomyosin alpha-3 chain isoform Iso 1 \Gname=TPM3
nxp:NX_P06753-2	248	14	28996.7	63	726	0.7258	Tropomyosin alpha-3 chain isoform Iso 2 \Gname=TPM3
nxp:NX_P07093-3	409	0	45219.8	9	50	0.2396	Glia-derived nexin isoform Iso 2 \Gname=SERPINE2
nxp:NX_P07108-5	148	0	16466.4	5	27	0.2973	Acyl-CoA-binding protein isoform Iso 5 \Gname=DBI
nxp:NX_P07195-1	334	27	36597.1	32	858	0.5689	L-lactate dehydrogenase B chain isoform Iso 1 \Gname=LDHB
nxp:NX_P07203-1	203	14	22057.1	14	331	0.5172	Glutathione peroxidase 1 isoform Iso 1 \Gname=GPX1
nxp:NX_P07205-1	417	1	44749.3	6	13	0.1175	Phosphoglycerate kinase 2 isoform Iso 1 \Gname=PGK2
nxp:NX_P07225-1	676	19	75055.9	19	327	0.2973	Vitamin K-dependent protein S isoform Iso 1 \Gname=PROS1
nxp:NX_P07237-1	508	43	57062.7	43	753	0.5807	Protein disulfide-isomerase isoform Iso 1 \Gname=P4HB
nxp:NX_P07339-1	412	3	44505.6	3	9	0.0752	Cathepsin D isoform Iso 1 \Gname=CTSD
nxp:NX_P07355-2	357	1	40367.7	1	1	0.0392	Annexin A2 isoform Iso 1 \Gname=ANXA2
nxp:NX_P07359-1	626	37	68894	37	775	0.3466	Platelet glycoprotein Ib alpha chain isoform Iso 1 \Gname=GP1BA
nxp:NX_P07384-1	714	37	81820.2	37	889	0.3725	Calpain-1 catalytic subunit isoform Iso 1 \Gname=CAPN1
nxp:NX_P07437-1	444	24	49621	87	1765	0.714	Tubulin beta chain isoform Iso 1 \Gname=TUBB
nxp:NX_P07602-3	527	0	58427	7	34	0.1233	Proactivator polypeptide isoform Sap-mu-9 \Gname=PSAP
nxp:NX_P07737-1	140	48	15026.5	48	1488	0.8714	Profilin-1 isoform Iso 1 \Gname=PFN1
nxp:NX_P07741-1	180	0	19577.4	5	109	0.2889	Adenine phosphoribosyltransferase isoform Iso 1 \Gname=APRT
nxp:NX_P07814-1	1512	3	170465	3	4	0.0304	Bifunctional glutamate/proline--tRNA ligase isoform Iso 1 \Gname=EPRS
nxp:NX_P07864-1	332	1	36270.2	3	13	0.0602	L-lactate dehydrogenase C chain isoform Iso 1 \Gname=LDHC
nxp:NX_P07900-2	854	29	98081.5	51	826	0.3876	Heat shock protein HSP 90-alpha isoform Iso 1 \Gname=HSP90AA1
nxp:NX_P07947-1	543	3	60744.5	15	191	0.2449	Tyrosine-protein kinase Yes isoform Iso 1 \Gname=YES1
nxp:NX_P07948-2	491	10	55979.5	14	181	0.2668	Tyrosine-protein kinase Lyn isoform Iso 2 \Gname=LYN
nxp:NX_P07951-2	284	11	32951.6	38	381	0.5493	Tropomyosin beta chain isoform Iso 2 \Gname=TPM2
nxp:NX_P07954-1	510	9	54584.2	9	84	0.2353	Fumarate hydratase, mitochondrial isoform Cytoplasmic \Gname=FH
nxp:NX_P07996-1	1170	162	129282	162	3769	0.6419	Thrombospondin-1 isoform Iso 1 \Gname=THBS1
nxp:NX_P08107-1	641	19	69991	37	657	0.4883	Heat shock 70 kDa protein 1A/1B isoform Iso 1 \Gname=HSPA1A;HSPA1B
nxp:NX_P08134-1	193	1	21974.2	8	220	0.2746	Rho-related GTP-binding protein RhoC isoform Iso 1 \Gname=RHOC
nxp:NX_P08174-7	551	0	58982.8	2	2	0.049	Complement decay-accelerating factor isoform Iso 7 \Gname=CD55
nxp:NX_P08237-3	851	1	93176.5	2	9	0.0235	6-phosphofructokinase, muscle type isoform Iso 1 \Gname=PFKM
nxp:NX_P08238-1	724	15	83194.1	40	582	0.3826	Heat shock protein HSP 90-beta isoform Iso 1 \Gname=HSP90AB1
nxp:NX_P08514-1	1039	138	113288	138	3501	0.539	Integrin alpha-IIb isoform Iso 1 \Gname=ITGA2B
nxp:NX_P08559-4	428	0	47530.9	3	4	0.1121	Pyruvate dehydrogenase E1 component subunit alpha, somatic form, mitochondrial isoform Iso 4 \Gname=PDHA1
nxp:NX_P08567-1	350	70	40081.4	70	1050	0.6571	Pleckstrin isoform Iso 1 \Gname=PLEK
nxp:NX_P08574-1	325	8	35381	8	86	0.3477	Cytochrome c1, heme protein, mitochondrial isoform Iso 1 \Gname=CYC1
nxp:NX_P08575-1	1304	0	147144	2	5	0.0207	Receptor-type tyrosine-protein phosphatase C isoform Iso 1 \Gname=PTPRC
nxp:NX_P08603-1	1231	2	138987	2	2	0.0162	Complement factor H isoform Iso 1 \Gname=CFH
nxp:NX_P08670-1	466	2	53601.1	2	7	0.0429	Vimentin isoform Iso 1 \Gname=VIM
nxp:NX_P08754-1	354	1	40488.3	7	49	0.2034	Guanine nucleotide-binding protein G(k) subunit alpha isoform Iso 1 \Gname=GNAI3
nxp:NX_P08779-1	473	1	51218.2	5	22	0.074	Keratin, type I cytoskeletal 16 isoform Iso 1 \Gname=KRT16
nxp:NX_P08865-1	295	3	32815.4	3	8	0.1119	40S ribosomal protein SA isoform Iso 1 \Gname=RPSA
nxp:NX_P09104-1	434	14	47221	23	275	0.4562	Gamma-enolase isoform Iso 1 \Gname=ENO2
nxp:NX_P09110-1	424	2	44245.8	2	12	0.0542	3-ketoacyl-CoA thiolase, peroxisomal isoform Iso 1 \Gname=ACAA1
nxp:NX_P09211-1	210	26	23323	26	444	0.6333	Glutathione S-transferase P isoform Iso 1 \Gname=GSTP1
nxp:NX_P09327-1	827	2	92618.7	2	3	0.0326	Villin-1 isoform Iso 1 \Gname=VIL1
nxp:NX_P09382-1	135	4	14688.2	4	56	0.3185	Galectin-1 isoform Iso 1 \Gname=LGALS1
nxp:NX_P09417-1	244	1	25755	1	17	0.0697	Dihydropteridine reductase isoform Iso 1 \Gname=QDPR
nxp:NX_P09486-1	303	22	34591.7	22	437	0.4587	SPARC isoform Iso 1 \Gname=SPARC
nxp:NX_P09488-1	218	0	25677	6	25	0.2569	Glutathione S-transferase Mu 1 isoform Iso 1 \Gname=GSTM1
nxp:NX_P09493-2	228	7	26645.5	40	344	0.5044	Tropomyosin alpha-1 chain isoform Iso 2 \Gname=TPM1
nxp:NX_P09493-4	284	0	32809.8	49	438	0.5704	Tropomyosin alpha-1 chain isoform Iso 4 \Gname=TPM1
nxp:NX_P09493-5	245	3	28350.5	16	179	0.2571	Tropomyosin alpha-1 chain isoform Iso 5 \Gname=TPM1
nxp:NX_P09493-8	284	6	32778.7	43	405	0.5599	Tropomyosin alpha-1 chain isoform Iso 8 \Gname=TPM1
nxp:NX_P09496-1	248	0	27042	7	98	0.25	Clathrin light chain A isoform Brain \Gname=CLTA
nxp:NX_P09497-1	229	0	25157.1	3	13	0.083	Clathrin light chain B isoform Brain \Gname=CLTB
nxp:NX_P09543-1	421	6	47530.7	6	15	0.1449	2',3'-cyclic-nucleotide 3'-phosphodiesterase isoform CNPI \Gname=CNP
nxp:NX_P09622-1	509	11	54125	11	93	0.2377	Dihydrolipoyl dehydrogenase, mitochondrial isoform Iso 1 \Gname=DLD
nxp:NX_P09669-1	75	2	8757.7	2	6	0.2	Cytochrome c oxidase subunit 6C isoform Iso 1 \Gname=COX6C
nxp:NX_P09960-1	611	0	69223.2	4	8	0.0835	Leukotriene A-4 hydrolase isoform Iso 1 \Gname=LTA4H
nxp:NX_P09972-1	364	1	39413.2	4	8	0.1401	Fructose-bisphosphate aldolase C isoform Iso 1 \Gname=ALDOC
nxp:NX_P0C0L5-1	1744	0	192612	6	8	0.0499	Complement C4-B isoform Iso 1 \Gname=C4B;C4B_2
nxp:NX_P0C7P3-1	912	0	103822	7	41	0.0691	Schlafen family member 14 isoform Iso 1 \Gname=SLFN14
nxp:NX_P0C7P4-1	283	0	30778	3	23	0.0813	Putative cytochrome b-c1 complex subunit Rieske-like protein 1 isoform Iso 1 \Gname=UQCRFS1P1
nxp:NX_P0CG05-1	106	2	11268.5	5	45	0.6698	Ig lambda-2 chain C regions isoform Iso 1 \Gname=IGLC2
nxp:NX_P0CG48-1	685	0	76973.5	10	239	0.0774	Polyubiquitin-C isoform Iso 1 \Gname=UBC
nxp:NX_P10124-1	158	10	17622.6	10	119	0.2975	Serglycin isoform Iso 1 \Gname=SRGN
nxp:NX_P10301-1	218	4	23447.9	4	33	0.2798	Ras-related protein R-Ras isoform Iso 1 \Gname=RRAS
nxp:NX_P10316-1	365	4	40933.2	22	143	0.5041	HLA class I histocompatibility antigen, A-69 alpha chain isoform Iso 1 \Gname=HLA-A
nxp:NX_P10515-1	647	2	68935.1	2	5	0.0464	Dihydrolipoyllysine-residue acetyltransferase component of pyruvate dehydrogenase complex, mitochondrial isoform Iso 1 \Gname=DLAT
nxp:NX_P10599-1	105	4	11711.7	8	54	0.5143	Thioredoxin isoform Iso 1 \Gname=TXN
nxp:NX_P10606-1	129	3	13668.9	3	42	0.3333	Cytochrome c oxidase subunit 5B, mitochondrial isoform Iso 1 \Gname=COX5B
nxp:NX_P10619-1	480	12	54413.1	12	92	0.2292	Lysosomal protective protein isoform Iso 1 \Gname=CTSA
nxp:NX_P10644-1	381	12	42937	12	98	0.3517	cAMP-dependent protein kinase type I-alpha regulatory subunit isoform Iso 1 \Gname=PRKAR1A
nxp:NX_P10646-1	304	3	34974	3	5	0.1447	Tissue factor pathway inhibitor isoform Alpha \Gname=TFPI
nxp:NX_P10720-1	104	2	11527.3	7	96	0.3462	Platelet factor 4 variant isoform Iso 1 \Gname=PF4V1
nxp:NX_P10768-1	282	9	31424.4	9	204	0.4184	S-formylglutathione hydrolase isoform Iso 1 \Gname=ESD
nxp:NX_P10809-1	573	27	60998.4	27	519	0.445	60 kDa heat shock protein, mitochondrial isoform Iso 1 \Gname=HSPD1
nxp:NX_P10909-2	501	0	57777.6	19	285	0.3313	Clusterin isoform Iso 2 \Gname=CLU
nxp:NX_P11021-1	654	0	72270.4	58	1145	0.5596	78 kDa glucose-regulated protein isoform Iso 1 \Gname=HSPA5
nxp:NX_P11047-1	1609	1	177470	1	1	0.0106	Laminin subunit gamma-1 isoform Iso 1 \Gname=LAMC1
nxp:NX_P11055-1	1940	0	223748	4	7	0.0155	Myosin-3 isoform Iso 1 \Gname=MYH3
nxp:NX_P11142-1	646	40	70836.2	53	1011	0.5433	Heat shock cognate 71 kDa protein isoform Iso 1 \Gname=HSPA8
nxp:NX_P11169-1	496	7	53871.2	12	208	0.123	Solute carrier family 2, facilitated glucose transporter member 3 isoform Iso 1 \Gname=SLC2A3
nxp:NX_P11171-1	864	0	96939.3	6	27	0.0926	Protein 4.1 isoform Iso 1 \Gname=EPB41
nxp:NX_P11172-1	480	2	52170.6	2	8	0.0646	Uridine 5'-monophosphate synthase isoform Iso 2 \Gname=UMPS
nxp:NX_P11177-1	359	0	39190	2	10	0.0669	Pyruvate dehydrogenase E1 component subunit beta, mitochondrial isoform Iso 1 \Gname=PDHB
nxp:NX_P11216-1	843	27	96616.5	34	507	0.3321	Glycogen phosphorylase, brain form isoform Iso 1 \Gname=PYGB
nxp:NX_P11233-1	206	1	23534	4	22	0.1602	Ras-related protein Ral-A isoform Iso 1 \Gname=RALA
nxp:NX_P11234-1	206	13	23375.9	13	173	0.3544	Ras-related protein Ral-B isoform Iso 1 \Gname=RALB
nxp:NX_P11277-2	2328	27	267643	45	338	0.2156	Spectrin beta chain, erythrocytic isoform Iso 2 \Gname=SPTB
nxp:NX_P11279-1	417	5	44835.8	5	26	0.1175	Lysosome-associated membrane glycoprotein 1 isoform Iso 1 \Gname=LAMP1
nxp:NX_P11310-2	425	0	46971.8	8	55	0.2024	Medium-chain specific acyl-CoA dehydrogenase, mitochondrial isoform Iso 2 \Gname=ACADM
nxp:NX_P11413-2	561	0	63768.3	30	526	0.4332	Glucose-6-phosphate 1-dehydrogenase isoform Long \Gname=G6PD
nxp:NX_P11586-1	935	13	101477	13	130	0.154	C-1-tetrahydrofolate synthase, cytoplasmic isoform Iso 1 \Gname=MTHFD1
nxp:NX_P11766-1	374	13	39680.4	13	149	0.4171	Alcohol dehydrogenase class-3 isoform Iso 1 \Gname=ADH5
nxp:NX_P11908-2	321	0	35014.1	6	91	0.2368	Ribose-phosphate pyrophosphokinase 2 isoform Iso 2 \Gname=PRPS2
nxp:NX_P11940-1	636	0	70607.9	8	50	0.1399	Polyadenylate-binding protein 1 isoform Iso 1 \Gname=PABPC1
nxp:NX_P12074-1	109	4	12129.1	4	16	0.3303	Cytochrome c oxidase subunit 6A1, mitochondrial isoform Iso 1 \Gname=COX6A1
nxp:NX_P12081-1	509	0	57356.2	3	4	0.0747	Histidine--tRNA ligase, cytoplasmic isoform Iso 1 \Gname=HARS
nxp:NX_P12236-1	298	3	32827.2	18	491	0.4228	ADP/ATP translocase 3 isoform Iso 1 \Gname=SLC25A6
nxp:NX_P12259-1	2224	64	251528	64	1022	0.2536	Coagulation factor V isoform Iso 1 \Gname=F5
nxp:NX_P12268-1	514	2	55751.6	2	5	0.0603	Inosine-5'-monophosphate dehydrogenase 2 isoform Iso 1 \Gname=IMPDH2
nxp:NX_P12429-1	323	2	36334.6	2	4	0.0712	Annexin A3 isoform Iso 1 \Gname=ANXA3
nxp:NX_P12814-1	892	50	102975	161	3843	0.741	Alpha-actinin-1 isoform Iso 1 \Gname=ACTN1
nxp:NX_P12829-1	197	1	21532.8	1	1	0.066	Myosin light chain 4 isoform Iso 1 \Gname=MYL4
nxp:NX_P12931-1	536	20	59779	33	616	0.5261	Proto-oncogene tyrosine-protein kinase Src isoform Iso 1 \Gname=SRC
nxp:NX_P12955-1	493	0	54494.9	4	10	0.1237	Xaa-Pro dipeptidase isoform Iso 1 \Gname=PEPD
nxp:NX_P13073-1	169	4	19546	4	73	0.1716	Cytochrome c oxidase subunit 4 isoform 1, mitochondrial isoform Iso 1 \Gname=COX4I1
nxp:NX_P13224-2	411	1	43112	27	488	0.2482	Platelet glycoprotein Ib beta chain isoform Iso 2 \Gname=GP1BB
nxp:NX_P13473-3	411	0	45123.5	2	2	0.0487	Lysosome-associated membrane glycoprotein 2 isoform LAMP-2C \Gname=LAMP2
nxp:NX_P13489-1	461	14	49923.1	14	192	0.3818	Ribonuclease inhibitor isoform Iso 1 \Gname=RNH1
nxp:NX_P13501-1	91	6	9965	6	115	0.4835	C-C motif chemokine 5 isoform Iso 1 \Gname=CCL5
nxp:NX_P13598-1	275	4	30616.6	4	66	0.1527	Intercellular adhesion molecule 2 isoform Iso 1 \Gname=ICAM2
nxp:NX_P13639-1	858	8	95258.9	8	23	0.0932	Elongation factor 2 isoform Iso 1 \Gname=EEF2
nxp:NX_P13667-1	645	20	72869	20	293	0.3023	Protein disulfide-isomerase A4 isoform Iso 1 \Gname=PDIA4
nxp:NX_P13716-1	330	6	36253.4	12	210	0.3212	Delta-aminolevulinic acid dehydratase isoform Iso 1 \Gname=ALAD
nxp:NX_P13746-2	371	0	41420.5	11	54	0.3396	HLA class I histocompatibility antigen, A-11 alpha chain isoform Iso 2 \Gname=HLA-A
nxp:NX_P13747-1	358	7	40113.8	11	67	0.3268	HLA class I histocompatibility antigen, alpha chain E isoform Iso 1 \Gname=HLA-E
nxp:NX_P13796-1	627	7	70225.9	8	61	0.134	Plastin-2 isoform Iso 1 \Gname=LCP1
nxp:NX_P13797-1	630	9	70748.2	9	91	0.1429	Plastin-3 isoform Iso 1 \Gname=PLS3
nxp:NX_P13798-1	732	9	81154.6	9	46	0.1434	Acylamino-acid-releasing enzyme isoform Iso 1 \Gname=APEH
nxp:NX_P13804-1	333	4	35039.6	11	165	0.3964	Electron transfer flavoprotein subunit alpha, mitochondrial isoform Iso 1 \Gname=ETFA
nxp:NX_P13807-1	737	0	83714.5	1	1	0.019	Glycogen [starch] synthase, muscle isoform Iso 1 \Gname=GYS1
nxp:NX_P13861-1	404	2	45471.9	3	4	0.0842	cAMP-dependent protein kinase type II-alpha regulatory subunit isoform Iso 1 \Gname=PRKAR2A
nxp:NX_P13987-1	128	2	14149.8	2	21	0.2031	CD59 glycoprotein isoform Iso 1 \Gname=CD59
nxp:NX_P14174-1	115	2	12450.2	2	41	0.1478	Macrophage migration inhibitory factor isoform Iso 1 \Gname=MIF
nxp:NX_P14314-1	528	0	59369.8	11	134	0.2576	Glucosidase 2 subunit beta isoform Iso 1 \Gname=PRKCSH
nxp:NX_P14317-1	486	10	53963	10	127	0.1975	Hematopoietic lineage cell-specific protein isoform Iso 1 \Gname=HCLS1
nxp:NX_P14324-1	419	5	48226.6	5	68	0.1265	Farnesyl pyrophosphate synthase isoform Iso 2 \Gname=FDPS
nxp:NX_P14406-1	83	1	9372.1	1	4	0.1566	Cytochrome c oxidase subunit 7A2, mitochondrial isoform Iso 1 \Gname=COX7A2
nxp:NX_P14543-1	1247	26	136273	34	492	0.32	Nidogen-1 isoform Iso 1 \Gname=NID1
nxp:NX_P14550-1	325	4	36531.8	4	14	0.1446	Alcohol dehydrogenase [NADP(+)] isoform Iso 1 \Gname=AKR1A1
nxp:NX_P14618-1	531	62	57882	74	1397	0.6685	Pyruvate kinase PKM isoform M2 \Gname=PKM
nxp:NX_P14618-2	531	2	58006.9	55	681	0.6139	Pyruvate kinase PKM isoform M1 \Gname=PKM
nxp:NX_P14625-1	803	40	92393.3	43	694	0.3711	Endoplasmin isoform Iso 1 \Gname=HSP90B1
nxp:NX_P14735-1	1019	1	117875	1	1	0.0147	Insulin-degrading enzyme isoform Iso 2 \Gname=IDE
nxp:NX_P14770-1	177	11	19015.7	11	349	0.4181	Platelet glycoprotein IX isoform Iso 1 \Gname=GP9
nxp:NX_P14854-1	86	3	10167.7	3	22	0.4767	Cytochrome c oxidase subunit 6B1 isoform Iso 1 \Gname=COX6B1
nxp:NX_P14868-1	501	18	57082	18	203	0.4052	Aspartate--tRNA ligase, cytoplasmic isoform Iso 1 \Gname=DARS
nxp:NX_P14927-1	111	3	13504	3	10	0.2523	Cytochrome b-c1 complex subunit 7 isoform Iso 1 \Gname=UQCRB
nxp:NX_P15121-1	316	4	35812.5	4	29	0.1392	Aldose reductase isoform Iso 1 \Gname=AKR1B1
nxp:NX_P15153-1	192	7	21397.1	17	282	0.6198	Ras-related C3 botulinum toxin substrate 2 isoform Iso 1 \Gname=RAC2
nxp:NX_P15170-3	637	0	68638.1	15	115	0.2449	Eukaryotic peptide chain release factor GTP-binding subunit ERF3A isoform Iso 1 \Gname=GSPT1
nxp:NX_P15289-1	507	1	53535.7	1	1	0.0335	Arylsulfatase A isoform Iso 2 \Gname=ARSA
nxp:NX_P15498-1	845	0	98233.1	6	11	0.0805	Proto-oncogene vav isoform Iso 1 \Gname=VAV1
nxp:NX_P15529-2	399	0	44190.9	5	22	0.0752	Membrane cofactor protein isoform B \Gname=CD46
nxp:NX_P15531-2	177	1	19622.9	9	329	0.4407	Nucleoside diphosphate kinase A isoform Iso 1 \Gname=NME1
nxp:NX_P15907-1	406	1	46556.6	1	1	0.0394	Beta-galactoside alpha-2,6-sialyltransferase 1 isoform Iso 1 \Gname=ST6GAL1
nxp:NX_P16104-1	143	0	15117.4	1	7	0.1329	Histone H2A.x isoform Iso 1 \Gname=H2AFX
nxp:NX_P16109-1	830	39	90755.2	39	644	0.4084	P-selectin isoform Iso 1 \Gname=SELP
nxp:NX_P16152-1	277	9	30337.9	9	104	0.4404	Carbonyl reductase [NADPH] 1 isoform Iso 1 \Gname=CBR1
nxp:NX_P16157-14	1983	0	217326	11	52	0.0787	Ankyrin-1 isoform Er13 \Gname=ANK1
nxp:NX_P16188-1	365	3	40861.2	15	89	0.4247	HLA class I histocompatibility antigen, A-30 alpha chain isoform Iso 1 \Gname=HLA-A
nxp:NX_P16190-1	365	3	40848.2	12	47	0.3534	HLA class I histocompatibility antigen, A-33 alpha chain isoform Iso 1 \Gname=HLA-A
nxp:NX_P16278-1	677	4	76008.6	8	27	0.1448	Beta-galactosidase isoform Iso 3 \Gname=GLB1
nxp:NX_P16284-1	738	0	82465.8	28	530	0.3753	Platelet endothelial cell adhesion molecule isoform Long \Gname=PECAM1
nxp:NX_P16591-1	822	1	94559.7	1	8	0.0158	Tyrosine-protein kinase Fer isoform Iso 2 \Gname=FER
nxp:NX_P16615-1	1042	14	114664	39	433	0.3033	Sarcoplasmic/endoplasmic reticulum calcium ATPase 2 isoform Iso 1 \Gname=ATP2A2
nxp:NX_P16671-1	472	22	53001.2	22	377	0.3051	Platelet glycoprotein 4 isoform Iso 1 \Gname=CD36
nxp:NX_P16885-1	1265	8	147758	8	15	0.0569	1-phosphatidylinositol 4,5-bisphosphate phosphodiesterase gamma-2 isoform Iso 1 \Gname=PLCG2
nxp:NX_P16930-1	419	6	46326.2	6	67	0.1527	Fumarylacetoacetase isoform Iso 1 \Gname=FAH
nxp:NX_P17174-1	413	4	46200.5	4	13	0.1913	Aspartate aminotransferase, cytoplasmic isoform Iso 1 \Gname=GOT1
nxp:NX_P17252-1	672	4	76682.1	10	40	0.1429	Protein kinase C alpha type isoform Iso 1 \Gname=PRKCA
nxp:NX_P17301-1	1181	22	129196	22	282	0.2142	Integrin alpha-2 isoform Iso 1 \Gname=ITGA2
nxp:NX_P17405-1	629	0	69689.2	2	6	0.027	Sphingomyelin phosphodiesterase isoform Iso 1 \Gname=SMPD1
nxp:NX_P17568-1	137	2	16373.3	2	4	0.1387	NADH dehydrogenase [ubiquinone] 1 beta subcomplex subunit 7 isoform Iso 1 \Gname=NDUFB7
nxp:NX_P17612-1	351	0	40546	11	163	0.2707	cAMP-dependent protein kinase catalytic subunit alpha isoform Iso 1 \Gname=PRKACA
nxp:NX_P17858-1	780	7	84946.1	16	118	0.2192	6-phosphofructokinase, liver type isoform Iso 1 \Gname=PFKL
nxp:NX_P17980-1	439	5	49154.4	5	31	0.1253	26S protease regulatory subunit 6A isoform Iso 1 \Gname=PSMC3
nxp:NX_P17987-1	556	26	60287.6	27	397	0.4514	T-complex protein 1 subunit alpha isoform Iso 1 \Gname=TCP1
nxp:NX_P18031-1	435	9	49916.8	9	111	0.2828	Tyrosine-protein phosphatase non-receptor type 1 isoform Iso 1 \Gname=PTPN1
nxp:NX_P18054-1	663	25	75627.3	25	270	0.3484	Arachidonate 12-lipoxygenase, 12S-type isoform Iso 1 \Gname=ALOX12
nxp:NX_P18084-1	799	4	87978.2	4	24	0.0526	Integrin beta-5 isoform Iso 1 \Gname=ITGB5
nxp:NX_P18085-1	180	4	20479.7	10	203	0.45	ADP-ribosylation factor 4 isoform Iso 1 \Gname=ARF4
nxp:NX_P18206-1	1134	0	123704	160	3535	0.7125	Vinculin isoform Iso 2 \Gname=VCL
nxp:NX_P18433-1	802	0	90524.4	3	24	0.0449	Receptor-type tyrosine-protein phosphatase alpha isoform Iso 1 \Gname=PTPRA
nxp:NX_P18669-1	254	8	28767.8	8	167	0.3583	Phosphoglycerate mutase 1 isoform Iso 1 \Gname=PGAM1
nxp:NX_P18859-2	116	1	13361.9	1	5	0.1638	ATP synthase-coupling factor 6, mitochondrial isoform Iso 1 \Gname=ATP5J
nxp:NX_P19086-1	355	11	40879.9	13	221	0.431	Guanine nucleotide-binding protein G(z) subunit alpha isoform Iso 1 \Gname=GNAZ
nxp:NX_P19367-3	921	0	102654	40	585	0.38	Hexokinase-1 isoform Iso 3 \Gname=HK1
nxp:NX_P19404-1	249	3	27356	3	27	0.1647	NADH dehydrogenase [ubiquinone] flavoprotein 2, mitochondrial isoform Iso 1 \Gname=NDUFV2
nxp:NX_P19474-1	475	1	54117.1	1	1	0.0358	E3 ubiquitin-protein ligase TRIM21 isoform Iso 1 \Gname=TRIM21
nxp:NX_P19634-1	815	3	90687	3	22	0.0417	Sodium/hydrogen exchanger 1 isoform Iso 1 \Gname=SLC9A1
nxp:NX_P19652-1	201	2	23569.6	2	2	0.0945	Alpha-1-acid glycoprotein 2 isoform Iso 1 \Gname=ORM2
nxp:NX_P19875-1	107	0	11363.3	1	4	0.1495	C-X-C motif chemokine 2 isoform Iso 1 \Gname=CXCL2
nxp:NX_P19971-2	487	0	50355.4	19	252	0.3943	Thymidine phosphorylase isoform Iso 2 \Gname=TYMP
nxp:NX_P20042-1	333	2	38346.4	2	5	0.0781	Eukaryotic translation initiation factor 2 subunit 2 isoform Iso 1 \Gname=EIF2S2
nxp:NX_P20073-1	488	0	52687.7	3	10	0.0533	Annexin A7 isoform Iso 1 \Gname=ANXA7
nxp:NX_P20338-1	218	4	24356.2	4	43	0.2156	Ras-related protein Rab-4A isoform Iso 1 \Gname=RAB4A
nxp:NX_P20339-1	215	4	23625.8	7	29	0.4233	Ras-related protein Rab-5A isoform Iso 1 \Gname=RAB5A
nxp:NX_P20340-2	208	0	23515.9	8	50	0.2308	Ras-related protein Rab-6A isoform Iso 4 \Gname=RAB6A
nxp:NX_P20591-1	662	5	75455.2	6	15	0.0952	Interferon-induced GTP-binding protein Mx1 isoform Iso 1 \Gname=MX1
nxp:NX_P20618-1	241	4	26454.4	4	69	0.2075	Proteasome subunit beta type-1 isoform Iso 1 \Gname=PSMB1
nxp:NX_P20645-1	277	6	30955.4	6	72	0.2058	Cation-dependent mannose-6-phosphate receptor isoform Iso 1 \Gname=M6PR
nxp:NX_P20674-1	150	7	16733.7	7	130	0.3667	Cytochrome c oxidase subunit 5A, mitochondrial isoform Iso 1 \Gname=COX5A
nxp:NX_P20810-6	791	0	84873.5	3	12	0.0493	Calpastatin isoform Iso 1 \Gname=CAST
nxp:NX_P20936-1	1047	0	116311	5	65	0.0554	Ras GTPase-activating protein 1 isoform Iso 1 \Gname=RASA1
nxp:NX_P20962-1	102	1	11505.2	1	3	0.1275	Parathymosin isoform Iso 1 \Gname=PTMS
nxp:NX_P21281-1	511	8	56446.9	8	60	0.1781	V-type proton ATPase subunit B, brain isoform isoform Iso 1 \Gname=ATP6V1B2
nxp:NX_P21291-1	193	20	20535.8	20	548	0.6684	Cysteine and glycine-rich protein 1 isoform Iso 1 \Gname=CSRP1
nxp:NX_P21333-1	2647	0	280546	451	11473	0.7726	Filamin-A isoform Iso 1 \Gname=FLNA
nxp:NX_P21399-1	889	8	98318.6	8	59	0.099	Cytoplasmic aconitate hydratase isoform Iso 1 \Gname=ACO1
nxp:NX_P21731-3	343	2	37388.8	2	17	0.0554	Thromboxane A2 receptor isoform Iso 1 \Gname=TBXA2R
nxp:NX_P21796-1	283	9	30735.6	12	135	0.3675	Voltage-dependent anion-selective channel protein 1 isoform Iso 1 \Gname=VDAC1
nxp:NX_P21926-1	228	20	25381	20	295	0.2544	CD9 antigen isoform Iso 1 \Gname=CD9
nxp:NX_P21964-1	271	7	29999.6	7	31	0.3875	Catechol O-methyltransferase isoform Soluble \Gname=COMT
nxp:NX_P22061-2	228	0	24645.5	8	205	0.4518	Protein-L-isoaspartate(D-aspartate) O-methyltransferase isoform Iso 2 \Gname=PCMT1
nxp:NX_P22102-1	1010	2	107681	2	19	0.0297	Trifunctional purine biosynthetic protein adenosine-3 isoform Short \Gname=GART
nxp:NX_P22234-2	432	0	47909.6	6	26	0.1574	Multifunctional protein ADE2 isoform Iso 2 \Gname=PAICS
nxp:NX_P22307-1	547	0	58937.6	6	31	0.0859	Non-specific lipid-transfer protein isoform SCPx \Gname=SCP2
nxp:NX_P22314-1	1058	10	117756	32	403	0.345	Ubiquitin-like modifier-activating enzyme 1 isoform Iso 1 \Gname=UBA1
nxp:NX_P22392-2	267	8	30099.6	16	412	0.4457	Nucleoside diphosphate kinase B isoform Iso 1 \Gname=NME2
nxp:NX_P22694-2	398	12	46188.7	13	174	0.3266	cAMP-dependent protein kinase catalytic subunit beta isoform Iso 2 \Gname=PRKACB
nxp:NX_P22695-1	453	10	48394.9	10	168	0.3179	Cytochrome b-c1 complex subunit 2, mitochondrial isoform Iso 1 \Gname=UQCRC2
nxp:NX_P23219-1	599	0	68623.7	27	325	0.3523	Prostaglandin G/H synthase 1 isoform Iso 1 \Gname=PTGS1
nxp:NX_P23229-6	1112	0	123933	45	640	0.3867	Integrin alpha-6 isoform Alpha-6X1X2A \Gname=ITGA6
nxp:NX_P23284-1	216	17	23709.5	18	399	0.5231	Peptidyl-prolyl cis-trans isomerase B isoform Iso 1 \Gname=PPIB
nxp:NX_P23368-1	584	14	65383.8	16	231	0.3425	NAD-dependent malic enzyme, mitochondrial isoform Iso 1 \Gname=ME2
nxp:NX_P23381-1	471	7	53113.6	7	36	0.155	Tryptophan--tRNA ligase, cytoplasmic isoform Iso 2 \Gname=WARS
nxp:NX_P23526-1	432	12	47667.2	12	78	0.2708	Adenosylhomocysteinase isoform Iso 2 \Gname=AHCY
nxp:NX_P23528-1	166	49	18472.6	51	835	0.8795	Cofilin-1 isoform Iso 1 \Gname=CFL1
nxp:NX_P23588-1	611	3	69092.3	3	3	0.0786	Eukaryotic translation initiation factor 4B isoform Iso 1 \Gname=EIF4B
nxp:NX_P23919-1	212	4	23786.5	4	4	0.1887	Thymidylate kinase isoform Iso 1 \Gname=DTYMK
nxp:NX_P24534-1	225	6	24730.3	7	67	0.4133	Elongation factor 1-beta isoform Iso 1 \Gname=EEF1B2
nxp:NX_P24539-1	256	7	28872.3	7	118	0.2852	ATP synthase subunit b, mitochondrial isoform Iso 1 \Gname=ATP5F1
nxp:NX_P24557-1	533	25	60461.1	25	367	0.3734	Thromboxane-A synthase isoform Iso 2 \Gname=TBXAS1
nxp:NX_P24666-1	158	1	18012.8	4	11	0.2658	Low molecular weight phosphotyrosine protein phosphatase isoform Iso 1 \Gname=ACP1
nxp:NX_P24752-1	427	1	45152.6	1	1	0.0281	Acetyl-CoA acetyltransferase, mitochondrial isoform Iso 1 \Gname=ACAT1
nxp:NX_P24844-1	172	9	19796.4	27	369	0.6221	Myosin regulatory light polypeptide 9 isoform Iso 1 \Gname=MYL9
nxp:NX_P25098-1	689	1	79504.4	1	1	0.0232	Beta-adrenergic receptor kinase 1 isoform Iso 1 \Gname=ADRBK1
nxp:NX_P25325-1	297	10	33139.6	10	116	0.4916	3-mercaptopyruvate sulfurtransferase isoform Iso 1 \Gname=MPST
nxp:NX_P25398-1	132	3	14487.5	3	6	0.2576	40S ribosomal protein S12 isoform Iso 1 \Gname=RPS12
nxp:NX_P25685-1	340	1	38002.4	1	2	0.0294	DnaJ homolog subfamily B member 1 isoform Iso 1 \Gname=DNAJB1
nxp:NX_P25705-1	553	29	59695.6	29	496	0.3816	ATP synthase subunit alpha, mitochondrial isoform Iso 2 \Gname=ATP5A1
nxp:NX_P25786-2	269	0	30202.3	5	53	0.2119	Proteasome subunit alpha type-1 isoform Long \Gname=PSMA1
nxp:NX_P25787-1	234	6	25864.3	6	68	0.3675	Proteasome subunit alpha type-2 isoform Iso 1 \Gname=PSMA2
nxp:NX_P25788-1	255	0	28397.1	4	55	0.1529	Proteasome subunit alpha type-3 isoform Iso 1 \Gname=PSMA3
nxp:NX_P25789-1	261	7	29447.2	7	123	0.3142	Proteasome subunit alpha type-4 isoform Iso 2 \Gname=PSMA4
nxp:NX_P26038-1	577	44	67759.8	47	968	0.513	Moesin isoform Iso 1 \Gname=MSN
nxp:NX_P26196-1	483	3	54364.3	3	8	0.06	Probable ATP-dependent RNA helicase DDX6 isoform Iso 1 \Gname=DDX6
nxp:NX_P26440-1	423	6	46271.6	7	90	0.1844	Isovaleryl-CoA dehydrogenase, mitochondrial isoform Iso 1 \Gname=IVD
nxp:NX_P26447-1	101	11	11702.7	11	143	0.5347	Protein S100-A4 isoform Iso 1 \Gname=S100A4
nxp:NX_P26599-3	557	0	59577.9	7	51	0.219	Polypyrimidine tract-binding protein 1 isoform Iso 3 \Gname=PTBP1
nxp:NX_P26639-1	723	12	83363.9	16	175	0.2462	Threonine--tRNA ligase, cytoplasmic isoform Iso 1 \Gname=TARS
nxp:NX_P26640-1	1264	3	140369	3	6	0.0316	Valine--tRNA ligase isoform Iso 1 \Gname=VARS
nxp:NX_P26641-1	437	21	50069.1	21	344	0.4142	Elongation factor 1-gamma isoform Iso 1 \Gname=EEF1G
nxp:NX_P26885-1	142	4	15621.3	4	6	0.2746	Peptidyl-prolyl cis-trans isomerase FKBP2 isoform Iso 1 \Gname=FKBP2
nxp:NX_P27105-1	288	24	31692.7	24	432	0.5104	Erythrocyte band 7 integral membrane protein isoform Iso 1 \Gname=STOM
nxp:NX_P27338-1	520	13	58707.1	13	155	0.2654	Amine oxidase [flavin-containing] B isoform Iso 1 \Gname=MAOB
nxp:NX_P27348-1	245	11	27728.8	29	705	0.5347	14-3-3 protein theta isoform Iso 1 \Gname=YWHAQ
nxp:NX_P27708-1	2225	7	242811	7	42	0.0337	CAD protein isoform Iso 1 \Gname=CAD
nxp:NX_P27797-1	417	38	48093.8	38	648	0.6355	Calreticulin isoform Iso 1 \Gname=CALR
[truncated: 1,210 more rows]
