# Supplementary material for: Platelet proteome reveals novel pathways of platelet activation and platelet-mediated immunoregulation in dengue
Source: PLoS Pathog. 2017 May 19;13(5):e1006385. doi: 10.1371/journal.ppat.1006385 (PMC5453622; doi:10.1371/journal.ppat.1006385)
Supplement: S2 Table — (A) List of the proteins detected only in Control biological condition. (B) List of the proteins detected only in Dengue biological condition. (C) List of differentially expressed proteins detected in both biological conditions (Dengue and Control) with statistical significance (FDR < 0.05). These proteins represents the blue dots in volcano plot (Fig 1B). (D) List of all differentially expressed proteins, include the proteins detected in only one biological condition (at least 3 technical replicates). The function description was extracted from the Platelet Web (http://plateletweb.bioapps.biozentrum.uni-wuerzburg.de/plateletweb.php) or NextProt (https://www.nextprot.org). (XLSX) [file ppat.1006385.s003.xlsx]

## Sheet: (A) Proteins only in Control
Supplemental Table 2a: List of the proteins detected only in Control biological condition.
Entry	Replicate Count	Total Signal (NSAF)	Description
nxp:NX_Q9UNS2-1	8	0.000769552536165111	COP9 signalosome complex subunit 3 isoform Iso 1 \Gname=COPS3
nxp:NX_Q9Y512-1	7	0.000856703922178474	Sorting and assembly machinery component 50 homolog isoform Iso 1 \Gname=SAMM50
nxp:NX_P01891-1	6	0.00400623315888396	HLA class I histocompatibility antigen, A-68 alpha chain isoform Iso 1 \Gname=HLA-A
nxp:NX_P04424-3	6	0.000940982799562259	Argininosuccinate lyase isoform Iso 3 \Gname=ASL
nxp:NX_Q9Y4W6-1	6	0.000411080070469992	AFG3-like protein 2 isoform Iso 1 \Gname=AFG3L2
nxp:NX_P29350-4	5	0.00289432592871458	Tyrosine-protein phosphatase non-receptor type 6 isoform Iso 4 \Gname=PTPN6
nxp:NX_P49619-3	5	0.000350656308936423	Diacylglycerol kinase gamma isoform Iso 3 \Gname=DGKG
nxp:NX_P49619-1	5	0.00033336731266775	Diacylglycerol kinase gamma isoform Iso 1 \Gname=DGKG
nxp:NX_Q7Z6Z7-2	5	0.0000811264272405691	E3 ubiquitin-protein ligase HUWE1 isoform Iso 2 \Gname=HUWE1
nxp:NX_Q7Z6Z7-3	5	0.000080996327586346	E3 ubiquitin-protein ligase HUWE1 isoform Iso 3 \Gname=HUWE1
nxp:NX_Q7Z6Z7-1	5	0.000080829668476086	E3 ubiquitin-protein ligase HUWE1 isoform Iso 1 \Gname=HUWE1
nxp:NX_Q9BVJ7-1	4	0.00109551977507409	Dual specificity protein phosphatase 23 isoform Iso 1 \Gname=DUSP23
nxp:NX_P57088-1	4	0.000482838209739439	Transmembrane protein 33 isoform Iso 1 \Gname=TMEM33
nxp:NX_O95747-1	4	0.000432854567772476	Serine/threonine-protein kinase OSR1 isoform Iso 1 \Gname=OXSR1
nxp:NX_Q8TBC4-2	4	0.000363935810499319	NEDD8-activating enzyme E1 catalytic subunit isoform Iso 2 \Gname=UBA3
nxp:NX_Q8TBC4-1	4	0.000352931271952904	NEDD8-activating enzyme E1 catalytic subunit isoform Iso 1 \Gname=UBA3
nxp:NX_P49619-2	4	0.000300250716070101	Diacylglycerol kinase gamma isoform Iso 2 \Gname=DGKG
nxp:NX_P04196-1	4	0.000258566068467512	Histidine-rich glycoprotein isoform Iso 1 \Gname=HRG
nxp:NX_Q9UBC5-1	4	0.000188913179273084	Unconventional myosin-Ia isoform Iso 1 \Gname=MYO1A
nxp:NX_P60709-1	3	0.04806313593615	Actin, cytoplasmic 1 isoform Iso 1 \Gname=ACTB
nxp:NX_Q8N3F0-2	3	0.00175258291031686	UPF0452 protein C7orf41 isoform Iso 2 \Gname=C7orf41
nxp:NX_Q8N3F0-1	3	0.00165893344182665	UPF0452 protein C7orf41 isoform Iso 1 \Gname=C7orf41
nxp:NX_P30443-1	3	0.00159102687284874	HLA class I histocompatibility antigen, A-1 alpha chain isoform Iso 1 \Gname=HLA-A
nxp:NX_P30455-1	3	0.00159102687284874	HLA class I histocompatibility antigen, A-36 alpha chain isoform Iso 1 \Gname=HLA-A
nxp:NX_P48741-1	3	0.00131715340913048	Putative heat shock 70 kDa protein 7 isoform Iso 1 \Gname=HSPA7
nxp:NX_Q6QEF8-4	3	0.00120163139471524	Coronin-6 isoform Iso 4 \Gname=CORO6
nxp:NX_Q6QEF8-3	3	0.000999251370342151	Coronin-6 isoform Iso 3 \Gname=CORO6
nxp:NX_Q6QEF8-2	3	0.000995757484431863	Coronin-6 isoform Iso 2 \Gname=CORO6
nxp:NX_Q9H3K6-1	3	0.000912347197728978	BolA-like protein 2 isoform Iso 1 \Gname=BOLA2;BOLA2B
nxp:NX_P62330-1	3	0.000860331631638433	ADP-ribosylation factor 6 isoform Iso 1 \Gname=ARF6
nxp:NX_Q86YL5-1	3	0.000848236313564239	Testis development-related protein isoform Iso 1 \Gname=TDRP
nxp:NX_Q86YL5-2	3	0.000792544030350425	Testis development-related protein isoform Iso 2 \Gname=TDRP
nxp:NX_O96011-2	3	0.000745991890301163	Peroxisomal membrane protein 11B isoform Iso 2 \Gname=PEX11B
nxp:NX_O96011-1	3	0.000705668004338938	Peroxisomal membrane protein 11B isoform Iso 1 \Gname=PEX11B
nxp:NX_Q8WW12-2	3	0.000603552761574555	PEST proteolytic signal-containing nuclear protein isoform Iso 2 \Gname=PCNP
nxp:NX_Q6QEF8-1	3	0.000603361526583714	Coronin-6 isoform Iso 1 \Gname=CORO6
nxp:NX_Q6QEF8-5	3	0.000603361526583714	isoform Iso 5 \Gname=CORO6
nxp:NX_Q5NDL2-2	3	0.000503782041983318	EGF domain-specific O-linked N-acetylglucosamine transferase isoform Iso 2 \Gname=EOGT
nxp:NX_Q8WW12-1	3	0.000440796960700518	PEST proteolytic signal-containing nuclear protein isoform Iso 1 \Gname=PCNP
nxp:NX_P60228-1	3	0.000410901887475447	Eukaryotic translation initiation factor 3 subunit E isoform Iso 1 \Gname=EIF3E
nxp:NX_Q99816-1	3	0.000377798101581185	Tumor susceptibility gene 101 protein isoform Iso 1 \Gname=TSG101
nxp:NX_Q9Y5X3-1	3	0.000315137871279715	Sorting nexin-5 isoform Iso 1 \Gname=SNX5
nxp:NX_Q10471-1	3	0.000274822623484035	Polypeptide N-acetylgalactosaminyltransferase 2 isoform Iso 1 \Gname=GALNT2
nxp:NX_P28907-1	3	0.00026153953001564	ADP-ribosyl cyclase 1 isoform Iso 1 \Gname=CD38
nxp:NX_Q5NDL2-3	3	0.00023653874657456	EGF domain-specific O-linked N-acetylglucosamine transferase isoform Iso 3 \Gname=EOGT
nxp:NX_Q5JSP0-2	3	0.000206618448094944	FYVE, RhoGEF and PH domain-containing protein 3 isoform Iso 2 \Gname=FGD3
nxp:NX_Q86VN1-1	3	0.000203269064778995	Vacuolar protein-sorting-associated protein 36 isoform Iso 1 \Gname=VPS36
nxp:NX_Q5NDL2-1	3	0.000198836175963055	EGF domain-specific O-linked N-acetylglucosamine transferase isoform Iso 1 \Gname=EOGT
nxp:NX_Q53H12-1	3	0.000185928575840503	Acylglycerol kinase, mitochondrial isoform Iso 1 \Gname=AGK
nxp:NX_O94925-3	3	0.000184501876600461	Glutaminase kidney isoform, mitochondrial isoform Iso 3 \Gname=GLS
nxp:NX_Q5JSP0-1	3	0.000180684270471992	FYVE, RhoGEF and PH domain-containing protein 3 isoform Iso 1 \Gname=FGD3
nxp:NX_Q2TAA5-1	3	0.000173482823328455	GDP-Man:Man(3)GlcNAc(2)-PP-Dol alpha-1,2-mannosyltransferase isoform Iso 1 \Gname=ALG11
nxp:NX_O94925-1	3	0.000164920959950786	Glutaminase kidney isoform, mitochondrial isoform Iso 1 \Gname=GLS
nxp:NX_A2RUS2-2	3	0.00015418721093242	DENN domain-containing protein 3 isoform Iso 2 \Gname=DENND3
nxp:NX_A2RUS2-1	3	0.000147494610791781	DENN domain-containing protein 3 isoform Iso 1 \Gname=DENND3
nxp:NX_O43795-2	3	0.000134676439839933	Unconventional myosin-Ib isoform Iso 2 \Gname=MYO1B
nxp:NX_O43795-1	3	0.000127800354003035	Unconventional myosin-Ib isoform Iso 1 \Gname=MYO1B
nxp:NX_P08575-2	3	0.000126395568728863	Receptor-type tyrosine-protein phosphatase C isoform Iso 2 \Gname=PTPRC
nxp:NX_Q9NX65-1	3	0.000122458463525968	Zinc finger and SCAN domain-containing protein 32 isoform Iso 1 \Gname=ZSCAN32
nxp:NX_P08575-1	3	0.000110789980872002	Receptor-type tyrosine-protein phosphatase C isoform Iso 1 \Gname=PTPRC
nxp:NX_O15067-1	3	0.000101271718778331	Phosphoribosylformylglycinamidine synthase isoform Iso 1 \Gname=PFAS
nxp:NX_P30044-3	2	0.00275460791452079	Peroxiredoxin-5, mitochondrial isoform Iso 3 \Gname=PRDX5
nxp:NX_O95866-4	2	0.00251600412281055	Protein G6b isoform D \Gname=G6B
nxp:NX_Q9GZV4-1	2	0.00116841616759648	Eukaryotic translation initiation factor 5A-2 isoform Iso 1 \Gname=EIF5A2
nxp:NX_O75352-1	2	0.00107724196816471	Mannose-P-dolichol utilization defect 1 protein isoform Iso 1 \Gname=MPDU1
nxp:NX_O14949-1	2	0.00066931877260824	Cytochrome b-c1 complex subunit 8 isoform Iso 1 \Gname=UQCRQ
nxp:NX_Q9ULC4-1	2	0.000623171620341586	Malignant T-cell-amplified sequence 1 isoform Iso 1 \Gname=MCTS1
nxp:NX_Q9ULC4-3	2	0.0006197476004496	Malignant T-cell-amplified sequence 1 isoform Iso 3 \Gname=MCTS1
nxp:NX_P51571-1	2	0.000586102629639929	Translocon-associated protein subunit delta isoform Iso 1 \Gname=SSR4
nxp:NX_P68402-2	2	0.000561852553110081	Platelet-activating factor acetylhydrolase IB subunit beta isoform Iso 2 \Gname=PAFAH1B2
nxp:NX_P36405-1	2	0.000533910666913367	ADP-ribosylation factor-like protein 3 isoform Iso 1 \Gname=ARL3
nxp:NX_Q99961-2	2	0.000519278147389246	Endophilin-A2 isoform Iso 2 \Gname=SH3GL1
nxp:NX_O75190-2	2	0.000452036252679623	DnaJ homolog subfamily B member 6 isoform B \Gname=DNAJB6
nxp:NX_O75832-2	2	0.000447741619460492	26S proteasome non-ATPase regulatory subunit 10 isoform Iso 2 \Gname=PSMD10
nxp:NX_P68402-4	2	0.000431124483822092	Platelet-activating factor acetylhydrolase IB subunit beta isoform Iso 4 \Gname=PAFAH1B2
nxp:NX_Q9HA64-1	2	0.000424847590727086	Ketosamine-3-kinase isoform Iso 1 \Gname=FN3KRP
nxp:NX_Q99816-2	2	0.000419895513299869	Tumor susceptibility gene 101 protein isoform Iso 2 \Gname=TSG101
nxp:NX_Q9H425-1	2	0.000377101680642386	Uncharacterized protein C1orf198 isoform Iso 1 \Gname=C1orf198
nxp:NX_O94925-2	2	0.000341316631665088	Glutaminase kidney isoform, mitochondrial isoform Iso 2 \Gname=GLS
nxp:NX_O75832-1	2	0.000299154798843072	26S proteasome non-ATPase regulatory subunit 10 isoform Iso 1 \Gname=PSMD10
nxp:NX_O60831-1	2	0.000295136163412936	PRA1 family protein 2 isoform Iso 1 \Gname=PRAF2
nxp:NX_P55327-4	2	0.000272449428216973	Tumor protein D52 isoform Iso 4 \Gname=TPD52
nxp:NX_P13861-1	2	0.000267306158683356	cAMP-dependent protein kinase type II-alpha regulatory subunit isoform Iso 1 \Gname=PRKAR2A
nxp:NX_P55327-1	2	0.00025177246268265	Tumor protein D52 isoform Iso 1 \Gname=TPD52
nxp:NX_Q99501-3	2	0.000239342457286223	GAS2-like protein 1 isoform Iso 3 \Gname=GAS2L1
nxp:NX_P55327-3	2	0.000227407385648845	Tumor protein D52 isoform Iso 3 \Gname=TPD52
nxp:NX_O95858-1	2	0.0001918266382344	Tetraspanin-15 isoform Iso 1 \Gname=TSPAN15
nxp:NX_Q14410-1	2	0.000184227236249009	Glycerol kinase 2 isoform Iso 1 \Gname=GK2
nxp:NX_Q9H0X4-2	2	0.00017994766921895	Protein ITFG3 isoform Iso 2 \Gname=ITFG3
nxp:NX_Q16822-2	2	0.000177656427747208	Phosphoenolpyruvate carboxykinase [GTP], mitochondrial isoform Iso 2 \Gname=PCK2
nxp:NX_Q9H0X4-1	2	0.000176035763366364	Protein ITFG3 isoform Iso 1 \Gname=ITFG3
nxp:NX_O43776-1	2	0.0001589181491461	Asparagine--tRNA ligase, cytoplasmic isoform Iso 1 \Gname=NARS
nxp:NX_P84022-2	2	0.000158090011695222	Mothers against decapentaplegic homolog 3 isoform Iso 2 \Gname=SMAD3
nxp:NX_P23258-1	2	0.000149909056626462	Tubulin gamma-1 chain isoform Iso 1 \Gname=TUBG1
nxp:NX_Q9NRH3-1	2	0.000149909056626462	Tubulin gamma-2 chain isoform Iso 1 \Gname=TUBG2
nxp:NX_Q5M8T2-1	2	0.000148211838425553	Solute carrier family 35 member D3 isoform Iso 1 \Gname=SLC35D3
nxp:NX_P84022-1	2	0.00014172304577854	Mothers against decapentaplegic homolog 3 isoform Iso 1 \Gname=SMAD3
nxp:NX_O15198-2	2	0.000140075103385767	Mothers against decapentaplegic homolog 9 isoform B \Gname=SMAD9
nxp:NX_Q15796-2	2	0.000137831337427642	Mothers against decapentaplegic homolog 2 isoform Short \Gname=SMAD2
nxp:NX_Q9BZL4-2	2	0.000133238100661558	Protein phosphatase 1 regulatory subunit 12C isoform Iso 2 \Gname=PPP1R12C
nxp:NX_O15198-1	2	0.000128977075922655	Mothers against decapentaplegic homolog 9 isoform A \Gname=SMAD9
nxp:NX_Q15796-1	2	0.000128977075922655	Mothers against decapentaplegic homolog 2 isoform Long \Gname=SMAD2
nxp:NX_P40238-2	2	0.000127697897558556	Thrombopoietin receptor isoform Iso 2 \Gname=MPL
nxp:NX_Q16822-1	2	0.00012241638224456	Phosphoenolpyruvate carboxykinase [GTP], mitochondrial isoform Iso 1 \Gname=PCK2
nxp:NX_P40238-1	2	0.000116436350687251	Thrombopoietin receptor isoform Iso 1 \Gname=MPL
nxp:NX_O75746-1	2	0.000115895624443754	Calcium-binding mitochondrial carrier protein Aralar1 isoform Iso 1 \Gname=SLC25A12
nxp:NX_Q99501-1	2	0.000115629469085414	GAS2-like protein 1 isoform Iso 1 \Gname=GAS2L1
nxp:NX_Q15276-2	2	0.000115558738691991	Rab GTPase-binding effector protein 1 isoform Iso 2 \Gname=RABEP1
nxp:NX_Q92835-3	2	0.000115382562026459	Phosphatidylinositol 3,4,5-trisphosphate 5-phosphatase 1 isoform Iso 3 \Gname=INPP5D
nxp:NX_Q15750-2	2	0.000113100492738155	TGF-beta-activated kinase 1 and MAP3K7-binding protein 1 isoform Iso 2 \Gname=TAB1
nxp:NX_Q12931-1	2	0.00011161538831373	Heat shock protein 75 kDa, mitochondrial isoform Iso 1 \Gname=TRAP1
nxp:NX_Q15276-1	2	0.000111134796259467	Rab GTPase-binding effector protein 1 isoform Iso 1 \Gname=RABEP1
nxp:NX_P56181-2	2	0.000110226328280875	NADH dehydrogenase [ubiquinone] flavoprotein 3, mitochondrial isoform Iso 2 \Gname=NDUFV3
nxp:NX_Q15750-1	2	0.000103675451676642	TGF-beta-activated kinase 1 and MAP3K7-binding protein 1 isoform Iso 1 \Gname=TAB1
nxp:NX_Q92835-2	2	0.0000947924078601211	Phosphatidylinositol 3,4,5-trisphosphate 5-phosphatase 1 isoform Iso 2 \Gname=INPP5D
nxp:NX_Q92835-1	2	0.0000947126833791622	Phosphatidylinositol 3,4,5-trisphosphate 5-phosphatase 1 isoform Iso 1 \Gname=INPP5D
nxp:NX_P00751-2	2	0.0000841423955636514	Complement factor B isoform Iso 2 \Gname=CFB
nxp:NX_P48736-1	2	0.0000731227197360189	Phosphatidylinositol 4,5-bisphosphate 3-kinase catalytic subunit gamma isoform isoform Iso 1 \Gname=PIK3CG
nxp:NX_O75165-1	2	0.0000465915538520085	DnaJ homolog subfamily C member 13 isoform Iso 1 \Gname=DNAJC13
nxp:NX_Q6PEY2-1	1	0.00355908627723288	Tubulin alpha-3E chain isoform Iso 1 \Gname=TUBA3E
nxp:NX_Q13748-2	1	0.00350484607428325	Tubulin alpha-3C/D chain isoform Iso 2 \Gname=TUBA3C;TUBA3D
nxp:NX_P62491-2	1	0.00237772438832085	1A isoform Iso 2 \Gname=RAB11A
nxp:NX_Q14766-2	1	0.00121810345730574	Latent-transforming growth factor beta-binding protein 1 isoform Short \Gname=LTBP1
nxp:NX_P62136-3	1	0.000933326820952677	Serine/threonine-protein phosphatase PP1-alpha catalytic subunit isoform Iso 3 \Gname=PPP1CA
nxp:NX_P59998-2	1	0.00086914093678345	Actin-related protein 2/3 complex subunit 4 isoform Iso 2 \Gname=ARPC4
nxp:NX_Q96HC4-3	1	0.000692285155679256	PDZ and LIM domain protein 5 isoform Iso 3 \Gname=PDLIM5
nxp:NX_P04222-1	1	0.000652851552000626	HLA class I histocompatibility antigen, Cw-3 alpha chain isoform Iso 1 \Gname=HLA-C
nxp:NX_Q96HC4-2	1	0.000633115484253678	PDZ and LIM domain protein 5 isoform Iso 2 \Gname=PDLIM5
nxp:NX_P63098-1	1	0.000624730109096851	Calcineurin subunit B type 1 isoform Iso 1 \Gname=PPP3R1
nxp:NX_Q8N3F0-3	1	0.000590949335442575	UPF0452 protein C7orf41 isoform Iso 3 \Gname=C7orf41
nxp:NX_P10314-1	1	0.000523712149111735	HLA class I histocompatibility antigen, A-32 alpha chain isoform Iso 1 \Gname=HLA-A
nxp:NX_P30459-1	1	0.000523712149111735	HLA class I histocompatibility antigen, A-74 alpha chain isoform Iso 1 \Gname=HLA-A
nxp:NX_Q9HC38-3	1	0.000510738944353347	Glyoxalase domain-containing protein 4 isoform Iso 3 \Gname=GLOD4
nxp:NX_P61960-2	1	0.000485073497153466	Ubiquitin-fold modifier 1 isoform Iso 2 \Gname=UFM1
nxp:NX_Q9GZP8-2	1	0.000396488186005795	Immortalization up-regulated protein isoform Iso 2 \Gname=IMUP
nxp:NX_Q96CD2-2	1	0.000376289240995637	Phosphopantothenoylcysteine decarboxylase isoform Iso 2 \Gname=PPCDC
nxp:NX_Q15181-1	1	0.00033224540324716	Inorganic pyrophosphatase isoform Iso 1 \Gname=PPA1
nxp:NX_Q9ULC4-2	1	0.000327467909185797	Malignant T-cell-amplified sequence 1 isoform Iso 2 \Gname=MCTS1
nxp:NX_O14818-4	1	0.000320729755747959	Proteasome subunit alpha type-7 isoform Iso 3 \Gname=PSMA7
nxp:NX_Q9GZP8-1	1	0.000317938639721628	Immortalization up-regulated protein isoform Iso 1 \Gname=IMUP
nxp:NX_Q99832-4	1	0.000315851715586938	T-complex protein 1 subunit eta isoform Iso 4 \Gname=CCT7
nxp:NX_Q9Y2Q5-3	1	0.00030480544670196	Ragulator complex protein LAMTOR2 isoform Iso 3 \Gname=LAMTOR2
nxp:NX_P80723-2	1	0.000304333014194659	Brain acid soluble protein 1 isoform Iso 2 \Gname=BASP1
nxp:NX_P60468-1	1	0.000299229097028268	Protein transport protein Sec61 subunit beta isoform Iso 1 \Gname=SEC61B
nxp:NX_Q9BRG1-1	1	0.00029463206724079	Vacuolar protein-sorting-associated protein 25 isoform Iso 1 \Gname=VPS25
nxp:NX_Q53FT3-1	1	0.000293974796311535	Protein Hikeshi isoform Iso 1 \Gname=C11orf73
nxp:NX_P11217-2	1	0.00029359191858037	Glycogen phosphorylase, muscle form isoform Iso 2 \Gname=PYGM
nxp:NX_P60842-2	1	0.000284628286869089	Eukaryotic initiation factor 4A-I isoform Iso 2 \Gname=EIF4A1
nxp:NX_Q9NRW4-1	1	0.000281821977360756	Dual specificity protein phosphatase 22 isoform Iso 1 \Gname=DUSP22
nxp:NX_Q16595-2	1	0.000279466278400268	Frataxin, mitochondrial isoform Iso 2 \Gname=FXN
nxp:NX_Q9BS40-1	1	0.000260869526456632	Latexin isoform Iso 1 \Gname=LXN
nxp:NX_P35613-4	1	0.000256827372954517	Basigin isoform Iso 4 \Gname=BSG
nxp:NX_Q9NRW4-2	1	0.000252952408948191	Dual specificity protein phosphatase 22 isoform Iso 2 \Gname=DUSP22
nxp:NX_O95197-6	1	0.000248140463893609	isoform Iso 6 \Gname=RTN3
nxp:NX_Q9NZD2-1	1	0.00024811121451856	Glycolipid transfer protein isoform Iso 1 \Gname=GLTP
nxp:NX_P29279-2	1	0.000245262165166193	Connective tissue growth factor isoform Iso 2 \Gname=CTGF
nxp:NX_Q16595-3	1	0.000243820069420642	Frataxin, mitochondrial isoform Iso 3 \Gname=FXN
nxp:NX_Q96CD2-1	1	0.000234258498070813	Phosphopantothenoylcysteine decarboxylase isoform Iso 1 \Gname=PPCDC
nxp:NX_P80723-1	1	0.000231936614342185	Brain acid soluble protein 1 isoform Iso 1 \Gname=BASP1
nxp:NX_Q9Y2Q5-1	1	0.00023165213949349	Ragulator complex protein LAMTOR2 isoform Iso 1 \Gname=LAMTOR2
nxp:NX_Q16595-1	1	0.000227565398125933	Frataxin, mitochondrial isoform Iso 1 \Gname=FXN
nxp:NX_O95197-5	1	0.000220340494909678	isoform Iso 5 \Gname=RTN3
nxp:NX_Q86TP1-4	1	0.000218411927997204	Protein prune homolog isoform Iso 4 \Gname=PRUNE
nxp:NX_O15212-1	1	0.000214504173071317	Prefoldin subunit 6 isoform Iso 1 \Gname=PFDN6
nxp:NX_Q14353-1	1	0.000211705805961047	Guanidinoacetate N-methyltransferase isoform Iso 1 \Gname=GAMT
nxp:NX_Q96A08-1	1	0.000207281934864866	Histone H2B type 1-A isoform Iso 1 \Gname=HIST1H2BA
nxp:NX_O75323-1	1	0.000202493128927876	Protein NipSnap homolog 2 isoform Iso 1 \Gname=GBAS
nxp:NX_P42574-1	1	0.000199790890441876	Caspase-3 isoform Iso 1 \Gname=CASP3
nxp:NX_Q99436-1	1	0.000199790890441876	Proteasome subunit beta type-7 isoform Iso 1 \Gname=PSMB7
nxp:NX_O95989-1	1	0.000197587711969943	Diphosphoinositol polyphosphate phosphohydrolase 1 isoform Iso 1 \Gname=NUDT3
nxp:NX_Q8WVC6-2	1	0.000196421378160527	Dephospho-CoA kinase domain-containing protein isoform Iso 2 \Gname=DCAKD
nxp:NX_Q9GZN8-1	1	0.000195316588843852	UPF0687 protein C20orf27 isoform Iso 1 \Gname=C20orf27
nxp:NX_Q9Y2Q5-2	1	0.000193043449577908	Ragulator complex protein LAMTOR2 isoform Iso 2 \Gname=LAMTOR2
nxp:NX_O94905-2	1	0.000188986798123117	Erlin-2 isoform Iso 2 \Gname=ERLIN2
nxp:NX_Q15714-2	1	0.000182811150887764	TSC22 domain family protein 1 isoform Iso 2 \Gname=TSC22D1
nxp:NX_Q9Y5Y2-1	1	0.000176342190429689	Cytosolic Fe-S cluster assembly factor NUBP2 isoform Iso 1 \Gname=NUBP2
nxp:NX_Q96JJ7-2	1	0.000174282494660668	Protein disulfide-isomerase TMX3 isoform Iso 2 \Gname=TMX3
nxp:NX_Q9H9H4-1	1	0.000173273711479954	Vacuolar protein sorting-associated protein 37B isoform Iso 1 \Gname=VPS37B
nxp:NX_P12829-1	1	0.000172513129232641	Myosin light chain 4 isoform Iso 1 \Gname=MYL4
nxp:NX_Q9GZN8-2	1	0.000170779328938846	UPF0687 protein C20orf27 isoform Iso 2 \Gname=C20orf27
nxp:NX_Q07817-2	1	0.000168976431263022	Bcl-2-like protein 1 isoform Bcl-X(S) \Gname=BCL2L1
nxp:NX_Q9NZZ3-2	1	0.000167988264998326	Charged multivesicular body protein 5 isoform Iso 2 \Gname=CHMP5
nxp:NX_Q8ND76-2	1	0.000166612694479987	Cyclin-Y isoform Iso 2 \Gname=CCNY
nxp:NX_Q8N5M9-1	1	0.000158232335719597	Protein jagunal homolog 1 isoform Iso 1 \Gname=JAGN1
nxp:NX_P05067-10	1	0.000156377371539302	0 Amyloid beta A4 protein isoform APP639 \Gname=APP
nxp:NX_Q8ND76-1	1	0.000154397687553302	Cyclin-Y isoform Iso 1 \Gname=CCNY
nxp:NX_P38571-2	1	0.000153497409491767	Lysosomal acid lipase/cholesteryl ester hydrolase isoform Iso 2 \Gname=LIPA
nxp:NX_P08174-4	1	0.000152038672121977	Complement decay-accelerating factor isoform Iso 4 \Gname=CD55
nxp:NX_Q92747-1	1	0.000149573180141621	Actin-related protein 2/3 complex subunit 1A isoform Iso 1 \Gname=ARPC1A
nxp:NX_Q8NC51-4	1	0.000148454745812474	Plasminogen activator inhibitor 1 RNA-binding protein isoform Iso 4 \Gname=SERBP1
nxp:NX_P05067-3	1	0.000147599911984659	Amyloid beta A4 protein isoform L-APP677 \Gname=APP
nxp:NX_Q8NC51-3	1	0.000146188261143581	Plasminogen activator inhibitor 1 RNA-binding protein isoform Iso 3 \Gname=SERBP1
nxp:NX_P08174-1	1	0.000145254794363254	Complement decay-accelerating factor isoform Iso 2 \Gname=CD55
nxp:NX_Q7Z6V5-1	1	0.00014487454621047	tRNA-specific adenosine deaminase 2 isoform Iso 1 \Gname=ADAT2
nxp:NX_P08174-3	1	0.000144119991282291	Complement decay-accelerating factor isoform Iso 3 \Gname=CD55
nxp:NX_P05067-4	1	0.000143777180451243	Amyloid beta A4 protein isoform APP695 \Gname=APP
nxp:NX_P05067-5	1	0.000143570604042549	Amyloid beta A4 protein isoform L-APP696 \Gname=APP
nxp:NX_Q8NC51-2	1	0.000142915389625441	Plasminogen activator inhibitor 1 RNA-binding protein isoform Iso 2 \Gname=SERBP1
nxp:NX_Q8NC51-1	1	0.000140813692719185	Plasminogen activator inhibitor 1 RNA-binding protein isoform Iso 1 \Gname=SERBP1
nxp:NX_P05067-6	1	0.00013995117704988	Amyloid beta A4 protein isoform APP714 \Gname=APP
nxp:NX_O94905-3	1	0.000139446569488902	isoform Iso 3 \Gname=ERLIN2
nxp:NX_P35613-1	1	0.00013675223754721	Basigin isoform Iso 1 \Gname=BSG
nxp:NX_P23588-1	1	0.00013586434530049	Eukaryotic translation initiation factor 4B isoform Iso 1 \Gname=EIF4B
nxp:NX_Q9P035-1	1	0.0001320130762609	Very-long-chain (3R)-3-hydroxyacyl-[acyl-carrier protein] dehydratase 3 isoform Iso 1 \Gname=PTPLAD1
nxp:NX_P38571-1	1	0.000131953913422747	Lysosomal acid lipase/cholesteryl ester hydrolase isoform Iso 1 \Gname=LIPA
nxp:NX_Q9NZZ3-1	1	0.000131168919245268	Charged multivesicular body protein 5 isoform Iso 1 \Gname=CHMP5
nxp:NX_Q9BZK3-1	1	0.000129910978057276	Putative nascent polypeptide-associated complex subunit alpha-like protein isoform Iso 1 \Gname=NACAP1
nxp:NX_Q07817-3	1	0.000126546226056008	-like protein 1 isoform Bcl-X(beta) \Gname=BCL2L1
nxp:NX_P08174-5	1	0.000126063955928018	Complement decay-accelerating factor isoform Iso 5 \Gname=CD55
nxp:NX_P08174-2	1	0.000125777446937272	Complement decay-accelerating factor isoform Iso 1 \Gname=CD55
nxp:NX_Q07817-1	1	0.000123287524955853	Bcl-2-like protein 1 isoform Bcl-X(L) \Gname=BCL2L1
nxp:NX_Q12765-2	1	0.000120780789675873	isoform Iso 2 \Gname=SCRN1
nxp:NX_Q13148-2	1	0.000118709153297565	TAR DNA-binding protein 43 isoform Iso 2 \Gname=TARDBP
nxp:NX_Q8NDZ4-2	1	0.000118594712034681	Deleted in autism protein 1 isoform Iso 2 \Gname=C3orf58
nxp:NX_Q9P2R7-2	1	0.00011758558692603	Succinyl-CoA ligase [ADP-forming] subunit beta, mitochondrial isoform Iso 2 \Gname=SUCLA2
nxp:NX_Q8WVC6-1	1	0.000112240787520301	Dephospho-CoA kinase domain-containing protein isoform Iso 1 \Gname=DCAKD
nxp:NX_Q9P2R7-1	1	0.000111998366812914	Succinyl-CoA ligase [ADP-forming] subunit beta, mitochondrial isoform Iso 1 \Gname=SUCLA2
nxp:NX_Q6P996-2	1	0.000111910164963204	Pyridoxal-dependent decarboxylase domain-containing protein 1 isoform Iso 2 \Gname=PDXDC1
nxp:NX_P19474-1	1	0.000111793808996279	E3 ubiquitin-protein ligase TRIM21 isoform Iso 1 \Gname=TRIM21
nxp:NX_Q7Z6W7-1	1	0.000109732973229908	DnaJ homolog subfamily B member 7 isoform Iso 1 \Gname=DNAJB7
nxp:NX_Q15172-1	1	0.000107857742220842	Serine/threonine-protein phosphatase 2A 56 kDa regulatory subunit alpha isoform isoform Iso 1 \Gname=PPP2R5A
nxp:NX_Q01415-2	1	0.000106909918582653	N-acetylgalactosamine kinase isoform Iso 2 \Gname=GALK2
nxp:NX_Q9Y5K8-1	1	0.000106578160841449	V-type proton ATPase subunit D isoform Iso 1 \Gname=ATP6V1D
nxp:NX_P08174-6	1	0.000105413479337904	Complement decay-accelerating factor isoform Iso 6 \Gname=CD55
nxp:NX_Q01415-1	1	0.000104342213114511	N-acetylgalactosamine kinase isoform Iso 1 \Gname=GALK2
nxp:NX_Q00169-1	1	0.000102485327134074	Phosphatidylinositol transfer protein alpha isoform isoform Iso 1 \Gname=PITPNA
nxp:NX_P08174-7	1	0.000100439340566969	Complement decay-accelerating factor isoform Iso 7 \Gname=CD55
nxp:NX_Q9UJY5-4	1	0.000100257385239855	ADP-ribosylation factor-binding protein GGA1 isoform Iso 4 \Gname=GGA1
nxp:NX_P15289-1	1	0.0000974023821928736	Arylsulfatase A isoform Iso 1 \Gname=ARSA
nxp:NX_Q14103-4	1	0.0000964147676871075	Heterogeneous nuclear ribonucleoprotein D0 isoform Iso 4 \Gname=HNRNPD
nxp:NX_Q8NCW6-1	1	0.0000952517020943625	Polypeptide N-acetylgalactosaminyltransferase 11 isoform Iso 1 \Gname=GALNT11
nxp:NX_Q9HAB8-1	1	0.0000923665379894332	Phosphopantothenate--cysteine ligase isoform Iso 1 \Gname=PPCS
nxp:NX_O15264-1	1	0.0000923328652342262	Mitogen-activated protein kinase 13 isoform Iso 1 \Gname=MAPK13
nxp:NX_Q8NBQ5-1	1	0.0000922367944206662	Estradiol 17-beta-dehydrogenase 11 isoform Iso 1 \Gname=HSD17B11
nxp:NX_Q9UJY5-2	1	0.0000913235588323428	ADP-ribosylation factor-binding protein GGA1 isoform Iso 2 \Gname=GGA1
nxp:NX_Q14103-3	1	0.0000904282298241825	Heterogeneous nuclear ribonucleoprotein D0 isoform Iso 3 \Gname=HNRNPD
nxp:NX_Q96H79-1	1	0.0000877493524261267	Zinc finger CCCH-type antiviral protein 1-like isoform Iso 1 \Gname=ZC3HAV1L
nxp:NX_Q96AX1-1	1	0.0000870054426751327	Vacuolar protein sorting-associated protein 33A isoform Iso 1 \Gname=VPS33A
nxp:NX_Q9UJY5-1	1	0.0000866073187048509	ADP-ribosylation factor-binding protein GGA1 isoform Iso 1 \Gname=GGA1
nxp:NX_O94905-1	1	0.0000847374434062351	Erlin-2 isoform Iso 1 \Gname=ERLIN2
nxp:NX_O75477-1	1	0.0000830231020656466	Erlin-1 isoform Iso 1 \Gname=ERLIN1
nxp:NX_Q14103-2	1	0.0000823542807327377	Heterogeneous nuclear ribonucleoprotein D0 isoform Iso 2 \Gname=HNRNPD
nxp:NX_Q8WU76-2	1	0.0000811506163292318	Sec1 family domain-containing protein 2 isoform Iso 2 \Gname=SCFD2
nxp:NX_P33121-2	1	0.0000804390649017438	Long-chain-fatty-acid--CoA ligase 1 isoform Iso 2 \Gname=ACSL1
nxp:NX_Q6PI48-1	1	0.0000803957268750064	Aspartate--tRNA ligase, mitochondrial isoform Iso 1 \Gname=DARS2
nxp:NX_P33121-1	1	0.000079286642768481	Long-chain-fatty-acid--CoA ligase 1 isoform Iso 1 \Gname=ACSL1
nxp:NX_Q08752-1	1	0.0000782608579369897	Peptidyl-prolyl cis-trans isomerase D isoform Iso 1 \Gname=PPID
nxp:NX_Q14103-1	1	0.0000779465868343658	Heterogeneous nuclear ribonucleoprotein D0 isoform Iso 1 \Gname=HNRNPD
nxp:NX_P05165-3	1	0.0000773122047807284	Propionyl-CoA carboxylase alpha chain, mitochondrial isoform Iso 3 \Gname=PCCA
nxp:NX_P35626-1	1	0.0000761902074408852	Beta-adrenergic receptor kinase 2 isoform Iso 1 \Gname=ADRBK2
nxp:NX_Q8WU76-1	1	0.0000758117599917823	Sec1 family domain-containing protein 2 isoform Iso 1 \Gname=SCFD2
nxp:NX_Q9UKG1-1	1	0.0000752980171487915	DCC-interacting protein 13-alpha isoform Iso 1 \Gname=APPL1
nxp:NX_P05165-2	1	0.000074999446518057	Propionyl-CoA carboxylase alpha chain, mitochondrial isoform Iso 2 \Gname=PCCA
nxp:NX_Q96JJ7-1	1	0.0000748570186317847	Protein disulfide-isomerase TMX3 isoform Iso 1 \Gname=TMX3
nxp:NX_Q96EM0-1	1	0.0000740379416939676	Trans-L-3-hydroxyproline dehydratase isoform Iso 1 \Gname=L3HYPDH
nxp:NX_Q5H9R7-3	1	0.0000726320943482016	Serine/threonine-protein phosphatase 6 regulatory subunit 3 isoform Iso 3 \Gname=PPP6R3
nxp:NX_Q5H9R7-4	1	0.000072448911260312	Serine/threonine-protein phosphatase 6 regulatory subunit 3 isoform Iso 4 \Gname=PPP6R3
nxp:NX_P05165-1	1	0.0000723208948566978	Propionyl-CoA carboxylase alpha chain, mitochondrial isoform Iso 1 \Gname=PCCA
nxp:NX_P34896-3	1	0.0000718524005873107	Serine hydroxymethyltransferase, cytosolic isoform Iso 3 \Gname=SHMT1
nxp:NX_Q32P28-1	1	0.0000715347981734729	Prolyl 3-hydroxylase 1 isoform Iso 1 \Gname=LEPRE1
nxp:NX_Q99536-1	1	0.000070409766733333	Synaptic vesicle membrane protein VAT-1 homolog isoform Iso 1 \Gname=VAT1
nxp:NX_Q4AE62-2	1	0.0000702665720098244	Glycosyltransferase-like domain-containing protein 1 isoform Iso 2 \Gname=GTDC1
nxp:NX_P78362-2	1	0.0000683672869906235	SRSF protein kinase 2 isoform Iso 2 \Gname=SRPK2
nxp:NX_Q5H9R7-6	1	0.0000680710742054827	Serine/threonine-protein phosphatase 6 regulatory subunit 3 isoform Iso 6 \Gname=PPP6R3
nxp:NX_Q9BXW7-2	1	0.0000666906650373143	Cat eye syndrome critical region protein 5 isoform Iso 1 \Gname=CECR5
nxp:NX_A8MYA2-1	1	0.0000663771219899029	Putative uncharacterized protein CXorf49 isoform Iso 1 \Gname=CXorf49;CXorf49B
nxp:NX_Q5H9R7-2	1	0.0000662652671619693	Serine/threonine-protein phosphatase 6 regulatory subunit 3 isoform Iso 2 \Gname=PPP6R3
nxp:NX_Q9H254-2	1	0.0000658349732193592	Spectrin beta chain, non-erythrocytic 4 isoform Iso 2 \Gname=SPTBN4
nxp:NX_Q5H9R7-1	1	0.00006580983577254	Serine/threonine-protein phosphatase 6 regulatory subunit 3 isoform Iso 1 \Gname=PPP6R3
nxp:NX_Q32P28-3	1	0.0000654845913627811	Prolyl 3-hydroxylase 1 isoform Iso 3 \Gname=LEPRE1
nxp:NX_Q5H9R7-5	1	0.0000653606218764817	Serine/threonine-protein phosphatase 6 regulatory subunit 3 isoform Iso 5 \Gname=PPP6R3
nxp:NX_Q8NE71-2	1	0.0000652411542201686	ATP-binding cassette sub-family F member 1 isoform Iso 2 \Gname=ABCF1
nxp:NX_P34896-2	1	0.0000652173816141581	Serine hydroxymethyltransferase, cytosolic isoform Iso 2 \Gname=SHMT1
nxp:NX_Q14318-1	1	0.0000629311211582271	Peptidyl-prolyl cis-trans isomerase FKBP8 isoform Iso 1 \Gname=FKBP8
nxp:NX_Q14318-2	1	0.0000627787455622023	Peptidyl-prolyl cis-trans isomerase FKBP8 isoform Iso 2 \Gname=FKBP8
nxp:NX_Q8NE71-1	1	0.0000623072324919243	ATP-binding cassette sub-family F member 1 isoform Iso 1 \Gname=ABCF1
nxp:NX_Q9BXW7-1	1	0.0000619608306375048	Cat eye syndrome critical region protein 5 isoform Iso 2 \Gname=CECR5
nxp:NX_Q8NDZ4-1	1	0.0000609521659527082	Deleted in autism protein 1 isoform Iso 1 \Gname=C3orf58
nxp:NX_Q6P996-1	1	0.0000609257116360591	Pyridoxal-dependent decarboxylase domain-containing protein 1 isoform Iso 1 \Gname=PDXDC1
nxp:NX_P34896-1	1	0.0000599513818564932	Serine hydroxymethyltransferase, cytosolic isoform Iso 1 \Gname=SHMT1
nxp:NX_P53634-1	1	0.0000597646616116628	Dipeptidyl peptidase 1 isoform Iso 1 \Gname=CTSC
nxp:NX_Q32P44-1	1	0.0000578741560651552	Echinoderm microtubule-associated protein-like 3 isoform Iso 1 \Gname=EML3
nxp:NX_Q4AE62-1	1	0.000057225832663023	Glycosyltransferase-like domain-containing protein 1 isoform Iso 1 \Gname=GTDC1
nxp:NX_Q6YP21-1	1	0.0000571092993770695	Kynurenine--oxoglutarate transaminase 3 isoform Iso 1 \Gname=CCBL2
nxp:NX_Q13496-1	1	0.0000563600107111613	Myotubularin isoform Iso 1 \Gname=MTM1
nxp:NX_P34897-2	1	0.0000560142476238864	Serine hydroxymethyltransferase, mitochondrial isoform Iso 2 \Gname=SHMT2
nxp:NX_Q8N2G8-2	1	0.000055294158986634	GH3 domain-containing protein isoform Iso 2 \Gname=GHDC
nxp:NX_Q8N3Y1-2	1	0.0000539962280351762	F-box/WD repeat-containing protein 8 isoform Iso 2 \Gname=FBXW8
nxp:NX_Q8N2G8-3	1	0.0000533796972701925	GH3 domain-containing protein isoform Iso 3 \Gname=GHDC
nxp:NX_Q9HCC0-1	1	0.0000510230787117473	Methylcrotonoyl-CoA carboxylase beta chain, mitochondrial isoform Iso 1 \Gname=MCCC2
nxp:NX_Q9BZ72-2	1	0.0000501883779754171	Membrane-associated phosphatidylinositol transfer protein 2 isoform Iso 2 \Gname=PITPNM2
nxp:NX_Q8N2G8-1	1	0.0000494517572823859	GH3 domain-containing protein isoform Iso 1 \Gname=GHDC
nxp:NX_O15371-1	1	0.0000480379666566387	Eukaryotic translation initiation factor 3 subunit D isoform Iso 1 \Gname=EIF3D
nxp:NX_Q8N3Y1-1	1	0.0000480367781182504	F-box/WD repeat-containing protein 8 isoform Iso 1 \Gname=FBXW8
nxp:NX_Q93100-2	1	0.0000460060499141869	Phosphorylase b kinase regulatory subunit beta isoform Iso 2 \Gname=PHKB
nxp:NX_Q93100-4	1	0.0000460060499141869	Phosphorylase b kinase regulatory subunit beta isoform Iso 4 \Gname=PHKB
nxp:NX_Q93100-1	1	0.0000457114091553586	Phosphorylase b kinase regulatory subunit beta isoform Iso 1 \Gname=PHKB
nxp:NX_Q93100-3	1	0.0000457114091553586	Phosphorylase b kinase regulatory subunit beta isoform Iso 3 \Gname=PHKB
nxp:NX_A5YKK6-3	1	0.0000444546359129729	CCR4-NOT transcription complex subunit 1 isoform Iso 3 \Gname=CNOT1
nxp:NX_Q01970-2	1	0.0000428128279407087	1-phosphatidylinositol 4,5-bisphosphate phosphodiesterase beta-3 isoform Iso 2 \Gname=PLCB3
nxp:NX_Q15386-2	1	0.0000405621043572234	Ubiquitin-protein ligase E3C isoform Iso 2 \Gname=UBE3C
nxp:NX_Q01970-1	1	0.0000404883064884984	1-phosphatidylinositol 4,5-bisphosphate phosphodiesterase beta-3 isoform Iso 1 \Gname=PLCB3
nxp:NX_A5YKK6-2	1	0.0000403110363614052	CCR4-NOT transcription complex subunit 1 isoform Iso 2 \Gname=CNOT1
nxp:NX_A5YKK6-1	1	0.0000402262067394325	CCR4-NOT transcription complex subunit 1 isoform Iso 1 \Gname=CNOT1
nxp:NX_Q5VZK9-2	1	0.0000391065187287927	Leucine-rich repeat-containing protein 16A isoform Iso 2 \Gname=LRRC16A
nxp:NX_Q5VZK9-1	1	0.0000378229349630774	Leucine-rich repeat-containing protein 16A isoform Iso 1 \Gname=LRRC16A
nxp:NX_Q8WVT3-1	1	0.0000376476711921086	Trafficking protein particle complex subunit 12 isoform Iso 1 \Gname=TRAPPC12
nxp:NX_Q7KZI7-15	1	0.0000369667579120797	5 Serine/threonine-protein kinase MARK2 isoform Iso 15 \Gname=MARK2
nxp:NX_P33527-6	1	0.0000368551839618899	Multidrug resistance-associated protein 1 isoform Iso 6 \Gname=ABCC1
nxp:NX_Q7KZI7-5	1	0.0000364526166337476	Serine/threonine-protein kinase MARK2 isoform Iso 5 \Gname=MARK2
nxp:NX_Q7KZI7-16	1	0.0000362008720437355	6 Serine/threonine-protein kinase MARK2 isoform Iso 16 \Gname=MARK2
nxp:NX_Q7KZI7-4	1	0.0000361509398064338	Serine/threonine-protein kinase MARK2 isoform Iso 4 \Gname=MARK2
nxp:NX_Q7KZI7-9	1	0.0000357076721521315	Serine/threonine-protein kinase MARK2 isoform Iso 9 \Gname=MARK2
nxp:NX_P33527-4	1	0.0000353719262171754	Multidrug resistance-associated protein 1 isoform Iso 4 \Gname=ABCC1
nxp:NX_P33527-2	1	0.0000352277471700945	Multidrug resistance-associated protein 1 isoform Iso 2 \Gname=ABCC1
nxp:NX_Q7KZI7-14	1	0.0000351804447780732	4 Serine/threonine-protein kinase MARK2 isoform Iso 14 \Gname=MARK2
nxp:NX_P08237-2	1	0.000034616317646448	6-phosphofructokinase, muscle type isoform Iso 2 \Gname=PFKM
nxp:NX_Q7KZI7-11	1	0.0000339061207757626	1 Serine/threonine-protein kinase MARK2 isoform Iso 11 \Gname=MARK2
nxp:NX_P33527-1	1	0.0000338701788598165	Multidrug resistance-associated protein 1 isoform Iso 1 \Gname=ABCC1
nxp:NX_P33527-9	1	0.0000336503853565082	Multidrug resistance-associated protein 1 isoform Iso 9 \Gname=ABCC1
nxp:NX_Q7KZI7-8	1	0.0000336449696529711	Serine/threonine-protein kinase MARK2 isoform Iso 8 \Gname=MARK2
nxp:NX_Q7KZI7-1	1	0.0000332606996950057	Serine/threonine-protein kinase MARK2 isoform Iso 1 \Gname=MARK2
nxp:NX_A5YKK6-4	1	0.000030811562608927	CCR4-NOT transcription complex subunit 1 isoform Iso 4 \Gname=CNOT1
nxp:NX_Q8TB24-4	1	0.000029024840929861	Ras and Rab interactor 3 isoform Iso 4 \Gname=RIN3
nxp:NX_O15031-1	1	0.0000285195118168276	Plexin-B2 isoform Iso 1 \Gname=PLXNB2
nxp:NX_Q92538-1	1	0.000028321469314511	Golgi-specific brefeldin A-resistance guanine nucleotide exchange factor 1 isoform Iso 1 \Gname=GBF1
nxp:NX_Q14157-4	1	0.0000268539255734268	Ubiquitin-associated protein 2-like isoform Iso 4 \Gname=UBAP2L
nxp:NX_Q14157-1	1	0.0000266626972122732	Ubiquitin-associated protein 2-like isoform Iso 2 \Gname=UBAP2L
nxp:NX_Q8TB24-1	1	0.0000266085597560046	Ras and Rab interactor 3 isoform Iso 1 \Gname=RIN3
nxp:NX_Q9BWT7-1	1	0.0000255085326820136	Caspase recruitment domain-containing protein 10 isoform Iso 1 \Gname=CARD10
nxp:NX_Q14157-3	1	0.0000245406660671016	Ubiquitin-associated protein 2-like isoform Iso 3 \Gname=UBAP2L
nxp:NX_Q15714-1	1	0.0000245338357202591	TSC22 domain family protein 1 isoform Iso 1 \Gname=TSC22D1
nxp:NX_Q15386-1	1	0.0000243072998410323	Ubiquitin-protein ligase E3C isoform Iso 1 \Gname=UBE3C
nxp:NX_Q14157-2	1	0.0000241117123823961	Ubiquitin-associated protein 2-like isoform Iso 1 \Gname=UBAP2L
nxp:NX_Q14157-5	1	0.0000237404269562179	Ubiquitin-associated protein 2-like isoform Iso 5 \Gname=UBAP2L
nxp:NX_Q99683-1	1	0.0000188701760678235	Mitogen-activated protein kinase kinase kinase 5 isoform Iso 1 \Gname=MAP3K5
nxp:NX_P11047-1	1	0.0000178533208916804	Laminin subunit gamma-1 isoform Iso 1 \Gname=LAMC1
nxp:NX_Q8IWV7-1	1	0.0000165560419878137	E3 ubiquitin-protein ligase UBR1 isoform Iso 1 \Gname=UBR1
nxp:NX_Q5JSL3-1	1	0.0000163567239402034	Dedicator of cytokinesis protein 11 isoform Iso 1 \Gname=DOCK11

## Sheet: (B) Proteins only in Dengue
Supplemental Table 2b: List of the proteins detected only in Dengue biological condition.
Entry	Replicate Count	Total Signal (NSAF)	Description
nxp:NX_P00738-1	11	0.00456498452936907	Haptoglobin isoform Iso 1 \Gname=HP
nxp:NX_P30466-1	7	0.0045580147933528	HLA class I histocompatibility antigen, B-18 alpha chain isoform Iso 1 \Gname=HLA-B
nxp:NX_Q01469-1	7	0.00392120538230448	Fatty acid-binding protein, epidermal isoform Iso 1 \Gname=FABP5
nxp:NX_Q8N2U0-1	7	0.00229904934000601	Transmembrane protein 256 isoform Iso 1 \Gname=TMEM256
nxp:NX_P14550-1	7	0.00156353020318098	Alcohol dehydrogenase [NADP(+)] isoform Iso 1 \Gname=AKR1A1
nxp:NX_P30483-1	6	0.00406062275197489	HLA class I histocompatibility antigen, B-45 alpha chain isoform Iso 1 \Gname=HLA-B
nxp:NX_P30487-1	6	0.00406062275197489	HLA class I histocompatibility antigen, B-49 alpha chain isoform Iso 1 \Gname=HLA-B
nxp:NX_P30488-1	6	0.00406062275197489	HLA class I histocompatibility antigen, B-50 alpha chain isoform Iso 1 \Gname=HLA-B
nxp:NX_P18463-1	6	0.00317848270236197	HLA class I histocompatibility antigen, B-37 alpha chain isoform Iso 1 \Gname=HLA-B
nxp:NX_P23368-2	6	0.00225663979788958	NAD-dependent malic enzyme, mitochondrial isoform Iso 2 \Gname=ME2
nxp:NX_P08865-1	6	0.000900794002454026	40S ribosomal protein SA isoform Iso 1 \Gname=RPSA
nxp:NX_Q6YHK3-4	6	0.000303453871261114	CD109 antigen isoform Iso 4 \Gname=CD109
nxp:NX_Q6YHK3-1	6	0.000299883825716866	CD109 antigen isoform Iso 1 \Gname=CD109
nxp:NX_Q9Y3C8-1	5	0.00252487808851852	Ubiquitin-fold modifier-conjugating enzyme 1 isoform Iso 1 \Gname=UFC1
nxp:NX_Q9NVG8-2	5	0.0010756962801201	TBC1 domain family member 13 isoform Iso 2 \Gname=TBC1D13
nxp:NX_P05388-1	5	0.00107506954542952	60S acidic ribosomal protein P0 isoform Iso 1 \Gname=RPLP0
nxp:NX_Q8NHW5-1	5	0.00107506954542952	60S acidic ribosomal protein P0-like isoform Iso 1 \Gname=RPLP0P6
nxp:NX_Q9UNM6-1	5	0.000934634814112512	26S proteasome non-ATPase regulatory subunit 13 isoform Iso 1 \Gname=PSMD13
nxp:NX_Q16543-1	5	0.000792855492429914	Hsp90 co-chaperone Cdc37 isoform Iso 1 \Gname=CDC37
nxp:NX_Q9NVG8-1	5	0.00073954119258257	TBC1 domain family member 13 isoform Iso 1 \Gname=TBC1D13
nxp:NX_Q6YHK3-2	5	0.000263963024392722	CD109 antigen isoform Iso 2 \Gname=CD109
nxp:NX_P10319-1	4	0.00307774127023402	HLA class I histocompatibility antigen, B-58 alpha chain isoform Iso 1 \Gname=HLA-B
nxp:NX_P30485-1	4	0.002559858893356	HLA class I histocompatibility antigen, B-47 alpha chain isoform Iso 1 \Gname=HLA-B
nxp:NX_Q04826-1	4	0.002559858893356	HLA class I histocompatibility antigen, B-40 alpha chain isoform Iso 1 \Gname=HLA-B
nxp:NX_Q99878-1	4	0.00172347163966214	Histone H2A type 1-J isoform Iso 1 \Gname=HIST1H2AJ
nxp:NX_Q16777-1	4	0.00171011139439344	Histone H2A type 2-C isoform Iso 1 \Gname=HIST2H2AC
nxp:NX_Q9BTM1-1	4	0.00171011139439344	Histone H2A.J isoform Iso 1 \Gname=H2AFJ
nxp:NX_P04908-1	4	0.00169695669135964	Histone H2A type 1-B/E isoform Iso 1 \Gname=HIST1H2AB;HIST1H2AE
nxp:NX_P0C0S8-1	4	0.00169695669135964	Histone H2A type 1-H isoform Iso 1 \Gname=HIST1H2AH
nxp:NX_P20671-1	4	0.00169695669135964	Histone H2A type 1-D isoform Iso 1 \Gname=HIST1H2AD
nxp:NX_Q6FI13-1	4	0.00169695669135964	Histone H2A type 2-A isoform Iso 1 \Gname=HIST2H2AA3;HIST2H2AA4
nxp:NX_Q7L7L0-1	4	0.00169695669135964	Histone H2A type 3 isoform Iso 1 \Gname=HIST3H2A
nxp:NX_Q8IUE6-1	4	0.00169695669135964	Histone H2A type 2-B isoform Iso 1 \Gname=HIST2H2AB
nxp:NX_Q93077-1	4	0.00169695669135964	Histone H2A type 1-C isoform Iso 1 \Gname=HIST1H2AC
nxp:NX_Q96QV6-1	4	0.00168400282348667	Histone H2A type 1-A isoform Iso 1 \Gname=HIST1H2AA
nxp:NX_P16104-1	4	0.00154268790123604	Histone H2A.x isoform Iso 1 \Gname=H2AFX
nxp:NX_O14737-1	4	0.00138958003976433	Programmed cell death protein 5 isoform Iso 1 \Gname=PDCD5
nxp:NX_P09341-1	4	0.00111779118745161	Growth-regulated alpha protein isoform Iso 1 \Gname=CXCL1
nxp:NX_P19875-1	4	0.00111779118745161	C-X-C motif chemokine 2 isoform Iso 1 \Gname=CXCL2
nxp:NX_P19876-1	4	0.00111779118745161	C-X-C motif chemokine 3 isoform Iso 1 \Gname=CXCL3
nxp:NX_O95870-2	4	0.00108916330643274	Abhydrolase domain-containing protein 16A isoform Iso 2 \Gname=ABHD16A
nxp:NX_Q15126-1	4	0.00101124814963384	Phosphomevalonate kinase isoform Iso 1 \Gname=PMVK
nxp:NX_P20591-1	4	0.000916916961024127	Interferon-induced GTP-binding protein Mx1 isoform Iso 1 \Gname=MX1
nxp:NX_Q13643-1	4	0.000896837535648845	Four and a half LIM domains protein 3 isoform Iso 1 \Gname=FHL3
nxp:NX_P12268-1	4	0.000352034183710744	Inosine-5'-monophosphate dehydrogenase 2 isoform Iso 1 \Gname=IMPDH2
nxp:NX_P63267-1	3	0.0215485080956596	Actin, gamma-enteric smooth muscle isoform Iso 1 \Gname=ACTG2
nxp:NX_P62736-1	3	0.021491350249252	Actin, aortic smooth muscle isoform Iso 1 \Gname=ACTA2
nxp:NX_P63313-1	3	0.0077240356540372	Thymosin beta-10 isoform Iso 1 \Gname=TMSB10
nxp:NX_P62993-2	3	0.00275206083662677	Growth factor receptor-bound protein 2 isoform Iso 2 \Gname=GRB2
nxp:NX_P30464-1	3	0.00229162957775935	HLA class I histocompatibility antigen, B-15 alpha chain isoform Iso 1 \Gname=HLA-B
nxp:NX_P30484-1	3	0.00229162957775935	HLA class I histocompatibility antigen, B-46 alpha chain isoform Iso 1 \Gname=HLA-B
nxp:NX_P30495-1	3	0.00229162957775935	HLA class I histocompatibility antigen, B-56 alpha chain isoform Iso 1 \Gname=HLA-B
nxp:NX_P30481-1	3	0.00188025716143511	HLA class I histocompatibility antigen, B-44 alpha chain isoform Iso 1 \Gname=HLA-B
nxp:NX_Q5JSH3-4	3	0.00162087330799185	WD repeat-containing protein 44 isoform Iso 4 \Gname=WDR44
nxp:NX_Q9Y2Q3-4	3	0.00155069532173633	Glutathione S-transferase kappa 1 isoform Iso 4 \Gname=GSTK1
nxp:NX_O14556-1	3	0.00148168131392464	Glyceraldehyde-3-phosphate dehydrogenase, testis-specific isoform Iso 1 \Gname=GAPDHS
nxp:NX_Q8N0U8-1	3	0.00122621549660738	Vitamin K epoxide reductase complex subunit 1-like protein 1 isoform Iso 1 \Gname=VKORC1L1
nxp:NX_P08779-1	3	0.00122285899408693	Keratin, type I cytoskeletal 16 isoform Iso 1 \Gname=KRT16
nxp:NX_Q9H2U2-6	3	0.00107448257406915	Inorganic pyrophosphatase 2, mitochondrial isoform Iso 5 \Gname=PPA2
nxp:NX_Q9P289-1	3	0.00100036280534108	Serine/threonine-protein kinase MST4 isoform Iso 1 \Gname=MST4
nxp:NX_P20962-1	3	0.000909221901208234	Parathymosin isoform Iso 1 \Gname=PTMS
nxp:NX_Q9H2U2-3	3	0.000817311335029649	Inorganic pyrophosphatase 2, mitochondrial isoform Iso 3 \Gname=PPA2
nxp:NX_Q9H2U2-1	3	0.000746347177197734	Inorganic pyrophosphatase 2, mitochondrial isoform Iso 1 \Gname=PPA2
nxp:NX_Q9H2U2-2	3	0.000714269218292386	Inorganic pyrophosphatase 2, mitochondrial isoform Iso 2 \Gname=PPA2
nxp:NX_Q15642-5	3	0.0006932480639062	Cdc42-interacting protein 4 isoform Iso 5 \Gname=TRIP10
nxp:NX_P20073-2	3	0.000664572010185728	Annexin A7 isoform Iso 2 \Gname=ANXA7
nxp:NX_Q9UNM6-2	3	0.00064568486054075	26S proteasome non-ATPase regulatory subunit 13 isoform Iso 2 \Gname=PSMD13
nxp:NX_P20073-1	3	0.000634611796611781	Annexin A7 isoform Iso 1 \Gname=ANXA7
nxp:NX_P51668-1	3	0.000536733364747306	Ubiquitin-conjugating enzyme E2 D1 isoform Iso 1 \Gname=UBE2D1
nxp:NX_P61077-1	3	0.000536733364747306	Ubiquitin-conjugating enzyme E2 D3 isoform Iso 1 \Gname=UBE2D3
nxp:NX_P62837-1	3	0.000536733364747306	Ubiquitin-conjugating enzyme E2 D2 isoform Iso 2 \Gname=UBE2D2
nxp:NX_Q9Y2X8-1	3	0.000536733364747306	Ubiquitin-conjugating enzyme E2 D4 isoform Iso 1 \Gname=UBE2D4
nxp:NX_Q08380-1	3	0.000536057686943807	Galectin-3-binding protein isoform Iso 1 \Gname=LGALS3BP
nxp:NX_P61077-2	3	0.000533106787958473	Ubiquitin-conjugating enzyme E2 D3 isoform Iso 2 \Gname=UBE2D3
nxp:NX_P61077-3	3	0.000529528890052711	Ubiquitin-conjugating enzyme E2 D3 isoform Iso 3 \Gname=UBE2D3
nxp:NX_P30566-2	3	0.000502773983702165	Adenylosuccinate lyase isoform Iso 2 \Gname=ADSL
nxp:NX_Q14BN4-8	3	0.000496978696064092	Sarcolemmal membrane-associated protein isoform Iso 8 \Gname=SLMAP
nxp:NX_Q9UMS0-1	3	0.000495333895046471	NFU1 iron-sulfur cluster scaffold homolog, mitochondrial isoform Iso 2 \Gname=NFU1
nxp:NX_Q13126-4	3	0.000489494131927729	S-methyl-5'-thioadenosine phosphorylase isoform Iso 4 \Gname=MTAP
nxp:NX_Q13126-1	3	0.000484305148197046	S-methyl-5'-thioadenosine phosphorylase isoform Iso 1 \Gname=MTAP
nxp:NX_Q16563-1	3	0.000481321150767081	Synaptophysin-like protein 1 isoform Iso 2 \Gname=SYPL1
nxp:NX_Q96RI0-1	3	0.000480069171419532	Proteinase-activated receptor 4 isoform Iso 1 \Gname=F2RL3
nxp:NX_Q13126-3	3	0.000410354362095103	S-methyl-5'-thioadenosine phosphorylase isoform Iso 3 \Gname=MTAP
nxp:NX_O15194-2	3	0.000396277269796195	CTD small phosphatase-like protein isoform Iso 2 \Gname=CTDSPL
nxp:NX_Q13126-2	3	0.000396122418901052	S-methyl-5'-thioadenosine phosphorylase isoform Iso 2 \Gname=MTAP
nxp:NX_O15194-1	3	0.000380483610492723	CTD small phosphatase-like protein isoform Iso 1 \Gname=CTDSPL
nxp:NX_Q14BN4-5	3	0.000375156620148661	Sarcolemmal membrane-associated protein isoform Iso 5 \Gname=SLMAP
nxp:NX_O43390-1	3	0.000351040809569322	Heterogeneous nuclear ribonucleoprotein R isoform Iso 1 \Gname=HNRNPR
nxp:NX_O43390-2	3	0.000349384956693994	Heterogeneous nuclear ribonucleoprotein R isoform Iso 2 \Gname=HNRNPR
nxp:NX_O75306-2	3	0.000345294549749909	NADH dehydrogenase [ubiquinone] iron-sulfur protein 2, mitochondrial isoform Iso 2 \Gname=NDUFS2
nxp:NX_O75306-1	3	0.0003408198903579	NADH dehydrogenase [ubiquinone] iron-sulfur protein 2, mitochondrial isoform Iso 1 \Gname=NDUFS2
nxp:NX_Q96IJ6-1	3	0.000338258917667274	Mannose-1-phosphate guanyltransferase alpha isoform Iso 1 \Gname=GMPPA
nxp:NX_Q16512-3	3	0.000324465211286666	Serine/threonine-protein kinase N1 isoform Iso 3 \Gname=PKN1
nxp:NX_Q9GZU7-2	3	0.000303460786991746	Carboxy-terminal domain RNA polymerase II polypeptide A small phosphatase 1 isoform Iso 2 \Gname=CTDSP1
nxp:NX_Q9GZU7-3	3	0.000303460786991746	Carboxy-terminal domain RNA polymerase II polypeptide A small phosphatase 1 isoform Iso 3 \Gname=CTDSP1
nxp:NX_Q9GZU7-1	3	0.000302298101984115	Carboxy-terminal domain RNA polymerase II polypeptide A small phosphatase 1 isoform Iso 1 \Gname=CTDSP1
nxp:NX_Q96IJ6-2	3	0.00030035675564536	Mannose-1-phosphate guanyltransferase alpha isoform Iso 2 \Gname=GMPPA
nxp:NX_Q14BN4-4	3	0.000297967315560551	Sarcolemmal membrane-associated protein isoform Iso 4 \Gname=SLMAP
nxp:NX_Q6P2I3-1	3	0.000265940880447772	Fumarylacetoacetate hydrolase domain-containing protein 2B isoform Iso 1 \Gname=FAHD2B
nxp:NX_Q96GK7-1	3	0.000265940880447772	Fumarylacetoacetate hydrolase domain-containing protein 2A isoform Iso 1 \Gname=FAHD2A
nxp:NX_Q5W0V3-2	3	0.000263310479760761	Protein FAM160B1 isoform Iso 2 \Gname=FAM160B1
nxp:NX_Q5W0V3-1	3	0.000254017168710381	Protein FAM160B1 isoform Iso 1 \Gname=FAM160B1
nxp:NX_Q9NW15-4	3	0.000223955300359147	Anoctamin-10 isoform Iso 4 \Gname=ANO10
nxp:NX_Q16512-1	3	0.000207699068371401	Serine/threonine-protein kinase N1 isoform Iso 1 \Gname=PKN1
nxp:NX_Q16512-2	3	0.000206384517305759	Serine/threonine-protein kinase N1 isoform Iso 2 \Gname=PKN1
nxp:NX_Q9H845-1	3	0.000205670777879651	Acyl-CoA dehydrogenase family member 9, mitochondrial isoform Iso 1 \Gname=ACAD9
nxp:NX_O43312-2	3	0.000196068993495222	Metastasis suppressor protein 1 isoform Iso 2 \Gname=MTSS1
nxp:NX_Q03431-1	3	0.000190148469490546	Parathyroid hormone/parathyroid hormone-related peptide receptor isoform Iso 1 \Gname=PTH1R
nxp:NX_O00461-1	3	0.000139021219882458	Golgi integral membrane protein 4 isoform Iso 1 \Gname=GOLIM4
nxp:NX_Q9P2E9-3	3	0.000134019023645471	Ribosome-binding protein 1 isoform Iso 2 \Gname=RRBP1
nxp:NX_Q9Y2J2-2	3	0.000113232638107429	Band 4.1-like protein 3 isoform C \Gname=EPB41L3
nxp:NX_Q96MK2-1	3	0.000107902024422157	Protein FAM65C isoform Iso 2 \Gname=FAM65C
nxp:NX_Q9P2E9-2	3	0.0000930608287858031	Ribosome-binding protein 1 isoform Iso 1 \Gname=RRBP1
nxp:NX_Q9P2E9-1	3	0.0000928628270224291	Ribosome-binding protein 1 isoform Iso 3 \Gname=RRBP1
nxp:NX_P07814-1	3	0.0000925321158304807	Bifunctional glutamate/proline--tRNA ligase isoform Iso 1 \Gname=EPRS
nxp:NX_Q9Y2J2-1	3	0.0000901069291287266	Band 4.1-like protein 3 isoform A \Gname=EPB41L3
nxp:NX_P05109-1	2	0.00233244998680086	Protein S100-A8 isoform Iso 1 \Gname=S100A8
nxp:NX_P01861-1	2	0.00142476829097627	Ig gamma-4 chain C region isoform Iso 1 \Gname=IGHG4
nxp:NX_P62805-1	2	0.00119680906811489	Histone H4 isoform Iso 1 \Gname=HIST1H4A;HIST1H4B;HIST1H4C;HIST1H4D;HIST1H4E;HIST1H4F;HIST1H4H;HIST1H4I;HIST1H4J;HIST1H4K;HIST1H4L;HIST2H4A;HIST2H4B;HIST4H4
nxp:NX_P63218-1	2	0.00104762437391305	Guanine nucleotide-binding protein G(I)/G(S)/G(O) subunit gamma-5 isoform Iso 1 \Gname=GNG5
nxp:NX_P30536-1	2	0.000730351313476453	Translocator protein isoform Iso 1 \Gname=TSPO
nxp:NX_Q29718-1	2	0.000690140131696343	HLA class I histocompatibility antigen, B-82 alpha chain isoform Iso 1 \Gname=HLA-B
nxp:NX_O14561-1	2	0.000676745291534825	Acyl carrier protein, mitochondrial isoform Iso 1 \Gname=NDUFAB1
nxp:NX_Q01628-1	2	0.000602252439092911	Interferon-induced transmembrane protein 3 isoform Iso 1 \Gname=IFITM3
nxp:NX_Q13404-6	2	0.000594873582003984	Ubiquitin-conjugating enzyme E2 variant 1 isoform Iso 4 \Gname=UBE2V1
nxp:NX_Q9P289-2	2	0.000577788620012045	Serine/threonine-protein kinase MST4 isoform Iso 2 \Gname=MST4
nxp:NX_P20591-2	2	0.000553742836661349	Interferon-induced GTP-binding protein Mx1 isoform Iso 2 \Gname=MX1
nxp:NX_Q9Y3E0-1	2	0.000516220705986141	Vesicle transport protein GOT1B isoform Iso 1 \Gname=GOLT1B
nxp:NX_P10646-1	2	0.000509013121686392	Tissue factor pathway inhibitor isoform Alpha \Gname=TFPI
nxp:NX_Q9BX10-3	2	0.000494574871242956	GTP-binding protein 2 isoform Iso 3 \Gname=GTPBP2
nxp:NX_P51808-1	2	0.000455052868445831	Dynein light chain Tctex-type 3 isoform Iso 1 \Gname=DYNLT3
nxp:NX_Q9Y570-3	2	0.000452576690754834	Protein phosphatase methylesterase 1 isoform Iso 3 \Gname=PPME1
nxp:NX_Q13526-1	2	0.000403484822955277	Peptidyl-prolyl cis-trans isomerase NIMA-interacting 1 isoform Iso 1 \Gname=PIN1
nxp:NX_Q9Y3C5-1	2	0.000397869993158509	RING finger protein 11 isoform Iso 1 \Gname=RNF11
nxp:NX_Q96FW1-2	2	0.000396597061871147	Ubiquitin thioesterase OTUB1 isoform Iso 2 \Gname=OTUB1
nxp:NX_P12429-1	2	0.000379393058491705	Annexin A3 isoform Iso 1 \Gname=ANXA3
nxp:NX_Q9H0T7-1	2	0.000376943463545696	Ras-related protein Rab-17 isoform Iso 1 \Gname=RAB17
nxp:NX_Q9UM00-2	2	0.000366781805706253	Transmembrane and coiled-coil domain-containing protein 1 isoform Iso 2 \Gname=TMCO1
nxp:NX_Q13126-7	2	0.000354941477755184	S-methyl-5'-thioadenosine phosphorylase isoform Iso 7 \Gname=MTAP
nxp:NX_Q9UM00-1	2	0.000329713431725301	Transmembrane and coiled-coil domain-containing protein 1 isoform Iso 1 \Gname=TMCO1
nxp:NX_O00505-1	2	0.000319456397286823	Importin subunit alpha-4 isoform Iso 1 \Gname=KPNA3
nxp:NX_Q99653-1	2	0.000319123216789494	Calcineurin B homologous protein 1 isoform Iso 1 \Gname=CHP1
nxp:NX_O95831-4	2	0.000302655592543001	Apoptosis-inducing factor 1, mitochondrial isoform Iso 6 \Gname=AIFM1
nxp:NX_P49448-1	2	0.000297960417389024	Glutamate dehydrogenase 2, mitochondrial isoform Iso 1 \Gname=GLUD2
nxp:NX_Q13126-6	2	0.000289525642264467	S-methyl-5'-thioadenosine phosphorylase isoform Iso 6 \Gname=MTAP
nxp:NX_Q9Y6K5-1	2	0.000284070495198209	2'-5'-oligoadenylate synthase 3 isoform Iso 1 \Gname=OAS3
nxp:NX_Q8NB37-1	2	0.000278508995210956	Parkinson disease 7 domain-containing protein 1 isoform Iso 1 \Gname=PDDC1
nxp:NX_Q13126-5	2	0.000278134469454062	S-methyl-5'-thioadenosine phosphorylase isoform Iso 5 \Gname=MTAP
nxp:NX_A9UHW6-1	2	0.000277638139675301	MIF4G domain-containing protein isoform Iso 1 \Gname=MIF4GD
nxp:NX_Q6NUK1-2	2	0.00027418307814259	Calcium-binding mitochondrial carrier protein SCaMC-1 isoform Iso 2 \Gname=SLC25A24
nxp:NX_Q6NUK1-1	2	0.000263261739600222	Calcium-binding mitochondrial carrier protein SCaMC-1 isoform Iso 1 \Gname=SLC25A24
nxp:NX_Q8NB37-2	2	0.000245087915785642	Parkinson disease 7 domain-containing protein 1 isoform Iso 2 \Gname=PDDC1
nxp:NX_P49841-1	2	0.000238598878969319	Glycogen synthase kinase-3 beta isoform Iso 1 \Gname=GSK3B
nxp:NX_P49841-2	2	0.000231435402233519	Glycogen synthase kinase-3 beta isoform Iso 2 \Gname=GSK3B
nxp:NX_P25685-1	2	0.000226817627122669	DnaJ homolog subfamily B member 1 isoform Iso 1 \Gname=DNAJB1
nxp:NX_P30038-1	2	0.000221062263850626	Delta-1-pyrroline-5-carboxylate dehydrogenase, mitochondrial isoform Iso 2 \Gname=ALDH4A1
nxp:NX_Q13867-1	2	0.000214969116354437	Bleomycin hydrolase isoform Iso 1 \Gname=BLMH
nxp:NX_Q8NFI4-1	2	0.000211789846509237	Putative protein FAM10A5 isoform Iso 1 \Gname=ST13P5
nxp:NX_Q9Y6Q5-1	2	0.000207572160488967	AP-1 complex subunit mu-2 isoform Iso 1 \Gname=AP1M2
nxp:NX_Q9Y6Q5-2	2	0.000206595350321961	AP-1 complex subunit mu-2 isoform Iso 2 \Gname=AP1M2
nxp:NX_P46734-1	2	0.000189533216546715	Dual specificity mitogen-activated protein kinase kinase 3 isoform Iso 1 \Gname=MAP2K3
nxp:NX_Q9Y570-1	2	0.000188769034226757	Protein phosphatase methylesterase 1 isoform Iso 2 \Gname=PPME1
nxp:NX_P46734-3	2	0.000186840983357131	Dual specificity mitogen-activated protein kinase kinase 3 isoform Iso 2 \Gname=MAP2K3
nxp:NX_O00170-1	2	0.000186774748508839	AH receptor-interacting protein isoform Iso 1 \Gname=AIP
nxp:NX_Q13057-2	2	0.000163759236415902	Bifunctional coenzyme A synthase isoform Iso 1 \Gname=COASY
nxp:NX_O94826-1	2	0.000161684700650755	Mitochondrial import receptor subunit TOM70 isoform Iso 1 \Gname=TOMM70A
nxp:NX_Q9BUM1-1	2	0.000152561077282417	Glucose-6-phosphatase 3 isoform Iso 1 \Gname=G6PC3
nxp:NX_Q9UHL4-1	2	0.000134720258997767	Dipeptidyl peptidase 2 isoform Iso 1 \Gname=DPP7
nxp:NX_O14744-2	2	0.000129192861934447	Protein arginine N-methyltransferase 5 isoform Iso 2 \Gname=PRMT5
nxp:NX_O14744-1	2	0.000125745014755663	Protein arginine N-methyltransferase 5 isoform Iso 1 \Gname=PRMT5
nxp:NX_A6NHC0-1	2	0.000119954244840321	Calpain-8 isoform Iso 1 \Gname=CAPN8
nxp:NX_P02786-1	2	0.000115062149107749	Transferrin receptor protein 1 isoform Iso 1 \Gname=TFRC
nxp:NX_Q9UEW8-1	2	0.000113092966987004	STE20/SPS1-related proline-alanine-rich protein kinase isoform Iso 1 \Gname=STK39
nxp:NX_Q10472-1	2	0.000109547001625065	Polypeptide N-acetylgalactosaminyltransferase 1 isoform Iso 2 \Gname=GALNT1
nxp:NX_Q13507-2	2	0.00010171399436208	Short transient receptor potential channel 3 isoform Iso 1 \Gname=TRPC3
nxp:NX_Q9NZB2-2	2	0.0000981459665731161	Constitutive coactivator of PPAR-gamma-like protein 1 isoform B \Gname=FAM120A
nxp:NX_Q9NZB2-5	2	0.0000946784439445728	Constitutive coactivator of PPAR-gamma-like protein 1 isoform E \Gname=FAM120A
nxp:NX_O60271-5	2	0.0000855522619482271	C-Jun-amino-terminal kinase-interacting protein 4 isoform Iso 5 \Gname=SPAG9
nxp:NX_O60271-3	2	0.0000842848210304756	C-Jun-amino-terminal kinase-interacting protein 4 isoform Iso 3 \Gname=SPAG9
nxp:NX_O60271-9	2	0.0000676713303940522	C-Jun-amino-terminal kinase-interacting protein 4 isoform Iso 6 \Gname=SPAG9
nxp:NX_Q93050-1	2	0.0000637505355141042	V-type proton ATPase 116 kDa subunit a isoform 1 isoform Iso 2 \Gname=ATP6V0A1
nxp:NX_Q93050-2	2	0.0000632935424279816	V-type proton ATPase 116 kDa subunit a isoform 1 isoform Iso 1 \Gname=ATP6V0A1
nxp:NX_Q93050-3	2	0.0000632180131410747	V-type proton ATPase 116 kDa subunit a isoform 1 isoform Iso 3 \Gname=ATP6V0A1
nxp:NX_O60271-4	2	0.0000609404406073446	C-Jun-amino-terminal kinase-interacting protein 4 isoform Iso 4 \Gname=SPAG9
nxp:NX_Q9Y487-1	2	0.0000607906325744989	V-type proton ATPase 116 kDa subunit a isoform 2 isoform Iso 1 \Gname=ATP6V0A2
nxp:NX_O60271-2	2	0.0000607545048617844	C-Jun-amino-terminal kinase-interacting protein 4 isoform Iso 2 \Gname=SPAG9
nxp:NX_Q96BY6-1	2	0.0000604149414009966	Dedicator of cytokinesis protein 10 isoform Iso 1 \Gname=DOCK10
nxp:NX_O60271-1	2	0.0000602945918802418	C-Jun-amino-terminal kinase-interacting protein 4 isoform Iso 1 \Gname=SPAG9
nxp:NX_Q9NZB2-4	2	0.0000574959580297732	Constitutive coactivator of PPAR-gamma-like protein 1 isoform D \Gname=FAM120A
nxp:NX_Q9NZB2-1	2	0.0000551302924936645	Constitutive coactivator of PPAR-gamma-like protein 1 isoform A \Gname=FAM120A
nxp:NX_Q9NZB2-6	2	0.0000537833045444301	Constitutive coactivator of PPAR-gamma-like protein 1 isoform F \Gname=FAM120A
nxp:NX_Q8NEV4-1	2	0.0000535661866039752	Myosin-IIIa isoform Iso 1 \Gname=MYO3A
nxp:NX_Q92974-2	2	0.0000528292197804782	Rho guanine nucleotide exchange factor 2 isoform Iso 3 \Gname=ARHGEF2
nxp:NX_Q92974-1	2	0.000052775640450072	Rho guanine nucleotide exchange factor 2 isoform Iso 1 \Gname=ARHGEF2
nxp:NX_Q9HCM2-1	2	0.0000513810454590195	Plexin-A4 isoform Iso 4 \Gname=PLXNA4
nxp:NX_Q9ULL4-1	2	0.0000490720737598089	Plexin-B3 isoform Iso 1 \Gname=PLXNB3
nxp:NX_Q9HD20-2	2	0.0000486060154141035	Probable cation-transporting ATPase 13A1 isoform C \Gname=ATP13A1
nxp:NX_Q9ULL4-2	2	0.0000484878824055255	Plexin-B3 isoform Iso 2 \Gname=PLXNB3
nxp:NX_Q9HD20-1	2	0.0000438423029399638	Probable cation-transporting ATPase 13A1 isoform A \Gname=ATP13A1
nxp:NX_Q92608-1	2	0.0000355300798792879	Dedicator of cytokinesis protein 2 isoform Iso 1 \Gname=DOCK2
nxp:NX_P12814-2	1	0.00448812329363181	Alpha-actinin-1 isoform Iso 2 \Gname=ACTN1
nxp:NX_P04350-1	1	0.0032604138914426	Tubulin beta-4A chain isoform Iso 1 \Gname=TUBB4A
nxp:NX_P06753-3	1	0.00209964185244029	Tropomyosin alpha-3 chain isoform Iso 3 \Gname=TPM3
nxp:NX_P09493-1	1	0.00125289655183046	Tropomyosin alpha-1 chain isoform Iso 1 \Gname=TPM1
nxp:NX_P09493-6	1	0.00125289655183046	Tropomyosin alpha-1 chain isoform Iso 6 \Gname=TPM1
nxp:NX_P09493-7	1	0.00125289655183046	Tropomyosin alpha-1 chain isoform Iso 7 \Gname=TPM1
nxp:NX_P09493-9	1	0.00125289655183046	Tropomyosin alpha-1 chain isoform Iso 9 \Gname=TPM1
nxp:NX_P02100-1	1	0.00095573066749044	Hemoglobin subunit epsilon isoform Iso 1 \Gname=HBE1
nxp:NX_P07864-1	1	0.000883716940156997	L-lactate dehydrogenase C chain isoform Iso 1 \Gname=LDHC
nxp:NX_Q99439-2	1	0.00086882081274363	Calponin-2 isoform Iso 2 \Gname=CNN2
nxp:NX_P07205-1	1	0.00078662134917782	Phosphoglycerate kinase 2 isoform Iso 1 \Gname=PGK2
nxp:NX_P18465-1	1	0.000716647976605063	HLA class I histocompatibility antigen, B-57 alpha chain isoform Iso 1 \Gname=HLA-B
nxp:NX_Q0ZGT2-3	1	0.000708461876574477	Nexilin isoform Iso 3 \Gname=NEXN
nxp:NX_P30512-1	1	0.000602864433148198	HLA class I histocompatibility antigen, A-29 alpha chain isoform Iso 1 \Gname=HLA-A
nxp:NX_P51659-3	1	0.000541977508769567	Peroxisomal multifunctional enzyme type 2 isoform Iso 3 \Gname=HSD17B4
nxp:NX_P51659-2	1	0.000511353286854861	Peroxisomal multifunctional enzyme type 2 isoform Iso 2 \Gname=HSD17B4
nxp:NX_Q14247-2	1	0.000503384166515654	Src substrate cortactin isoform Iso 2 \Gname=CTTN
nxp:NX_P09972-1	1	0.000496090046645794	Fructose-bisphosphate aldolase C isoform Iso 1 \Gname=ALDOC
nxp:NX_Q16799-3	1	0.000366338658621634	Reticulon-1 isoform RTN1-C \Gname=RTN1
nxp:NX_Q9Y5J7-1	1	0.000353580392998084	Mitochondrial import inner membrane translocase subunit Tim9 isoform Iso 1 \Gname=TIMM9
nxp:NX_Q14696-1	1	0.000350449895947811	LDLR chaperone MESD isoform Iso 1 \Gname=MESDC2
nxp:NX_Q15005-1	1	0.000346641662099171	Signal peptidase complex subunit 2 isoform Iso 1 \Gname=SPCS2
nxp:NX_Q86SZ2-1	1	0.00032814062791941	Trafficking protein particle complex subunit 6B isoform Iso 1 \Gname=TRAPPC6B
nxp:NX_Q9UL46-1	1	0.00032539468124226	Proteasome activator complex subunit 2 isoform Iso 1 \Gname=PSME2
nxp:NX_Q58FF6-1	1	0.00031026144805708	Putative heat shock protein HSP 90-beta 4 isoform Iso 1 \Gname=HSP90AB4P
nxp:NX_Q9UMX5-1	1	0.000303647347420204	Neudesin isoform Iso 1 \Gname=NENF
nxp:NX_P19652-1	1	0.000300169273941168	Alpha-1-acid glycoprotein 2 isoform Iso 1 \Gname=ORM2
nxp:NX_P51153-1	1	0.00029721194119298	Ras-related protein Rab-13 isoform Iso 1 \Gname=RAB13
nxp:NX_Q8NG11-3	1	0.000294134430307293	Tetraspanin-14 isoform Iso 3 \Gname=TSPAN14
nxp:NX_P35749-4	1	0.000275549644819061	Myosin-11 isoform Iso 4 \Gname=MYH11
nxp:NX_P35749-3	1	0.00027455794943925	Myosin-11 isoform Iso 3 \Gname=MYH11
nxp:NX_Q15121-1	1	0.000273853954697098	Astrocytic phosphoprotein PEA-15 isoform Iso 1 \Gname=PEA15
nxp:NX_P35749-1	1	0.000270798788873905	Myosin-11 isoform Iso 1 \Gname=MYH11
nxp:NX_P35749-2	1	0.000269840935654038	Myosin-11 isoform Iso 2 \Gname=MYH11
nxp:NX_P02652-1	1	0.00026863023134083	Apolipoprotein A-II isoform Iso 1 \Gname=APOA2
nxp:NX_Q8WU03-1	1	0.000265965554921519	Glycine N-acyltransferase-like protein 2 isoform Iso 1 \Gname=GLYATL2
nxp:NX_Q96FN4-1	1	0.000259861416865859	Copine-2 isoform Iso 1 \Gname=CPNE2
nxp:NX_Q9P289-3	1	0.000255652644331249	Serine/threonine-protein kinase MST4 isoform Iso 3 \Gname=MST4
nxp:NX_Q08722-3	1	0.00025498140595705	Leukocyte surface antigen CD47 isoform OA3-293 \Gname=CD47
nxp:NX_Q6ZRY4-1	1	0.000248068034503669	RNA-binding protein with multiple splicing 2 isoform Iso 1 \Gname=RBPMS2
nxp:NX_Q9Y5K6-1	1	0.000243387847537738	CD2-associated protein isoform Iso 1 \Gname=CD2AP
nxp:NX_Q08722-1	1	0.000240771915841796	Leukocyte surface antigen CD47 isoform OA3-312 \Gname=CD47
nxp:NX_P02810-1	1	0.000240320452990154	Salivary acidic proline-rich phosphoprotein 1/2 isoform Iso 1 \Gname=PRH1;PRH2
nxp:NX_Q9BTW9-3	1	0.000232603324703799	Tubulin-specific chaperone D isoform Iso 3 \Gname=TBCD
nxp:NX_Q68EM7-4	1	0.000231094441399448	Rho GTPase-activating protein 17 isoform Iso 4 \Gname=ARHGAP17
nxp:NX_P00739-1	1	0.000223475082807185	Haptoglobin-related protein isoform Iso 1 \Gname=HPR
nxp:NX_Q9H9B4-1	1	0.000218155913231513	Sideroflexin-1 isoform Iso 1 \Gname=SFXN1
nxp:NX_P51665-1	1	0.000216809271791813	26S proteasome non-ATPase regulatory subunit 7 isoform Iso 1 \Gname=PSMD7
nxp:NX_P52788-1	1	0.000214046490804406	Spermine synthase isoform Iso 1 \Gname=SMS
nxp:NX_O75410-5	1	0.000213463257859435	Transforming acidic coiled-coil-containing protein 1 isoform Iso 8 \Gname=TACC1
nxp:NX_P46782-1	1	0.000212378413219862	40S ribosomal protein S5 isoform Iso 1 \Gname=RPS5
nxp:NX_P57721-2	1	0.000209800546058046	Poly(rC)-binding protein 3 isoform Iso 2 \Gname=PCBP3
nxp:NX_P57721-3	1	0.00020919418609834	Poly(rC)-binding protein 3 isoform Iso 3 \Gname=PCBP3
nxp:NX_O75410-4	1	0.000206704526739875	Transforming acidic coiled-coil-containing protein 1 isoform Iso 4 \Gname=TACC1
nxp:NX_P57721-5	1	0.000206214211937395	Poly(rC)-binding protein 3 isoform Iso 5 \Gname=PCBP3
nxp:NX_Q969M7-3	1	0.000203300437355052	NEDD8-conjugating enzyme UBE2F isoform Iso 3 \Gname=UBE2F
nxp:NX_P43686-2	1	0.000202431564946803	26S protease regulatory subunit 6B isoform Iso 2 \Gname=PSMC4
nxp:NX_P00739-2	1	0.000201998256667273	Haptoglobin-related protein isoform Iso 2 \Gname=HPR
nxp:NX_Q16644-1	1	0.000199472358621204	MAP kinase-activated protein kinase 3 isoform Iso 1 \Gname=MAPKAPK3
nxp:NX_O75410-6	1	0.000198331685150412	Transforming acidic coiled-coil-containing protein 1 isoform Iso 6 \Gname=TACC1
nxp:NX_P57721-4	1	0.000195624833486556	Poly(rC)-binding protein 3 isoform Iso 4 \Gname=PCBP3
nxp:NX_P57721-1	1	0.000195097542830258	Poly(rC)-binding protein 3 isoform Iso 1 \Gname=PCBP3
nxp:NX_Q7L591-4	1	0.000195078191184129	Docking protein 3 isoform Iso 4 \Gname=DOK3
nxp:NX_P31995-2	1	0.000194659587928138	Low affinity immunoglobulin gamma Fc region receptor II-c isoform IIC2 \Gname=FCGR2C
nxp:NX_Q9UBI1-1	1	0.000182569303131398	COMM domain-containing protein 3 isoform Iso 1 \Gname=COMMD3
nxp:NX_Q13217-1	1	0.000179565547804092	DnaJ homolog subfamily C member 3 isoform Iso 1 \Gname=DNAJC3
nxp:NX_P13473-1	1	0.000176172465345433	Lysosome-associated membrane glycoprotein 2 isoform LAMP-2A \Gname=LAMP2
nxp:NX_P13473-2	1	0.000176172465345433	Lysosome-associated membrane glycoprotein 2 isoform LAMP-2B \Gname=LAMP2
nxp:NX_P13473-3	1	0.000175743821877439	Lysosome-associated membrane glycoprotein 2 isoform LAMP-2C \Gname=LAMP2
nxp:NX_Q96GS4-1	1	0.000174257517732902	Uncharacterized protein C17orf59 isoform Iso 1 \Gname=C17orf59
nxp:NX_A1A4Y4-1	1	0.000173859972247677	Immunity-related GTPase family M protein isoform Iso 1 \Gname=IRGM
nxp:NX_P05198-1	1	0.000170558877041797	Eukaryotic translation initiation factor 2 subunit 1 isoform Iso 1 \Gname=EIF2S1
nxp:NX_Q9Y4H4-1	1	0.000167893894588019	G-protein-signaling modulator 3 isoform Iso 1 \Gname=GPSM3
nxp:NX_P28676-1	1	0.000166430209197299	Grancalcin isoform Iso 1 \Gname=GCA
nxp:NX_O60636-1	1	0.000163417897718614	Tetraspanin-2 isoform Iso 1 \Gname=TSPAN2
nxp:NX_Q4G0F5-1	1	0.000159898947226684	Vacuolar protein sorting-associated protein 26B isoform Iso 1 \Gname=VPS26B
nxp:NX_Q8NBN7-1	1	0.000157786537028022	Retinol dehydrogenase 13 isoform Iso 2 \Gname=RDH13
nxp:NX_Q15771-1	1	0.000155018004811968	Ras-related protein Rab-30 isoform Iso 1 \Gname=RAB30
nxp:NX_O75822-1	1	0.000154624787582812	Eukaryotic translation initiation factor 3 subunit J isoform Iso 1 \Gname=EIF3J
nxp:NX_Q14BN4-6	1	0.000154533346140171	Sarcolemmal membrane-associated protein isoform Iso 6 \Gname=SLMAP
nxp:NX_P49189-1	1	0.000154247856261741	4-trimethylaminobutyraldehyde dehydrogenase isoform Iso 1 \Gname=ALDH9A1
nxp:NX_Q02218-3	1	0.000141297480239285	2-oxoglutarate dehydrogenase, mitochondrial isoform Iso 3 \Gname=OGDH
nxp:NX_Q658P3-4	1	0.000138020416565042	Metalloreductase STEAP3 isoform Iso 4 \Gname=STEAP3
nxp:NX_Q9UK41-1	1	0.000136502316882749	Vacuolar protein sorting-associated protein 28 homolog isoform Iso 1 \Gname=VPS28
nxp:NX_Q7L591-3	1	0.000134781295727216	Docking protein 3 isoform Iso 2 \Gname=DOK3
nxp:NX_Q9H488-2	1	0.000133624276317698	GDP-fucose protein O-fucosyltransferase 1 isoform Iso 2 \Gname=POFUT1
nxp:NX_Q13098-6	1	0.000131841873205876	COP9 signalosome complex subunit 1 isoform Iso 3 \Gname=GPS1
nxp:NX_Q9UK41-2	1	0.00012947215463986	Vacuolar protein sorting-associated protein 28 homolog isoform Iso 2 \Gname=VPS28
nxp:NX_Q14192-1	1	0.000129445718264566	Four and a half LIM domains protein 2 isoform Iso 1 \Gname=FHL2
nxp:NX_Q658P3-3	1	0.000129234722697452	Metalloreductase STEAP3 isoform Iso 3 \Gname=STEAP3
nxp:NX_Q96FZ7-1	1	0.00012897069455539	Charged multivesicular body protein 6 isoform Iso 1 \Gname=CHMP6
nxp:NX_Q658P3-2	1	0.000126380140469195	Metalloreductase STEAP3 isoform Iso 1 \Gname=STEAP3
nxp:NX_Q13907-2	1	0.000125355683488108	Isopentenyl-diphosphate Delta-isomerase 1 isoform Iso 1 \Gname=IDI1
nxp:NX_O43765-1	1	0.000115384522031354	Small glutamine-rich tetratricopeptide repeat-containing protein alpha isoform Iso 1 \Gname=SGTA
nxp:NX_Q9GZS3-1	1	0.000115157711574668	WD repeat-containing protein 61 isoform Iso 1 \Gname=WDR61
nxp:NX_Q9NWZ3-1	1	0.000113537703817989	Interleukin-1 receptor-associated kinase 4 isoform Iso 2 \Gname=IRAK4
nxp:NX_Q02818-1	1	0.00011329141812641	Nucleobindin-1 isoform Iso 1 \Gname=NUCB1
nxp:NX_Q9UBW8-1	1	0.000109698225567591	COP9 signalosome complex subunit 7a isoform Iso 1 \Gname=COPS7A
nxp:NX_Q9H9S4-1	1	0.000108825676606871	Calcium-binding protein 39-like isoform Iso 1 \Gname=CAB39L
nxp:NX_Q6YHK3-3	1	0.000108617610212974	CD109 antigen isoform Iso 3 \Gname=CD109
nxp:NX_P31751-1	1	0.000107788397528621	RAC-beta serine/threonine-protein kinase isoform Iso 1 \Gname=AKT2
nxp:NX_Q15257-4	1	0.000107355914701379	Serine/threonine-protein phosphatase 2A activator isoform Iso 4 \Gname=PPP2R4
nxp:NX_O75410-7	1	0.00010716965203066	Transforming acidic coiled-coil-containing protein 1 isoform Iso 7 \Gname=TACC1
nxp:NX_Q9BW04-1	1	0.000104720981620065	Specifically androgen-regulated gene protein isoform Iso 2 \Gname=SARG
nxp:NX_P24752-1	1	0.000101464159945789	Acetyl-CoA acetyltransferase, mitochondrial isoform Iso 1 \Gname=ACAT1
nxp:NX_Q9NP79-1	1	0.000101319110473365	Vacuolar protein sorting-associated protein VTA1 homolog isoform Iso 1 \Gname=VTA1
nxp:NX_P07355-2	1	0.000101163460492476	Annexin A2 isoform Iso 1 \Gname=ANXA2
nxp:NX_Q13190-3	1	0.0000978040145248598	Syntaxin-5 isoform Iso 3 \Gname=STX5
nxp:NX_O75410-1	1	0.000097318031843991	Transforming acidic coiled-coil-containing protein 1 isoform Iso 3 \Gname=TACC1
nxp:NX_O75410-2	1	0.000095888636027433	Transforming acidic coiled-coil-containing protein 1 isoform Iso 2 \Gname=TACC1
nxp:NX_Q9H0B6-2	1	0.0000958299885436241	Kinesin light chain 2 isoform Iso 2 \Gname=KLC2
nxp:NX_Q15582-1	1	0.0000910833584636103	Transforming growth factor-beta-induced protein ig-h3 isoform Iso 1 \Gname=TGFBI
nxp:NX_P01042-3	1	0.0000910511869836898	Kininogen-1 isoform Iso 3 \Gname=KNG1
nxp:NX_Q13596-2	1	0.0000897213081529407	Sorting nexin-1 isoform 1A \Gname=SNX1
nxp:NX_P34949-2	1	0.0000859253229705053	Mannose-6-phosphate isomerase isoform Iso 2 \Gname=MPI
nxp:NX_O14662-2	1	0.000085900236441242	Syntaxin-16 isoform Iso 6 \Gname=STX16
nxp:NX_P60510-1	1	0.0000850608204499595	Serine/threonine-protein phosphatase 4 catalytic subunit isoform Iso 1 \Gname=PPP4C
nxp:NX_O14662-4	1	0.0000847846489549921	Syntaxin-16 isoform D \Gname=STX16
nxp:NX_Q8IYB5-3	1	0.0000841152592121913	Stromal membrane-associated protein 1 isoform Iso 3 \Gname=SMAP1
nxp:NX_Q9H0B6-1	1	0.000083966790604944	Kinesin light chain 2 isoform Iso 1 \Gname=KLC2
nxp:NX_P01042-2	1	0.0000833747403059079	Kininogen-1 isoform LMW \Gname=KNG1
nxp:NX_Q8IYB5-2	1	0.000083350575037535	Stromal membrane-associated protein 1 isoform Iso 2 \Gname=SMAP1
nxp:NX_Q9UHD1-2	1	0.0000828214364397234	Cysteine and histidine-rich domain-containing protein 1 isoform Iso 2 \Gname=CHORDC1
nxp:NX_Q14894-1	1	0.0000825576739032911	Thiomorpholine-carboxylate dehydrogenase isoform Iso 1 \Gname=CRYM
nxp:NX_O14662-5	1	0.0000813510027356311	Syntaxin-16 isoform E \Gname=STX16
nxp:NX_Q6NVY1-1	1	0.0000805828158428055	3-hydroxyisobutyryl-CoA hydrolase, mitochondrial isoform Iso 1 \Gname=HIBCH
nxp:NX_O14662-1	1	0.0000803497596250387	Syntaxin-16 isoform B \Gname=STX16
nxp:NX_P01871-1	1	0.0000799012287518004	Ig mu chain C region isoform Iso 1 \Gname=IGHM
nxp:NX_Q9BQS8-3	1	0.0000795963378128956	FYVE and coiled-coil domain-containing protein 1 isoform Iso 3 \Gname=FYCO1
nxp:NX_Q9BQS8-2	1	0.0000793868737660195	FYVE and coiled-coil domain-containing protein 1 isoform Iso 2 \Gname=FYCO1
nxp:NX_Q13596-1	1	0.0000785491146089921	Sorting nexin-1 isoform Iso 1 \Gname=SNX1
nxp:NX_Q8IYB5-1	1	0.0000785315910417888	Stromal membrane-associated protein 1 isoform Iso 1 \Gname=SMAP1
nxp:NX_Q9UHD1-1	1	0.0000780816554386549	Cysteine and histidine-rich domain-containing protein 1 isoform Iso 1 \Gname=CHORDC1
nxp:NX_P01871-2	1	0.0000763538169044689	Ig mu chain C region isoform Iso 2 \Gname=IGHM
nxp:NX_P08559-3	1	0.0000748273624904819	Pyruvate dehydrogenase E1 component subunit alpha, somatic form, mitochondrial isoform Iso 3 \Gname=PDHA1
nxp:NX_P61073-1	1	0.0000736451977432767	C-X-C chemokine receptor type 4 isoform Iso 1 \Gname=CXCR4
nxp:NX_Q13190-1	1	0.0000735596390933453	Syntaxin-5 isoform Iso 2 \Gname=STX5
nxp:NX_Q15375-2	1	0.000072891428388747	Ephrin type-A receptor 7 isoform Iso 2 \Gname=EPHA7
nxp:NX_Q15375-4	1	0.0000728180969718569	Ephrin type-A receptor 7 isoform Iso 4 \Gname=EPHA7
nxp:NX_P61073-2	1	0.0000728177236113298	C-X-C chemokine receptor type 4 isoform Iso 2 \Gname=CXCR4
nxp:NX_Q15375-1	1	0.0000725262408717693	Ephrin type-A receptor 7 isoform Iso 1 \Gname=EPHA7
nxp:NX_Q08426-1	1	0.0000717098467652377	Peroxisomal bifunctional enzyme isoform Iso 2 \Gname=EHHADH
nxp:NX_Q9H488-1	1	0.000066812138158849	GDP-fucose protein O-fucosyltransferase 1 isoform Iso 1 \Gname=POFUT1
nxp:NX_Q68EM7-2	1	0.0000650402786504049	Rho GTPase-activating protein 17 isoform Iso 2 \Gname=ARHGAP17
nxp:NX_Q12805-3	1	0.0000639606808472144	EGF-containing fibulin-like extracellular matrix protein 1 isoform Iso 3 \Gname=EFEMP1
nxp:NX_Q12805-4	1	0.0000639606808472144	EGF-containing fibulin-like extracellular matrix protein 1 isoform Iso 4 \Gname=EFEMP1
nxp:NX_P15907-1	1	0.0000638500236591956	Beta-galactoside alpha-2,6-sialyltransferase 1 isoform Iso 1 \Gname=ST6GAL1
nxp:NX_Q12805-1	1	0.0000638309431578691	EGF-containing fibulin-like extracellular matrix protein 1 isoform Iso 2 \Gname=EFEMP1
nxp:NX_Q68EM7-6	1	0.0000621754092336609	Rho GTPase-activating protein 17 isoform Iso 6 \Gname=ARHGAP17
nxp:NX_P49257-1	1	0.0000617032450526068	Protein ERGIC-53 isoform Iso 1 \Gname=LMAN1
nxp:NX_Q9NS87-4	1	0.0000603679636280448	Kinesin-like protein KIF15 isoform Iso 4 \Gname=KIF15
nxp:NX_Q6PGP7-1	1	0.0000603618701601588	Tetratricopeptide repeat protein 37 isoform Iso 1 \Gname=TTC37
nxp:NX_Q68EM7-5	1	0.0000602391508146196	Rho GTPase-activating protein 17 isoform Iso 5 \Gname=ARHGAP17
nxp:NX_Q8N6G6-4	1	0.0000600331446938417	ADAMTS-like protein 1 isoform Iso 1 \Gname=ADAMTSL1
nxp:NX_Q68EM7-1	1	0.0000592818884861239	Rho GTPase-activating protein 17 isoform Iso 3 \Gname=ARHGAP17
nxp:NX_Q93099-1	1	0.0000586824087149159	Homogentisate 1,2-dioxygenase isoform Iso 1 \Gname=HGD
nxp:NX_P08603-1	1	0.0000570643412352131	Complement factor H isoform Iso 1 \Gname=CFH
nxp:NX_Q96K76-2	1	0.0000562402396192896	Ubiquitin carboxyl-terminal hydrolase 47 isoform Iso 3 \Gname=USP47
nxp:NX_P01042-1	1	0.0000552810778115259	Kininogen-1 isoform HMW \Gname=KNG1
nxp:NX_P13807-2	1	0.0000544936894747628	Glycogen [starch] synthase, muscle isoform Iso 2 \Gname=GYS1
nxp:NX_Q96K76-1	1	0.0000526408642836551	Ubiquitin carboxyl-terminal hydrolase 47 isoform Iso 1 \Gname=USP47
nxp:NX_Q9NS87-1	1	0.0000521478302521799	Kinesin-like protein KIF15 isoform Iso 3 \Gname=KIF15
nxp:NX_O94855-1	1	0.000052060122352874	Protein transport protein Sec24D isoform Iso 1 \Gname=SEC24D
nxp:NX_Q9NUY8-2	1	0.0000520482662436004	TBC1 domain family member 23 isoform Iso 2 \Gname=TBC1D23
nxp:NX_O94855-2	1	0.0000520097253322033	Protein transport protein Sec24D isoform Iso 2 \Gname=SEC24D
nxp:NX_P30622-2	1	0.0000511508823428487	CAP-Gly domain-containing linker protein 1 isoform Iso 3 \Gname=CLIP1
nxp:NX_Q9NUY8-1	1	0.0000509313506589738	TBC1 domain family member 23 isoform Iso 1 \Gname=TBC1D23
nxp:NX_Q9NR96-4	1	0.0000508769377539451	Toll-like receptor 9 isoform Iso 4 \Gname=TLR9
nxp:NX_Q9NZQ3-5	1	0.0000506157919984688	NCK-interacting protein with SH3 domain isoform Iso 5 \Gname=NCKIPSD
nxp:NX_Q9Y6F6-8	1	0.0000504263655957828	Protein MRVI1 isoform Iso 8 \Gname=MRVI1
nxp:NX_P30622-1	1	0.000049896305691132	CAP-Gly domain-containing linker protein 1 isoform Iso 2 \Gname=CLIP1
nxp:NX_P13807-1	1	0.0000497615373358418	Glycogen [starch] synthase, muscle isoform Iso 1 \Gname=GYS1
nxp:NX_Q06481-5	1	0.0000496611295127077	Amyloid-like protein 2 isoform Iso 5 \Gname=APLP2
nxp:NX_P30622-3	1	0.000049514623241478	CAP-Gly domain-containing linker protein 1 isoform Iso 1 \Gname=CLIP1
nxp:NX_Q92854-2	1	0.0000482398565184589	Semaphorin-4D isoform Iso 2 \Gname=SEMA4D
nxp:NX_P32298-2	1	0.0000478272378720468	G protein-coupled receptor kinase 4 isoform Iso 2 \Gname=GRK4
nxp:NX_P02545-2	1	0.0000469633271574878	Prelamin-A/C isoform C \Gname=LMNA
nxp:NX_Q9BTW9-5	1	0.0000463977569752624	Tubulin-specific chaperone D isoform Iso 5 \Gname=TBCD
nxp:NX_P32298-1	1	0.0000451793631109647	G protein-coupled receptor kinase 4 isoform Iso 1 \Gname=GRK4
nxp:NX_P43250-1	1	0.0000450053986208913	G protein-coupled receptor kinase 6 isoform GRK6A \Gname=GRK6
nxp:NX_P52630-4	1	0.0000449813701259149	Signal transducer and activator of transcription 2 isoform Iso 2 \Gname=STAT2
nxp:NX_P52630-3	1	0.0000447699418292008	Signal transducer and activator of transcription 2 isoform Iso 1 \Gname=STAT2
nxp:NX_P43250-2	1	0.0000440120706377477	G protein-coupled receptor kinase 6 isoform GRK6C \Gname=GRK6
nxp:NX_Q8NFP9-1	1	0.0000439971310346799	Neurobeachin isoform Iso 3 \Gname=NBEA
nxp:NX_Q9Y2D4-1	1	0.0000438976746123584	Exocyst complex component 6B isoform Iso 1 \Gname=EXOC6B
nxp:NX_P25098-1	1	0.0000437837620189948	Beta-adrenergic receptor kinase 1 isoform Iso 1 \Gname=ADRBK1
nxp:NX_P61221-1	1	0.0000435954455394617	ATP-binding cassette sub-family E member 1 isoform Iso 1 \Gname=ABCE1
nxp:NX_Q7Z2W4-2	1	0.0000431573848799534	Zinc finger CCCH-type antiviral protein 1 isoform Iso 5 \Gname=ZC3HAV1
nxp:NX_P57737-2	1	0.0000429944707093021	Coronin-7 isoform Iso 2 \Gname=CORO7
nxp:NX_P02545-3	1	0.0000423706989496577	Prelamin-A/C isoform ADelta10 \Gname=LMNA
nxp:NX_Q92854-1	1	0.0000413004804067549	Semaphorin-4D isoform Iso 1 \Gname=SEMA4D
nxp:NX_P42680-1	1	0.0000410825825762812	Tyrosine-protein kinase Tec isoform Iso 1 \Gname=TEC
nxp:NX_P02545-1	1	0.0000404563601416913	Prelamin-A/C isoform A \Gname=LMNA
nxp:NX_P57737-4	1	0.000039818473424271	Coronin-7 isoform Iso 4 \Gname=CORO7
nxp:NX_Q9Y2K6-1	1	0.0000395958360995764	Ubiquitin carboxyl-terminal hydrolase 20 isoform Iso 1 \Gname=USP20
nxp:NX_P57737-1	1	0.0000390436274549338	Coronin-7 isoform Iso 1 \Gname=CORO7
nxp:NX_Q15075-1	1	0.0000380765742510035	Early endosome antigen 1 isoform Iso 1 \Gname=EEA1
nxp:NX_Q06481-4	1	0.0000372994382814869	Amyloid-like protein 2 isoform Iso 4 \Gname=APLP2
nxp:NX_Q06481-2	1	0.0000366663502201321	Amyloid-like protein 2 isoform Iso 2 \Gname=APLP2
nxp:NX_O95202-1	1	0.0000353364978053283	LETM1 and EF-hand domain-containing protein 1, mitochondrial isoform Iso 1 \Gname=LETM1
nxp:NX_Q06481-3	1	0.0000345181219782069	Amyloid-like protein 2 isoform Iso 3 \Gname=APLP2
nxp:NX_P57737-3	1	0.0000344612169807383	Coronin-7 isoform Iso 3 \Gname=CORO7
nxp:NX_Q06481-6	1	0.0000340645329903199	Amyloid-like protein 2 isoform Iso 6 \Gname=APLP2
nxp:NX_Q06481-1	1	0.0000339752419470949	Amyloid-like protein 2 isoform Iso 1 \Gname=APLP2
nxp:NX_Q7Z2W4-1	1	0.0000334445809657289	Zinc finger CCCH-type antiviral protein 1 isoform Iso 4 \Gname=ZC3HAV1
nxp:NX_P27987-1	1	0.0000328805147096437	Inositol-trisphosphate 3-kinase B isoform Iso 2 \Gname=ITPKB
nxp:NX_P13535-1	1	0.0000324921579523278	Myosin-8 isoform Iso 1 \Gname=MYH8
nxp:NX_Q9UKX3-1	1	0.0000324753921329509	Myosin-13 isoform Iso 1 \Gname=MYH13
nxp:NX_P12882-1	1	0.000032458643606838	Myosin-1 isoform Iso 1 \Gname=MYH1
nxp:NX_P13533-1	1	0.000032458643606838	Myosin-6 isoform Iso 1 \Gname=MYH6
nxp:NX_Q9Y623-1	1	0.000032458643606838	Myosin-4 isoform Iso 1 \Gname=MYH4
nxp:NX_A7E2Y1-1	1	0.0000324251983274904	Myosin-7B isoform Iso 2 \Gname=MYH7B
nxp:NX_Q9UKX2-1	1	0.0000324251983274904	Myosin-2 isoform Iso 1 \Gname=MYH2
nxp:NX_Q7Z3U7-2	1	0.0000309344983360781	Protein MON2 homolog isoform Iso 2 \Gname=MON2
nxp:NX_Q9NX02-4	1	0.0000303166232917432	NACHT, LRR and PYD domains-containing protein 2 isoform Iso 4 \Gname=NLRP2
nxp:NX_Q9NX02-5	1	0.0000302874446360245	NACHT, LRR and PYD domains-containing protein 2 isoform Iso 5 \Gname=NLRP2
nxp:NX_Q9NX02-2	1	0.0000302583220931053	NACHT, LRR and PYD domains-containing protein 2 isoform Iso 2 \Gname=NLRP2
nxp:NX_Q7Z3U7-4	1	0.0000301958178283441	Protein MON2 homolog isoform Iso 4 \Gname=MON2
nxp:NX_Q7Z3U7-1	1	0.000030178241682926	Protein MON2 homolog isoform Iso 1 \Gname=MON2
nxp:NX_Q00722-2	1	0.0000297401371975222	1-phosphatidylinositol 4,5-bisphosphate phosphodiesterase beta-2 isoform Iso 2 \Gname=PLCB2
nxp:NX_Q00722-1	1	0.0000296397485487541	1-phosphatidylinositol 4,5-bisphosphate phosphodiesterase beta-2 isoform Iso 1 \Gname=PLCB2
nxp:NX_Q9NX02-1	1	0.0000296315018614213	NACHT, LRR and PYD domains-containing protein 2 isoform Iso 3 \Gname=NLRP2
nxp:NX_Q9BTW9-1	1	0.0000294656896227128	Tubulin-specific chaperone D isoform Iso 2 \Gname=TBCD
nxp:NX_Q9BTW9-4	1	0.0000281435112422065	Tubulin-specific chaperone D isoform Iso 4 \Gname=TBCD
nxp:NX_P14735-1	1	0.0000263621424279519	Insulin-degrading enzyme isoform Iso 2 \Gname=IDE
nxp:NX_P35573-2	1	0.0000238385184130784	Glycogen debranching enzyme isoform Iso 5 \Gname=AGL
nxp:NX_P35573-3	1	0.0000238227937967109	Glycogen debranching enzyme isoform Iso 6 \Gname=AGL
nxp:NX_P35573-1	1	0.0000235739917727244	Glycogen debranching enzyme isoform Iso 1 \Gname=AGL
nxp:NX_Q8N6G6-3	1	0.0000232705095493155	ADAMTS-like protein 1 isoform Iso 3 \Gname=ADAMTSL1
nxp:NX_P04920-2	1	0.0000218932543880057	Anion exchange protein 2 isoform B1 \Gname=SLC4A2
nxp:NX_P04920-3	1	0.0000218044018945479	Anion exchange protein 2 isoform Iso 3 \Gname=SLC4A2
nxp:NX_P04920-1	1	0.0000216462716632417	Anion exchange protein 2 isoform A \Gname=SLC4A2
nxp:NX_Q6ZS81-5	1	0.0000213047718598102	WD repeat- and FYVE domain-containing protein 4 isoform Iso 5 \Gname=WDFY4
nxp:NX_Q9BQS8-1	1	0.0000204106982618995	FYVE and coiled-coil domain-containing protein 1 isoform Iso 1 \Gname=FYCO1
nxp:NX_Q6ZS81-4	1	0.0000195875106519666	WD repeat- and FYVE domain-containing protein 4 isoform Iso 4 \Gname=WDFY4
nxp:NX_Q6ZS81-1	1	0.0000195382958010822	WD repeat- and FYVE domain-containing protein 4 isoform Iso 1 \Gname=WDFY4
nxp:NX_Q5VYK3-1	1	0.0000192959426073836	Proteasome-associated protein ECM29 homolog isoform Iso 1 \Gname=ECM29
nxp:NX_Q14980-2	1	0.0000174556178089078	Nuclear mitotic apparatus protein 1 isoform Iso 2 \Gname=NUMA1
nxp:NX_Q14980-1	1	0.0000173400723482342	Nuclear mitotic apparatus protein 1 isoform Iso 1 \Gname=NUMA1
nxp:NX_Q5D862-1	1	0.0000108419529927367	Filaggrin-2 isoform Iso 1 \Gname=FLG2

## Sheet: (C)DifferentiallyExpressProtein
Supplemental Table 2c: List of differentially expressed proteins detected in both biological conditions (Dengue and Control) with statistical significance (FDR < 0.05). These proteins represents the blue dots in volcano plot (Figure 1B).
Entry	Fold Change	pValue	Signal in CONTROL	Signal in DENGUE	Description
nxp:NX_P55036-2	2.29967	0.0168269	0.000357455949162913	0.00015543819811212	26S proteasome non-ATPase regulatory subunit 4 isoform Rpn10E \Gname=PSMD4
nxp:NX_Q00013-1	1.33138	0.00442386	0.000426833348065665	0.000320595050425775	55 kDa erythrocyte membrane protein isoform Iso 1 \Gname=MPP1
nxp:NX_Q00013-2	1.33138	0.00442386	0.000456202615134403	0.000342654342886264	55 kDa erythrocyte membrane protein isoform Iso 2 \Gname=MPP1
nxp:NX_Q00013-3	1.38573	0.00288633	0.000445973856947534	0.000321834206166168	55 kDa erythrocyte membrane protein isoform Iso 3 \Gname=MPP1
nxp:NX_P05386-1	1.31753	0.0038303	0.000424506439027624	0.000322197668020954	60S acidic ribosomal protein P1 isoform Iso 1 \Gname=RPLP1
nxp:NX_O95870-1	1.47039	0.00522926	0.00041516619686846	0.000282350881551415	Abhydrolase domain-containing protein 16A isoform Iso 1 \Gname=ABHD16A
nxp:NX_P01009-1	1.34652	0.00565499	0.000434130107964843	0.000322408690282836	Alpha-1-antitrypsin isoform Iso 1 \Gname=SERPINA1
nxp:NX_P01009-2	1.46886	0.0119252	0.00050240598371178	0.000342038949725556	Alpha-1-antitrypsin isoform Iso 3 \Gname=SERPINA1
nxp:NX_P61163-1	-1.31339	0.00788503	0.000270389775069436	0.000355127624319276	Alpha-centractin isoform Iso 1 \Gname=ACTR1A
nxp:NX_P54920-1	-1.2585	0.0106372	0.000719101505594647	0.000904989494797537	Alpha-soluble NSF attachment protein isoform Iso 1 \Gname=NAPA
nxp:NX_P27338-1	1.25889	0.0246294	0.000362122075277055	0.000287652392666343	Amine oxidase [flavin-containing] B isoform Iso 1 \Gname=MAOB
nxp:NX_P18054-1	-1.36983	0.00291584	0.000367316852044333	0.000503161800579533	Arachidonate 12-lipoxygenase, 12S-type isoform Iso 1 \Gname=ALOX12
nxp:NX_O75947-2	2.3253	0.0100041	0.000971090387360159	0.000417618610614371	ATP synthase subunit d, mitochondrial isoform Iso 2 \Gname=ATP5H
nxp:NX_P30049-1	-2.70465	0.01511	0.000169352279915872	0.00045803905395433	ATP synthase subunit delta, mitochondrial isoform Iso 1 \Gname=ATP5D
nxp:NX_P56385-1	-1.31356	0.0180345	0.000436372229823085	0.000573201871902491	ATP synthase subunit e, mitochondrial isoform Iso 1 \Gname=ATP5I
nxp:NX_O75964-1	1.41427	0.0132653	0.000984322048859973	0.000695994936206711	ATP synthase subunit g, mitochondrial isoform Iso 1 \Gname=ATP5L
nxp:NX_Q8NE86-1	1.35643	0.00499194	0.000454182588985389	0.000334837438158332	Calcium uniporter protein, mitochondrial isoform Iso 1 \Gname=MCU
nxp:NX_Q8NE86-3	1.35643	0.00499194	0.000527874466006197	0.00038916536686614	Calcium uniporter protein, mitochondrial isoform Iso 3 \Gname=MCU
nxp:NX_P10644-1	-1.6339	0.00936847	0.000227028948798413	0.00037094290244147	cAMP-dependent protein kinase type I-alpha regulatory subunit isoform Iso 1 \Gname=PRKAR1A
nxp:NX_O75828-1	2.48413	0.00365677	0.000474878871235489	0.000191164953535481	Carbonyl reductase [NADPH] 3 isoform Iso 1 \Gname=CBR3
nxp:NX_P55212-2	-1.97164	0.0283109	0.000217198754984629	0.000428237859941194	Caspase-6 isoform Beta \Gname=CASP6
nxp:NX_P21926-1	1.25288	0.0238746	0.00160744333040388	0.00128300039369016	CD9 antigen isoform Iso 1 \Gname=CD9
nxp:NX_P10909-2	-1.28324	0.00131712	0.000508289946140595	0.000652256103818251	Clusterin isoform Iso 2 \Gname=CLU
nxp:NX_P10909-5	-1.28324	0.00131712	0.000553594050035735	0.000710391973941182	Clusterin isoform Iso 3 \Gname=CLU
nxp:NX_P12259-1	-1.23902	0.00570589	0.000423246027880123	0.00052441057440335	Coagulation factor V isoform Iso 1 \Gname=F5
nxp:NX_Q9P1F3-1	-2.8459	0.00269067	0.000716651905654027	0.00203951616546556	Costars family protein ABRACL isoform Iso 1 \Gname=ABRACL
nxp:NX_Q86VP6-2	1.72111	0.0196955	0.000345327449382601	0.000200642253611611	Cullin-associated NEDD8-dissociated protein 1 isoform Iso 2 \Gname=CAND1
nxp:NX_O43169-1	1.45085	0.0487839	0.000415085588982446	0.000286098790787501	Cytochrome b5 type B isoform Iso 1 \Gname=CYB5B
nxp:NX_P28838-1	-1.47232	0.0183377	0.000262462086501283	0.000386428105424501	Cytosol aminopeptidase isoform Iso 2 \Gname=LAP3
nxp:NX_Q08495-3	-1.43567	0.000886087	0.000436809291774137	0.000627114419116991	Dematin isoform Iso 3 \Gname=DMTN
nxp:NX_Q9H4M9-1	1.29491	0.00252212	0.000862790649700375	0.000666292652557699	EH domain-containing protein 1 isoform Iso 1 \Gname=EHD1
nxp:NX_Q05639-1	1.62645	0.00314516	0.000433034874498108	0.00026624478189165	Elongation factor 1-alpha 2 isoform Iso 1 \Gname=EEF1A2
nxp:NX_P29692-3	1.38992	0.044973	0.000615289518718638	0.000442678586836316	Elongation factor 1-delta isoform Iso 3 \Gname=EEF1D
nxp:NX_P50402-1	-2.18706	7.88804e-05	0.000174559787781586	0.000381772974400898	Emerin isoform Iso 1 \Gname=EMD
nxp:NX_O94919-1	-1.47678	0.000332134	0.000287726109762667	0.000424907241157917	Endonuclease domain-containing 1 protein isoform Iso 1 \Gname=ENDOD1
nxp:NX_Q9Y371-1	1.53525	0.026608	0.000333763164013242	0.000217399272581339	Endophilin-B1 isoform Iso 3 \Gname=SH3GLB1
nxp:NX_Q9UBC2-4	1.43054	0.0011277	0.000336147703314343	0.000234979066388166	Epidermal growth factor receptor substrate 15-like 1 isoform Iso 4 \Gname=EPS15L1
nxp:NX_P30043-1	-1.46743	0.0298631	0.000388153587135497	0.000569589198487263	Flavin reductase (NADPH) isoform Iso 1 \Gname=BLVRB
nxp:NX_Q9Y2Q3-1	-1.27735	0.0116247	0.000324432123713616	0.000414412110936969	Glutathione S-transferase kappa 1 isoform Iso 1 \Gname=GSTK1
nxp:NX_Q9Y2Q3-2	-1.27735	0.0116247	0.000260005886380415	0.000332117507346649	Glutathione S-transferase kappa 1 isoform Iso 2 \Gname=GSTK1
nxp:NX_P09211-1	1.32069	1.08907e-05	0.00257915601580824	0.00195288143400867	Glutathione S-transferase P isoform Iso 1 \Gname=GSTP1
nxp:NX_P11216-1	1.24949	0.000743384	0.0007322746357025	0.000586060197227816	Glycogen phosphorylase, brain form isoform Iso 1 \Gname=PYGB
nxp:NX_P01116-1	1.47996	0.0228144	0.000662558999088129	0.000447686848910594	GTPase KRas isoform 2A \Gname=KRAS
nxp:NX_P01116-2	1.47996	0.0228144	0.000666083249083278	0.000450068161936713	GTPase KRas isoform 2B \Gname=KRAS
nxp:NX_Q15382-1	-1.68789	0.0207245	0.000327440496683554	0.000552682218162334	GTP-binding protein Rheb isoform Iso 1 \Gname=RHEB
nxp:NX_P04899-1	-1.42729	0.00069004	0.000699892846240149	0.000998951557192458	Guanine nucleotide-binding protein G(i) subunit alpha-2 isoform Iso 1 \Gname=GNA12
nxp:NX_P04899-2	-1.55113	5.82049e-05	0.000719008898001016	0.00111527604779616	Guanine nucleotide-binding protein G(i) subunit alpha-2 isoform Iso 2 \Gname=GNA12
nxp:NX_P04899-3	-1.55113	5.82049e-05	0.000766490617680329	0.0011889263528393	Guanine nucleotide-binding protein G(i) subunit alpha-2 isoform Iso 3 \Gname=GNA12
nxp:NX_P04899-4	-1.42729	0.00069004	0.000678857815342221	0.000968928422959898	Guanine nucleotide-binding protein G(i) subunit alpha-2 isoform sGi2 \Gname=GNA12
nxp:NX_P19086-1	1.41796	0.000776144	0.000778043659013678	0.000548707344568141	Guanine nucleotide-binding protein G(z) subunit alpha isoform Iso 1 \Gname=GNAZ
nxp:NX_O95837-1	-1.48785	0.0396432	0.000223427298910184	0.000332425682385613	Guanine nucleotide-binding protein subunit alpha-14 isoform Iso 1 \Gname=GNA14
nxp:NX_P02042-1	-1.3919	0.043717	0.00646953584951183	0.00900494261253243	Hemoglobin subunit delta isoform Iso 1 \Gname=HBD
nxp:NX_P19367-1	1.24371	0.00673529	0.000757455682882881	0.000609028074315508	Hexokinase-1 isoform Iso 1 \Gname=HK1
nxp:NX_P19367-2	1.24371	0.00673529	0.000758282599567252	0.000609692952125896	Hexokinase-1 isoform Iso 2 \Gname=HK1
nxp:NX_P19367-3	1.24371	0.00673529	0.000754165973076658	0.000606383001245734	Hexokinase-1 isoform Iso 3 \Gname=HK1
nxp:NX_P19367-4	1.24371	0.00673529	0.000767499294147627	0.000617103584693172	Hexokinase-1 isoform Iso 4 \Gname=HK1
nxp:NX_P13746-1	-1.47261	0.00549897	0.000429036940318496	0.000631802120056712	HLA class I histocompatibility antigen, A-11 alpha chain isoform Iso 1 \Gname=HLA-A
nxp:NX_P13746-2	-1.47261	0.00549897	0.00042209833751011	0.000621584296012668	HLA class I histocompatibility antigen, A-11 alpha chain isoform Iso 2 \Gname=HLA-A
nxp:NX_P05534-1	-1.3987	0.00847425	0.000554843909636265	0.000776060610152399	HLA class I histocompatibility antigen, A-24 alpha chain isoform Iso 1 \Gname=HLA-A
nxp:NX_P16188-1	-1.45196	0.0295222	0.000367532316034206	0.000533641783240141	HLA class I histocompatibility antigen, A-30 alpha chain isoform Iso 1 \Gname=HLA-A
nxp:NX_P16190-1	-1.48065	0.0179312	0.000439442526043467	0.000650661957511225	HLA class I histocompatibility antigen, A-33 alpha chain isoform Iso 1 \Gname=HLA-A
nxp:NX_P30462-1	-1.48513	0.04385	0.000409250781123678	0.000607790253346813	HLA class I histocompatibility antigen, B-14 alpha chain isoform Iso 1 \Gname=HLA-B
nxp:NX_P01834-1	-1.90991	1.97463e-05	0.000561130295082886	0.00107170573977209	Ig kappa chain C region isoform Iso 1 \Gname=IGKC
nxp:NX_P23229-2	-1.22339	6.41161e-05	0.000565527644218944	0.000691860717436167	Integrin alpha-6 isoform Alpha-6X1A \Gname=ITGA6
nxp:NX_P23229-3	-1.21191	0.000197068	0.000556197215625047	0.000674061927487396	Integrin alpha-6 isoform Alpha-6X1B \Gname=ITGA6
nxp:NX_P23229-6	-1.22339	6.41161e-05	0.000545693491229251	0.000667595818173568	Integrin alpha-6 isoform Alpha-6X1X2A \Gname=ITGA6
nxp:NX_P23229-1	-1.21191	0.000197068	0.000537001028537104	0.00065079784326438	Integrin alpha-6 isoform Alpha-6X1X2B \Gname=ITGA6
nxp:NX_P23229-5	-1.21191	0.000197068	0.000558757976286305	0.000677165343359806	Integrin alpha-6 isoform Alpha-6X2B \Gname=ITGA6
nxp:NX_P23229-4	-1.22339	6.41161e-05	0.000568175245549557	0.000695099765738771	Integrin alpha-6 isoform Iso 7 \Gname=ITGA6
nxp:NX_P23229-9	-1.22339	6.41161e-05	0.000553155115995376	0.000676724293353699	Integrin alpha-6 isoform Iso 9 \Gname=ITGA6
nxp:NX_Q9BX67-1	-1.62289	0.0169412	0.000204413595850838	0.000331741295303568	Junctional adhesion molecule C isoform Iso 1 \Gname=JAM3
nxp:NX_Q9BX67-2	-1.62289	0.0169412	0.000244664921674748	0.000397064870826665	Junctional adhesion molecule C isoform Iso 2 \Gname=JAM3
nxp:NX_P13645-1	-1.77585	0.00143867	0.00035483354113827	0.000630131721204642	Keratin, type I cytoskeletal 10 isoform Iso 1 \Gname=KRT10
nxp:NX_P02533-1	-1.40644	0.0290927	0.000245712853998768	0.00034557927159594	Keratin, type I cytoskeletal 14 isoform Iso 1 \Gname=KRT14
nxp:NX_P35527-1	-1.61485	0.0190653	0.000518448144900829	0.000837215850478267	Keratin, type I cytoskeletal 9 isoform Iso 1 \Gname=KRT9
nxp:NX_P04264-1	-1.62385	0.00379844	0.000755402236814693	0.00122666229854304	Keratin, type II cytoskeletal 1 isoform Iso 1 \Gname=KRT1
nxp:NX_P35908-1	-1.53028	0.0290872	0.000395483088401969	0.000605201088703624	Keratin, type II cytoskeletal 2 epidermal isoform Iso 1 \Gname=KRT2
nxp:NX_P04259-1	-1.5699	0.00564975	0.000234942993000017	0.0003688373529089	Keratin, type II cytoskeletal 6B isoform Iso 1 \Gname=KRT6B
nxp:NX_Q9Y608-2	1.33058	0.0227439	0.000344295423195232	0.00025875517665571	Leucine-rich repeat flightless-interacting protein 2 isoform Iso 3 \Gname=LRRFIP2
nxp:NX_O43561-1	1.532	0.00468784	0.000348067674560689	0.000227197984594451	Linker for activation of T-cells family member 1 isoform Long \Gname=LAT
nxp:NX_O43561-2	1.532	0.00468784	0.000391389402295711	0.000255475845337967	Linker for activation of T-cells family member 1 isoform Short \Gname=LAT
nxp:NX_Q5SQ64-1	1.28542	0.0392148	0.000863983346585179	0.00067214173509233	Lymphocyte antigen 6 complex locus protein G6f isoform Iso 1 \Gname=LY6G6F
nxp:NX_O00264-1	1.23612	0.0112793	0.000891445997697681	0.000721162013085925	Membrane-associated progesterone receptor component 1 isoform Iso 1 \Gname=PGRMC1
nxp:NX_Q92619-1	-1.26816	0.000433689	0.000305027244184415	0.000386823768344738	Minor histocompatibility protein HA-1 isoform Iso 1 \Gname=HMHA1
nxp:NX_Q16539-1	-1.42129	0.0106983	0.000266241236034842	0.000378404996985197	Mitogen-activated protein kinase 14 isoform CSBP2 \Gname=MAPK14
nxp:NX_Q8N699-1	-1.25065	0.0251969	0.000486773784090789	0.000608782657867377	Myc target protein 1 isoform Iso 1 \Gname=MYCT1
nxp:NX_Q9P0J0-1	-1.39985	0.0158316	0.000364821090885434	0.000510696146886703	NADH dehydrogenase [ubiquinone] 1 alpha subcomplex subunit 13 isoform Iso 1 \Gname=NDUFA13
nxp:NX_P55209-1	-1.20711	0.00825648	0.00060360555959893	0.000728619020387441	Nucleosome assembly protein 1-like 1 isoform Iso 1 \Gname=NAP1L1
nxp:NX_Q99733-1	-1.43935	9.77943e-05	0.000384018620543644	0.000552735834895126	Nucleosome assembly protein 1-like 4 isoform Iso 1 \Gname=NAP1L4
nxp:NX_Q92882-1	-1.26124	0.0194769	0.000286505395614283	0.000361352392902274	Osteoclast-stimulating factor 1 isoform Iso 1 \Gname=OSTF1
nxp:NX_Q9NR12-2	1.59089	0.0321999	0.00103181868662898	0.000648580780194874	PDZ and LIM domain protein 7 isoform Iso 2 \Gname=PDLIM7
nxp:NX_Q13162-1	-1.4257	0.00311088	0.00038203390450914	0.000544664913504788	Peroxiredoxin-4 isoform Iso 1 \Gname=PRDX4
nxp:NX_P16284-4	1.41315	0.000860885	0.000822859738926483	0.000582286833356919	Platelet endothelial cell adhesion molecule isoform Delta14 \Gname=PECAM1
nxp:NX_P16284-5	1.41315	0.000860885	0.000835644282892855	0.000591333662688735	Platelet endothelial cell adhesion molecule isoform Delta14-15 \Gname=PECAM1
nxp:NX_P16284-6	1.39334	0.000444656	0.000802398470550097	0.000575879275355742	Platelet endothelial cell adhesion molecule isoform Delta15 \Gname=PECAM1
nxp:NX_P10720-1	1.63445	0.0169232	0.00565453468088635	0.00345960203075807	Platelet factor 4 variant isoform Iso 1 \Gname=PF4V1
nxp:NX_Q15149-1	-1.99136	0.03501	0.00016828057899492	0.000335106421191743	Plectin isoform Iso 1 \Gname=PLEC
nxp:NX_Q15149-2	-1.99136	0.03501	0.000172327554003543	0.000343165386283805	Plectin isoform Iso 2 \Gname=PLEC
nxp:NX_Q15149-4	-1.99136	0.03501	0.000173350831759887	0.000345203095857076	Plectin isoform Iso 4 \Gname=PLEC
nxp:NX_Q15149-5	-1.99136	0.03501	0.000173350831759887	0.000345203095857076	Plectin isoform Iso 5 \Gname=PLEC
nxp:NX_Q15149-6	-1.99136	0.03501	0.000173198468910615	0.000344899687291173	Plectin isoform Iso 6 \Gname=PLEC
nxp:NX_Q15149-7	-1.99136	0.03501	0.000174579453380334	0.000347649718020404	Plectin isoform Iso 7 \Gname=PLEC
nxp:NX_Q15149-8	-1.99136	0.03501	0.000174193642433637	0.000346881431350746	Plectin isoform Iso 8 \Gname=PLEC
nxp:NX_Q15149-9	-1.99136	0.03501	0.000173886219283522	0.000346269242634486	Plectin isoform Iso 9 \Gname=PLEC
nxp:NX_P0CG47-1	-1.31559	0.0238143	0.000961076086210555	0.00126437852648156	Polyubiquitin-B isoform Iso 1 \Gname=UBB
nxp:NX_P0CG48-1	-1.33013	0.0204376	0.000317779816118931	0.00042269004753909	Polyubiquitin-C isoform Iso 1 \Gname=UBC
nxp:NX_Q6S8J3-1	1.41681	0.00508096	0.00266147211072267	0.00187850205272209	POTE ankyrin domain family member E isoform Iso 1 \Gname=POTEE
nxp:NX_A5A3E0-1	1.54828	0.00289922	0.00260817559690998	0.00168456179401564	POTE ankyrin domain family member F isoform Iso 1 \Gname=POTEF
nxp:NX_Q9UHV9-1	1.29762	0.0320936	0.000507472379563874	0.000391079756579522	Prefoldin subunit 2 isoform Iso 1 \Gname=PFDN2
nxp:NX_Q9H939-1	-1.4232	0.01391	0.000354696640720382	0.000504803969299346	Proline-serine-threonine phosphatase-interacting protein 2 isoform Iso 1 \Gname=PSTPIP2
nxp:NX_Q9H939-2	-2.03961	0.0107362	0.00019349541855689	0.000394655345992075	Proline-serine-threonine phosphatase-interacting protein 2 isoform Iso 2 \Gname=PSTPIP2
nxp:NX_Q15185-1	-1.61182	0.00174347	0.000318816009108183	0.000513873328910028	Prostaglandin E synthase 3 isoform Iso 1 \Gname=PTGES3
nxp:NX_P60900-1	1.31865	0.00207489	0.000566197308747564	0.000429377679202546	Proteasome subunit alpha type-6 isoform Iso 1 \Gname=PSMA6
nxp:NX_Q14554-1	-1.35993	0.0169049	0.000499661138526338	0.000679501897952593	Protein disulfide-isomerase A5 isoform Iso 1 \Gname=PDIA5
nxp:NX_Q99497-1	1.28851	0.00109243	0.0024877641518216	0.00193073621431255	Protein DJ-1 isoform Iso 1 \Gname=PARK7
nxp:NX_P55786-1	1.21615	0.0132835	0.000331331530665752	0.000272442130874883	Puromycin-sensitive aminopeptidase isoform Iso 1 \Gname=NPEPPS
nxp:NX_Q8IZP2-1	1.32027	0.0106298	0.00043077455019517	0.000326277520370092	Putative protein FAM10A4 isoform Iso 1 \Gname=ST13P4
nxp:NX_Q5JXB2-1	1.95162	0.00073197	0.00100537544895433	0.000515148684876592	Putative ubiquitin-conjugating enzyme E2 N-like isoform Iso 1 \Gname=UBE2NL
nxp:NX_Q13637-1	-1.37927	0.00939276	0.00064123491826853	0.000884433864506212	Ras-related protein Rab-32 isoform Iso 1 \Gname=RAB32
nxp:NX_Q15286-1	-1.32845	0.0339976	0.000265086122624303	0.000352153692784748	Ras-related protein Rab-35 isoform Iso 1 \Gname=RAB35
nxp:NX_P61018-1	1.67653	0.0101194	0.000401975210216367	0.000239766764574627	Ras-related protein Rab-4B isoform Iso 1 \Gname=RAB4B
nxp:NX_P61018-2	1.67653	0.0101194	0.000345244837806799	0.000205928713122562	Ras-related protein Rab-4B isoform Iso 2 \Gname=RAB4B
nxp:NX_P52565-1	-1.26684	0.0258254	0.000693603366960574	0.00087868205267308	Rho GDP-dissociation inhibitor 1 isoform Iso 1 \Gname=ARHGDIA
nxp:NX_P08134-1	1.40652	0.00520942	0.00168762533588313	0.00119986168232542	Rho-related GTP-binding protein RhoC isoform Iso 1 \Gname=RHOC
nxp:NX_P13489-1	1.25245	0.010311	0.000492301773311884	0.000393072121664855	Ribonuclease inhibitor isoform Iso 1 \Gname=RNH1
nxp:NX_P10124-1	1.41289	0.0198674	0.00106237713584681	0.00075191678931762	Serglycin isoform Iso 1 \Gname=SRGN
nxp:NX_Q9Y6E0-2	1.28861	0.00317761	0.000671933853102596	0.000521442378906111	Serine/threonine-protein kinase 24 isoform A \Gname=STK24
nxp:NX_Q9Y6E0-1	1.28861	0.00317761	0.000653732484621262	0.00050731752891317	Serine/threonine-protein kinase 24 isoform B \Gname=STK24
nxp:NX_Q9Y3F4-1	1.44797	0.00667813	0.000468269987412461	0.000323398300783953	Serine-threonine kinase receptor-associated protein isoform Iso 1 \Gname=STRAP
nxp:NX_P02768-1	-1.14076	0.000100162	0.00383398437390841	0.00437366484772837	Serum albumin isoform Iso 1 \Gname=ALB
nxp:NX_Q9UIB8-4	-1.81254	0.0278524	0.000189797033499938	0.0003440144528616	SLAM family member 5 isoform Iso 4 \Gname=CD84
nxp:NX_Q9UIB8-5	-1.81254	0.0278524	0.000195379299191113	0.000354132525004589	SLAM family member 5 isoform Iso 5 \Gname=CD84
nxp:NX_Q9UIB8-6	-1.81254	0.0278524	0.000220511076265489	0.000399684841498956	SLAM family member 5 isoform Iso 6 \Gname=CD84
nxp:NX_P61956-1	1.53022	0.000395549	0.000875445901997109	0.000572104510672883	Small ubiquitin-related modifier 2 isoform Iso 1 \Gname=SUMO2
nxp:NX_P61956-2	1.53022	0.000395549	0.00117137127732007	0.000765491950900335	Small ubiquitin-related modifier 2 isoform Iso 2 \Gname=SUMO2
nxp:NX_P55854-1	1.53022	0.000395549	0.000807450103783742	0.000527669208873047	Small ubiquitin-related modifier 3 isoform Iso 1 \Gname=SUMO3
nxp:NX_Q6EEV6-1	1.53022	0.000395549	0.000875445901997109	0.000572104510672883	Small ubiquitin-related modifier 4 isoform Iso 1 \Gname=SUMO4
nxp:NX_Q8TDB8-1	-1.3525	0.00246284	0.00035237686955587	0.000476590461125828	Solute carrier family 2, facilitated glucose transporter member 14 isoform Iso 1 \Gname=SLC2A14
nxp:NX_Q8TDB8-2	-1.3525	0.00246284	0.000368684048629884	0.000498645955302677	Solute carrier family 2, facilitated glucose transporter member 14 isoform Iso 3 \Gname=SLC2A14
nxp:NX_P11169-1	-1.37984	0.000693619	0.000369427363244058	0.00050975118801002	Solute carrier family 2, facilitated glucose transporter member 3 isoform Iso 1 \Gname=SLC2A3
nxp:NX_O60493-4	1.66494	0.0421241	0.000768036603875022	0.000461299966938252	Sorting nexin-3 isoform Iso 4 \Gname=SNX3
nxp:NX_P40227-2	-1.40073	0.00270464	0.000330974982378167	0.000463607344273452	T-complex protein 1 subunit zeta isoform Iso 2 \Gname=CCT6A
nxp:NX_P10599-1	1.43031	0.00502758	0.000892380285154147	0.000623906479575622	Thioredoxin isoform Iso 1 \Gname=TXN
nxp:NX_P10599-2	1.41121	0.00939117	0.00108763070853222	0.00077070800418165	Thioredoxin isoform Iso 2 \Gname=TXN
nxp:NX_P37802-1	1.24073	0.00138686	0.00470642807444747	0.00379325964599165	Transgelin-2 isoform Iso 1 \Gname=TAGLN2
nxp:NX_P53007-1	-1.3427	0.0379664	0.000252959996519129	0.000339650417302607	Tricarboxylate transport protein, mitochondrial isoform Iso 1 \Gname=SLC25A1
nxp:NX_P40939-1	1.51758	0.000316979	0.00041172622997997	0.000271304309201152	Trifunctional enzyme subunit alpha, mitochondrial isoform Iso 1 \Gname=HADHA
nxp:NX_P55084-1	1.29244	0.00166812	0.000506677729045531	0.000392032023390527	Trifunctional enzyme subunit beta, mitochondrial isoform Iso 1 \Gname=HADHB
nxp:NX_Q8NG06-1	-1.30067	0.0172924	0.000260810224372925	0.000339226872773006	Tripartite motif-containing protein 58 isoform Iso 1 \Gname=TRIM58
nxp:NX_Q9NYL9-1	1.32593	0.012701	0.000532537968012088	0.000401633543500193	Tropomodulin-3 isoform Iso 1 \Gname=TMOD3
nxp:NX_P09493-2	-1.87946	0.0370578	0.00143178923022647	0.00269099498305281	Tropomyosin alpha-1 chain isoform Iso 2 \Gname=TPM1
nxp:NX_P67936-2	-1.81987	0.0267309	0.00212107242233168	0.00386007652708149	Tropomyosin alpha-4 chain isoform Iso 2 \Gname=TPM4
nxp:NX_Q3ZCM7-1	1.42176	0.0330469	0.00210005957527453	0.00147708643178301	Tubulin beta-8 chain isoform Iso 1 \Gname=TUBB8
nxp:NX_A6NNZ2-1	1.42176	0.0330469	0.00210005957527453	0.00147708643178301	Tubulin beta-8 chain-like protein LOC260334 isoform Iso 1 \Gname=null
nxp:NX_Q6IBS0-1	1.296	0.0107549	0.00113813481335202	0.000878190121807371	Twinfilin-2 isoform Iso 1 \Gname=TWF2
nxp:NX_P06241-1	1.25337	0.0353413	0.000505291654341817	0.00040314614578382	Tyrosine-protein kinase Fyn isoform Iso 1 \Gname=FYN
nxp:NX_P06241-2	1.25337	0.0353413	0.000508130371501041	0.00040541101177137	Tyrosine-protein kinase Fyn isoform Iso 2 \Gname=FYN
nxp:NX_P06241-3	1.25337	0.0353413	0.000562949415729369	0.000449148299348364	Tyrosine-protein kinase Fyn isoform Iso 3 \Gname=FYN
nxp:NX_P62979-1	-1.31559	0.0238143	0.00141081040860396	0.00185604283695049	Ubiquitin-40S ribosomal protein S27a isoform Iso 1 \Gname=RPS27A
nxp:NX_P62987-1	-1.33013	0.0204376	0.00170061854719896	0.00226205220753341	Ubiquitin-60S ribosomal protein L40 isoform Iso 1 \Gname=UBA52
nxp:NX_Q8TF42-1	1.24395	0.0224084	0.00033234136428628	0.000267166508567931	Ubiquitin-associated and SH3 domain-containing protein B isoform Iso 1 \Gname=UBASH3B
nxp:NX_P61086-1	1.67363	0.0164081	0.000458232457889143	0.000273795478930149	Ubiquitin-conjugating enzyme E2 K isoform Iso 1 \Gname=UBE2K
nxp:NX_P61086-3	1.96488	0.0405043	0.000586943032818937	0.000298716279213814	Ubiquitin-conjugating enzyme E2 K isoform Iso 3 \Gname=UBE2K
nxp:NX_P61088-1	1.50584	0.00525794	0.000899384094978421	0.000597265572515515	Ubiquitin-conjugating enzyme E2 N isoform Iso 1 \Gname=UBE2N
nxp:NX_Q96IX5-1	1.65298	0.0460152	0.00107812215809521	0.00065222973761505	Up-regulated during skeletal muscle growth protein 5 isoform Iso 1 \Gname=USMG5
nxp:NX_P21796-1	1.38633	0.0264176	0.000626337453035185	0.000451795413185446	Voltage-dependent anion-selective channel protein 1 isoform Iso 1 \Gname=VDAC1
nxp:NX_Q9Y277-1	1.31852	0.0105802	0.00171393508528731	0.00129989636849593	Voltage-dependent anion-selective channel protein 3 isoform Iso 1 \Gname=VDAC3

## Sheet: (D)DifferentialExpressFinalList
Supplemental Table 2d: List of all differentially expressed proteins, include the proteins detected in only one biological condition (at least 3 technical replicates). The function description was extracted from the PlateletWeb (http://plateletweb.bioapps.biozentrum.uni-wuerzburg.de/plateletweb.php) or NextProt (http://www.nextprot.org/) databases.
Entry	Class	Gene Name	Description	FUNCTION
O95870	Down regulated in DENGUE	ABHD16A	Abhydrolase domain-containing protein 16A isoform Iso 1 \Gname=ABHD16A	Metabolic process. Hydrolase activity. Protein also known as: HLA-B-associated transcript 5.
Q9P1F3	Up-regulated in DENGUE	ABRACL	Costars family protein ABRACL isoform Iso 1 \Gname=ABRACL	No functional information for this protein.
Q9H845	Only in DENGUE	ACAD9	Acyl-CoA dehydrogenase family member 9, mitochondrial isoform Iso 1 \Gname=ACAD9	This gene encodes a member of the acyl-CoA dehydrogenase family. Members of this family of proteins localize to the mitochondria and catalyze the rate-limiting step in the beta-oxidation of fatty acyl-CoA. The encoded protein is specifically active toward palmitoyl-CoA and long-chain unsaturated substrates. Mutations in this gene cause acyl-CoA dehydrogenase family member type 9 deficiency. Alter…
P62736	Only in DENGUE	ACTA2	Actin, aortic smooth muscle isoform Iso 1 \Gname=ACTA2	The protein encoded by this gene belongs to the actin family of proteins, which are highly conserved proteins that play a role in cell motility, structure and integrity. Alpha, beta and gamma actin isoforms have been identified, with alpha actins being a major constituent of the contractile apparatus, while beta and gamma actins are involved in the regulation of cell motility. This actin is an al…
P60709	Only in Control	ACTB	Actin, cytoplasmic 1 isoform Iso 1 \Gname=ACTB	This gene encodes one of six different actin proteins. Actins are highly conserved proteins that are involved in cell motility, structure, and integrity. This actin is a major constituent of the contractile apparatus and one of the two nonmuscle cytoskeletal actins.
P63267	Only in DENGUE	ACTG2	Actin, gamma-enteric smooth muscle isoform Iso 1 \Gname=ACTG2	Actins are highly conserved proteins that are involved in various types of cell motility, and maintenance of the cytoskeleton. In vertebrates, three main groups of actin isoforms, alpha, beta and gamma have been identified. The alpha actins are found in muscle tissues and are a major constituent of the contractile apparatus. The beta and gamma actins co-exist in most cell types as components of t…
P61163	Up-regulated in DENGUE	ACTR1A	Alpha-centractin isoform Iso 1 \Gname=ACTR1A	This gene encodes a 42.6 kD subunit of dynactin, a macromolecular complex consisting of 10-11 subunits ranging in size from 22 to 150 kD. Dynactin binds to both microtubules and cytoplasmic dynein. It is involved in a diverse array of cellular functions, including ER-to-Golgi transport, the centripetal movement of lysosomes and endosomes, spindle formation, chromosome movement, nuclear positionin…
P30566	Only in DENGUE	ADSL	Adenylosuccinate lyase isoform Iso 2 \Gname=ADSL	Adenylsuccinate lyase is involved in both de novo synthesis of purines and formation of adenosine monophosphate from inosine monophosphate. It catalyzes two reactions in AMP biosynthesis: the removal of a fumarate from succinylaminoimidazole carboxamide (SAICA) ribotide to give aminoimidazole carboxamide ribotide (AICA) and removal of fumarate from adenylosuccinate to give AMP. Adenylosuccinase d…
Q9Y4W6	Only in Control	AFG3L2	AFG3-like protein 2 isoform Iso 1 \Gname=AFG3L2	This gene encodes a protein localized in mitochondria and closely related to paraplegin. The paraplegin gene is responsible for an autosomal recessive form of hereditary spastic paraplegia. This gene is a candidate gene for other hereditary spastic paraplegias or neurodegenerative disorders.
Q53H12	Only in Control	AGK	Acylglycerol kinase, mitochondrial isoform Iso 1 \Gname=AGK	Lipid kinase that can phosphorylate both monoacylglycerol and diacylglycerol to form lysophosphatidic acid (LPA) and phosphatidic acid (PA), respectively. Does not phosphorylate sphingosine. Overexpression increases the formation and secretion of LPA
P14550	Only in DENGUE	AKR1A1	Alcohol dehydrogenase [NADP(+)] isoform Iso 1 \Gname=AKR1A1	This gene encodes a member of the aldo/keto reductase superfamily, which consists of more than 40 known enzymes and proteins. This member, also known as aldehyde reductase, is involved in the reduction of biogenic and xenobiotic aldehydes and is present in virtually every tissue. Alternative splicing of this gene results in two transcript variants encoding the same protein
P02768	Up-regulated in DENGUE	ALB	Serum albumin isoform Iso 1 \Gname=ALB	Albumin is a soluble, monomeric protein which comprises about one-half of the blood serum protein. Albumin functions primarily as a carrier protein for steroids, fatty acids, and thyroid hormones and plays a role in stabilizing extracellular fluid volume. Albumin is a globular unglycosylated serum protein of molecular weight 65,000. Albumin is synthesized in the liver as preproalbumin which has a…
Q2TAA5	Only in Control	ALG11	GDP-Man:Man(3)GlcNAc(2)-PP-Dol alpha-1,2-mannosyltransferase isoform Iso 1 \Gname=ALG11	This gene encodes a GDP-Man:Man3GlcNAc2-PP-dolichol-alpha1,2-mannosyltransferase which is localized to the cytosolic side of the endoplasmic reticulum (ER) and catalyzes the transfer of the fourth and fifth mannose residue from GDP-mannose (GDP-Man) to Man3GlcNAc2-PP-dolichol and Man4GlcNAc2-PP-dolichol resulting in the production of Man5GlcNAc2-PP-dolichol. Mutations in this gene are associated …
P18054	Up-regulated in DENGUE	ALOX12	Arachidonate 12-lipoxygenase, 12S-type isoform Iso 1 \Gname=ALOX12	Non-heme iron-containing dioxygenase that catalyzes the stereo-specific peroxidation of free and esterified polyunsaturated fatty acids generating a spectrum of bioactive lipid mediators. Mainly converts arachidonic acid to (12S)-hydroperoxyeicosatetraenoic acid/(12S)-HPETE but can also metabolize linoleic acid
Q9NW15	Only in DENGUE	ANO10	Anoctamin-10 isoform Iso 4 \Gname=ANO10	Does not exhibit calcium-activated chloride channel (CaCC) activity. Can inhibit the activity of ANO1.
P20073	Only in DENGUE	ANXA7	Annexin A7 isoform Iso 1 \Gname=ANXA7	Annexin VII is a member of the annexin family of calcium-dependent phospholipid binding proteins.The Annexin VII gene contains 14 exons and spans approximately 34 kb of DNA. An alternatively spliced cassette exon results in two mRNA transcripts of 2.0 and 2.4 kb which are predicted to generate two protein isoforms differing in their N-terminal domain. The alternative splicing event is tissue spec…
P62330	Only in Control	ARF6	ADP-ribosylation factor 6 isoform Iso 1 \Gname=ARF6	This gene encodes a member of the human ARF gene family, which is part of the RAS superfamily. The ARF genes encode small guanine nucleotide-binding proteins that stimulate the ADP-ribosyltransferase activity of cholera toxin and play a role in vesicular trafficking and as activators of phospholipase D. The product of this gene is localized to the plasma membrane, and regulates vesicular traffick…
P52565	Up-regulated in DENGUE	ARHGDIA	Rho GDP-dissociation inhibitor 1 isoform Iso 1 \Gname=ARHGDIA	Aplysia Ras-related homologs (ARHs), also called Rho genes, belong to the RAS gene superfamily encoding small guanine nucleotide exchange (GTP/GDP) factors. The ARH proteins may be kept in the inactive, GDP-bound state by interaction with GDP dissociation inhibitors, such as ARHGDIA
P04424	Only in Control	ASL	Argininosuccinate lyase isoform Iso 3 \Gname=ASL	This gene encodes a member of the lyase 1 family. The encoded protein forms a cytosolic homotetramer and primarily catalyzes the reversible hydrolytic cleavage of argininosuccinate into arginine and fumarate, an essential step in the liver in detoxifying ammonia via the urea cycle. Mutations in this gene result in the autosomal recessive disorder argininosuccinic aciduria, or argininosuccinic aci…
P30049	Up-regulated in DENGUE	ATP5D	ATP synthase subunit delta, mitochondrial isoform Iso 1 \Gname=ATP5D	This gene encodes a subunit of mitochondrial ATP synthase. Mitochondrial ATP synthase catalyzes ATP synthesis, utilizing an electrochemical gradient of protons across the inner membrane during oxidative phosphorylation. ATP synthase is composed of two linked multi-subunit complexes: the soluble catalytic core, F1, and the membrane-spanning component, Fo, comprising the proton channel. The catalyt…
O75947	Down regulated in DENGUE	ATP5H	ATP synthase subunit d, mitochondrial isoform Iso 2 \Gname=ATP5H	Mitochondrial ATP synthase catalyzes ATP synthesis, utilizing an electrochemical gradient of protons across the inner membrane during oxidative phosphorylation. It is composed of two linked multi-subunit complexes: the soluble catalytic core, F1, and the membrane-spanning component, Fo, which comprises the proton channel.
P55854	Up-regulated in DENGUE	ATP5I	ATP synthase subunit e, mitochondrial isoform Iso 1 \Gname=ATP5I	Mitochondrial ATP synthase catalyzes ATP synthesis, utilizing an electrochemical gradient of protons across the inner membrane during oxidative phosphorylation. It is composed of two linked multi-subunit complexes: the soluble catalytic core, F1, and the membrane-spanning component, Fo, which comprises the proton channel. The F1 complex consists of 5 different subunits (alpha, beta, gamma, delta,…
O75964	Down regulated in DENGUE	ATP5L	ATP synthase subunit g, mitochondrial isoform Iso 1 \Gname=ATP5L	Mitochondrial ATP synthase catalyzes ATP synthesis, utilizing an electrochemical gradient of protons across the inner membrane during oxidative phosphorylation. It is composed of two linked multi-subunit complexes: the soluble catalytic core, F1, and the membrane-spanning component, Fo, which comprises the proton channel. The F1 complex consists of 5 different subunits (alpha, beta, gamma, delta,…
P30043	Up-regulated in DENGUE	BLVRB	Flavin reductase (NADPH) isoform Iso 1 \Gname=BLVRB	The final step in heme metabolism in mammals is catalyzed by the cytosolic biliverdin reductase enzymes A and B
Q9H3K6	Only in Control	BOLA2	BolA-like protein 2 isoform Iso 1 \Gname=BOLA2;BOLA2B	This gene is located within a region of a segmental duplication on chromosome 16p. The product of this gene belongs to the eukaryotic subfamily of the BolA-like proteins. This gene encodes the BolA-like protein 2. The BolA-like proteins are widely conserved from prokaryotes to eukaryotes, and these proteins seem to be involved in cell proliferation or cell-cycle regulation.
Q8N3F0	Only in Control	C7orf41	UPF0452 protein C7orf41 isoform Iso 1 \Gname=C7orf41	May be involved in early neuronal development (By similarity).
Q86VP6	Down regulated in DENGUE	CAND1	Cullin-associated NEDD8-dissociated protein 1 isoform Iso 2 \Gname=CAND1	Key assembly factor of SCF (SKP1-CUL1-F-box protein) E3 ubiquitin ligase complexes that promotes the exchange of the substrate-recognition F-box subunit in SCF complexes, thereby playing a key role in the cellular repertoire of SCF complexes.
P55212	Up-regulated in DENGUE	CASP6	Caspase-6 isoform Beta \Gname=CASP6	This gene encodes a protein which is a member of the cysteine-aspartic acid protease (caspase) family. Sequential activation of caspases plays a central role in the execution-phase of cell apoptosis. Caspases exist as inactive proenzymes which undergo proteolytic processing at conserved aspartic residues to produce two subunits, large and small, that dimerize to form the active enzyme. This prote…
O75828	Down regulated in DENGUE	CBR3	Carbonyl reductase [NADPH] 3 isoform Iso 1 \Gname=CBR3	Carbonyl reductase 3 catalyzes the reduction of a large number of biologically and pharmacologically active carbonyl compounds to their corresponding alcohols. The enzyme is classified as a monomeric NADPH-dependent oxidoreductase. CBR3 contains three exons spanning 11.2 kilobases and is closely linked to another carbonyl reductase gene - CBR1.
P40227	Up-regulated in DENGUE	CCT6A	T-complex protein 1 subunit zeta isoform Iso 2 \Gname=CCT6A	The protein encoded by this gene is a molecular chaperone that is a member of the chaperonin containing TCP1 complex (CCT), also known as the TCP1 ring complex (TRiC). This complex consists of two identical stacked rings, each containing eight different proteins. Unfolded polypeptides enter the central cavity of the complex and are folded in an ATP-dependent manner. The complex folds various prot…
Q6YHK3	Only in DENGUE	CD109	CD109 antigen isoform Iso 1 \Gname=CD109	This gene encodes a member of the alpha2-macroglobulin/complement superfamily. The encoded GPI-linked glycoprotein is found on the cell surface of platelets, activated T-cells, and endothelial cells. The protein binds to and negatively regulates signaling of transforming growth factor beta (TGF-beta). Multiple transcript variants encoding different isoforms have been found for this gene.
P28907	Only in Control	CD38	ADP-ribosyl cyclase 1 isoform Iso 1 \Gname=CD38	CD38 is a novel multifunctional ectoenzyme widely expressed in cells and tissues especially in leukocytes. CD38 also functions in cell adhesion,signal transduction and calcium signaling.
Q9UIB8	Up-regulated in DENGUE	CD84	SLAM family member 5 isoform Iso 4 \Gname=CD84	Members of the CD2 (see MIM 186990) subgroup of the Ig superfamily, such as CD84, have similar patterns of conserved disulfide bonds and function in adhesion interactions between T lymphocytes and accessory cells
P21926	Down regulated in DENGUE	CD9	CD9 antigen isoform Iso 1 \Gname=CD9	The protein encoded by this gene is a member of the transmembrane 4 superfamily, also known as the tetraspanin family. Most of these members are cell-surface proteins that are characterized by the presence of four hydrophobic domains. The proteins mediate signal transduction events that play a role in the regulation of cell development, activation, growth and motility. This encoded protein is a c…
Q16543	Only in DENGUE	CDC37	Hsp90 co-chaperone Cdc37 isoform Iso 1 \Gname=CDC37	The protein encoded by this gene is highly similar to Cdc 37, a cell division cycle control protein of Sacchromyces cerevisiae. This protein is a molecular chaperone with specific function in cell signal transduction. It has been shown to form complex with Hsp90 and a variety of protein kinases including CDK4, CDK6, SRC, RAF-1, MOK, as well as eIF2 alpha kinases. It is thought to play a critical …
P10909	Up-regulated in DENGUE	CLU	Clusterin isoform Iso 2 \Gname=CLU	The protein encoded by this gene appears to be involved in several basic biological events such as cell death, tumor progression, and neurodegenerative disorders. However, the function of this protein is unknown. Three transcript variants encoding different isoforms have been found for this gene, and one of them is secreted and processed into a mature form.
Q9UNS2	Only in Control	COPS3	COP9 signalosome complex subunit 3 isoform Iso 1 \Gname=COPS3	The protein encoded by this gene possesses kinase activity that phosphorylates regulators involved in signal transduction. It phosphorylates I kappa-Balpha, p105, and c-Jun. It acts as a docking site for complex-mediated phosphorylation. The gene is located within the Smith-Magenis syndrome region on chromosome 17. Two transcript variants encoding different isoforms have been found for this gene
Q6QEF8	Only in Control	CORO6	Coronin-6 isoform Iso 1 \Gname=CORO6	Actin cytoskeleton organization. Actin filament binding.
Q9GZU7	Only in DENGUE	CTDSP1	Carboxy-terminal domain RNA polymerase II polypeptide A small phosphatase 1 isoform Iso 1 \Gname=CTDSP1	Preferentially catalyzes the dephosphorylation of 'Ser-5' within the tandem 7 residue repeats in the C-terminal domain (CTD) of the largest RNA polymerase II subunit POLR2A. Negatively regulates RNA polymerase II transcription
O15194	Only in DENGUE	CTDSPL	CTD small phosphatase-like protein isoform Iso 1 \Gname=CTDSPL	Recruited by REST to neuronal genes that contain RE-1 elements, leading to neuronal gene silencing in non-neuronal cells (By similarity). Preferentially catalyzes the dephosphorylation of 'Ser-5' within the tandem 7 residue repeats in the C-terminal domain (CTD) of the largest RNA polymerase II subunit POLR2A.
P09341	Only in DENGUE	CXCL1	Growth-regulated alpha protein isoform Iso 1 \Gname=CXCL1	Chemokines are a group of small (approximately 8 to 14 kD), mostly basic, structurally related molecules that regulate cell trafficking of various types of leukocytes through interactions with a subset of 7-transmembrane, G protein-coupled receptors. Chemokines also play fundamental roles in the development, homeostasis, and function of the immune system, and they have effects on cells of the cen…
P19875	Only in DENGUE	CXCL2	C-X-C motif chemokine 2 isoform Iso 1 \Gname=CXCL2	Produced by activated monocytes and neutrophils and expressed at sites of inflammation. Hematoregulatory chemokine, which, in vitro, suppresses hematopoietic progenitor cell proliferation. GRO-beta(5-73) shows a highly enhanced hematopoietic activity.
P19876	Only in DENGUE	CXCL3	C-X-C motif chemokine 3 isoform Iso 1 \Gname=CXCL3	Ligand for CXCR2 (By similarity). Has chemotactic activity for neutrophils. May play a role in inflammation and exert its effects on endothelial cells in an autocrine fashion. In vitro, the processed form GRO-gamma(5-73) shows a fivefold higher chemotactic activity for neutrophilic granulocytes.
O43169	Down regulated in DENGUE	CYB5B	Cytochrome b5 type B isoform Iso 1 \Gname=CYB5B	Cytochrome b5 is a membrane bound hemoprotein which function as an electron carrier for several membrane bound oxygenases (By similarity).
A2RUS2	Only in Control	DENND3	DENN domain-containing protein 3 isoform Iso 1 \Gname=DENND3	Guanine nucleotide exchange factor (GEF) activating RAB12. Promotes the exchange of GDP to GTP, converting inactive GDP-bound RAB12 into its active GTP-bound form. Thereby, may play a role in protein transport from recycling endosomes to lysosomes regulating,
P49619	Only in Control	DGKG	Diacylglycerol kinase gamma isoform Iso 1 \Gname=DGKG	This gene encodes an enzyme that is a member of the type I subfamily of diacylglycerol kinases, which are involved in lipid metabolism. These enzymes generate phosphatidic acid by catalyzing the phosphorylation of diacylglycerol, a fundamental lipid second messenger that activates numerous proteins, including protein kinase C isoforms, Ras guanyl nucleotide-releasing proteins and some transient r…
Q08495	Up-regulated in DENGUE	DMTN	Dematin isoform Iso 3 \Gname=DMTN	Membrane-cytoskeleton-associated protein with F-actin-binding activity that induces F-actin bundles formation and stabilization. Its F-actin-bundling activity is reversibly regulated upon its phosphorylation by the cAMP-dependent protein kinase A (PKA).
Q9BVJ7	Only in Control	DUSP23	Dual specificity protein phosphatase 23 isoform Iso 1 \Gname=DUSP23	Protein phosphatase that mediates dephosphorylation of proteins phosphorylated on Tyr and Ser/Thr residues. In vitro, it can dephosphorylate p44-ERK1 (MAPK3) but not p54 SAPK-beta (MAPK10) in vitro. Able to enhance activation of JNK and p38 (MAPK14).
Q05639	Down regulated in DENGUE	EEF1A2	Elongation factor 1-alpha 2 isoform Iso 1 \Gname=EEF1A2	This gene encodes an isoform of the alpha subunit of the elongation factor-1 complex, which is responsible for the enzymatic delivery of aminoacyl tRNAs to the ribosome. This isoform (alpha 2) is expressed in brain, heart and skeletal muscle, and the other isoform (alpha 1) is expressed in brain, placenta, lung, liver, kidney, and pancreas. This gene may be critical in the development of ovarian …
P29692	Down regulated in DENGUE	EEF1D	Elongation factor 1-delta isoform Iso 3 \Gname=EEF1D	This gene encodes a subunit of the elongation factor-1 complex, which is responsible for the enzymatic delivery of aminoacyl tRNAs to the ribosome. This subunit, delta, functions as guanine nucleotide exchange factor. It is reported that following HIV-1 infection, this subunit interacts with HIV-1 Tat. This interaction results in repression of translation of host cell proteins and enhanced transl…
Q9H4M9	Down regulated in DENGUE	EHD1	EH domain-containing protein 1 isoform Iso 1 \Gname=EHD1	This gene belongs to a highly conserved gene family encoding EPS15 homology (EH) domain-containing proteins. The protein-binding EH domain was first noted in EPS15, a substrate for the epidermal growth factor receptor. The EH domain has been shown to be an important motif in proteins involved in protein-protein interactions and in intracellular sorting. The protein encoded by this gene is thought…
P60228	Only in Control	EIF3E	Eukaryotic translation initiation factor 3 subunit E isoform Iso 1 \Gname=EIF3E	Component of the eukaryotic translation initiation factor 3 (eIF-3) complex, which is required for several steps in the initiation of protein synthesis. The eIF-3 complex associates with the 40S ribosome and facilitates the recruitment of eIF-1, eIF-1A,
P50402	Up-regulated in DENGUE	EMD	Emerin isoform Iso 1 \Gname=EMD	Emerin is a serine-rich nuclear membrane protein and a member of the nuclear lamina-associated protein family. It mediates membrane anchorage to the cytoskeleton. Dreifuss-Emery muscular dystrophy is an X-linked inherited degenerative myopathy resulting from mutation in the emerin gene.
O94919	Up-regulated in DENGUE	ENDOD1	Endonuclease domain-containing 1 protein isoform Iso 1 \Gname=ENDOD1	May act as a DNase and a RNase (Potential).
Q5NDL2	Only in Control	EOGT	EGF domain-specific O-linked N-acetylglucosamine transferase isoform Iso 1 \Gname=EOGT	Catalyzes the transfer of a single N-acetylglucosamine from UDP-GlcNAc to a serine or threonine residue in extracellular proteins resulting in their modification with a beta-linked N-acetylglucosamine (O-GlcNAc). Specifically glycosylates the Thr residue located between the fifth and sixth conserved cysteines of folded EGF-like domains.
Q9Y2J2	Only in DENGUE	EPB41L3	Band 4.1-like protein 3 isoform A \Gname=EPB41L3	Tumor suppressor that inhibits cell proliferation and promotes apoptosis. Modulates the activity of protein arginine N-methyltransferases, including PRMT3 and PRMT5.
P07814	Only in DENGUE	EPRS	Bifunctional glutamate/proline--tRNA ligase isoform Iso 1 \Gname=EPRS	Aminoacyl-tRNA synthetases are a class of enzymes that charge tRNAs with their cognate amino acids. The protein encoded by this gene is a multifunctional aminoacyl-tRNA synthetase that catalyzes the aminoacylation of glutamic acid and proline tRNA species. Alternative splicing has been observed for this gene, but the full-length nature and biological validity of the variant have not been determin…
Q9UBC2	Down regulated in DENGUE	EPS15L1	Epidermal growth factor receptor substrate 15-like 1 isoform Iso 4 \Gname=EPS15L1	Seems to be a constitutive component of clathrin-coated pits that is required for receptor-mediated endocytosis. Involved in endocytosis of integrin beta-1 (ITGB1) and transferrin receptor (TFR); internalization of ITGB1 as DAB2-dependent cargo but not TFR seems to require association with DAB2.
Q96RI0	Only in DENGUE	F2RL3	Proteinase-activated receptor 4 isoform Iso 1 \Gname=F2RL3	Coagulation factor II (thrombin) receptor-like 3 (F2RL3) is a member of the large family of 7-transmembrane-region receptors that couple to guanosine-nucleotide-binding proteins. F2RL3 is also a member of the protease-activated receptor family. F2RL3 is activated by proteolytic cleavage of its extracellular amino terminus. The new amino terminus functions as a tethered ligand and activates the re…
P12259	Up-regulated in DENGUE	F5	Coagulation factor V isoform Iso 1 \Gname=F5	This gene encodes an essential cofactor of the blood coagulation cascade. This factor circulates in plasma, and is converted to the active form by the release of the activation peptide by thrombin during coagulation. This generates a heavy chain and a light chain which are held together by calcium ions. The activated protein is a cofactor that participates with activated coagulation factor X to a…
Q01469	Only in DENGUE	FABP5	Fatty acid-binding protein, epidermal isoform Iso 1 \Gname=FABP5	This gene encodes the fatty acid binding protein found in epidermal cells, and was first identified as being upregulated in psoriasis tissue. Fatty acid binding proteins are a family of small, highly conserved, cytoplasmic proteins that bind long-chain fatty acids and other hydrophobic ligands. It is thought that FABPs roles include fatty acid uptake, transport, and metabolism. The human genome c…
Q96GK7	Only in DENGUE	FAHD2A	Fumarylacetoacetate hydrolase domain-containing protein 2A isoform Iso 1 \Gname=FAHD2A	May have hydrolase activity (By similarity).
Q6P2I3	Only in DENGUE	FAHD2B	Fumarylacetoacetate hydrolase domain-containing protein 2B isoform Iso 1 \Gname=FAHD2B	May have hydrolase activity (By similarity).
Q5W0V3	Only in DENGUE	FAM160B1	Protein FAM160B1 isoform Iso 1 \Gname=FAM160B1	No functional information for this protein.
Q96MK2	Only in DENGUE	FAM65C	Protein FAM65C isoform Iso 2 \Gname=FAM65C	No functional information for this protein.
Q5JSP0	Only in Control	FGD3	FYVE, RhoGEF and PH domain-containing protein 3 isoform Iso 1 \Gname=FGD3	Promotes the formation of filopodia. May activate CDC42, a member of the Ras-like family of Rho- and Rac proteins, by exchanging bound GDP for free GTP. Plays a role in regulating the actin cytoskeleton and cell shape (By similarity).
Q13643	Only in DENGUE	FHL3	Four and a half LIM domains protein 3 isoform Iso 1 \Gname=FHL3	LIM proteins are defined by the possession of a highly conserved double zinc finger motif called the LIM domain
P06241	Down regulated in DENGUE	FYN	Tyrosine-protein kinase Fyn isoform Iso 1 \Gname=FYN	This gene is a member of the protein-tyrosine kinase oncogene family. It encodes a membrane-associated tyrosine kinase that has been implicated in the control of cell growth. The protein associates with the p85 subunit of phosphatidylinositol 3-kinase and interacts with the fyn-binding protein. Alternatively spliced transcript variants encoding distinct isoforms exist.
Q10471	Only in Control	GALNT2	Polypeptide N-acetylgalactosaminyltransferase 2 isoform Iso 1 \Gname=GALNT2	This gene encodes polypeptide N-acetylgalactosaminyltransferase 2, a member of the GalNAc-transferases family. This family transfers an N-acetyl galactosamine to the hydroxyl group of a serine or threonine residue in the first step of O-linked oligosaccharide biosynthesis. Individual GalNAc-transferases have distinct activities and initiation of O-glycosylation in a cell is regulated by a reperto…
O14556	Only in DENGUE	GAPDHS	Glyceraldehyde-3-phosphate dehydrogenase, testis-specific isoform Iso 1 \Gname=GAPDHS	This gene encodes a protein belonging to the glyceraldehyde-3-phosphate dehydrogenase family of enzymes that play an important role in carbohydrate metabolism. Like its somatic cell counterpart, this sperm-specific enzyme functions in a nicotinamide adenine dinucleotide-dependent manner to remove hydrogen and add phosphate to glyceraldehyde 3-phosphate to form 1,3-diphosphoglycerate. During sperm…
O94925	Only in Control	GLS	Glutaminase kidney isoform, mitochondrial isoform Iso 1 \Gname=GLS	Catalyzes the first reaction in the primary pathway for the renal catabolism of glutamine. Plays a role in maintaining acid-base homeostasis. Regulates the levels of the neurotransmitter glutamate in the brain.
Q96IJ6	Only in DENGUE	GMPPA	Mannose-1-phosphate guanyltransferase alpha isoform Iso 1 \Gname=GMPPA	This gene is thought to encode a GDP-mannose pyrophosphorylase. This enzyme catalyzes the reaction which converts mannose-1-phosphate and GTP to GDP-mannose which is involved in the production of N-linked oligosaccharides.
O95837	Up-regulated in DENGUE	GNA14	Guanine nucleotide-binding protein subunit alpha-14 isoform Iso 1 \Gname=GNA14	This gene encodes a member of the guanine nucleotide-binding, or G protein family. G proteins are heterotrimers consisting of alpha, beta and gamma subunits. The encoded protein is a member of the alpha family of G proteins, more specifically the alpha q subfamily of G proteins. The encoded protein may play a role in pertussis-toxin resistant activation of phospholipase C-beta and its downstream …
P04899	Up-regulated in DENGUE	GNA12	Guanine nucleotide-binding protein G(i) subunit alpha-2 isoform Iso 1 \Gname=GNA12	The protein encoded by this gene is an alpha subunit of guanine nucleotide binding proteins (G proteins). The encoded protein contains the guanine nucleotide binding site and is involved in the hormonal regulation of adenylate cyclase. Several transcript variants encoding different isoforms have been detected for this gene, but the full-length nature of only two are known so far.
P19086	Down regulated in DENGUE	GNAZ	Guanine nucleotide-binding protein G(z) subunit alpha isoform Iso 1 \Gname=GNAZ	The protein encoded by this gene is a member of a G protein subfamily that mediates signal transduction in pertussis toxin-insensitive systms. This encoded protein may play a role in maintaining the ionic balance of perilymphatic and endolymphatic cochlear fluids.
O00461	Only in DENGUE	GOLIM4	Golgi integral membrane protein 4 isoform Iso 1 \Gname=GOLIM4	The Golgi complex plays a key role in the sorting and modification of proteins exported from the endoplasmic reticulum. The protein encoded by this gene is a type II Golgi-resident protein. It may process proteins synthesized in the rough endoplasmic reticulum and assist in the transport of protein cargo through the Golgi apparatus.
P62993	Only in DENGUE	GRB2	Growth factor receptor-bound protein 2 isoform Iso 2 \Gname=GRB2	The protein encoded by this gene binds the epidermal growth factor receptor and contains one SH2 domain and two SH3 domains. Its two SH3 domains direct complex formation with proline-rich regions of other proteins, and its SH2 domain binds tyrosine phosphorylated sequences. This gene is similar to the Sem5 gene of C.elegans, which is involved in the signal transduction pathway. Two alternatively …
Q9Y2Q3	Up-regulated in DENGUE	GSTK1	Glutathione S-transferase kappa 1 isoform Iso 1 \Gname=GSTK1	This gene encodes a member of the kappa class of the glutathione transferase superfamily of enzymes that function in cellular detoxification. The encoded protein is localized to the peroxisome and catalyzes the conjugation of glutathione to a wide range of hydrophobic substates facilitating the removal of these compounds from cells. Alternative splicing results in multiple transcript variants.
P09211	Down regulated in DENGUE	GSTP1	Glutathione S-transferase P isoform Iso 1 \Gname=GSTP1	Glutathione S-transferases (GSTs) are a family of enzymes that play an important role in detoxification by catalyzing the conjugation of many hydrophobic and electrophilic compounds with reduced glutathione. Based on their biochemical, immunologic, and structural properties, the soluble GSTs are categorized into 4 main classes: alpha, mu, pi, and theta. This GST family member is a polymorphic gen…
Q9BTM1	Only in DENGUE	H2AFJ	Histone H2A.J isoform Iso 1 \Gname=H2AFJ	Histones are basic nuclear proteins that are responsible for the nucleosome structure of the chromosomal fiber in eukaryotes. Nucleosomes consist of approximately 146 bp of DNA wrapped around a histone octamer composed of pairs of each of the four core histones (H2A, H2B, H3, and H4). The chromatin fiber is further compacted through the interaction of a linker histone, H1, with the DNA between th…
P16104	Only in DENGUE	H2AFX	Histone H2A.x isoform Iso 1 \Gname=H2AFX	Histones are basic nuclear proteins that are responsible for the nucleosome structure of the chromosomal fiber in eukaryotes. Nucleosomes consist of approximately 146 bp of DNA wrapped around a histone octamer composed of pairs of each of the four core histones (H2A, H2B, H3, and H4). The chromatin fiber is further compacted through the interaction of a linker histone, H1, with the DNA between th…
P40939	Down regulated in DENGUE	HADHA	Trifunctional enzyme subunit alpha, mitochondrial isoform Iso 1 \Gname=HADHA	This gene encodes the alpha subunit of the mitochondrial trifunctional protein, which catalyzes the last three steps of mitochondrial beta-oxidation of long chain fatty acids. The mitochondrial membrane-bound heterocomplex is composed of four alpha and four beta subunits, with the alpha subunit catalyzing the 3-hydroxyacyl-CoA dehydrogenase and enoyl-CoA hydratase activities. Mutations in this ge…
P55084	Down regulated in DENGUE	HADHB	Trifunctional enzyme subunit beta, mitochondrial isoform Iso 1 \Gname=HADHB	This gene encodes the beta subunit of the mitochondrial trifunctional protein, which catalyzes the last three steps of mitochondrial beta-oxidation of long chain fatty acids. The mitochondrial membrane-bound heterocomplex is composed of four alpha and four beta subunits, with the beta subunit catalyzing the 3-ketoacyl-CoA thiolase activity. Mutations in this gene result in trifunctional protein d…
P02042	Up-regulated in DENGUE	HBD	Hemoglobin subunit delta isoform Iso 1 \Gname=HBD	The delta (HBD) and beta (HBB) genes are normally expressed in the adult: two alpha chains plus two beta chains constitute HbA, which in normal adult life comprises about 97% of the total hemoglobin. Two alpha chains plus two delta chains constitute HbA-2, which with HbF comprises the remaining 3% of adult hemoglobin. Five beta-like globin genes are found within a 45 kb cluster on chromosome 11 i…
Q96QV6	Only in DENGUE	HIST1H2AA	Histone H2A type 1-A isoform Iso 1 \Gname=HIST1H2AA	Histones are basic nuclear proteins that are responsible for the nucleosome structure of the chromosomal fiber in eukaryotes. Nucleosomes consist of approximately 146 bp of DNA wrapped around a histone octamer composed of pairs of each of the four core histones (H2A, H2B, H3, and H4). The chromatin fiber is further compacted through the interaction of a linker histone, H1, with the DNA between th…
P04908	Only in DENGUE	HIST1H2AB	Histone H2A type 1-B/E isoform Iso 1 \Gname=HIST1H2AB;HIST1H2AE	Histones are basic nuclear proteins that are responsible for the nucleosome structure of the chromosomal fiber in eukaryotes. Nucleosomes consist of approximately 146 bp of DNA wrapped around a histone octamer composed of pairs of each of the four core histones (H2A, H2B, H3, and H4). The chromatin fiber is further compacted through the interaction of a linker histone, H1, with the DNA between th…
Q93077	Only in DENGUE	HIST1H2AC	Histone H2A type 1-C isoform Iso 1 \Gname=HIST1H2AC	Histones are basic nuclear proteins that are responsible for the nucleosome structure of the chromosomal fiber in eukaryotes. Nucleosomes consist of approximately 146 bp of DNA wrapped around a histone octamer composed of pairs of each of the four core histones (H2A, H2B, H3, and H4). The chromatin fiber is further compacted through the interaction of a linker histone, H1, with the DNA between th…
P20671	Only in DENGUE	HIST1H2AD	Histone H2A type 1-D isoform Iso 1 \Gname=HIST1H2AD	Histones are basic nuclear proteins that are responsible for the nucleosome structure of the chromosomal fiber in eukaryotes. Nucleosomes consist of approximately 146 bp of DNA wrapped around a histone octamer composed of pairs of each of the four core histones (H2A, H2B, H3, and H4). The chromatin fiber is further compacted through the interaction of a linker histone, H1, with the DNA between th…
P0C0S8	Only in DENGUE	HIST1H2AH	Histone H2A type 1-H isoform Iso 1 \Gname=HIST1H2AH	Histones are basic nuclear proteins that are responsible for the nucleosome structure of the chromosomal fiber in eukaryotes. Nucleosomes consist of approximately 146 bp of DNA wrapped around a histone octamer composed of pairs of each of the four core histones (H2A, H2B, H3, and H4). The chromatin fiber is further compacted through the interaction of a linker histone, H1, with the DNA between th…
Q99878	Only in DENGUE	HIST1H2AJ	Histone H2A type 1-J isoform Iso 1 \Gname=HIST1H2AJ	Histones are basic nuclear proteins that are responsible for the nucleosome structure of the chromosomal fiber in eukaryotes. Nucleosomes consist of approximately 146 bp of DNA wrapped around a histone octamer composed of pairs of each of the four core histones (H2A, H2B, H3, and H4). The chromatin fiber is further compacted through the interaction of a linker histone, H1, with the DNA between th…
Q6FI13	Only in DENGUE	HIST2H2AA3	Histone H2A type 2-A isoform Iso 1 \Gname=HIST2H2AA3;HIST2H2AA4	Histones are basic nuclear proteins that are responsible for the nucleosome structure of the chromosomal fiber in eukaryotes. Nucleosomes consist of approximately 146 bp of DNA wrapped around a histone octamer composed of pairs of each of the four core histones (H2A, H2B, H3, and H4). The chromatin fiber is further compacted through the interaction of a linker histone, H1, with the DNA between th…
Q8IUE6	Only in DENGUE	HIST2H2AB	Histone H2A type 2-B isoform Iso 1 \Gname=HIST2H2AB	Histones are basic nuclear proteins that are responsible for the nucleosome structure of the chromosomal fiber in eukaryotes. Nucleosomes consist of approximately 146 bp of DNA wrapped around a histone octamer composed of pairs of each of the four core histones (H2A, H2B, H3, and H4). The chromatin fiber is further compacted through the interaction of a linker histone, H1, with the DNA between th…
Q16777	Only in DENGUE	HIST2H2AC	Histone H2A type 2-C isoform Iso 1 \Gname=HIST2H2AC	Histones are basic nuclear proteins that are responsible for the nucleosome structure of the chromosomal fiber in eukaryotes. Nucleosomes consist of approximately 146 bp of DNA wrapped around a histone octamer composed of pairs of each of the four core histones (H2A, H2B, H3, and H4). The chromatin fiber is further compacted through the interaction of a linker histone, H1, with the DNA between th…
Q7L7L0	Only in DENGUE	HIST3H2A	Histone H2A type 3 isoform Iso 1 \Gname=HIST3H2A	Histones are basic nuclear proteins that are responsible for the nucleosome structure of the chromosomal fiber in eukaryotes. Nucleosomes consist of approximately 146 bp of DNA wrapped around a histone octamer composed of pairs of each of the four core histones (H2A, H2B, H3, and H4). The chromatin fiber is further compacted through the interaction of a linker histone, H1, with the DNA between th…
P19367	Down regulated in DENGUE	HK1	Hexokinase-1 isoform Iso 1 \Gname=HK1	Hexokinases phosphorylate glucose to produce glucose-6-phosphate, the first step in most glucose metabolism pathways. This gene encodes a ubiquitous form of hexokinase which localizes to the outer membrane of mitochondria. Mutations in this gene have been associated with hemolytic anemia due to hexokinase deficiency. Alternative splicing of this gene results in five transcript variants which enco…
P01891	Only in Control	HLA-A	HLA class I histocompatibility antigen, A-68 alpha chain isoform Iso 1 \Gname=HLA-A	HLA-A belongs to the HLA class I heavy chain paralogues. This class I molecule is a heterodimer consisting of a heavy chain and a light chain (beta-2 microglobulin). The heavy chain is anchored in the membrane. Class I molecules play a central role in the immune system by presenting peptides derived from the endoplasmic reticulum lumen. They are expressed in nearly all cells. The heavy chain is a…
P30443	Only in Control	HLA-A	HLA class I histocompatibility antigen, A-1 alpha chain isoform Iso 1 \Gname=HLA-A	HLA-A belongs to the HLA class I heavy chain paralogues. This class I molecule is a heterodimer consisting of a heavy chain and a light chain (beta-2 microglobulin). The heavy chain is anchored in the membrane. Class I molecules play a central role in the immune system by presenting peptides derived from the endoplasmic reticulum lumen. They are expressed in nearly all cells. The heavy chain is a…
P30455	Only in Control	HLA-A	HLA class I histocompatibility antigen, A-36 alpha chain isoform Iso 1 \Gname=HLA-A	HLA-A belongs to the HLA class I heavy chain paralogues. This class I molecule is a heterodimer consisting of a heavy chain and a light chain (beta-2 microglobulin). The heavy chain is anchored in the membrane. Class I molecules play a central role in the immune system by presenting peptides derived from the endoplasmic reticulum lumen. They are expressed in nearly all cells. The heavy chain is a…
P05534	Up-regulated in DENGUE	HLA-A	HLA class I histocompatibility antigen, A-24 alpha chain isoform Iso 1 \Gname=HLA-A	HLA-A belongs to the HLA class I heavy chain paralogues. This class I molecule is a heterodimer consisting of a heavy chain and a light chain (beta-2 microglobulin). The heavy chain is anchored in the membrane. Class I molecules play a central role in the immune system by presenting peptides derived from the endoplasmic reticulum lumen. They are expressed in nearly all cells. The heavy chain is a…
P13746	Up-regulated in DENGUE	HLA-A	HLA class I histocompatibility antigen, A-11 alpha chain isoform Iso 1 \Gname=HLA-A	HLA-A belongs to the HLA class I heavy chain paralogues. This class I molecule is a heterodimer consisting of a heavy chain and a light chain (beta-2 microglobulin). The heavy chain is anchored in the membrane. Class I molecules play a central role in the immune system by presenting peptides derived from the endoplasmic reticulum lumen. They are expressed in nearly all cells. The heavy chain is a…
P16188	Up-regulated in DENGUE	HLA-A	HLA class I histocompatibility antigen, A-30 alpha chain isoform Iso 1 \Gname=HLA-A	HLA-A belongs to the HLA class I heavy chain paralogues. This class I molecule is a heterodimer consisting of a heavy chain and a light chain (beta-2 microglobulin). The heavy chain is anchored in the membrane. Class I molecules play a central role in the immune system by presenting peptides derived from the endoplasmic reticulum lumen. They are expressed in nearly all cells. The heavy chain is a…
P16190	Up-regulated in DENGUE	HLA-A	HLA class I histocompatibility antigen, A-33 alpha chain isoform Iso 1 \Gname=HLA-A	HLA-A belongs to the HLA class I heavy chain paralogues. This class I molecule is a heterodimer consisting of a heavy chain and a light chain (beta-2 microglobulin). The heavy chain is anchored in the membrane. Class I molecules play a central role in the immune system by presenting peptides derived from the endoplasmic reticulum lumen. They are expressed in nearly all cells. The heavy chain is a…
P10319	Only in DENGUE	HLA-B	HLA class I histocompatibility antigen, B-58 alpha chain isoform Iso 1 \Gname=HLA-B	HLA-B belongs to the HLA class I heavy chain paralogues. This class I molecule is a heterodimer consisting of a heavy chain and a light chain (beta-2 microglobulin). The heavy chain is anchored in the membrane. Class I molecules play a central role in the immune system by presenting peptides derived from the endoplasmic reticulum lumen. They are expressed in nearly all cells. The heavy chain is a…
P18463	Only in DENGUE	HLA-B	HLA class I histocompatibility antigen, B-37 alpha chain isoform Iso 1 \Gname=HLA-B	HLA-B belongs to the HLA class I heavy chain paralogues. This class I molecule is a heterodimer consisting of a heavy chain and a light chain (beta-2 microglobulin). The heavy chain is anchored in the membrane. Class I molecules play a central role in the immune system by presenting peptides derived from the endoplasmic reticulum lumen. They are expressed in nearly all cells. The heavy chain is a…
P30464	Only in DENGUE	HLA-B	HLA class I histocompatibility antigen, B-15 alpha chain isoform Iso 1 \Gname=HLA-B	HLA-B belongs to the HLA class I heavy chain paralogues. This class I molecule is a heterodimer consisting of a heavy chain and a light chain (beta-2 microglobulin). The heavy chain is anchored in the membrane. Class I molecules play a central role in the immune system by presenting peptides derived from the endoplasmic reticulum lumen. They are expressed in nearly all cells. The heavy chain is a…
P30466	Only in DENGUE	HLA-B	HLA class I histocompatibility antigen, B-18 alpha chain isoform Iso 1 \Gname=HLA-B	HLA-B belongs to the HLA class I heavy chain paralogues. This class I molecule is a heterodimer consisting of a heavy chain and a light chain (beta-2 microglobulin). The heavy chain is anchored in the membrane. Class I molecules play a central role in the immune system by presenting peptides derived from the endoplasmic reticulum lumen. They are expressed in nearly all cells. The heavy chain is a…
P30481	Only in DENGUE	HLA-B	HLA class I histocompatibility antigen, B-44 alpha chain isoform Iso 1 \Gname=HLA-B	HLA-B belongs to the HLA class I heavy chain paralogues. This class I molecule is a heterodimer consisting of a heavy chain and a light chain (beta-2 microglobulin). The heavy chain is anchored in the membrane. Class I molecules play a central role in the immune system by presenting peptides derived from the endoplasmic reticulum lumen. They are expressed in nearly all cells. The heavy chain is a…
P30483	Only in DENGUE	HLA-B	HLA class I histocompatibility antigen, B-45 alpha chain isoform Iso 1 \Gname=HLA-B	HLA-B belongs to the HLA class I heavy chain paralogues. This class I molecule is a heterodimer consisting of a heavy chain and a light chain (beta-2 microglobulin). The heavy chain is anchored in the membrane. Class I molecules play a central role in the immune system by presenting peptides derived from the endoplasmic reticulum lumen. They are expressed in nearly all cells. The heavy chain is a…
P30484	Only in DENGUE	HLA-B	HLA class I histocompatibility antigen, B-46 alpha chain isoform Iso 1 \Gname=HLA-B	HLA-B belongs to the HLA class I heavy chain paralogues. This class I molecule is a heterodimer consisting of a heavy chain and a light chain (beta-2 microglobulin). The heavy chain is anchored in the membrane. Class I molecules play a central role in the immune system by presenting peptides derived from the endoplasmic reticulum lumen. They are expressed in nearly all cells. The heavy chain is a…
P30485	Only in DENGUE	HLA-B	HLA class I histocompatibility antigen, B-47 alpha chain isoform Iso 1 \Gname=HLA-B	HLA-B belongs to the HLA class I heavy chain paralogues. This class I molecule is a heterodimer consisting of a heavy chain and a light chain (beta-2 microglobulin). The heavy chain is anchored in the membrane. Class I molecules play a central role in the immune system by presenting peptides derived from the endoplasmic reticulum lumen. They are expressed in nearly all cells. The heavy chain is a…
P30487	Only in DENGUE	HLA-B	HLA class I histocompatibility antigen, B-49 alpha chain isoform Iso 1 \Gname=HLA-B	HLA-B belongs to the HLA class I heavy chain paralogues. This class I molecule is a heterodimer consisting of a heavy chain and a light chain (beta-2 microglobulin). The heavy chain is anchored in the membrane. Class I molecules play a central role in the immune system by presenting peptides derived from the endoplasmic reticulum lumen. They are expressed in nearly all cells. The heavy chain is a…
P30488	Only in DENGUE	HLA-B	HLA class I histocompatibility antigen, B-50 alpha chain isoform Iso 1 \Gname=HLA-B	HLA-B belongs to the HLA class I heavy chain paralogues. This class I molecule is a heterodimer consisting of a heavy chain and a light chain (beta-2 microglobulin). The heavy chain is anchored in the membrane. Class I molecules play a central role in the immune system by presenting peptides derived from the endoplasmic reticulum lumen. They are expressed in nearly all cells. The heavy chain is a…
P30495	Only in DENGUE	HLA-B	HLA class I histocompatibility antigen, B-56 alpha chain isoform Iso 1 \Gname=HLA-B	HLA-B belongs to the HLA class I heavy chain paralogues. This class I molecule is a heterodimer consisting of a heavy chain and a light chain (beta-2 microglobulin). The heavy chain is anchored in the membrane. Class I molecules play a central role in the immune system by presenting peptides derived from the endoplasmic reticulum lumen. They are expressed in nearly all cells. The heavy chain is a…
Q04826	Only in DENGUE	HLA-B	HLA class I histocompatibility antigen, B-40 alpha chain isoform Iso 1 \Gname=HLA-B	HLA-B belongs to the HLA class I heavy chain paralogues. This class I molecule is a heterodimer consisting of a heavy chain and a light chain (beta-2 microglobulin). The heavy chain is anchored in the membrane. Class I molecules play a central role in the immune system by presenting peptides derived from the endoplasmic reticulum lumen. They are expressed in nearly all cells. The heavy chain is a…
P30462	Up-regulated in DENGUE	HLA-B	HLA class I histocompatibility antigen, B-14 alpha chain isoform Iso 1 \Gname=HLA-B	HLA-B belongs to the HLA class I heavy chain paralogues. This class I molecule is a heterodimer consisting of a heavy chain and a light chain (beta-2 microglobulin). The heavy chain is anchored in the membrane. Class I molecules play a central role in the immune system by presenting peptides derived from the endoplasmic reticulum lumen. They are expressed in nearly all cells. The heavy chain is a…
Q92619	Up-regulated in DENGUE	HMHA1	Minor histocompatibility protein HA-1 isoform Iso 1 \Gname=HMHA1	Precursor of the histocompatibility antigen HA-1. More generally, minor histocompatibility antigens (mHags) refer to immunogenic peptide which, when complexed with MHC, can generate an immune response after recognition by specific T-cells
O43390	Only in DENGUE	HNRNPR	Heterogeneous nuclear ribonucleoprotein R isoform Iso 1 \Gname=HNRNPR	This gene belongs to the subfamily of ubiquitously expressed heterogeneous nuclear ribonucleoproteins (hnRNPs). The hnRNPs are RNA binding proteins and they complex with heterogeneous nuclear RNA (hnRNA). These proteins are associated with pre-mRNAs in the nucleus and appear to influence pre-mRNA processing and other aspects of mRNA metabolism and transport. While all of the hnRNPs are present in…
P00738	Only in DENGUE	HP	Haptoglobin isoform Iso 1 \Gname=HP	This gene encodes a preproprotein, which is processed to yield both alpha and beta chains, which subsequently combine as a tetramer to produce haptoglobin. Haptoglobin functions to bind free plasma hemoglobin, which allows degradative enzymes to gain access to the hemoglobin, while at the same time preventing loss of iron through the kidneys and protecting the kidneys from damage by hemoglobin. M…
P04196	Only in Control	HRG	Histidine-rich glycoprotein isoform Iso 1 \Gname=HRG	This histidine-rich glycoprotein contains two cystatin-like domains and is located in plasma and platelets. The physiological function has not been determined but it is known that the protein binds heme, dyes and divalent metal ions. It can inhibit rosette formation and interacts with heparin, thrombospondin and plasminogen. Two of the protein's effects, the inhibition of fibrinolysis and the red…
P48741	Only in Control	HSPA7	Putative heat shock 70 kDa protein 7 isoform Iso 1 \Gname=HSPA7	Response to stress. ATP binding.
Q7Z6Z7	Only in Control	HUWE1	E3 ubiquitin-protein ligase HUWE1 isoform Iso 1 \Gname=HUWE1	This gene encodes a member of the HECT E3 ubiquitin ligase family. The HECT domain lies in the C-terminus and contains the active-site cysteine which forms an intermediate ubiquitin-thioester bond. E3 family members are divided into three subfamilies based on their protein-protein interaction domains; this gene encodes a member of the SI(ngle)-HECT E3 subfamily. In lung, breast, and colorectal ca…
P01834	Up-regulated in DENGUE	IGKC	Ig kappa chain C region isoform Iso 1 \Gname=IGKC	Retina homeostasis. Immune response. Antigen binding.
P12268	Only in DENGUE	IMPDH2	Inosine-5'-monophosphate dehydrogenase 2 isoform Iso 1 \Gname=IMPDH2	This gene encodes the rate-limiting enzyme in the de novo guanine nucleotide biosynthesis. It is thus involved in maintaining cellular guanine deoxy- and ribonucleotide pools needed for DNA and RNA synthesis. The encoded protein catalyzes the NAD-dependent oxidation of inosine-5'-monophosphate into xanthine-5'-monophosphate, which is then converted into guanosine-5'-monophosphate. This gene is up…
P23229	Up-regulated in DENGUE	ITGA6	Integrin alpha-6 isoform Alpha-6X1A \Gname=ITGA6	The ITGA6 protein product is the integrin alpha chain alpha 6. Integrins are integral cell-surface proteins composed of an alpha chain and a beta chain. A given chain may combine with multiple partners resulting in different integrins. For example, alpha 6 may combine with beta 4 in the integrin referred to as TSP180, or with beta 1 in the integrin VLA-6. Integrins are known to participate in cel…
Q9BX67	Up-regulated in DENGUE	JAM3	Junctional adhesion molecule C isoform Iso 1 \Gname=JAM3	Tight junctions represent one mode of cell-to-cell adhesion in epithelial or endothelial cell sheets, forming continuous seals around cells and serving as a physical barrier to prevent solutes and water from passing freely through the paracellular space. The protein encoded by this immunoglobulin superfamily gene member is localized in the tight junctions between high endothelial cells. Unlike ot…
P01116	Down regulated in DENGUE	KRAS	GTPase KRas isoform 2A \Gname=KRAS	This gene, a Kirsten ras oncogene homolog from the mammalian ras gene family, encodes a protein that is a member of the small GTPase superfamily. A single amino acid substitution is responsible for an activating mutation. The transforming protein that results is implicated in various malignancies, including lung adenocarcinoma, mucinous adenoma, ductal carcinoma of the pancreas and colorectal car…
P04264	Up-regulated in DENGUE	KRT1	Keratin, type II cytoskeletal 1 isoform Iso 1 \Gname=KRT1	The protein encoded by this gene is a member of the keratin gene family. The type II cytokeratins consist of basic or neutral proteins which are arranged in pairs of heterotypic keratin chains coexpressed during differentiation of simple and stratified epithelial tissues. This type II cytokeratin is specifically expressed in the spinous and granular layers of the epidermis with family member KRT1…
P13645	Up-regulated in DENGUE	KRT10	Keratin, type I cytoskeletal 10 isoform Iso 1 \Gname=KRT10	This gene encodes a member of the type I (acidic) cytokeratin family, which belongs to the superfamily of intermediate filament (IF) proteins. Keratins are heteropolymeric structural proteins which form the intermediate filament. These filaments, along with actin microfilaments and microtubules, compose the cytoskeleton of epithelial cells. Mutations in this gene are associated with epidermolytic…
P02533	Up-regulated in DENGUE	KRT14	Keratin, type I cytoskeletal 14 isoform Iso 1 \Gname=KRT14	This gene encodes a member of the keratin family, the most diverse group of intermediate filaments. This gene product, a type I keratin, is usually found as a heterotetramer with two keratin 5 molecules, a type II keratin. Together they form the cytoskeleton of epithelial cells. Mutations in the genes for these keratins are associated with epidermolysis bullosa simplex. At least one pseudogene ha…
P08779	Only in DENGUE	KRT16	Keratin, type I cytoskeletal 16 isoform Iso 1 \Gname=KRT16	The protein encoded by this gene is a member of the keratin gene family. The keratins are intermediate filament proteins responsible for the structural integrity of epithelial cells and are subdivided into cytokeratins and hair keratins. Most of the type I cytokeratins consist of acidic proteins which are arranged in pairs of heterotypic keratin chains and are clustered in a region of chromosome …
P35908	Up-regulated in DENGUE	KRT2	Keratin, type II cytoskeletal 2 epidermal isoform Iso 1 \Gname=KRT2	The protein encoded by this gene is a member of the keratin gene family. The type II cytokeratins consist of basic or neutral proteins which are arranged in pairs of heterotypic keratin chains coexpressed during differentiation of simple and stratified epithelial tissues. This type II cytokeratin is expressed largely in the upper spinous layer of epidermal keratinocytes and mutations in this gene…
P04259	Up-regulated in DENGUE	KRT6B	Keratin, type II cytoskeletal 6B isoform Iso 1 \Gname=KRT6B	The protein encoded by this gene is a member of the keratin gene family. The type II cytokeratins consist of basic or neutral proteins which are arranged in pairs of heterotypic keratin chains coexpressed during differentiation of simple and stratified epithelial tissues. As many as six of this type II cytokeratin (KRT6) have been identified; the multiplicity of the genes is attributed to success…
P35527	Up-regulated in DENGUE	KRT9	Keratin, type I cytoskeletal 9 isoform Iso 1 \Gname=KRT9	This gene encodes the type I keratin 9, an intermediate filament chain expressed only in the terminally differentiated epidermis of palms and soles. Mutations in this gene cause epidermolytic palmoplantar keratoderma.
P28838	Up-regulated in DENGUE	LAP3	Cytosol aminopeptidase isoform Iso 2 \Gname=LAP3	Presumably involved in the processing and regular turnover of intracellular proteins. Catalyzes the removal of unsubstituted N-terminal amino acids from various peptides.
O43561	Down regulated in DENGUE	LAT	Linker for activation of T-cells family member 1 isoform Long \Gname=LAT	The protein encoded by this gene is phosphorylated by ZAP-70/Syk protein tyrosine kinases following activation of the T-cell antigen receptor (TCR) signal transduction pathway. This transmembrane protein localizes to lipid rafts and acts as a docking site for SH2 domain-containing proteins. Upon phosphorylation, this protein recruits multiple adaptor proteins and downstream signaling molecules in…
Q08380	Only in DENGUE	LGALS3BP	Galectin-3-binding protein isoform Iso 1 \Gname=LGALS3BP	The galectins are a family of beta-galactoside-binding proteins implicated in modulating cell-cell and cell-matrix interactions. LGALS3BP has been found elevated in the serum of patients with cancer and in those infected by the human immunodeficiency virus (HIV). It appears to be implicated in immune response associated with natural killer (NK) and lymphokine-activated killer (LAK) cell cytotoxic…
Q9Y608	Down regulated in DENGUE	LRRFIP2	Leucine-rich repeat flightless-interacting protein 2 isoform Iso 3 \Gname=LRRFIP2	May function as activator of the canonical Wnt signaling pathway, in association with DVL3, upstream of CTNNB1/beta-catenin. Positively regulates Toll-like receptor (TLR) signaling in response to agonist probably by competing with the negative FLII regulator for MYD88-binding
Q5SQ64	Down regulated in DENGUE	LY6G6F	Lymphocyte antigen 6 complex locus protein G6f isoform Iso 1 \Gname=LY6G6F	The human G6f protein is a type I transmembrane protein belonging to the immunoglobin (Ig) superfamily, which is comprised of cell-surface proteins involved in the immune system and cellular recognition
P27338	Down regulated in DENGUE	MAOB	Amine oxidase [flavin-containing] B isoform Iso 1 \Gname=MAOB	The protein encoded by this gene belongs to the flavin monoamine oxidase family. It is a enzyme located in the mitochondrial outer membrane. It catalyzes the oxidative deamination of biogenic and xenobiotic amines and plays an important role in the metabolism of neuroactive and vasoactive amines in the central nervous sysytem and peripheral tissues. This protein preferentially degrades benzylamin…
Q16539	Up-regulated in DENGUE	MAPK14	Mitogen-activated protein kinase 14 isoform CSBP2 \Gname=MAPK14	The protein encoded by this gene is a member of the MAP kinase family. MAP kinases act as an integration point for multiple biochemical signals, and are involved in a wide variety of cellular processes such as proliferation, differentiation, transcription regulation and development. This kinase is activated by various environmental stresses and proinflammatory cytokines. The activation requires i…
Q8NE86	Down regulated in DENGUE	MCU	Calcium uniporter protein, mitochondrial isoform Iso 1 \Gname=MCU	Mitochondrial inner membrane calcium uniporter that mediates calcium uptake into mitochondria. Mitochondrial calcium homeostasis plays key roles in cellular physiology and regulates cell bioenergetics, cytoplasmic calcium signals and activation of cell death pathways.
P23368	Only in DENGUE	ME2	NAD-dependent malic enzyme, mitochondrial isoform Iso 2 \Gname=ME2	This gene encodes a mitochondrial NAD-dependent malic enzyme, a homotetrameric protein, that catalyzes the oxidative decarboxylation of malate to pyruvate. It had previously been weakly linked to a syndrome known as Friedreich ataxia that has since been shown to be the result of mutation in a completely different gene. Certain single-nucleotide polymorphism haplotypes of this gene have been shown…
Q00013	Down regulated in DENGUE	MPP1	55 kDa erythrocyte membrane protein isoform Iso 1 \Gname=MPP1	This gene encodes the prototype of the membrane-associated guanylate kinase (MAGUK) family proteins. MAGUKs interact with the cytoskeleton and regulate cell proliferation, signaling pathways, and intercellular junctions. The encoded protein is an extensively palmitoylated membrane phosphoprotein containing a PDZ domain, a Src homology 3 (SH3) motif, and a guanylate kinase domain. This gene produc…
Q9P289	Only in DENGUE	MST4	Serine/threonine-protein kinase MST4 isoform Iso 1 \Gname=MST4	The product of this gene is a member of the GCK group III family of kinases, which are a subset of the Ste20-like kinases. The encoded protein contains an amino-terminal kinase domain, and a carboxy-terminal regulatory domain that mediates homodimerization. The protein kinase localizes to the Golgi apparatus and is specifically activated by binding to the Golgi matrix protein GM130. It is also cl…
Q13126	Only in DENGUE	MTAP	S-methyl-5'-thioadenosine phosphorylase isoform Iso 1 \Gname=MTAP	This gene encodes an enzyme that plays a major role in polyamine metabolism and is important for the salvage of both adenine and methionine. The encoded enzyme is deficient in many cancers because this gene and the tumor suppressor p16 gene are co-deleted. Multiple alternatively spliced transcript variants have been described for this gene, but their full-length natures remain unknown
O43312	Only in DENGUE	MTSS1	Metastasis suppressor protein 1 isoform Iso 2 \Gname=MTSS1	May be related to cancer progression or tumor metastasis in a variety of organ sites, most likely through an interaction with the actin cytoskeleton.
P20591	Only in DENGUE	MX1	Interferon-induced GTP-binding protein Mx1 isoform Iso 1 \Gname=MX1	In mouse, the interferon-inducible Mx protein is responsible for a specific antiviral state against influenza virus infection. The protein encoded by this gene is similar to the mouse protein as determined by its antigenic relatedness, induction conditions, physicochemical properties, and amino acid analysis. This cytoplasmic protein is a member of both the dynamin family and the family of large …
Q8N699	Up-regulated in DENGUE	MYCT1	Myc target protein 1 isoform Iso 1 \Gname=MYCT1	May regulate certain MYC target genes, MYC seems to be a direct upstream transcriptional activator. Does not seem to significantly affect growth cell capacity. Overexpression seems to mediate many of the known phenotypic features associated with MYC
Q9UBC5	Only in Control	MYO1A	Unconventional myosin-Ia isoform Iso 1 \Gname=MYO1A	The protein encoded by this gene belongs to the myosin superfamily. Myosins are molecular motors that, upon interaction with actin filaments, utilize energy from ATP hydrolysis to generate mechanical force. Each myosin has a conserved N-terminal motor domain that contains both ATP-binding and actin-binding sequences. Following the motor domain is a light-chain-binding 'neck' region containing 1-6…
O43795	Only in Control	MYO1B	Unconventional myosin-Ib isoform Iso 1 \Gname=MYO1B	Motor protein that may participate in process critical to neuronal development and function such as cell migration, neurite outgrowth and vesicular transport (By similarity).
P55209	Up-regulated in DENGUE	NAP1L1	Nucleosome assembly protein 1-like 1 isoform Iso 1 \Gname=NAP1L1	This gene encodes a member of the nucleosome assembly protein (NAP) family. This protein participates in DNA replication and may play a role in modulating chromatin formation and contribute to the regulation of cell proliferation. Alternative splicing of this gene results in several transcript variants; however, not all have been fully described.
Q99733	Up-regulated in DENGUE	NAP1L4	Nucleosome assembly protein 1-like 4 isoform Iso 1 \Gname=NAP1L4	This gene encodes a member of the nucleosome assembly protein (NAP) family which can interact with both core and linker histones. It can shuttle between the cytoplasm and nucleus, suggesting a role as a histone chaperone. This gene is one of several located near the imprinted gene domain of 11p15.5, an important tumor-suppressor gene region. Alterations in this region have been associated with th…
P54920	Up-regulated in DENGUE	NAPA	Alpha-soluble NSF attachment protein isoform Iso 1 \Gname=NAPA	The 'SNARE hypothesis' is a model explaining the process of docking and fusion of vesicles to their target membranes. According to this model, membrane proteins from the vesicle (v-SNAREs) and proteins from the target membrane (t-SNAREs) govern the specificity of vesicle targeting and docking through mutual recognition. Once the 2 classes of SNAREs bind to each other, they form a complex that rec…
Q9P0J0	Up-regulated in DENGUE	NDUFA13	NADH dehydrogenase [ubiquinone] 1 alpha subcomplex subunit 13 isoform Iso 1 \Gname=NDUFA13	This gene encodes a subunit of the mitochondrial membrane respiratory chain NADH dehydrogenase (Complex I), which functions in the transfer of electrons from NADH to the respiratory chain. The protein is required for complex I assembly and electron transfer activity. The protein binds the signal transducers and activators of transcription 3 (STAT3) transcription factor, and can function as a tumo…
O75306	Only in DENGUE	NDUFS2	NADH dehydrogenase [ubiquinone] iron-sulfur protein 2, mitochondrial isoform Iso 1 \Gname=NDUFS2	The protein encoded by this gene is a core subunit of the mitochondrial membrane respiratory chain NADH dehydrogenase (complex I). Mammalian mitochondrial complex I is composed of at least 43 different subunits, 7 of which are encoded by the mitochondrial genome, and the rest are the products of nuclear genes. The iron-sulfur protein fraction of complex I is made up of 7 subunits, including this …
Q9UMS0	Only in DENGUE	NFU1	NFU1 iron-sulfur cluster scaffold homolog, mitochondrial isoform Iso 2 \Gname=NFU1	Iron-sulfur cluster scaffold protein which can assemble [4Fe-2S] clusters and deliver them to target proteins.
P55786	Down regulated in DENGUE	NPEPPS	Puromycin-sensitive aminopeptidase isoform Iso 1 \Gname=NPEPPS	This gene encodes the puromycin-sensitive aminopeptidase, a zinc metallopeptidase which hydrolyzes amino acids from the N-terminus of its substrate. The protein has been localized to both the cytoplasm and to cellular membranes. This enzyme degrades enkaphalins in the brain, and studies in mouse suggest that it is involved in proteolytic events regulating the cell cycle.
Q92882	Up-regulated in DENGUE	OSTF1	Osteoclast-stimulating factor 1 isoform Iso 1 \Gname=OSTF1	Osteoclast-stimulating factor-1 is an intracellular protein produced by osteoclasts that indirectly induces osteoclast formation and bone resorption
O95747	Only in Control	OXSR1	Serine/threonine-protein kinase OSR1 isoform Iso 1 \Gname=OXSR1	The product of this gene belongs to the Ser/Thr protein kinase family of proteins. It regulates downstream kinases in response to environmental stress, and may play a role in regulating the actin cytoskeleton
Q99497	Down regulated in DENGUE	PARK7	Protein DJ-1 isoform Iso 1 \Gname=PARK7	The product of this gene belongs to the peptidase C56 family of proteins. It acts as a positive regulator of androgen receptor-dependent transcription. It may also function as a redox-sensitive chaperone, as a sensor for oxidative stress, and it apparently protects neurons against oxidative stress and cell death. Defects in this gene are the cause of autosomal recessive early-onset Parkinson dise…
Q8WW12	Only in Control	PCNP	PEST proteolytic signal-containing nuclear protein isoform Iso 1 \Gname=PCNP	May be involved in cell cycle regulation.
O14737	Only in DENGUE	PDCD5	Programmed cell death protein 5 isoform Iso 1 \Gname=PDCD5	May function in the process of apoptosis.
Q14554	Up-regulated in DENGUE	PDIA5	Protein disulfide-isomerase A5 isoform Iso 1 \Gname=PDIA5	Response to endoplasmic reticulum stress. Protein folding. Oxidation-reduction process.
Q9NR12	Down regulated in DENGUE	PDLIM7	PDZ and LIM domain protein 7 isoform Iso 2 \Gname=PDLIM7	The protein encoded by this gene is representative of a family of proteins composed of conserved PDZ and LIM domains. LIM domains are proposed to function in protein-protein recognition in a variety of contexts including gene transcription and development and in cytoskeletal interaction. The LIM domains of this protein bind to protein kinases, whereas the PDZ domain binds to actin filaments. The …
P16284	Down regulated in DENGUE	PECAM1	Platelet endothelial cell adhesion molecule isoform Delta14 \Gname=PECAM1	The protein encoded by this gene is found on the surface of platelets, monocytes, neutrophils, and some types of T-cells, and makes up a large portion of endothelial cell intercellular junctions. The encoded protein is a member of the immunoglobulin superfamily and is likely involved in leukocyte migration, angiogenesis, and integrin activation
O96011	Only in Control	PEX11B	Peroxisomal membrane protein 11B isoform Iso 1 \Gname=PEX11B	Involved in peroxisomal proliferation. May regulate peroxisomes division by recruiting the dynamin-related GTPase DNM1L to the peroxisomal membrane.
P10720	Down regulated in DENGUE	PF4V1	Platelet factor 4 variant isoform Iso 1 \Gname=PF4V1	Inhibitor of angiogenesis. Inhibitor of endothelial cell chemotaxis (in vitro).
O15067	Only in Control	PFAS	Phosphoribosylformylglycinamidine synthase isoform Iso 1 \Gname=PFAS	Purines are necessary for many cellular processes, including DNA replication, transcription, and energy metabolism. Ten enzymatic steps are required to synthesize inosine monophosphate (IMP) in the de novo pathway of purine biosynthesis. The enzyme encoded by this gene catalyzes the fourth step of IMP biosynthesis.
Q9UHV9	Down regulated in DENGUE	PFDN2	Prefoldin subunit 2 isoform Iso 1 \Gname=PFDN2	This gene encodes a member of the prefoldin beta subunit family. The encoded protein is one of six subunits of prefoldin, a molecular chaperone complex that binds and stabilizes newly synthesized polypeptides, thereby allowing them to fold correctly. The complex, consisting of two alpha and four beta subunits, forms a double beta barrel assembly with six protruding coiled-coils.
O00264	Down regulated in DENGUE	PGRMC1	Membrane-associated progesterone receptor component 1 isoform Iso 1 \Gname=PGRMC1	This gene encodes a putative membrane-associated progesterone steroid receptor. The protein is expressed predominantly in the liver and kidney.
Q16512	Only in DENGUE	PKN1	Serine/threonine-protein kinase N1 isoform Iso 1 \Gname=PKN1	The protein encoded by this gene belongs to the protein kinase C superfamily. This kinase is activated by Rho family of small G proteins and may mediate the Rho-dependent signaling pathway. This kinase can be activated by phospholipids and by limited proteolysis. The 3-phosphoinositide dependent protein kinase-1 (PDPK1/PDK1) is reported to phosphorylate this kinase, which may mediate insulin sign…
Q15149	Up-regulated in DENGUE	PLEC	Plectin isoform Iso 1 \Gname=PLEC	Plectin is a prominent member of an important family of structurally and in part functionally related proteins, termed plakins or cytolinkers, that are capable of interlinking different elements of the cytoskeleton. Plakins, with their multi-domain structure and enormous size, not only play crucial roles in maintaining cell and tissue integrity and orchestrating dynamic changes in cytoarchitectur…
Q15126	Only in DENGUE	PMVK	Phosphomevalonate kinase isoform Iso 1 \Gname=PMVK	PMVK is a peroxisomal enzyme that catalyzes the conversion of mevalonate 5-phosphate into mevalonate 5-diphosphate as the fifth reaction of the cholesterol biosynthetic pathway
Q6S8J3	Down regulated in DENGUE	POTEE	POTE ankyrin domain family member E isoform Iso 1 \Gname=POTEE	Retina homeostasis. Substantia nigra development.
A5A3E0	Down regulated in DENGUE	POTEF	POTE ankyrin domain family member F isoform Iso 1 \Gname=POTEF	Retina homeostasis
Q9H2U2	Only in DENGUE	PPA2	Inorganic pyrophosphatase 2, mitochondrial isoform Iso 1 \Gname=PPA2	The protein encoded by this gene is localized to the mitochondrion, is highly similar to members of the inorganic pyrophosphatase (PPase) family, and contains the signature sequence essential for the catalytic activity of PPase. PPases catalyze the hydrolysis of pyrophosphate to inorganic phosphate, which is important for the phosphate metabolism of cells. Alternate transcriptional splice variant…
Q13162	Up-regulated in DENGUE	PRDX4	Peroxiredoxin-4 isoform Iso 1 \Gname=PRDX4	The protein encoded by this gene is an antioxidant enzyme and belongs to the peroxiredoxin family. The protein is localized to the cytoplasm. Peroxidases of the peroxiredoxin family reduce hydrogen peroxide and alkyl hydroperoxides to water and alcohol with the use of reducing equivalents derived from thiol-containing donor molecules. This protein has been found to play a regulatory role in the a…
P10644	Up-regulated in DENGUE	PRKAR1A	cAMP-dependent protein kinase type I-alpha regulatory subunit isoform Iso 1 \Gname=PRKAR1A	cAMP is a signaling molecule important for a variety of cellular functions. cAMP exerts its effects by activating the cAMP-dependent protein kinase, which transduces the signal through phosphorylation of different target proteins. The inactive kinase holoenzyme is a tetramer composed of two regulatory and two catalytic subunits. cAMP causes the dissociation of the inactive holoenzyme into a dimer…
P60900	Down regulated in DENGUE	PSMA6	Proteasome subunit alpha type-6 isoform Iso 1 \Gname=PSMA6	The proteasome is a multicatalytic proteinase complex with a highly ordered ring-shaped 20S core structure. The core structure is composed of 4 rings of 28 non-identical subunits; 2 rings are composed of 7 alpha subunits and 2 rings are composed of 7 beta subunits. Proteasomes are distributed throughout eukaryotic cells at a high concentration and cleave peptides in an ATP/ubiquitin-dependent pro…
Q9UNM6	Only in DENGUE	PSMD13	26S proteasome non-ATPase regulatory subunit 13 isoform Iso 1 \Gname=PSMD13	The 26S proteasome is a multicatalytic proteinase complex with a highly ordered structure composed of 2 complexes, a 20S core and a 19S regulator. The 20S core is composed of 4 rings of 28 non-identical subunits; 2 rings are composed of 7 alpha subunits and 2 rings are composed of 7 beta subunits. The 19S regulator is composed of a base, which contains 6 ATPase subunits and 2 non-ATPase subunits,…
P55036	Down regulated in DENGUE	PSMD4	26S proteasome non-ATPase regulatory subunit 4 isoform Rpn10E \Gname=PSMD4	The 26S proteasome is a multicatalytic proteinase complex with a highly ordered structure composed of 2 complexes, a 20S core and a 19S regulator. The 20S core is composed of 4 rings of 28 non-identical subunits; 2 rings are composed of 7 alpha subunits and 2 rings are composed of 7 beta subunits. The 19S regulator is composed of a base, which contains 6 ATPase subunits and 2 non-ATPase subunits,…
Q9H939	Up-regulated in DENGUE	PSTPIP2	Proline-serine-threonine phosphatase-interacting protein 2 isoform Iso 1 \Gname=PSTPIP2	Binds to F-actin. May be involved in regulation of the actin cytoskeleton (By similarity).
Q15185	Up-regulated in DENGUE	PTGES3	Prostaglandin E synthase 3 isoform Iso 1 \Gname=PTGES3	Molecular chaperone that localizes to genomic response elements in a hormone-dependent manner and disrupts receptor-mediated transcriptional activation, by promoting disassembly of transcriptional regulatory complexes.
Q03431	Only in DENGUE	PTH1R	Parathyroid hormone/parathyroid hormone-related peptide receptor isoform Iso 1 \Gname=PTH1R	The protein encoded by this gene is a member of the G-protein coupled receptor family 2. This protein is a receptor for parathyroid hormone (PTH) and for parathyroid hormone-like hormone (PTHLH). The activity of this receptor is mediated by G proteins which activate adenylyl cyclase and also a phosphatidylinositol-calcium second messenger system. Defects in this receptor are known to be the cause…
P20962	Only in DENGUE	PTMS	Parathymosin isoform Iso 1 \Gname=PTMS	Parathymosin may mediate immune function by blocking the effect of prothymosin alpha which confers resistance to certain opportunistic infections.
P29350	Only in Control	PTPN6	Tyrosine-protein phosphatase non-receptor type 6 isoform Iso 4 \Gname=PTPN6	The protein encoded by this gene is a member of the protein tyrosine phosphatase (PTP) family. PTPs are known to be signaling molecules that regulate a variety of cellular processes including cell growth, differentiation, mitotic cycle, and oncogenic transformation. N-terminal part of this PTP contains two tandem Src homolog (SH2) domains, which act as protein phospho-tyrosine binding domains, an…
P08575	Only in Control	PTPRC	Receptor-type tyrosine-protein phosphatase C isoform Iso 1 \Gname=PTPRC	The protein encoded by this gene is a member of the protein tyrosine phosphatase (PTP) family. PTPs are known to be signaling molecules that regulate a variety of cellular processes including cell growth, differentiation, mitotic cycle, and oncogenic transformation. This PTP contains an extracellular domain, a single transmembrane segment and two tandem intracytoplasmic catalytic domains, and thu…
P11216	Down regulated in DENGUE	PYGB	Glycogen phosphorylase, brain form isoform Iso 1 \Gname=PYGB	The protein encoded by this gene is a glycogen phosphorylase found predominantly in the brain. The encoded protein forms homodimers which can associate into homotetramers, the enzymatically active form of glycogen phosphorylase. The activity of this enzyme is positively regulated by AMP and negatively regulated by ATP, ADP, and glucose-6-phosphate. This enzyme catalyzes the rate-determining step …
Q13637	Up-regulated in DENGUE	RAB32	Ras-related protein Rab-32 isoform Iso 1 \Gname=RAB32	Small GTP-binding proteins of the RAB family, such as RAB32, play essential roles in vesicle and granule targeting
Q15286	Up-regulated in DENGUE	RAB35	Ras-related protein Rab-35 isoform Iso 1 \Gname=RAB35	The small GTPases Rab are key regulators of intracellular membrane trafficking, from the formation of transport vesicles to their fusion with membranes. Rabs cycle between an inactive GDP-bound form and an active GTP-bound form that is able to recruit to membranes different sets of downstream effectors directly responsible for vesicle formation
P61018	Down regulated in DENGUE	RAB4B	Ras-related protein Rab-4B isoform Iso 1 \Gname=RAB4B	RAB proteins, such as RAB4B, are members of the RAS superfamily of small GTPases that are involved in vesicular trafficking
Q15382	Up-regulated in DENGUE	RHEB	GTP-binding protein Rheb isoform Iso 1 \Gname=RHEB	This gene is a member of the small GTPase superfamily and encodes a lipid-anchored, cell membrane protein with five repeats of the RAS-related GTP-binding region. This protein is vital in regulation of growth and cell cycle progression due to its role in the insulin/TOR/S6K signaling pathway. The protein has GTPase activity and shuttles between a GDP-bound form and a GTP-bound form, and farnesyla…
P08134	Down regulated in DENGUE	RHOC	Rho-related GTP-binding protein RhoC isoform Iso 1 \Gname=RHOC	This gene encodes a member of the Rho family of small GTPases, which cycle between inactive GDP-bound and active GTP-bound states and function as molecular switches in signal transduction cascades. Rho proteins promote reorganization of the actin cytoskeleton and regulate cell shape, attachment, and motility. The protein encoded by this gene is prenylated at its C-terminus, and localizes to the c…
P13489	Down regulated in DENGUE	RNH1	Ribonuclease inhibitor isoform Iso 1 \Gname=RNH1	Placental ribonuclease inhibitor (PRI) is a member of a family of proteinaceous cytoplasmic RNase inhibitors that occur in many tissues and bind to both intracellular and extracellular RNases (summarized by Lee et al., 1988 [PubMed 3219362]). In addition to control of intracellular RNases, the inhibitor may have a role in the regulation of angiogenin (MIM 105850). Ribonuclease inhibitor, of 50,00…
P05388	Only in DENGUE	RPLP0	60S acidic ribosomal protein P0 isoform Iso 1 \Gname=RPLP0	Ribosomes, the organelles that catalyze protein synthesis, consist of a small 40S subunit and a large 60S subunit. Together these subunits are composed of 4 RNA species and approximately 80 structurally distinct proteins. This gene encodes a ribosomal protein that is a component of the 60S subunit. The protein, which is the functional equivalent of the E. coli L10 ribosomal protein, belongs to th…
Q8NHW5	Only in DENGUE	RPLP0P6	60S acidic ribosomal protein P0-like isoform Iso 1 \Gname=RPLP0P6	Ribosomal protein P0 is the functional equivalent of E.coli protein L10 (By similarity).
P05386	Down regulated in DENGUE	RPLP1	60S acidic ribosomal protein P1 isoform Iso 1 \Gname=RPLP1	Ribosomes, the organelles that catalyze protein synthesis, consist of a small 40S subunit and a large 60S subunit. Together these subunits are composed of 4 RNA species and approximately 80 structurally distinct proteins. This gene encodes a ribosomal phosphoprotein that is a component of the 60S subunit. The protein, which is a functional equivalent of the E. coli L7/L12 ribosomal protein, belon…
P62979	Up-regulated in DENGUE	RPS27A	Ubiquitin-40S ribosomal protein S27a isoform Iso 1 \Gname=RPS27A	Ubiquitin, a highly conserved protein that has a major role in targeting cellular proteins for degradation by the 26S proteosome, is synthesized as a precursor protein consisting of either polyubiquitin chains or a single ubiquitin fused to an unrelated protein. This gene encodes a fusion protein consisting of ubiquitin at the N terminus and ribosomal protein S27a at the C terminus. When expresse…
P08865	Only in DENGUE	RPSA	40S ribosomal protein SA isoform Iso 1 \Gname=RPSA	Laminins, a family of extracellular matrix glycoproteins, are the major noncollagenous constituent of basement membranes. They have been implicated in a wide variety of biological processes including cell adhesion, differentiation, migration, signaling, neurite outgrowth and metastasis. Many of the effects of laminin are mediated through interactions with cell surface receptors. These receptors i…
Q9P2E9	Only in DENGUE	RRBP1	Ribosome-binding protein 1 isoform Iso 1 \Gname=RRBP1	Placental ribonuclease inhibitor (PRI) is a member of a family of proteinaceous cytoplasmic RNase inhibitors that occur in many tissues and bind to both intracellular and extracellular RNases (summarized by Lee et al., 1988 [PubMed 3219362]). In addition to control of intracellular RNases, the inhibitor may have a role in the regulation of angiogenin (MIM 105850). Ribonuclease inhibitor, of 50,00…
Q9Y512	Only in Control	SAMM50	Sorting and assembly machinery component 50 homolog isoform Iso 1 \Gname=SAMM50	SAMM50 is a component of the sorting and assembly machinery (SAM) complex of the outer mitochondrial membrane. The SAM complex has a role in integrating beta-barrel proteins into the outer mitochondrial membrane
P01009	Down regulated in DENGUE	SERPINA1	Alpha-1-antitrypsin isoform Iso 1 \Gname=SERPINA1	The protein encoded by this gene is secreted and is a serine protease inhibitor whose targets include elastase, plasmin, thrombin, trypsin, chymotrypsin, and plasminogen activator. Defects in this gene can cause emphysema or liver disease. Several transcript variants encoding the same protein have been found for this gene.
Q9Y371	Down regulated in DENGUE	SH3GLB1	Endophilin-B1 isoform Iso 3 \Gname=SH3GLB1	May be required for normal outer mitochondrial membrane dynamics. Required for coatomer-mediated retrograde transport in certain cells. May recruit other proteins to membranes with high curvature. May promote membrane fusion.
P53007	Up-regulated in DENGUE	SLC25A1	Tricarboxylate transport protein, mitochondrial isoform Iso 1 \Gname=SLC25A1	The mitochondrial tricarboxylate transporter (also called citrate transport protein, or CTP) is responsible for the movement of citrate across the mitochondrial inner membrane
Q8TDB8	Up-regulated in DENGUE	SLC2A14	Solute carrier family 2, facilitated glucose transporter member 14 isoform Iso 1 \Gname=SLC2A14	Members of the glucose transporter (GLUT) family, including SLC2A14, are highly conserved integral membrane proteins that transport hexoses such as glucose and fructose into all mammalian cells. GLUTs show tissue and cell-type specific expression
P11169	Up-regulated in DENGUE	SLC2A3	Solute carrier family 2, facilitated glucose transporter member 3 isoform Iso 1 \Gname=SLC2A3	Facilitative glucose transporter. Probably a neuronal glucose transporter.
Q14BN4	Only in DENGUE	SLMAP	Sarcolemmal membrane-associated protein isoform Iso 4 \Gname=SLMAP	May play a role during myoblast fusion (By similarity).
O60493	Down regulated in DENGUE	SNX3	Sorting nexin-3 isoform Iso 4 \Gname=SNX3	This gene encodes a member of the sorting nexin family. Members of this family contain a phox (PX) domain, which is a phosphoinositide binding domain, and are involved in intracellular trafficking. This protein does not contain a coiled coil region, like most family members. This protein interacts with phosphatidylinositol-3-phosphate, and is involved in protein trafficking.
Q9Y5X3	Only in Control	SNX5	Sorting nexin-5 isoform Iso 1 \Gname=SNX5	This gene encodes a member of the sorting nexin family. Members of this family contain a phox (PX) domain, which is a phosphoinositide binding domain, and are involved in intracellular trafficking. This protein binds to fanconi anemia complementation group A protein, but its function is unknown. This gene results in two transcript variants encoding the same protein.
P10124	Down regulated in DENGUE	SRGN	Serglycin isoform Iso 1 \Gname=SRGN	This gene encodes a protein best known as a hematopoietic cell granule proteoglycan. Proteoglycans stored in the secretory granules of many hematopoietic cells also contain a protease-resistant peptide core, which may be important for neutralizing hydrolytic enzymes. This encoded protein was found to be associated with the macromolecular complex of granzymes and perforin, which may serve as a med…
Q8IZP2	Down regulated in DENGUE	ST13P4	Putative protein FAM10A4 isoform Iso 1 \Gname=ST13P4	No functional information for this protein
Q9Y6E0	Down regulated in DENGUE	STK24	Serine/threonine-protein kinase 24 isoform A \Gname=STK24	The yeast 'Sterile 20' gene (STE20) functions upstream of the mitogen-activated protein kinase (MAPK) cascade. In mammals, protein kinases related to STE20 can be divided into 2 subfamilies based on their structure and regulation. Members of the PAK subfamily (see PAK3; MIM 300142) contain a C-terminal catalytic domain and an N-terminal regulatory domain that has a CDC42 (MIM 116952)-binding doma…
Q9Y3F4	Down regulated in DENGUE	STRAP	Serine-threonine kinase receptor-associated protein isoform Iso 1 \Gname=STRAP	The SMN complex plays a catalyst role in the assembly of small nuclear ribonucleoproteins (snRNPs), the building blocks of the spliceosome. Thereby, plays an important role in the splicing of cellular pre-mRNAs. Most spliceosomal snRNPs contain a common set of Sm proteins SNRPB,
P61956	Down regulated in DENGUE	SUMO2	Small ubiquitin-related modifier 2 isoform Iso 1 \Gname=SUMO2	This gene encodes a protein that is a member of the SUMO (small ubiquitin-like modifier) protein family. It functions in a manner similar to ubiquitin in that it is bound to target proteins as part of a post-translational modification system. However, unlike ubiquitin which targets proteins for degradation, this protein is involved in a variety of cellular processes, such as nuclear transport, tr…
P55854	Down regulated in DENGUE	SUMO3	Small ubiquitin-related modifier 3 isoform Iso 1 \Gname=SUMO3	SUMO proteins, such as SUMO3, and ubiquitin (see MIM 191339) posttranslationally modify numerous cellular proteins and affect their metabolism and function. However, unlike ubiquitination, which targets proteins for degradation, sumoylation participates in a number of cellular processes, such as nuclear transport, transcriptional regulation, apoptosis, and protein stability
Q6EEV6	Down regulated in DENGUE	SUMO4	Small ubiquitin-related modifier 4 isoform Iso 1 \Gname=SUMO4	This gene is a member of the SUMO gene family. This family of genes encode small ubiquitin-related modifiers that are attached to proteins and control the target proteins' subcellular localization, stability, or activity. The protein described in this record is located in the cytoplasm and specifically modifies IKBA, leading to negative regulation of NF-kappa-B-dependent transcription of the IL12…
Q16563	Only in DENGUE	SYPL1	Synaptophysin-like protein 1 isoform Iso 2 \Gname=SYPL1	Transport. Synaptic transmission. Transporter activity.
P37802	Down regulated in DENGUE	TAGLN2	Transgelin-2 isoform Iso 1 \Gname=TAGLN2	The protein encoded by this gene is a homolog of the protein transgelin, which is one of the earliest markers of differentiated smooth muscle. The function of this protein has not yet been determined.
Q9NVG8	Only in DENGUE	TBC1D13	TBC1 domain family member 13 isoform Iso 1 \Gname=TBC1D13	May act as a GTPase-activating protein for Rab family protein(s).
Q86YL5	Only in Control	TDRP	Testis development-related protein isoform Iso 1 \Gname=TDRP	Spermatogenesis
Q8N2U0	Only in DENGUE	TMEM256	Transmembrane protein 256 isoform Iso 1 \Gname=TMEM256	No functional information for this protein.
P57088	Only in Control	TMEM33	Transmembrane protein 33 isoform Iso 1 \Gname=TMEM33	Structural constituent of nuclear pore.
Q9NYL9	Down regulated in DENGUE	TMOD3	Tropomodulin-3 isoform Iso 1 \Gname=TMOD3	Blocks the elongation and depolymerization of the actin filaments at the pointed end. The Tmod/TM complex contributes to the formation of the short actin protofilament, which in turn defines the geometry of the membrane skeleton (By similarity).
P63313	Only in DENGUE	TMSB10	Thymosin beta-10 isoform Iso 1 \Gname=TMSB10	Plays an important role in the organization of the cytoskeleton. Binds to and sequesters actin monomers (G actin) and therefore inhibits actin polymerization (By similarity).
P09493	Up-regulated in DENGUE	TPM1	Tropomyosin alpha-1 chain isoform Iso 2 \Gname=TPM1	This gene is a member of the tropomyosin family of highly conserved, widely distributed actin-binding proteins involved in the contractile system of striated and smooth muscles and the cytoskeleton of non-muscle cells. Tropomyosin is composed of two alpha-helical chains arranged as a coiled-coil. It is polymerized end to end along the two grooves of actin filaments and provides stability to the f…
P67936	Up-regulated in DENGUE	TPM4	Tropomyosin alpha-4 chain isoform Iso 2 \Gname=TPM4	This gene encodes a member of the tropomyosin family of actin-binding proteins involved in the contractile system of striated and smooth muscles and the cytoskeleton of non-muscle cells. Tropomyosins are dimers of coiled-coil proteins that polymerize end-to-end along the major groove in most actin filaments. They provide stability to the filaments and regulate access of other actin-binding protei…
Q8NG06	Up-regulated in DENGUE	TRIM58	Tripartite motif-containing protein 58 isoform Iso 1 \Gname=TRIM58	Zinc ion binding.
Q15642	Only in DENGUE	TRIP10	Cdc42-interacting protein 4 isoform Iso 5 \Gname=TRIP10	Required for translocation of GLUT4 to the plasma membrane in response to insulin signaling (By similarity). Required to coordinate membrane tubulation with reorganization of the actin cytoskeleton during endocytosis
Q99816	Only in Control	TSG101	Tumor susceptibility gene 101 protein isoform Iso 1 \Gname=TSG101	The protein encoded by this gene belongs to a group of apparently inactive homologs of ubiquitin-conjugating enzymes. The gene product contains a coiled-coil domain that interacts with stathmin, a cytosolic phosphoprotein implicated in tumorigenesis. The protein may play a role in cell growth and differentiation and act as a negative growth regulator. In vitro steady-state expression of this tumo…
Q3ZCM7	Down regulated in DENGUE	TUBB8	Tubulin beta-8 chain isoform Iso 1 \Gname=TUBB8	Tubulin is the major constituent of microtubules. It binds two moles of GTP, one at an exchangeable site on the beta chain and one at a non-exchangeable site on the alpha chain (By similarity).
Q6IBS0	Down regulated in DENGUE	TWF2	Twinfilin-2 isoform Iso 1 \Gname=TWF2	The protein encoded by this gene was identified by its interaction with the catalytic domain of protein kinase C-zeta. The encoded protein contains an actin-binding site and an ATP-binding site. It is most closely related to twinfilin (PTK9), a conserved actin monomer-binding protein.
P10599	Down regulated in DENGUE	TXN	Thioredoxin isoform Iso 1 \Gname=TXN	Thioredoxin is a 12-kD oxidoreductase enzyme containing a dithiol-disulfide active site. It is ubiquitous and found in many organisms from plants and bacteria to mammals. Multiple in vitro substrates for thioredoxin have been identified, including ribonuclease, choriogonadotropins, coagulation factors, glucocorticoid receptor, and insulin. Reduction of insulin is classically used as an activity t…
Q8TBC4	Only in Control	UBA3	NEDD8-activating enzyme E1 catalytic subunit isoform Iso 1 \Gname=UBA3	The modification of proteins with ubiquitin is an important cellular mechanism for targeting abnormal or short-lived proteins for degradation. Ubiquitination involves at least three classes of enzymes: ubiquitin-activating enzymes, or E1s, ubiquitin-conjugating enzymes, or E2s, and ubiquitin-protein ligases, or E3s. This gene encodes a member of the E1 ubiquitin-activating enzyme family. The enco…
P62987	Up-regulated in DENGUE	UBA52	Ubiquitin-60S ribosomal protein L40 isoform Iso 1 \Gname=UBA52	Ubiquitin is a highly conserved nuclear and cytoplasmic protein that has a major role in targeting cellular proteins for degradation by the 26S proteosome. It is also involved in the maintenance of chromatin structure, the regulation of gene expression, and the stress response. Ubiquitin is synthesized as a precursor protein consisting of either polyubiquitin chains or a single ubiquitin moiety f…
Q8TF42	Down regulated in DENGUE	UBASH3B	Ubiquitin-associated and SH3 domain-containing protein B isoform Iso 1 \Gname=UBASH3B	This gene encodes a protein that contains a ubiquitin associated domain at the N-terminus, an SH3 domain, and a C-terminal domain with similarities to the catalytic motif of phosphoglycerate mutase. The encoded protein was found to inhibit endocytosis of epidermal growth factor receptor (EGFR) and platelet-derived growth factor receptor.
P0CG47	Up-regulated in DENGUE	UBB	Polyubiquitin-B isoform Iso 1 \Gname=UBB	This gene encodes ubiquitin, one of the most conserved proteins known. Ubiquitin is required for ATP-dependent, nonlysosomal intracellular protein degradation of abnormal proteins and normal proteins with a rapid turnover. Ubiquitin is covalently bound to proteins to be degraded, and presumably labels these proteins for degradation. Ubiquitin also binds to histone H2A in actively transcribed regi…
P0CG48	Up-regulated in DENGUE	UBC	Polyubiquitin-C isoform Iso 1 \Gname=UBC	This gene represents a ubiquitin gene, ubiquitin C. The encoded protein is a polyubiquitin precursor. Conjugation of ubiquitin monomers or polymers can lead to various effects within a cell, depending on the residues to which ubiquitin is conjugated. Ubiquitination has been associated with protein degradation, DNA repair, cell cycle regulation, kinase modification, endocytosis, and regulation of …
P51668	Only in DENGUE	UBE2D1	Ubiquitin-conjugating enzyme E2 D1 isoform Iso 1 \Gname=UBE2D1	The modification of proteins with ubiquitin is an important cellular mechanism for targeting abnormal or short-lived proteins for degradation. Ubiquitination involves at least three classes of enzymes: ubiquitin-activating enzymes, or E1s, ubiquitin-conjugating enzymes, or E2s, and ubiquitin-protein ligases, or E3s. This gene encodes a member of the E2 ubiquitin-conjugating enzyme family. This en…
P62837	Only in DENGUE	UBE2D2	Ubiquitin-conjugating enzyme E2 D2 isoform Iso 2 \Gname=UBE2D2	The modification of proteins with ubiquitin is an important cellular mechanism for targeting abnormal or short-lived proteins for degradation. Ubiquitination involves at least three classes of enzymes: ubiquitin-activating enzymes, or E1s, ubiquitin-conjugating enzymes, or E2s, and ubiquitin-protein ligases, or E3s. This gene encodes a member of the E2 ubiquitin-conjugating enzyme family. This en…
P61077	Only in DENGUE	UBE2D3	Ubiquitin-conjugating enzyme E2 D3 isoform Iso 1 \Gname=UBE2D3	The modification of proteins with ubiquitin is an important cellular mechanism for targeting abnormal or short-lived proteins for degradation. Ubiquitination involves at least three classes of enzymes: ubiquitin-activating enzymes, or E1s, ubiquitin-conjugating enzymes, or E2s, and ubiquitin-protein ligases, or E3s. This gene encodes a member of the E2 ubiquitin-conjugating enzyme family. This en…
Q9Y2X8	Only in DENGUE	UBE2D4	Ubiquitin-conjugating enzyme E2 D4 isoform Iso 1 \Gname=UBE2D4	The modification of proteins with ubiquitin is an important cellular mechanism for targeting abnormal or short-lived proteins for degradation. Ubiquitination involves at least three classes of enzymes: ubiquitin-activating enzymes, or E1s, ubiquitin-conjugating enzymes, or E2s, and ubiquitin-protein ligases, or E3s. This gene encodes a member of the E2 ubiquitin-conjugating enzyme family. This en…
P61086	Down regulated in DENGUE	UBE2K	Ubiquitin-conjugating enzyme E2 K isoform Iso 1 \Gname=UBE2K	The protein encoded by this gene belongs to the ubiquitin-conjugating enzyme family. This protein interacts with RING finger proteins, and it can ubiquitinate huntingtin, the gene product for Huntington's disease. Known functions for this protein include a role in aggregate formation of expanded polyglutamine proteins and the suppression of apoptosis in polyglutamine diseases, a role in the dislo…
P61088	Down regulated in DENGUE	UBE2N	Ubiquitin-conjugating enzyme E2 N isoform Iso 1 \Gname=UBE2N	The modification of proteins with ubiquitin is an important cellular mechanism for targeting abnormal or short-lived proteins for degradation. Ubiquitination involves at least three classes of enzymes: ubiquitin-activating enzymes, or E1s, ubiquitin-conjugating enzymes, or E2s, and ubiquitin-protein ligases, or E3s. This gene encodes a member of the E2 ubiquitin-conjugating enzyme family. Studies…
Q5JXB2	Down regulated in DENGUE	UBE2NL	Putative ubiquitin-conjugating enzyme E2 N-like isoform Iso 1 \Gname=UBE2NL	This gene is intronless and encodes a member of the ubiquitin-conjugating enzyme family. The protein product is 91% identical to ubiquitin-conjugating enzyme E2N, a multi-exon gene product.
Q9Y3C8	Only in DENGUE	UFC1	Ubiquitin-fold modifier-conjugating enzyme 1 isoform Iso 1 \Gname=UFC1	UFC1 is an E2-like conjugating enzyme for ubiquitin-fold modifier-1 (UFM1; MIM 610553)
Q96IX5	Down regulated in DENGUE	USMG5	Up-regulated during skeletal muscle growth protein 5 isoform Iso 1 \Gname=USMG5	Plays a critical role in maintaining the ATP synthase population in mitochondria.
P21796	Down regulated in DENGUE	VDAC1	Voltage-dependent anion-selective channel protein 1 isoform Iso 1 \Gname=VDAC1	This gene encodes a voltage-dependent anion channel protein that is a major component of the outer mitochondrial membrane. The encoded protein facilitates the exchange of metabolites and ions across the outer mitochondrial membrane and may regulate mitochondrial functions. This protein also forms channels in the plasma membrane and may be involved in transmembrane electron transport. Alternate sp…
Q9Y277	Down regulated in DENGUE	VDAC3	Voltage-dependent anion-selective channel protein 3 isoform Iso 1 \Gname=VDAC3	VDAC3 belongs to a group of mitochondrial membrane channels involved in translocation of adenine nucleotides through the outer membrane. These channels may also function as a mitochondrial binding site for hexokinase (see HK1; MIM 142600) and glycerol kinase
Q8N0U8	Only in DENGUE	VKORC1L1	Vitamin K epoxide reductase complex subunit 1-like protein 1 isoform Iso 1 \Gname=VKORC1L1	Involved in vitamin K metabolism. Can reduce inactive vitamin K 2,3-epoxide to active vitamin K (in vitro), and may contribute to vitamin K-mediated protection against oxidative stress. Plays a role in vitamin K-dependent gamma-carboxylation of Glu residues in target proteins.
Q86VN1	Only in Control	VPS36	Vacuolar protein-sorting-associated protein 36 isoform Iso 1 \Gname=VPS36	VPS36, VPS22 (SNF8; MIM 610904), and VPS25 (MIM 610907) form ESCRT-II (endosomal sorting complex required for transport II), a complex involved in endocytosis of ubiquitinated membrane proteins. VPS36, VPS22, and VPS25 are also associated in a multiprotein complex with RNA polymerase II elongation factor (ELL; MIM 600284) (Slagsvold et al., 2005 [PubMed 15755741]; Kamura et al., 2001 [PubMed 1127…
Q5JSH3	Only in DENGUE	WDR44	WD repeat-containing protein 44 isoform Iso 4 \Gname=WDR44	This gene encodes a protein that interacts with the small GTPase rab11. A similar protein in rat binds the GTP-containing active form of rab11. This protein may play a role in endosome recycling. Alternate splicing results in multiple transcript variants.
Q9NX65	Only in Control	ZSCAN32	Zinc finger and SCAN domain-containing protein 32 isoform Iso 1 \Gname=ZSCAN32	May be involved in transcriptional regulation.
